# Supplementary material for: Asymmetric rhodium-catalyzed click cycloaddition to access C–N axially chiralN-triazolyl indoles
Source: Royal Society of Chemistry journal article supplement (doi:10.1039/d3sc00610g), 2023-01-01
Supplement: d3sc00610g1.pdf [file d3sc00610g1.pdf]

## Supporting Information

### Asymmetric Rhodium-Catalyzed Click Cycloaddition to Access C-N Axially Chiral *N*-Triazolyl Indoles

Li Zhou<sup>1,†</sup>, Yankun Li<sup>1,†</sup>, Shunian Li<sup>1</sup>, Zhenwei Shi<sup>1</sup>, Xue Zhang<sup>1</sup>, Chen-Ho Tung<sup>1</sup>, and  
Zhenghu Xu<sup>1,2,3\*</sup>

<sup>1</sup>Key Lab of Colloid and Interface Chemistry of Ministry of Education, School of  
Chemistry and Chemical Engineering, Shandong University, No. 27 South Shanda  
Road, Jinan, Shandong 250100

<sup>2</sup>State Key Laboratory of Organometallic Chemistry, Shanghai Institute of Organic  
Chemistry, Chinese Academy of Sciences, Shanghai 200032

<sup>3</sup>Key Laboratory of Precise Synthesis of Functional Molecules of Zhejiang Province,  
School of Science, Westlake University, No. 18 Shilongshan Road, Hangzhou 310024

\*Corresponding Author: [xuzh@sdu.edu.cn](mailto:xuzh@sdu.edu.cn);

<sup>†</sup>L. Zhou and Y. K. Li contributed equally to this work.

### Table of Contents

|                                                                  |      |
|------------------------------------------------------------------|------|
| 1. General information.....                                      | S2   |
| 2. Optimization of the reaction conditions.....                  | S3   |
| 3. Proposed mechanism.....                                       | S7   |
| 4. Procedure for the atroposelective click reaction.....         | S7   |
| 5. Thermal racemization experiments.....                         | S8   |
| 6. Gram-scale experiment and synthetic applications.....         | S12  |
| 7. X-ray crystallographic data for <b>13</b> and <b>25</b> ..... | S18  |
| 8. Characterization of Products <b>3-57</b> .....                | S22  |
| 9. NMR spectra.....                                              | S105 |
| 10. References.....                                              | S165 |

## 1. General information

The solvents used in the reaction were dried by  $\text{CaH}_2$  or purchased from J&K or local companies unless additional notes, and all the reagents were obtained commercially and used without further purification. All the reactions were performed in the overdried glassware with magnetic stirring under nitrogen atmosphere. Column chromatography was performed with silica gel (100-200 mesh) as the stationary phase. Solvent compositions are given in (v/v). Reactions were monitored by TLC. All NMR spectra were recorded on Bruker-500 MHz spectrometer in  $\text{CDCl}_3$ , and the chemical shifts ( $\delta$ ) and coupling constants ( $J$ ) were expressed in ppm and Hz respectively. High resolution mass spectra (HRMS) were measured on the Bruker-Impact II instruments obtained by the Analytical Center for Structural Constituent and Physical Property in Shandong University. All substitutes were prepared according to the reported methods.<sup>1-3</sup>

## 2. Optimization of the reaction conditions

**Table S1.** Screening of metal catalyst<sup>[a]</sup>

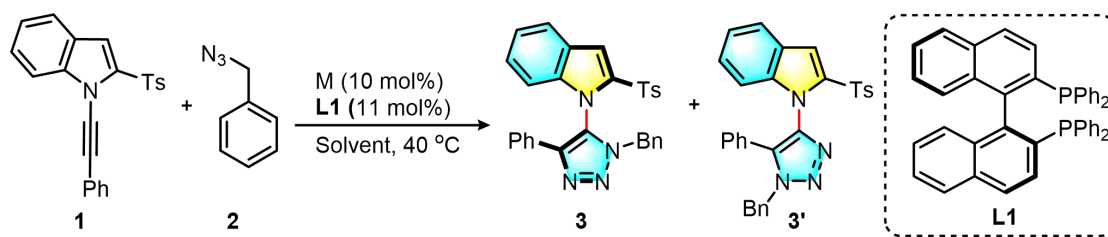

| entry            | metal                                | ligand    | solvent | yield of <b>3</b> (%) <sup>[b]</sup> | yield of <b>3'</b> (%) <sup>[b]</sup> | er <sup>[c]</sup> |
|------------------|--------------------------------------|-----------|---------|--------------------------------------|---------------------------------------|-------------------|
| 1                | CuI                                  | -         | DCE     | -                                    | -                                     | -                 |
| 2 <sup>[d]</sup> | [Ir(COD)Cl] <sub>2</sub>             | -         | MeCN    | trace                                | 45                                    | -                 |
| 3                | [Rh(CO)Cl] <sub>2</sub>              | -         | MeCN    | 55                                   | -                                     | -                 |
| 4 <sup>[e]</sup> | Rh(COD) <sub>2</sub> Cl              | <b>L1</b> | DCE     | 41                                   | -                                     | 61.5:38.5         |
| 5                | Rh(COD) <sub>2</sub> BF <sub>4</sub> | <b>L1</b> | DCE     | 19                                   | -                                     | 89.5:10.5         |

[a] Reaction conditions: A mixture of **1a** (0.1 mmol), **2a** (0.2 mmol), metal (10 mol%), ligand (11 mol%), solvent (2.5 mL) for 36 hours. [b] Isolated yields of **3a** were reported. [c] Determined by HPLC analysis using a chiral stationary phase. [d] [Ir(COD)Cl]<sub>2</sub> (5 mol%). When using iridium catalyst, the corresponding triazolyl indole **3** bearing C-N chiral axle cannot be yielded but its regio isomer **3'** can be accessible. Product **3'** has no any chiral axis, since its less steric hindrance than that of **3** leading to the result that its C-N bond between indolyl and triazolyl can rotate freely. [e] AgNTf<sub>2</sub> (20 mol%).

**Table S2.** Screening of the solvent<sup>[a]</sup>
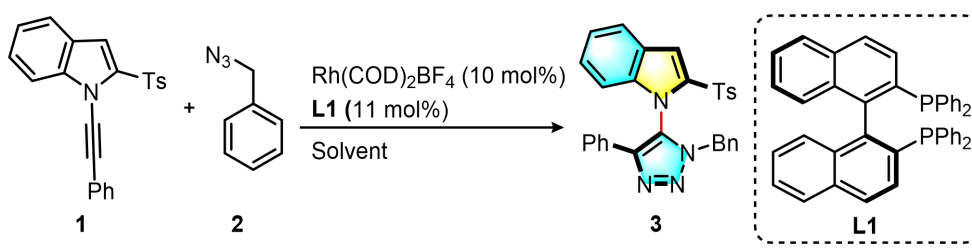

| entry             | solvent               | T(°C) | yield (%) <sup>[b]</sup> | er <sup>[c]</sup> |
|-------------------|-----------------------|-------|--------------------------|-------------------|
| 1                 | DCM                   | 25    | <10                      |                   |
| 2                 | DCE                   | 40    | 21                       | 89.5:10.5         |
| 3                 | MeCN                  | 40    | 0                        |                   |
| 4                 | Toluene               | 40    | 19                       | 90:10             |
| 5                 | Dioxane               | 40    | 29                       | 88.5:11.5         |
| 6                 | DCE:MeOH=3:1          | 40    | 24                       | 50:50             |
| 7                 | Hexane                | 40    | 0                        |                   |
| 8                 | Hexane:DCM = 4:1      | 40    | 30                       | 92:8              |
| 9                 | Hexane:DCE = 4:1      | 40    | 52                       | 91.5:8.5          |
| 10 <sup>[d]</sup> | Hexane:DCE = 4:1      | 40    | 81                       | 91.5:8.5          |
| 11 <sup>[d]</sup> | Cyclohexane:DCE = 4:1 | 40    | 62                       | 93.5:6.5          |

[a] Reaction conditions: A mixture of **1a** (0.1 mmol), **2a** (0.2 mmol), [Rh] (10 mol%), ligand (11 mol%), solvent (2.5 mL) for 36 hours. [b] Isolated yields of **3a** were reported. [c] Determined by HPLC analysis using a chiral stationary phase. [d] NaBAR<sup>F</sup><sub>4</sub> (11 mol%).

**Table S3.** Screening of the mix-solvent<sup>[a]</sup>
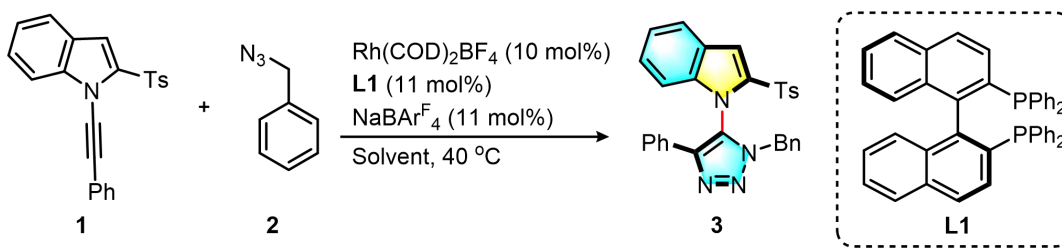

| entry            | solvent         | ratio               | yield (%) <sup>[b]</sup> | er <sup>[c]</sup> |
|------------------|-----------------|---------------------|--------------------------|-------------------|
| 1                | Hexane:DCE      | 4:1 (2 mL:0.5 mL)   | 81                       | 91.5:8.5          |
| 2                | Cyclohexane:DCE | 4:1 (2 mL:0.5 mL)   | 62                       | 93.5:6.5          |
| 3                | Cyclohexane:DCE | 2:1 (1.6 mL:0.8 mL) | 52                       | 92.5:7.5          |
| 4                | Cyclohexane:DCE | 1:1 (1.2 mL:1.2mL)  | 38                       | 89:11             |
| 5                | Cyclohexane:DCE | 1:2 (0.8 mL:1.6 mL) | 41                       | 87.5:12.5         |
| 6                | Cyclohexane:DCE | 5:1 (2 mL:0.4 mL)   | 56                       | 92:8              |
| 7 <sup>[d]</sup> | Cyclohexane:DCE | 4:1 (2 mL:0.5 mL)   | 95                       | 93.5:6.5          |

[a] Reaction conditions: A mixture of **1a** (0.1 mmol), **2a** (0.2 mmol), [Rh] (10 mol%), ligand (11

mol%), NaBAR<sup>F</sup><sub>4</sub> (11 mol%), solvent (2.5 mL) for 36 hours. [b] Isolated yields of 3a were reported. [c] Determined by HPLC analysis using a chiral stationary phase. [d] The reaction time was extended to 48 hours.

**Table S4.** Screening of the ligand<sup>[a]</sup>

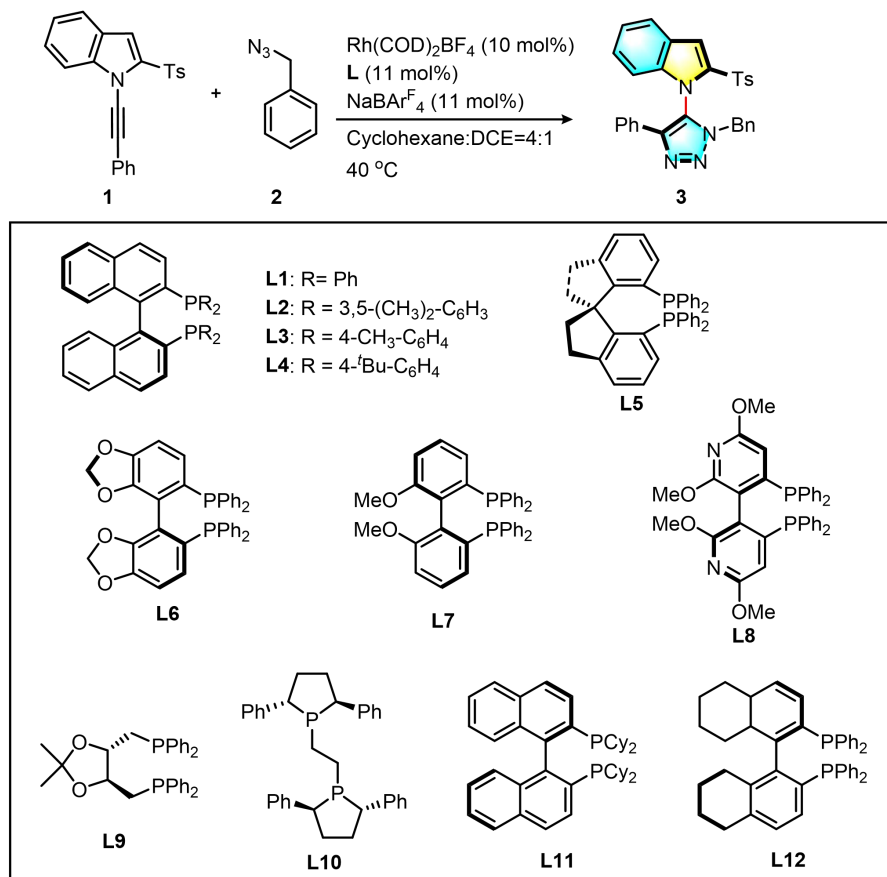

| entry            | ligand | yield/% <sup>[b]</sup> | er <sup>[c]</sup> |
|------------------|--------|------------------------|-------------------|
| 1                | L1     | 95                     | 93.5:6.5          |
| 2 <sup>[d]</sup> | L1     | 46                     | 65.5:34.5         |
| 3                | L2     | 89                     | 91.5:8.5          |
| 4                | L3     | 93                     | 95:5              |
| 5                | L4     | 84                     | 94.5:5.5          |
| 6                | L5     | 47                     | 30:70             |
| 7                | L6     | 67                     | 94.5:5.5          |
| 8                | L7     | 48                     | 90:10             |
| 9                | L8     | 59                     | 3.5:96.5          |
| 10               | L9     | <10                    | -                 |
| 11               | L10    | 56                     | 49:50             |
| 12               | L11    | 35                     | 15:85             |
| 13               | L12    | 94                     | 8.5:91.5          |

[a] Reaction conditions: A mixture of **1a** (0.1 mmol), **2a** (0.2 mmol), [Rh] (10 mol%), ligand (11 mol%), NaBAR<sub>4</sub><sup>F</sup> (11 mol%), solvent (2.5 mL) for 48 hours. [b] Isolated yields of **3a** were reported. [c] Determined by HPLC analysis using a chiral stationary phase. [d] [Rh] (5 mol%), ligand (5.5 mol%), NaBAR<sub>4</sub><sup>F</sup> (5.5 mol%)

**Table S5.** Screening of the temperature<sup>[a]</sup>

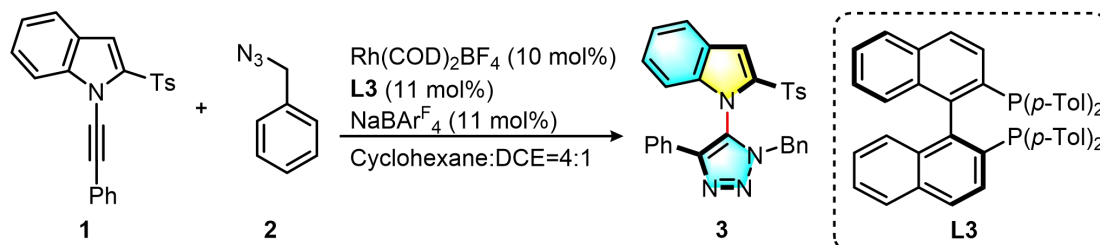

| entry | T(°C) | yield (%) <sup>[b]</sup> | er <sup>[c]</sup> |
|-------|-------|--------------------------|-------------------|
| 1     | 25    | 78                       | 94:6              |
| 2     | 40    | 93                       | 95:5              |
| 3     | 50    | 94                       | 93.5:6.5          |

[a] Reaction conditions: A mixture of **1a** (0.1 mmol), **2a** (0.2 mmol), [Rh] (10 mol%), ligand (11 mol%), NaBAR<sub>4</sub><sup>F</sup> (11 mol%), solvent (2.5 mL) for 48 hours. [b] Isolated yields of **3a** were reported. [c] Determined by HPLC analysis using a chiral stationary phase.

### 3. Proposed mechanism

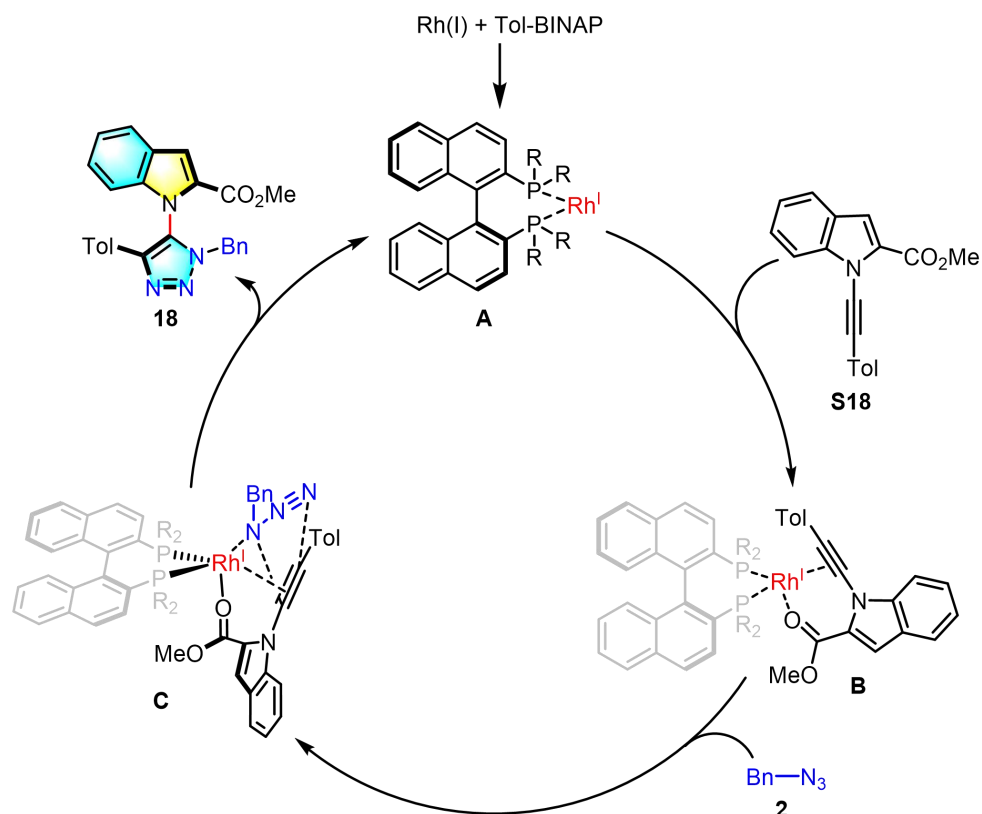

### 4. Procedure for the atroposelective click reaction

#### 4.1 General procedure for the asymmetric synthesis of triazole

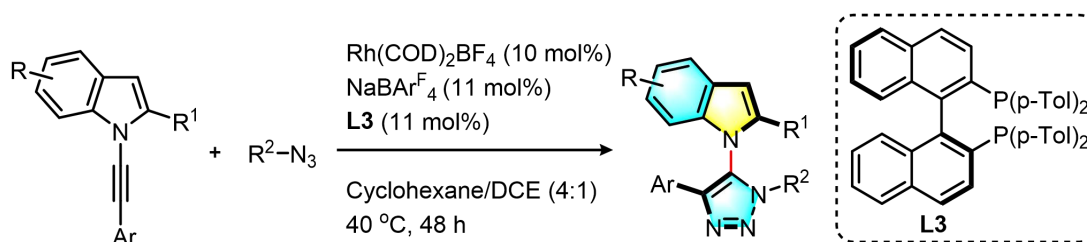

To a solution of N-alkynyl indole (0.1 mmol, 1.0 equiv.),  $\text{Rh}(\text{COD})_2\text{BF}_4$  (4.0 mg, 0.010 mmol, 10 mol%),  $\text{NaBARF}_4$  (9.7 mg, 0.011 mmol, 11 mol%) and **L3** (7.5 mg, 0.011 mmol, 11 mol%) in dried mixed solvent of cyclohexane (2.0 mL) and DCE (0.5 mL) were added azide (0.2 mmol, 2.0 equiv.) under nitrogen atmosphere. The mixture was heated to 40 °C and stirred for 48 h in a water bath. The reaction was monitored by TLC. The mixture was allowed to cool down to the room temperature and concentrated in vacuo. The residue was purified by silica gel (100-200 mesh)

column chromatography to get the corresponding triazole.

#### 4.2 Typical procedure for the asymmetric synthesis of **3**

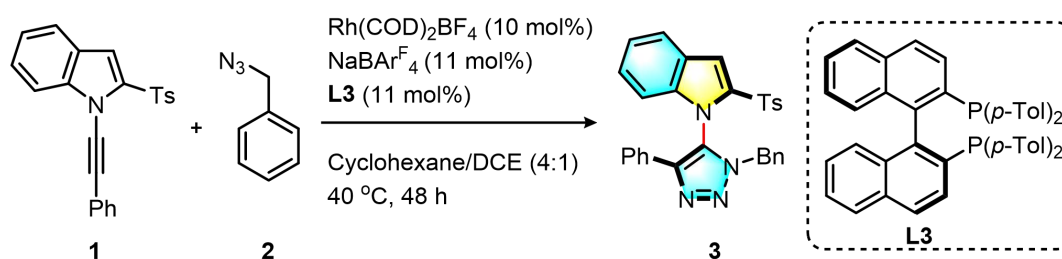

To a solution of alkynyl indole **1** (37.1 mg, 0.1 mmol, 1.0 equiv.),  $\text{Rh}(\text{COD})_2\text{BF}_4$  (4.0 mg, 0.010 mmol, 10 mol%),  $\text{NaBAR}^{\text{F}}_4$  (9.7 mg, 0.011 mmol, 11 mol%) and **L3** (7.5 mg, 0.011 mmol, 11 mol%) in dried mixed solvent of cyclohexane (2.0 mL) and DCE (0.5 mL) were added azide **2** (25  $\mu\text{L}$ , 0.2 mmol, 2.0 equiv.) by microsyringe under nitrogen atmosphere. The mixture was heated to 40 °C and stirred for 48 h in a water bath. The reaction was monitored by TLC. The mixture was allowed to cool down to the room temperature and concentrated in vacuo. The residue was purified by silica gel (100-200 mesh) column chromatography with petroleum ether/ethyl acetate (8:1) as eluent to get the corresponding triazole **3** (47.0 mg, white solid, 93% yield, 95:5 er).

#### 5. Thermal racemization experiments

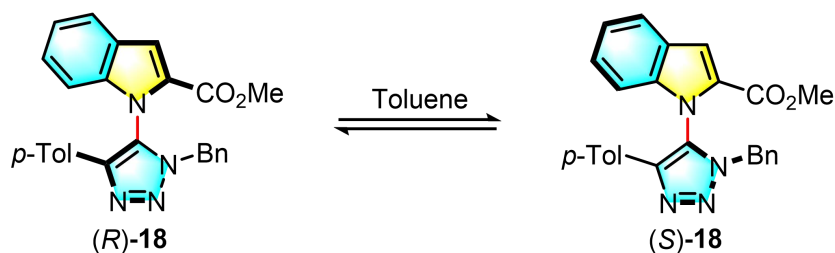

As a new type of heterobiaryls, we studied the configurational stability of **18** at various temperatures. 15 mg of **18** (96% ee) was dissolved in toluene and heated in a sealed tube at the indicated temperature for the corresponding time. At 60 °C, the configuration remains very stable and no racemization occurred after 72 hrs. At 90 °C, the enantioselectivity kept very well in 24 hrs, and slightly decreased from 96% to



92%; however, the ee value dropped very quick to 62% in 12 hrs at 120 °C and decreased to 40% in 24 hrs.

**Table S6** Thermal racemization experiments

| time/h | 60 °C  | 90 °C  | 120 °C |
|--------|--------|--------|--------|
|        | ee (%) | ee (%) | ee (%) |
| 0      | 96     | 96     | 96     |
| 1      | 96     | 96     | 90     |
| 2      | 96     | 96     | 85     |
| 4      | 96     | 96     | 79     |
| 6      | 96     | 95     | 74     |
| 12     | 96     | 95     | 62     |
| 24     | 96     | 95     | 40     |
| 36     | 96     | 94     | 28     |
| 48     | 96     | 94     | 20     |
| 60     | 95     | 93     | 16     |
| 72     | 96     | 92     | 11     |

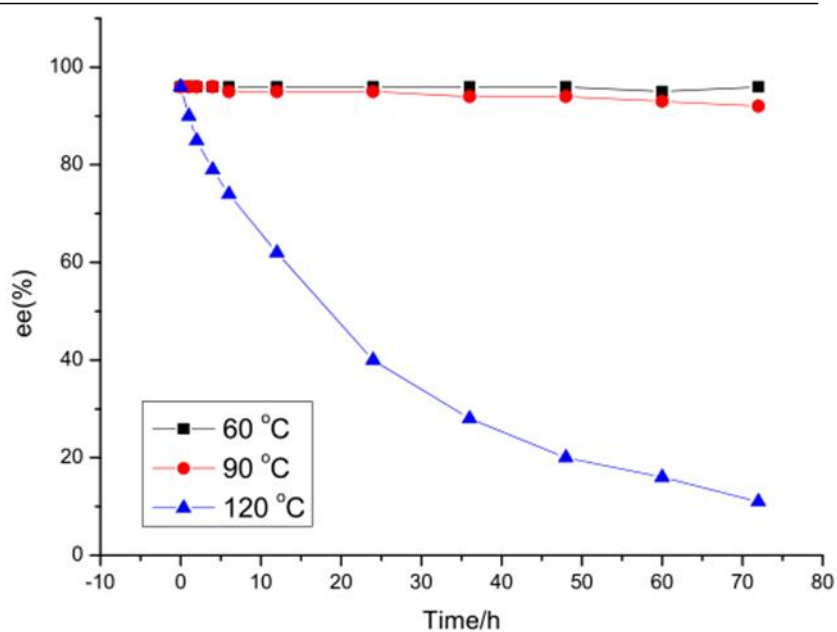

**Figure S1.** Thermal racemization experiments

#### Racemization Kinetics<sup>4</sup>

The variation of the enantiomeric excess (ee) with time was obtained and plotted against time by  $\ln(ee_0/ee)$ , where  $ee_0$  is the initial enantiomeric excess at  $t = 0$ . The

gradient of the obtained graph corresponds to the rate constant of racemization,  $k_{racemization}$ , at that specific temperature. The rate constant for enantiomerization,  $k_{enantiomerization}$ , is related to the racemization rate constant according to the following equation:

$$k_{enantiomerization} = \frac{k_{racemization}}{2}$$

The half-life of racemization at that temperature can be calculated as:

$$t_{\frac{1}{2}racemization} = \frac{\ln 2}{k_{racemization}}$$

The barrier to rotation,  $\Delta G^{\ddagger}_{enantiomerization}$ , was subsequently calculated using the following form of the Eyring equation:

$$\Delta G^{\ddagger}_{enantiomerization} = RT_1 \cdot \ln \frac{k_B T_1}{k_{enantiomerization}}$$

Where: R = Gas constant =  $8.31454 \text{ J}\cdot\text{K}^{-1}\cdot\text{mol}^{-1}$ , h = Planck constant =  $6.62608 \times 10^{-34} \text{ J}\cdot\text{s}$ ,  $k_B$  = Boltzmann constant =  $1.38066 \times 10^{-23} \text{ J}\cdot\text{K}^{-1}$ , and  $T_1$  = temperature racemization studies were conducted at, in Kelvin.

Employing the assumption that the change in entropy is negligible over a short range of temperature, we can assume that  $\Delta G^{\ddagger}$  does not change with temperature. It is thus possible to extrapolate the racemization constant to 25 °C, according to the following relationship:

$$\begin{aligned} k_{racemization \text{ at } 25 \text{ } ^\circ\text{C}} &= 2 k_{enantiomerization \text{ at } 25 \text{ } ^\circ\text{C}} \\ &= 2 \frac{k_B T_2}{h} e^{\left(\frac{-\Delta G^{\ddagger}_{enantiomerization}}{RT_2}\right)} \end{aligned}$$

Where  $T_2 = 298.15 \text{ K}$  (25 °C).

The half-life at 25 °C is calculated as follows:

$$t_{\frac{1}{2}racemization \text{ at } 25 \text{ } ^\circ\text{C}} = \frac{\ln 2}{k_{racemization \text{ at } 25 \text{ } ^\circ\text{C}}}$$

**Table S7.** Detail data of thermal racemization experiment (120 °C)

| time/s | ee% | $\ln(ee_0/ee)$ |
|--------|-----|----------------|
| 0      | 96  | 0              |
| 3600   | 90  | 0.064539       |

|        |    |          |
|--------|----|----------|
| 7200   | 85 | 0.121697 |
| 14400  | 79 | 0.1949   |
| 21600  | 74 | 0.260283 |
| 43200  | 62 | 0.437214 |
| 86400  | 40 | 0.875469 |
| 129600 | 28 | 1.232144 |
| 172800 | 20 | 1.568616 |
| 216000 | 16 | 1.791759 |
| 259200 | 11 | 2.166453 |

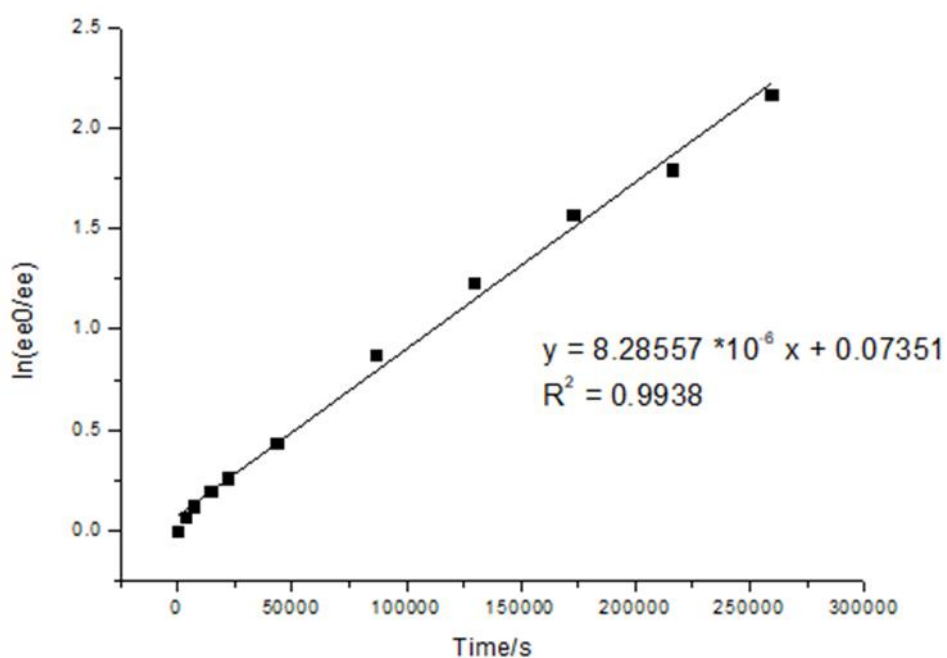

$$t_{\frac{1}{2}}^{\text{racemization at } 120 \text{ } ^\circ\text{C}} = 23 \text{ h.}$$

$$\Delta G^{\ddagger}_{\text{enantiomerization}} = 32.9 \text{ kcal}\cdot\text{mol}^{-1}$$

$$t_{\frac{1}{2}}^{\text{racemization at } 25 \text{ } ^\circ\text{C}} = 2363 \text{ years}$$

According to these results, and a rotation barrier of 18 at 120 °C was calculated as 32.9 kcal•mol<sup>-1</sup> which is slightly lower than that of previous C-C axial naphthyltriazoles (34.6 kcal•mol<sup>-1</sup>). These data indicate that this new heterobiaryls remains good thermal stability at temperatures lower than 100 °C.

## 6. Gram-scale experiment and synthetic applications

### 6.1 Gram-scale experiment

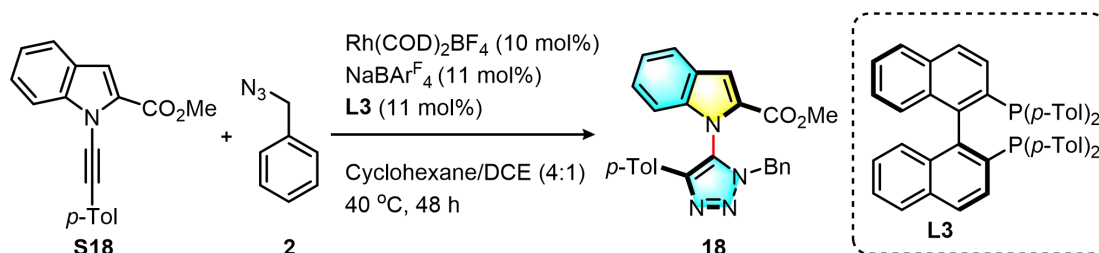

To a solution of alkynyl indole **S18** (868.0 mg, 3.0 mmol, 1.0 equiv.), Rh(COD)<sub>2</sub>BF<sub>4</sub> (134.0 mg, 0.30 mmol, 10 mol%), NaBAR<sup>F</sup><sub>4</sub> (292.5 mg, 0.33 mmol, 11 mol%) and **L3** (224.0 mg, 0.33 mmol, 11 mol%) in dried mixed solvent of cyclohexane (60.0 mL) and DCE (40.0 mL) were added azide **2** (0.75 mL, 6.0 mmol, 2.0 equiv.) by microsyringe under nitrogen atmosphere. The mixture was heated to 40 °C and stirred for 48 h in a water bath. The reaction was monitored by TLC. The mixture was allowed to cool down to the room temperature and concentrated in vacuo. The residue was purified by silica gel (100-200 mesh) column chromatography with petroleum ether/ethyl acetate (5:1) as eluent to get the corresponding triazole **18** (1.06 g, 84% yield, 99:1 er).

### 6.2 Synthesis of **48** via a Grignard reaction

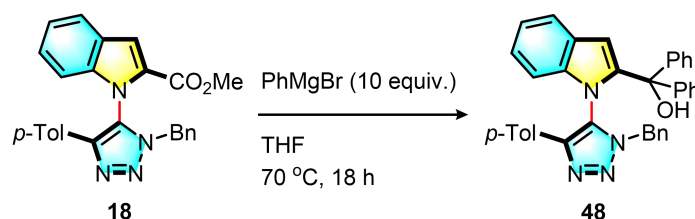

To a solution of **18** (63.4 mg, 0.15 mmol, 1.0 equiv.) in dried THF (1 mL) was added PhMgBr (0.5 mL, 3M in THF, 1.50 mmol, 10 equiv.) dropwise by syringe under nitrogen atmosphere at 0 °C. The mixture was heated to 70 °C and stirred for 18 h. The reaction was monitored by TLC. After the reacts were consumed completely, the reaction was allowed to cool down to the room temperature and quenched by saturated NH<sub>4</sub>Cl solution. The mixture was extracted by ethyl acetate (3 x 10 mL) and

the organic phase was washed with brine. The organic phase was dried by  $\text{Na}_2\text{SO}_4$  and concentrated in vacuo. The residue was purified by silica gel (100-200 mesh) column chromatography with petroleum ether/ethyl acetate (6:1) as the eluent to obtain **48** (62.3 mg, white solid, 76% yield, 95.5:4.5 er).

### 6.3 Synthesis of **49** via a Kulinkovich cyclopropanation

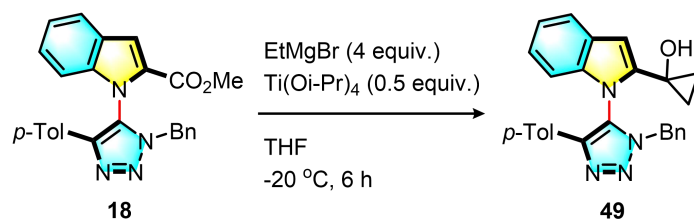

To a solution of **18** (84.5 mg, 0.20 mmol, 1.0 equiv.) in dried THF (1 mL) was added EtMgBr (0.8 mL, 1M in THF, 0.80 mmol, 4 equiv.) dropwise by syringe under nitrogen atmosphere at  $0\text{ }^\circ\text{C}$ . The mixture was cooled down to  $-20\text{ }^\circ\text{C}$  and stirred for 6 h. The reaction was monitored by TLC. After the reacts were consumed completely, the reaction was allowed to warm to the room temperature and quenched by saturated  $\text{NH}_4\text{Cl}$  solution. The mixture was extracted by ethyl acetate (3 x 10 mL) and the organic phase was washed with brine. The organic phase was dried by  $\text{Na}_2\text{SO}_4$  and concentrated in vacuo. The residue was purified by silica gel (100-200 mesh) column chromatography with petroleum ether/ethyl acetate (5:1) as the eluent to obtain **49** (36.2 mg, pale yellow solid, 43% yield, 95.5:4.5 er).

### 6.4 Synthesis of **50** via an amidation

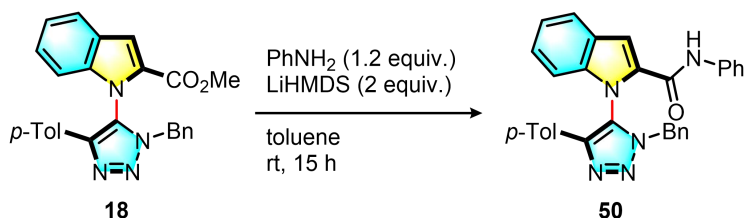

To a solution of **18** (42.2 mg, 0.10 mmol, 1.0 equiv.) in dried toluene (1 mL) were added aniline (11.0  $\mu\text{L}$ , 0.12 mmol, 1.2 equiv.) and LiHMDS (0.20 mL, 2M in THF, 0.20 mmol, 2.0 equiv.) dropwise by syringe under nitrogen atmosphere at the room

temperature. The mixture was stirred for 15 h at the ambient temperature. The reaction was monitored by TLC. After the reacts were consumed completely, the reaction was allowed to warm to the room temperature and quenched by saturated  $\text{NH}_4\text{Cl}$  solution. The mixture was extracted by ethyl acetate (3 x 5 mL) and the organic phase was washed with water and brine. The organic phase was dried by  $\text{Na}_2\text{SO}_4$  and concentrated in vacuo. The residue was purified by silica gel (100-200 mesh) column chromatography with petroleum ether/ethyl acetate (8:1) as the eluent to obtain **50** (37.7 mg, white solid, 78% yield, 98.5:1.5 er).

### 6.5 Synthesis of **51** via an oxidative cyclization

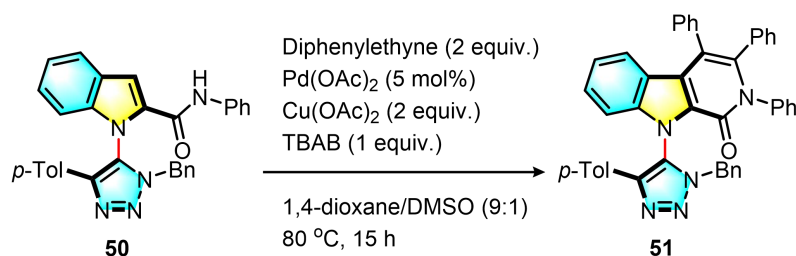

To a solution of **50** (48.4 mg, 0.10 mmol, 1.0 equiv.) and diphenylethyne (35.8 mg, 0.20 mmol, 2.0 equiv.) in a mixed solvent of 1,4-dioxane/DMSO (9:1, 2 mL) were added  $\text{Pd}(\text{OAc})_2$  (1.2 mg, 0.005 mmol, 5 mol%),  $\text{Cu}(\text{OAc})_2$  (39.8 mg, 0.20 mmol, 2.0 equiv.) and TBAB (32.2 mg, 0.10 mmol, 1.0 equiv.). The mixture was heated to 80 °C and stirred for 15 h. The reaction was monitored by TLC. After the reacts were consumed completely, the mixture was filtered on a pad of celite and concentrated in vacuo. The residue was purified by silica gel (100-200 mesh) column chromatography with petroleum ether/ethyl acetate (3:1) as the eluent to obtain **51** (44.2 mg, white solid, 67% yield, 96.5:3.5 er).

### 6.6 Synthesis of **52** via an oxidative iodination

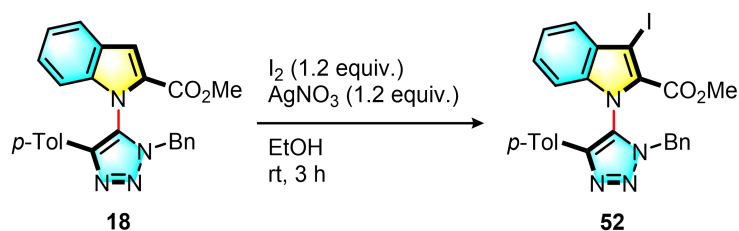

To a solution of **18** (422.5 mg, 1.0 mmol, 1.0 equiv.) in ethanol (1.5 mL) were added iodine (304.6 mg, 1.2 mmol, 1.2 equiv.) and AgNO<sub>3</sub> (203.8 mg, 1.2 mmol, 1.2 equiv.) under air at the room temperature. The mixture was kept in the dark and stirred at the ambient environment for 3 h. The reaction was monitored by NMR. After the reacts were consumed completely, the mixture was poured into saturated Na<sub>2</sub>S<sub>2</sub>O<sub>3</sub> solution and extracted by ethyl acetate (3 x 10 mL), and the organic phase was dried by Na<sub>2</sub>SO<sub>4</sub> and concentrated in vacuo to obtain **52** (537.4 mg, white solid, 98% yield, 98:2 er).

### 6.7 Synthesis of **53** via a Heck coupling reaction

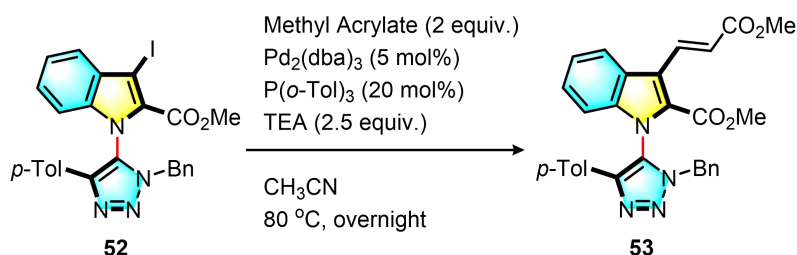

To a solution of **52** (54.8 mg, 0.10 mmol, 1.0 equiv.) in CH<sub>3</sub>CN (1.0 mL) were added methyl acrylate (18.0 μL, 0.20 mmol, 2.0 equiv.), Pd<sub>2</sub>(dba)<sub>3</sub> (4.6 mg, 0.005 mmol, 5 mol%), P(*o*-Tol)<sub>3</sub> (6.1 mg, 0.020 mmol, 20 mol%) and triethylamine (35.0 μL, 0.25 mmol, 2.5 equiv.) under nitrogen atmosphere. The mixture was heated to 80 °C and stirred overnight. The reaction was monitored by TLC. After the reacts were consumed completely, the mixture was poured into water and extracted by dichloromethane (3 x 5 mL). The organic phase was dried by Na<sub>2</sub>SO<sub>4</sub> and concentrated in vacuo. The residue was purified by silica gel (100-200 mesh) column chromatography with petroleum ether/ethyl acetate (8:1) as the eluent to obtain **53** (46.6 mg, white solid, 92% yield, 98:2 er).

## 6.8 Synthesis of **54** via a Suzuki coupling reaction

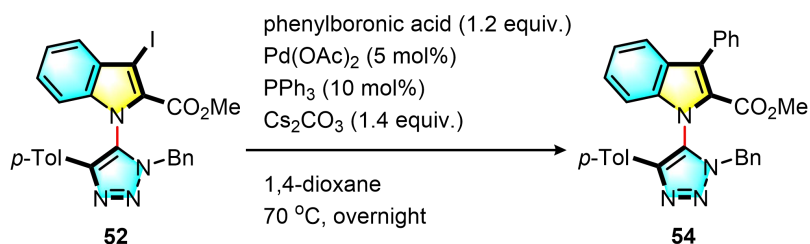

To a solution of **52** (54.8 mg, 0.10 mmol, 1.0 equiv.) and phenylboronic acid (14.7 mg, 0.12 mmol, 1.2 equiv.) in 1,4-dioxane (1.0 mL) were added Pd(OAc)<sub>2</sub> (1.2 mg, 0.005 mmol, 5 mol%), PPh<sub>3</sub> (2.6 mg, 0.010 mmol, 10 mol%) and Cs<sub>2</sub>CO<sub>3</sub> (45.6 mg, 0.14 mmol, 1.4 equiv.) under nitrogen atmosphere. The mixture was heated to 70 °C and stirred overnight. The reaction was monitored by TLC. After the reacts were consumed completely, the mixture was poured into water and extracted by dichloromethane (3 x 5 mL). The organic phase was dried by Na<sub>2</sub>SO<sub>4</sub> and concentrated in vacuo. The residue was purified by silica gel (100-200 mesh) column chromatography with petroleum ether/ethyl acetate (6:1) as the eluent to obtain **54** (46.4 mg, white solid, 93% yield, 98:2 er).

## 6.9 Synthesis of **55** via a Sonogashira coupling reaction

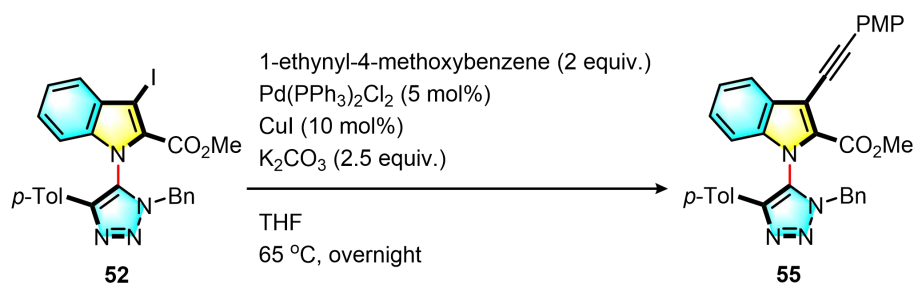

To a solution of **52** (54.8 mg, 0.10 mmol, 1.0 equiv.) and 1-ethynyl-4-methoxybenzene (26.5 mg, 0.20 mmol, 2.0 equiv.) in THF (1.0 mL) were added and Pd(PPh<sub>3</sub>)<sub>2</sub>Cl<sub>2</sub> (3.5 mg, 0.005 mmol, 5 mol%) and CuI (1.9 mg, 0.010 mmol, 10 mol%) and K<sub>2</sub>CO<sub>3</sub> (34.5 mg, 2.5 mmol, 1.4 equiv.) under nitrogen atmosphere. he mixture was heated to 65 °C and stirred overnight. The reaction was monitored by TLC. After the reacts were consumed completely, the mixture was poured into water and extracted by dichloromethane (3 x 5 mL). The organic phase was dried by Na<sub>2</sub>SO<sub>4</sub>



and concentrated in vacuo. The residue was purified by silica gel (100-200 mesh) column chromatography with petroleum ether/ethyl acetate (30:1) as the eluent to obtain **55** (43.6 mg, white solid, 79% yield, 97:3 er).

## 7. X-ray crystallographic data for **13** and **25**

A suitable crystal was selected and analyzed on a Rigaku XtaLAB Synergy diffractometer. The crystal structures have been deposited at The Cambridge Crystallographic Data Centre (CCDC: 2192307 and 2191870). These data can be obtained free of charge from The Cambridge Crystallographic Data Centre via [www.ccdc.com.ac.uk/data\\_request/cif](http://www.ccdc.com.ac.uk/data_request/cif).

### 7.1 X-ray crystallographic data for **13**

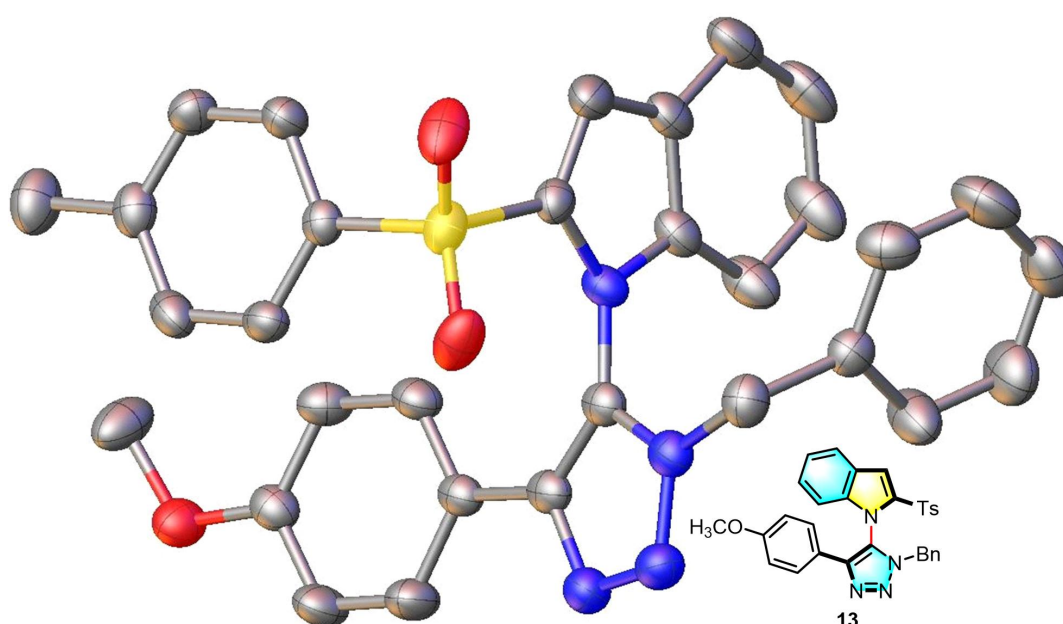

**Figure S2** X-ray crystal structure of **13** (CCDC: 2192307. Thermal ellipsoids are drawn at 50% probability.)

Preparation of the crystal of **13** suitable for XRD analysis: in a tube (diameter, 0.5 cm) was added 40 mg of **13** dissolved by 2 mL dichloromethane, and then 1 mL petroleum ether and 1 mL ethyl acetate was slowly added dropwise. The crystal was recrystallized by evaporation of solvent at room temperature.

---

**Table S8** Crystal data and structure refinement for **13**

---

|                                    |                                                                 |
|------------------------------------|-----------------------------------------------------------------|
| Identification code                | cu_220715C_0m                                                   |
| Empirical formula                  | C <sub>31</sub> H <sub>26</sub> N <sub>4</sub> O <sub>3</sub> S |
| Formula weight                     | 534.62                                                          |
| Temperature/K                      | 173.0                                                           |
| Crystal system                     | orthorhombic                                                    |
| Space group                        | P2 <sub>1</sub> 2 <sub>1</sub> 2 <sub>1</sub>                   |
| a/Å                                | 8.2557(5)                                                       |
| b/Å                                | 14.5568(9)                                                      |
| c/Å                                | 21.8087(12)                                                     |
| α/°                                | 90                                                              |
| β/°                                | 90                                                              |
| γ/°                                | 90                                                              |
| Volume/Å <sup>3</sup>              | 2620.9(3)                                                       |
| Z                                  | 4                                                               |
| ρ <sub>calc</sub> /cm <sup>3</sup> | 1.355                                                           |
| μ/mm <sup>-1</sup>                 | 1.431                                                           |
| F(000)                             | 1120.0                                                          |
| Crystal size/mm <sup>3</sup>       | 0.03 × 0.03 × 0.02                                              |
| Radiation                          | CuKα (λ = 1.54178)                                              |
| 2θ range for data collection/°     | 7.302 to 137.026                                                |
| Index ranges                       | -9 ≤ h ≤ 9, -15 ≤ k ≤ 17, -26 ≤ l ≤ 26                          |
| Reflections collected              | 12512                                                           |
| Independent reflections            | 4693 [R <sub>int</sub> = 0.0404, R <sub>sigma</sub> = 0.0476]   |
| Data/restraints/parameters         | 4693/0/354                                                      |
| Goodness-of-fit on F <sup>2</sup>  | 1.104                                                           |
| Final R indexes [I>=2σ (I)]        | R <sub>1</sub> = 0.0350, wR <sub>2</sub> = 0.0842               |

|                                                |                                  |
|------------------------------------------------|----------------------------------|
| Final R indexes [all data]                     | $R_1 = 0.0400$ , $wR_2 = 0.0878$ |
| Largest diff. peak/hole / $e \text{ \AA}^{-3}$ | 0.33/-0.28                       |
| Flack parameter                                | 0.020(9)                         |

## 7.2 X-ray crystallographic data for **25**

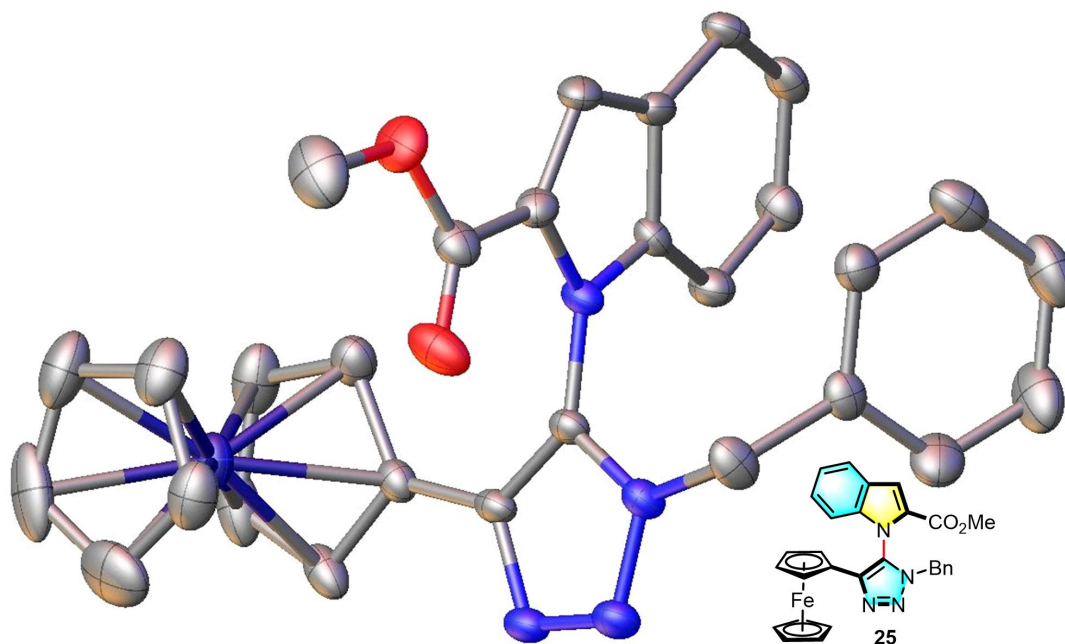

**Figure S3** X-ray crystal structure of **25** (CCDC: 2191870. Thermal ellipsoids are drawn at 50% probability.)

Preparation of the crystal of **25** suitable for XRD analysis: in a tube (diameter, 0.5 cm) was added 50 mg of **25** dissolved by 0.5 mL chloroform, and then 3 mL petroleum ether was slowly added dropwise. The crystal was recrystallized by evaporation of solvent at room temperature.

**Table S9** Crystal data and structure refinement for **25**

|                     |                                                                 |
|---------------------|-----------------------------------------------------------------|
| Identification code | cu_220621e_0m                                                   |
| Empirical formula   | C <sub>29</sub> H <sub>24</sub> FeN <sub>4</sub> O <sub>2</sub> |

|                                             |                                                               |
|---------------------------------------------|---------------------------------------------------------------|
| Formula weight                              | 516.37                                                        |
| Temperature/K                               | 173.0                                                         |
| Crystal system                              | monoclinic                                                    |
| Space group                                 | P2 <sub>1</sub>                                               |
| a/Å                                         | 10.5500(9)                                                    |
| b/Å                                         | 10.0510(8)                                                    |
| c/Å                                         | 12.1412(10)                                                   |
| α/°                                         | 90                                                            |
| β/°                                         | 109.660(4)                                                    |
| γ/°                                         | 90                                                            |
| Volume/Å <sup>3</sup>                       | 1212.38(18)                                                   |
| Z                                           | 2                                                             |
| ρ <sub>calc</sub> /cm <sup>3</sup>          | 1.414                                                         |
| μ/mm <sup>-1</sup>                          | 5.266                                                         |
| F(000)                                      | 536.0                                                         |
| Crystal size/mm <sup>3</sup>                | 0.05 × 0.04 × 0.03                                            |
| Radiation                                   | CuKα (λ = 1.54178)                                            |
| 2θ range for data collection/°              | 7.732 to 133.284                                              |
| Index ranges                                | -12 ≤ h ≤ 12, -11 ≤ k ≤ 11, -14 ≤ l ≤ 14                      |
| Reflections collected                       | 10500                                                         |
| Independent reflections                     | 3544 [R <sub>int</sub> = 0.0443, R <sub>sigma</sub> = 0.0588] |
| Data/restraints/parameters                  | 3544/1/327                                                    |
| Goodness-of-fit on F <sup>2</sup>           | 1.011                                                         |
| Final R indexes [I ≥ 2σ (I)]                | R <sub>1</sub> = 0.0299, wR <sub>2</sub> = 0.0688             |
| Final R indexes [all data]                  | R <sub>1</sub> = 0.0399, wR <sub>2</sub> = 0.0706             |
| Largest diff. peak/hole / e Å <sup>-3</sup> | 0.18/-0.34                                                    |
| Flack parameter                             | 0.026(6)                                                      |

---

## 8. Characterization of Products 3-57

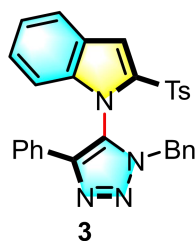

White solid, 46.8 mg, 93% yield, 95:5 er. [Chiral HPLC analysis of the product: Daicel Chiralpak AS-H 250X4.6 mm 5u column; *n*-hexane/2-propanol = 90/10, flow rate = 1.0 mL/min,  $\lambda$  = 254 nm, *t* (major) = 33.50 min, *t* (minor) = 22.89 min].  $[\alpha]_D^{24} = -21.1^\circ$  (*c* = 1.0, CHCl<sub>3</sub>). **<sup>1</sup>H NMR (500 MHz, CDCl<sub>3</sub>)**  $\delta$  7.78 (s, 1H), 7.72 (d, *J* = 8.1 Hz, 1H), 7.28 (d, *J* = 8.9 Hz, 3H), 7.15 (t, *J* = 7.5 Hz, 1H), 7.03-6.99 (m, 2H), 6.96-6.85 (m, 7H), 6.75 (dd, *J* = 19.0, 7.8 Hz, 4H), 6.11 (d, *J* = 8.4 Hz, 1H), 5.79 (d, *J* = 15.0 Hz, 1H), 5.28 (d, *J* = 15.0 Hz, 1H), 2.04 (s, 3H). **<sup>13</sup>C NMR (126 MHz, CDCl<sub>3</sub>)**  $\delta$  145.0, 142.6, 139.6, 135.9, 135.7, 133.4, 129.6, 128.6, 128.5, 128.5, 128.4, 128.1, 128.0, 127.9, 127.2, 125.7, 125.4, 124.7, 122.9, 122.9, 114.4, 111.0, 53.2, 21.6. **HRMS (ESI, *m/z*)** Calcd for C<sub>30</sub>H<sub>25</sub>N<sub>4</sub>O<sub>2</sub>S (M+H)<sup>+</sup>: 505.1693; Found: 505.1683.

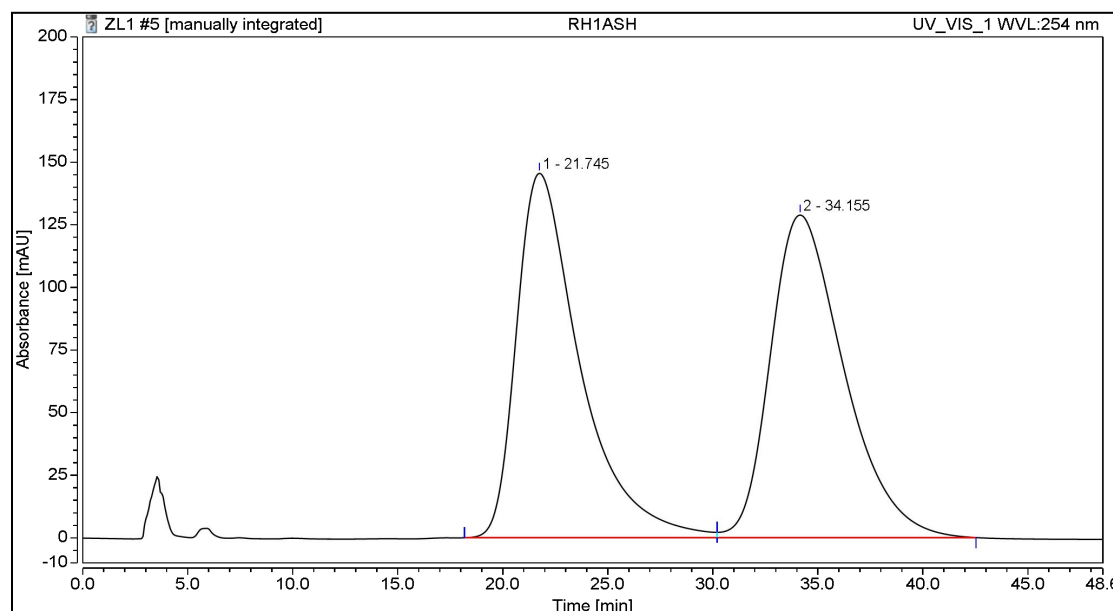

| Integration Results |           |                       |                 |                |                    |                      |
|---------------------|-----------|-----------------------|-----------------|----------------|--------------------|----------------------|
| No.                 | Peak Name | Retention Time<br>min | Area<br>mAU*min | Height<br>mAU  | Relative Area<br>% | Relative Height<br>% |
| 1                   |           | 21.745                | 510.149         | 145.506        | 49.39              | 53.05                |
| 2                   |           | 34.155                | 522.829         | 128.800        | 50.61              | 46.95                |
| <b>Total:</b>       |           |                       | <b>1032.978</b> | <b>274.306</b> | <b>100.00</b>      | <b>100.00</b>        |

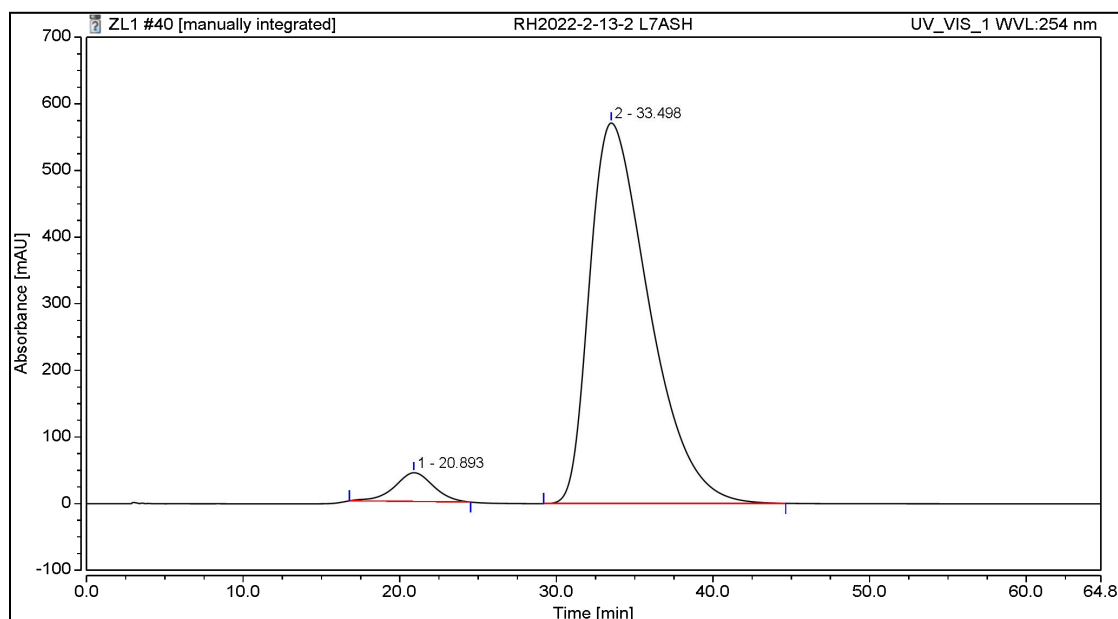

| Integration Results |           |                       |                 |                |                    |                      |
|---------------------|-----------|-----------------------|-----------------|----------------|--------------------|----------------------|
| No.                 | Peak Name | Retention Time<br>min | Area<br>mAU*min | Height<br>mAU  | Relative Area<br>% | Relative Height<br>% |
| 1                   |           | 20.893                | 124.289         | 43.156         | 4.71               | 7.02                 |
| 2                   |           | 33.498                | 2515.127        | 571.339        | 95.29              | 92.98                |
| <b>Total:</b>       |           |                       | <b>2639.416</b> | <b>614.495</b> | <b>100.00</b>      | <b>100.00</b>        |

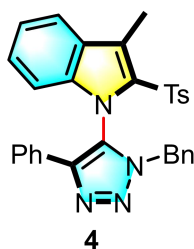

White solid, 42.9 mg, 83% yield, 95:5 er. [Chiral HPLC analysis of the product: Daicel Chiralpak AS-H 250X4.6 mm 5u column; *n*-hexane/2-propanol = 95/5, flow rate = 1.0 mL/min,  $\lambda = 254$  nm,  $t$  (major) = 12.41 min,  $t$  (minor) = 24.15 min].  $[\alpha]_D^{25} = -71.2^\circ$  ( $c = 0.7$ ,  $\text{CHCl}_3$ ).  **$^1\text{H NMR}$  (500 MHz,  $\text{CDCl}_3$ )**  $\delta$  7.69 (d,  $J = 8.1$  Hz, 1H), 7.27-7.23 (m, 2H), 7.14 (t,  $J = 7.4$  Hz, 1H), 7.04-6.85 (m, 9H), 6.77 (dd,  $J = 17.4, 8.3$  Hz, 4H), 6.12 (d,  $J = 8.4$  Hz, 1H), 5.74 (d,  $J = 15.0$  Hz, 1H), 5.24 (d,  $J = 15.0$  Hz, 1H), 2.93 (s, 3H), 2.06 (s, 3H).  **$^{13}\text{C NMR}$  (126 MHz,  $\text{CDCl}_3$ )**  $\delta$  144.6, 142.4, 138.4, 137.4, 133.6, 130.4, 129.5, 128.9, 128.5, 128.5, 128.4, 128.1, 127.8, 127.6, 127.5, 127.2, 126.6, 124.9, 124.8, 122.3, 121.0, 111.0, 53.0, 21.5, 10.3. **HRMS (ESI,  $m/z$ )** Calcd for  $\text{C}_{31}\text{H}_{27}\text{N}_4\text{O}_2\text{S}$  ( $\text{M}+\text{H}$ ) $^+$ : 519.1849; Found: 519.1863.

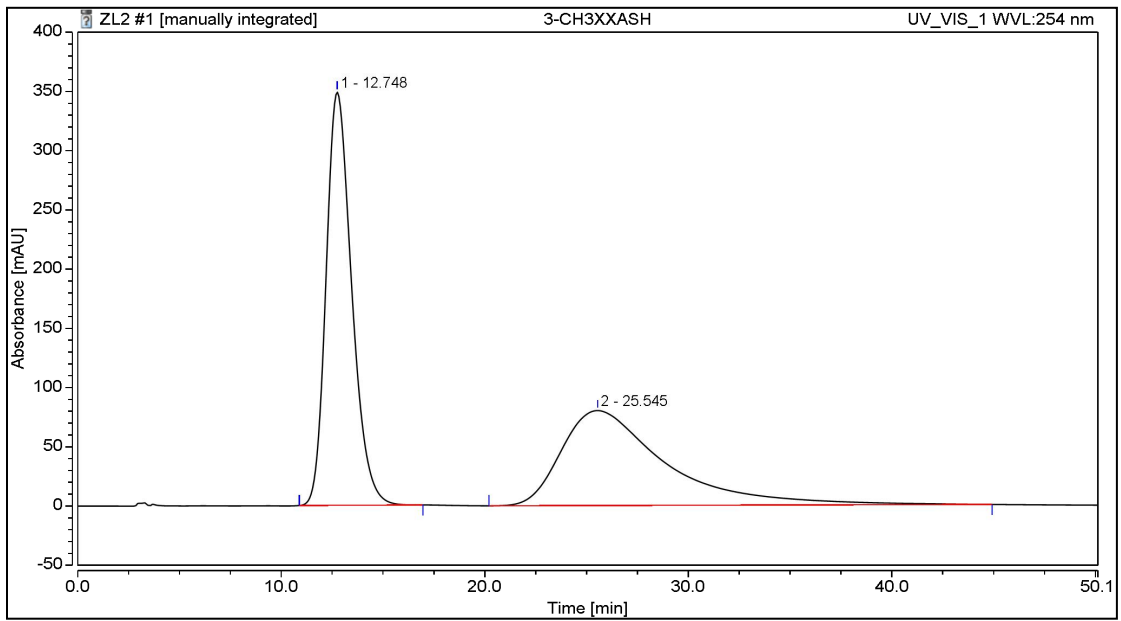

| Integration Results |           |                       |                 |                |                    |                      |
|---------------------|-----------|-----------------------|-----------------|----------------|--------------------|----------------------|
| No.                 | Peak Name | Retention Time<br>min | Area<br>mAU*min | Height<br>mAU  | Relative Area<br>% | Relative Height<br>% |
| 1                   |           | 12.748                | 508.948         | 348.933        | 51.77              | 81.31                |
| 2                   |           | 25.545                | 474.240         | 80.218         | 48.23              | 18.69                |
| <b>Total:</b>       |           |                       | <b>983.188</b>  | <b>429.151</b> | <b>100.00</b>      | <b>100.00</b>        |

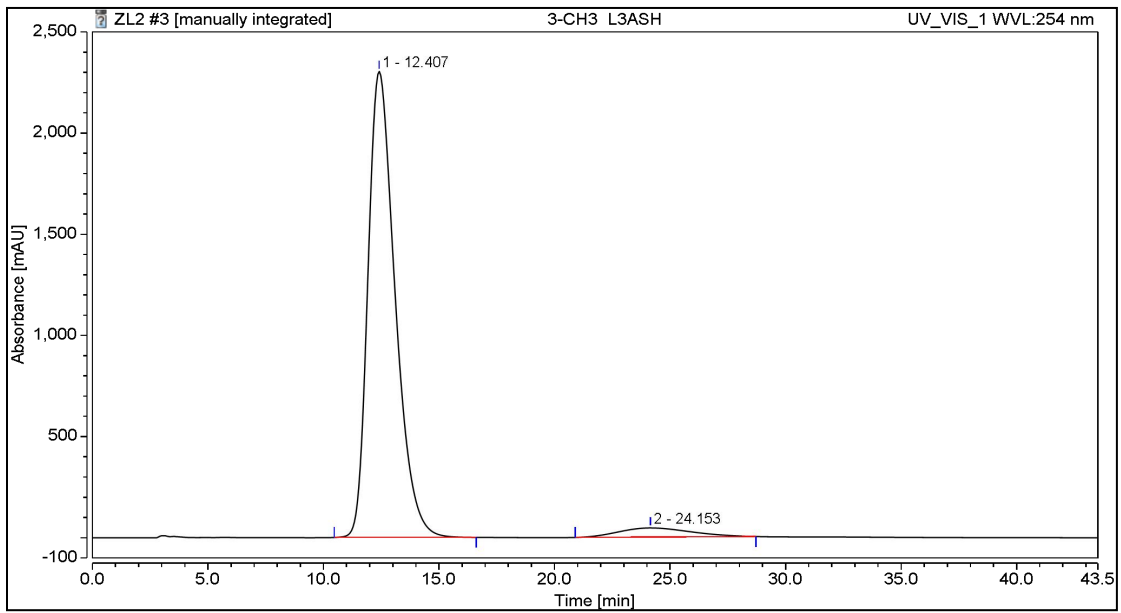

| Integration Results |           |                       |                 |                 |                    |                      |
|---------------------|-----------|-----------------------|-----------------|-----------------|--------------------|----------------------|
| No.                 | Peak Name | Retention Time<br>min | Area<br>mAU*min | Height<br>mAU   | Relative Area<br>% | Relative Height<br>% |
| 1                   |           | 12.407                | 3133.689        | 2303.978        | 95.04              | 98.08                |
| 2                   |           | 24.153                | 163.374         | 45.093          | 4.96               | 1.92                 |
| <b>Total:</b>       |           |                       | <b>3297.063</b> | <b>2349.072</b> | <b>100.00</b>      | <b>100.00</b>        |



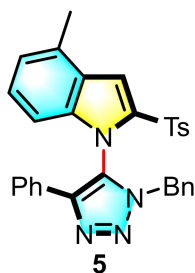

White solid, 38.3 mg, 74% yield, 94:6 er. [Chiral HPLC analysis of the product: Daicel Chiralpak AS-H 250X4.6 mm 5u column; *n*-hexane/2-propanol = 95/5, flow rate = 1.0 mL/min,  $\lambda = 254$  nm,  $t$  (major) = 33.90 min,  $t$  (minor) = 25.22 min].  $[\alpha]_D^{26} = -14.3^\circ$  ( $c = 0.8$ ,  $\text{CHCl}_3$ ).  **$^1\text{H NMR}$  (500 MHz,  $\text{CDCl}_3$ )**  $\delta$  7.81 (s, 1H), 7.28 (d,  $J = 8.3$  Hz, 2H), 7.05-6.92 (m, 5H), 6.91-6.81 (m, 5H), 6.76 (t,  $J = 8.3$  Hz, 4H), 5.98 (d,  $J = 8.4$  Hz, 1H), 5.74 (d,  $J = 15.0$  Hz, 1H), 5.23 (d,  $J = 15.0$  Hz, 1H), 2.64 (s, 3H), 2.05 (s, 3H).  **$^{13}\text{C NMR}$  (126 MHz,  $\text{CDCl}_3$ )**  $\delta$  144.9, 142.5, 139.7, 135.9, 135.3, 133.5, 132.8, 129.6, 128.6, 128.5, 128.4, 128.1, 128.0, 127.9, 127.5, 125.9, 125.6, 124.8, 123.1, 113.1, 108.6, 53.1, 21.5, 18.6. **HRMS (ESI,  $m/z$ )** Calcd for  $\text{C}_{31}\text{H}_{27}\text{N}_4\text{O}_2\text{S}$  ( $\text{M}+\text{H}$ ) $^+$ : 519.1849; Found: 519.1864.

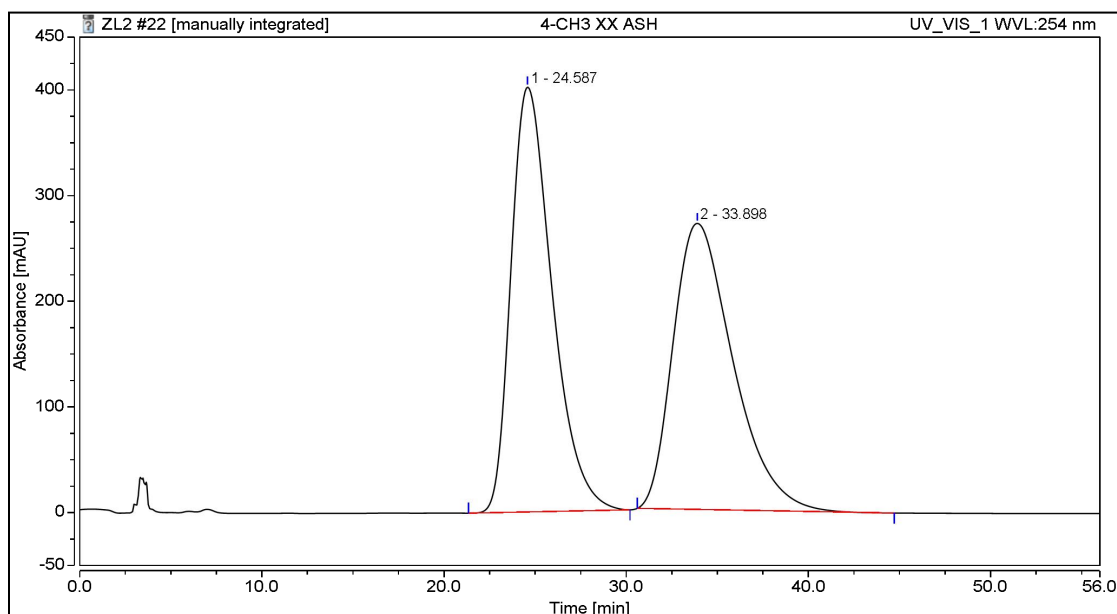

| Integration Results |           |                       |                 |                |                    |                      |
|---------------------|-----------|-----------------------|-----------------|----------------|--------------------|----------------------|
| No.                 | Peak Name | Retention Time<br>min | Area<br>mAU*min | Height<br>mAU  | Relative Area<br>% | Relative Height<br>% |
| 1                   |           | 24.587                | 1048.879        | 402.066        | 50.42              | 59.76                |
| 2                   |           | 33.898                | 1031.457        | 270.719        | 49.58              | 40.24                |
| <b>Total:</b>       |           |                       | <b>2080.337</b> | <b>672.785</b> | <b>100.00</b>      | <b>100.00</b>        |

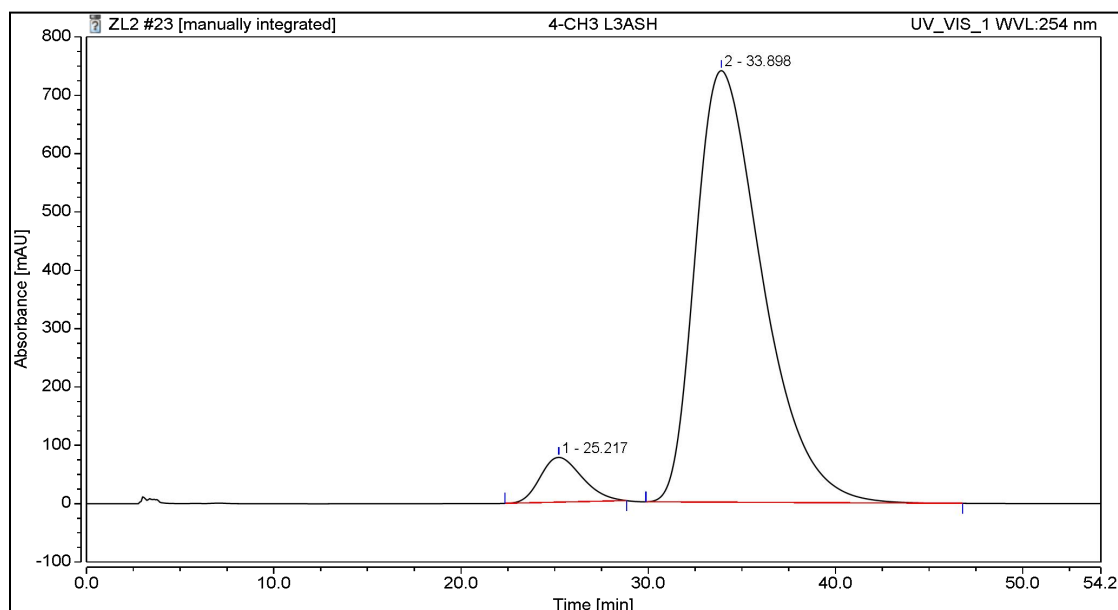

| Integration Results |           |                       |                 |                |                    |                      |
|---------------------|-----------|-----------------------|-----------------|----------------|--------------------|----------------------|
| No.                 | Peak Name | Retention Time<br>min | Area<br>mAU*min | Height<br>mAU  | Relative Area<br>% | Relative Height<br>% |
| 1                   |           | 25.217                | 198.613         | 76.747         | 6.07               | 9.40                 |
| 2                   |           | 33.898                | 3076.101        | 739.744        | 93.93              | 90.60                |
| <b>Total:</b>       |           |                       | <b>3274.714</b> | <b>816.491</b> | <b>100.00</b>      | <b>100.00</b>        |

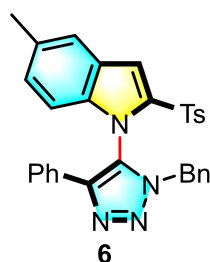

White solid, 45.1 mg, 87% yield, 94.5:5.5 er. [Chiral HPLC analysis of the product: Daicel Chiralpak AS-H 250X4.6 mm 5u column; *n*-hexane/2-propanol = 90/10, flow rate = 1.0 mL/min,  $\lambda = 254$  nm,  $t$  (major) = 32.11 min,  $t$  (minor) = 15.90 min].  $[\alpha]_D^{26} = -47.3^\circ$  ( $c = 0.9$ ,  $\text{CHCl}_3$ ).  **$^1\text{H NMR}$  (500 MHz,  $\text{CDCl}_3$ )**  $\delta$  7.69 (s, 1H), 7.49 (s, 1H), 7.26 (d,  $J = 8.2$  Hz, 2H), 7.06-6.96 (m, 4H), 6.90-6.85 (m, 4H), 6.75 (dd,  $J = 12.3, 8.2$  Hz, 5H), 6.04 (d,  $J = 8.5$  Hz, 1H), 5.75 (d,  $J = 15.0$  Hz, 1H), 5.25 (d,  $J = 15.0$  Hz, 1H), 2.38 (s, 3H), 2.04 (s, 3H).  **$^{13}\text{C NMR}$  (126 MHz,  $\text{CDCl}_3$ )**  $\delta$  144.9, 142.6, 138.2, 136.0, 135.9, 133.6, 132.6, 129.6, 129.1, 128.7, 128.6, 128.5, 128.4, 128.1, 128.0, 127.9, 125.949, 125.8, 124.8, 122.3, 114.1, 110.8, 53.1, 21.5, 21.4. **HRMS (ESI,  $m/z$ )** Calcd for  $\text{C}_{31}\text{H}_{27}\text{N}_4\text{O}_2\text{S}$  ( $\text{M}+\text{H}$ ) $^+$ : 519.1849; Found: 519.1853.

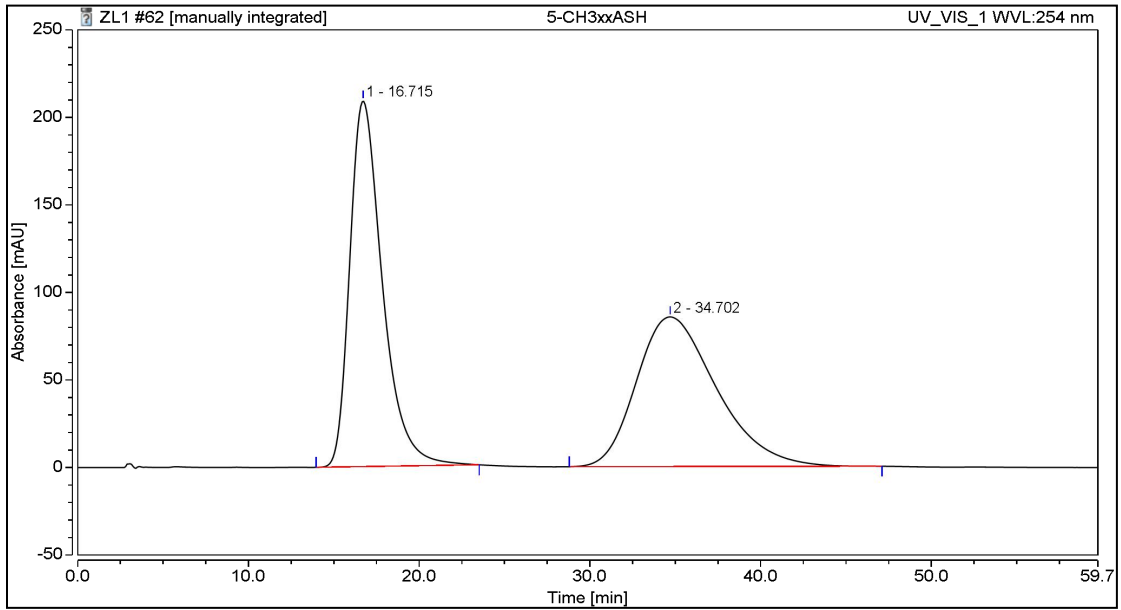

| Integration Results |           |                       |                 |                |                    |                      |
|---------------------|-----------|-----------------------|-----------------|----------------|--------------------|----------------------|
| No.                 | Peak Name | Retention Time<br>min | Area<br>mAU*min | Height<br>mAU  | Relative Area<br>% | Relative Height<br>% |
| 1                   |           | 16.715                | 462.910         | 208.894        | 49.93              | 70.95                |
| 2                   |           | 34.702                | 464.197         | 85.522         | 50.07              | 29.05                |
| <b>Total:</b>       |           |                       | <b>927.107</b>  | <b>294.416</b> | <b>100.00</b>      | <b>100.00</b>        |

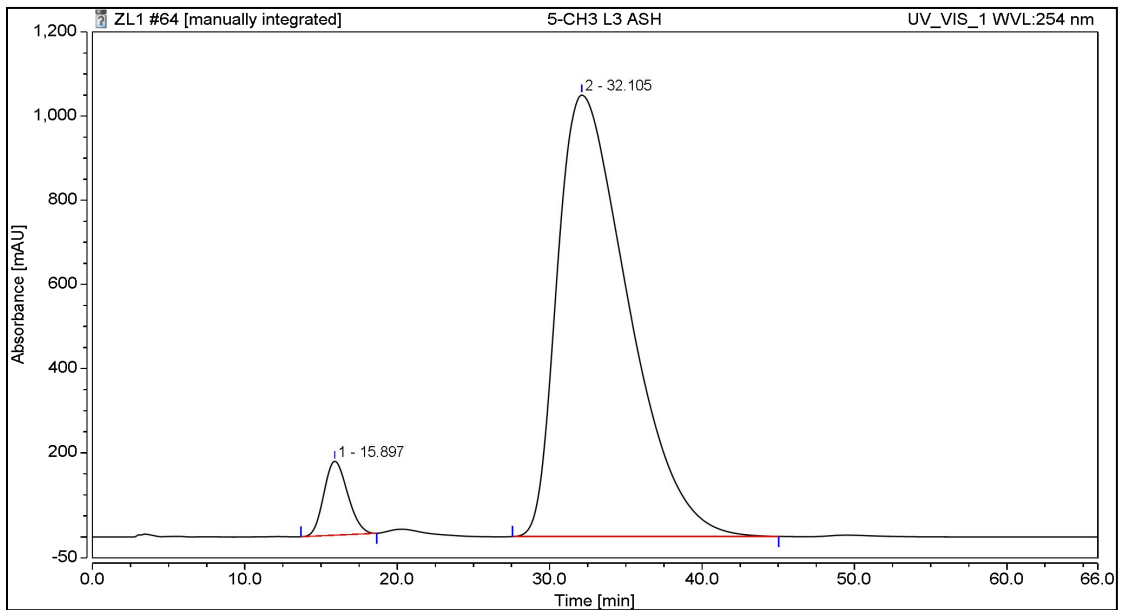

| Integration Results |           |                       |                 |                 |                    |                      |
|---------------------|-----------|-----------------------|-----------------|-----------------|--------------------|----------------------|
| No.                 | Peak Name | Retention Time<br>min | Area<br>mAU*min | Height<br>mAU   | Relative Area<br>% | Relative Height<br>% |
| 1                   |           | 15.897                | 318.701         | 175.885         | 5.34               | 14.36                |
| 2                   |           | 32.105                | 5649.173        | 1049.148        | 94.66              | 85.64                |
| <b>Total:</b>       |           |                       | <b>5967.874</b> | <b>1225.033</b> | <b>100.00</b>      | <b>100.00</b>        |

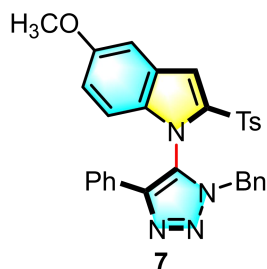

White solid, 38.9 mg, 73% yield, 90.5:9.5 er. [Chiral HPLC analysis of the product: Daicel Chiralpak AS-H 250X4.6 mm 5u column; *n*-hexane/2-propanol = 60/40, flow rate = 1.0 mL/min,  $\lambda$  = 254 nm, *t* (major) = 27.62 min, *t* (minor) = 8.51 min].  $[\alpha]_D^{26} = -16.4^\circ$  (*c* = 0.7, CHCl<sub>3</sub>). **<sup>1</sup>H NMR (500 MHz, CDCl<sub>3</sub>)**  $\delta$  7.68 (s, 1H), 7.26 (d, *J* = 8.5 Hz, 2H), 7.10 (d, *J* = 2.4 Hz, 1H), 7.06 (t, *J* = 7.4 Hz, 1H), 7.02-7.00 (m, 3H), 6.92-6.84 (m, 4H), 6.74 (dd, *J* = 22.8, 8.3 Hz, 4H), 6.57 (dd, *J* = 9.1, 2.4 Hz, 1H), 6.00 (d, *J* = 9.1 Hz, 1H), 5.77 (d, *J* = 15.0 Hz, 1H), 5.28 (d, *J* = 15.0 Hz, 1H), 3.83 (s, 3H), 2.04 (s, 3H). **<sup>13</sup>C NMR (126 MHz, CDCl<sub>3</sub>)**  $\delta$  156.2, 144.9, 142.6, 136.2, 135.9, 134.8, 133.6, 129.6, 128.6, 128.6, 128.5, 128.5, 128.1, 128.0, 127.9, 126.1, 125.8, 124.8, 118.4, 114.0, 112.0, 103.3, 55.9, 53.1, 21.5. **HRMS (ESI, *m/z*)** Calcd for C<sub>31</sub>H<sub>27</sub>N<sub>4</sub>O<sub>3</sub>S (M+H)<sup>+</sup>: 535.1798; Found: 535.1813.

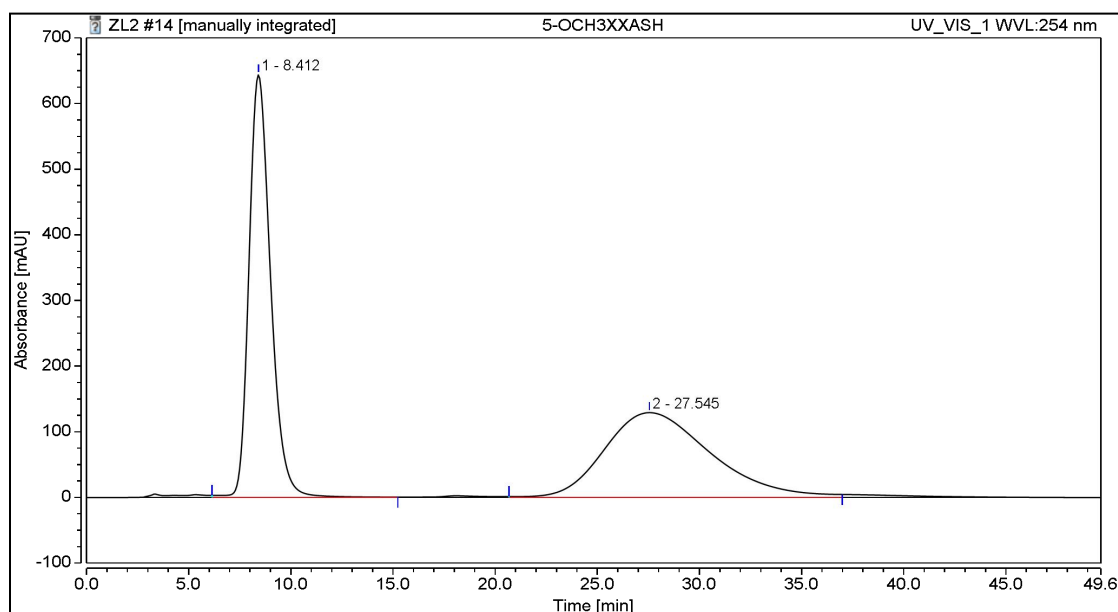

| Integration Results |           |                       |                 |                |                    |                      |
|---------------------|-----------|-----------------------|-----------------|----------------|--------------------|----------------------|
| No.                 | Peak Name | Retention Time<br>min | Area<br>mAU*min | Height<br>mAU  | Relative Area<br>% | Relative Height<br>% |
| 1                   |           | 8.412                 | 791.281         | 644.023        | 50.30              | 83.27                |
| 2                   |           | 27.545                | 781.919         | 129.393        | 49.70              | 16.73                |
| <b>Total:</b>       |           |                       | <b>1573.200</b> | <b>773.416</b> | <b>100.00</b>      | <b>100.00</b>        |

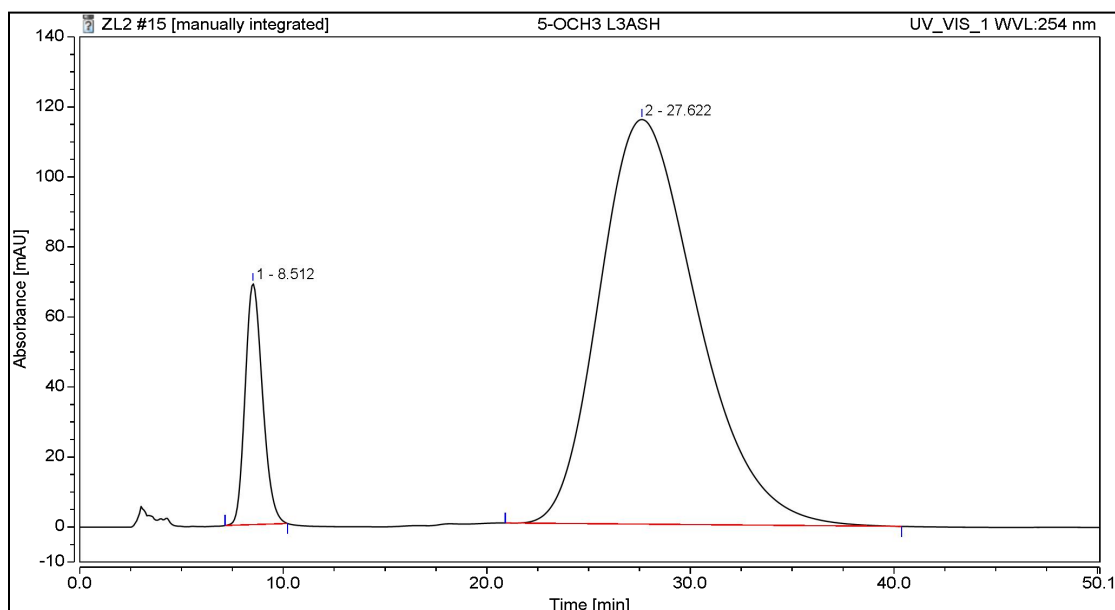

| Integration Results |           |                       |                 |                |                    |                      |
|---------------------|-----------|-----------------------|-----------------|----------------|--------------------|----------------------|
| No.                 | Peak Name | Retention Time<br>min | Area<br>mAU*min | Height<br>mAU  | Relative Area<br>% | Relative Height<br>% |
| 1                   |           | 8.512                 | 68.387          | 68.854         | 9.58               | 37.33                |
| 2                   |           | 27.622                | 645.248         | 115.589        | 90.42              | 62.67                |
| <b>Total:</b>       |           |                       | <b>713.636</b>  | <b>184.442</b> | <b>100.00</b>      | <b>100.00</b>        |

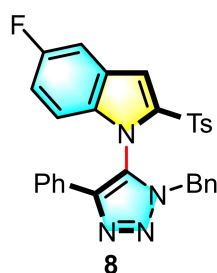

White solid, 39.6 mg, 76% yield, 94.5:5.5 er. [Chiral HPLC analysis of the product: Daicel Chiralpak AS-H 250X4.6 mm 5u column; *n*-hexane/2-propanol = 90/10, flow rate = 1.0 mL/min,  $\lambda = 254$  nm,  $t$  (major) = 32.81 min,  $t$  (minor) = 16.74 min].  $[\alpha]_D^{26} = -43.5^\circ$  ( $c = 0.9$ ,  $\text{CHCl}_3$ ).  **$^1\text{H NMR}$  (500 MHz,  $\text{CDCl}_3$ )**  $\delta$  7.72 (s, 1H), 7.35 (dd,  $J = 8.5, 2.4$  Hz, 1H), 7.27 (d,  $J = 8.5$  Hz, 2H), 7.05 - 7.00 (m, 2H), 6.96 (t,  $J = 7.6$  Hz, 2H), 6.89 - 6.86 (m, 4H), 6.78 (d,  $J = 8.2$  Hz, 2H), 6.71 (d,  $J = 9.0$  Hz, 2H), 6.64 (td,  $J = 9.0, 2.4$  Hz, 1H), 6.01 (dd,  $J = 9.1, 4.1$  Hz, 1H), 5.81 (d,  $J = 15.0$  Hz, 1H), 5.30 (d,  $J = 15.0$  Hz, 1H), 2.05 (s, 3H).  **$^{13}\text{C NMR}$  (126 MHz,  $\text{CDCl}_3$ )**  $\delta$  160.1, 158.2, 145.2, 142.7, 137.7, 136.0, 135.5, 133.4, 129.7, 128.7, 128.6, 128.4, 128.4, 128.2, 128.0, 125.9, 125.8, 125.5, 124.7, 116.3, 116.0, 113.9, 113.8, 112.3, 112.2, 107.7, 107.5, 53.3, 21.5.  **$^{19}\text{F NMR}$  (471 MHz,**

$\text{CDCl}_3$   $\delta$  -119.57. HRMS (ESI, m/z) Calcd for  $\text{C}_{30}\text{H}_{24}\text{FN}_4\text{O}_2\text{S}$  (M+H)<sup>+</sup>: 523.1599; Found: 523.1612.

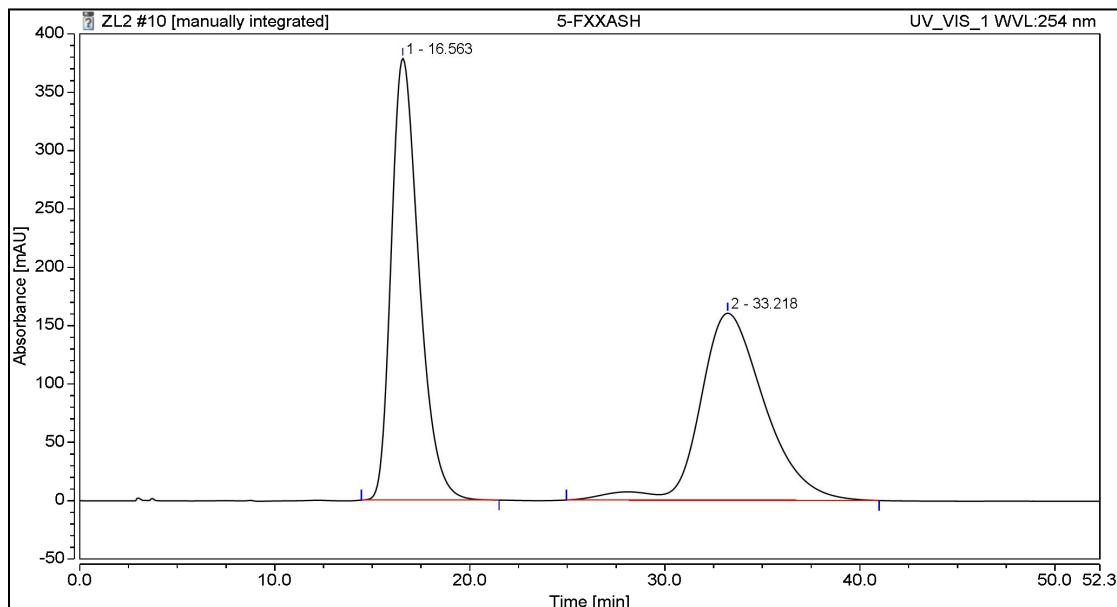

| Integration Results |           |                    |                 |                |                 |                   |
|---------------------|-----------|--------------------|-----------------|----------------|-----------------|-------------------|
| No.                 | Peak Name | Retention Time min | Area mAU*min    | Height mAU     | Relative Area % | Relative Height % |
| 1                   |           | 16.563             | 625.068         | 378.632        | 50.45           | 70.25             |
| 2                   |           | 33.218             | 613.929         | 160.318        | 49.55           | 29.75             |
| <b>Total:</b>       |           |                    | <b>1238.997</b> | <b>538.951</b> | <b>100.00</b>   | <b>100.00</b>     |

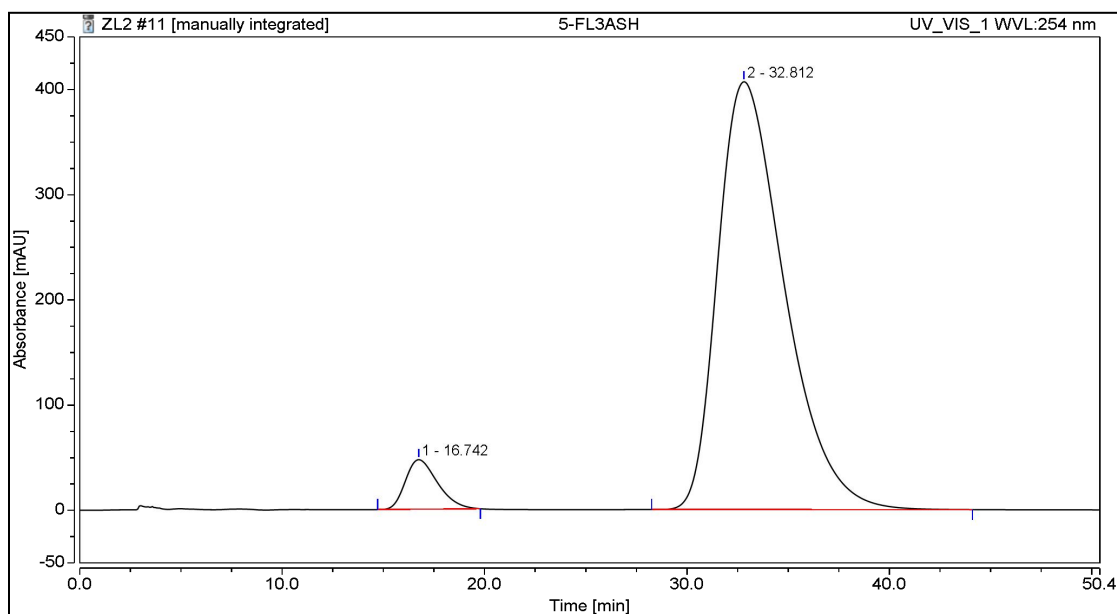

| Integration Results |           |                    |                 |                |                 |                   |
|---------------------|-----------|--------------------|-----------------|----------------|-----------------|-------------------|
| No.                 | Peak Name | Retention Time min | Area mAU*min    | Height mAU     | Relative Area % | Relative Height % |
| 1                   |           | 16.742             | 86.736          | 47.162         | 5.29            | 10.39             |
| 2                   |           | 32.812             | 1552.392        | 406.777        | 94.71           | 89.61             |
| <b>Total:</b>       |           |                    | <b>1639.128</b> | <b>453.939</b> | <b>100.00</b>   | <b>100.00</b>     |

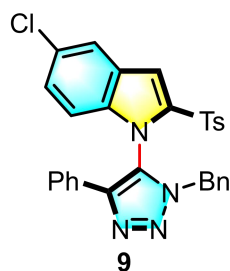

White solid, 47.3 mg, 88% yield, 94.5:5.5 er. [Chiral HPLC analysis of the product: Daicel Chiralpak AS-H 250X4.6 mm 5u column; *n*-hexane/2-propanol = 90/10, flow rate = 1.0 mL/min,  $\lambda$  = 254 nm, *t* (major) = 28.18 min, *t* (minor) = 15.55 min].  $[\alpha]_D^{27} = -29.2^\circ$  (*c* = 0.8, CHCl<sub>3</sub>). **<sup>1</sup>H NMR (500 MHz, CDCl<sub>3</sub>)**  $\delta$  7.72-7.67 (m, 2H), 7.28-7.25 (m, 2H), 7.03 (dt, *J* = 15.0, 7.4 Hz, 2H), 6.96 (t, *J* = 7.6 Hz, 2H), 6.91-6.82 (m, 5H), 6.78 (d, *J* = 8.2 Hz, 2H), 6.70 (d, *J* = 7.4 Hz, 2H), 6.00 (d, *J* = 8.9 Hz, 1H), 5.81 (d, *J* = 15.0 Hz, 1H), 5.29 (d, *J* = 15.0 Hz, 1H), 2.05 (s, 3H). **<sup>13</sup>C NMR (126 MHz, CDCl<sub>3</sub>)**  $\delta$  145.3, 142.8, 137.9, 137.5, 135.4, 133.4, 129.7, 128.8, 128.7, 128.6, 128.4, 128.4, 128.2, 128.0, 127.6, 126.4, 125.3, 124.7, 122.2, 113.4, 112.2, 53.4, 21.5. **HRMS (ESI, *m/z*)** Calcd for C<sub>30</sub>H<sub>24</sub>ClN<sub>4</sub>O<sub>2</sub>S (M+H)<sup>+</sup>: 539.1303; Found: 539.1300.

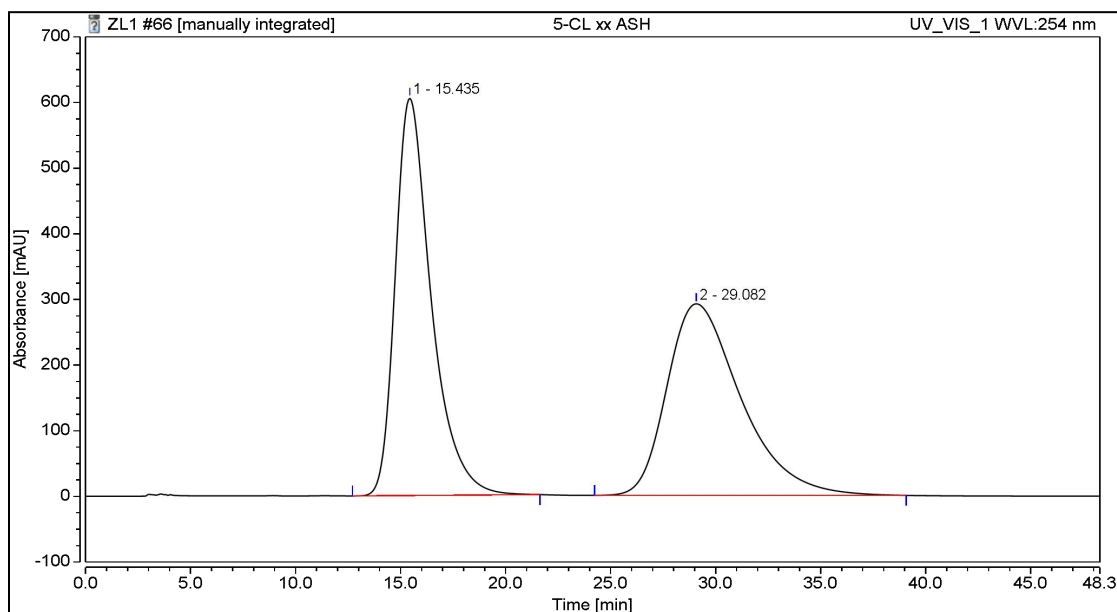

| Integration Results |           |                       |                 |                |                    |                      |
|---------------------|-----------|-----------------------|-----------------|----------------|--------------------|----------------------|
| No.                 | Peak Name | Retention Time<br>min | Area<br>mAU*min | Height<br>mAU  | Relative Area<br>% | Relative Height<br>% |
| 1                   |           | 15.435                | 1202.491        | 605.186        | 50.26              | 67.47                |
| 2                   |           | 29.082                | 1190.210        | 291.804        | 49.74              | 32.53                |
| <b>Total:</b>       |           |                       | <b>2392.701</b> | <b>896.991</b> | <b>100.00</b>      | <b>100.00</b>        |

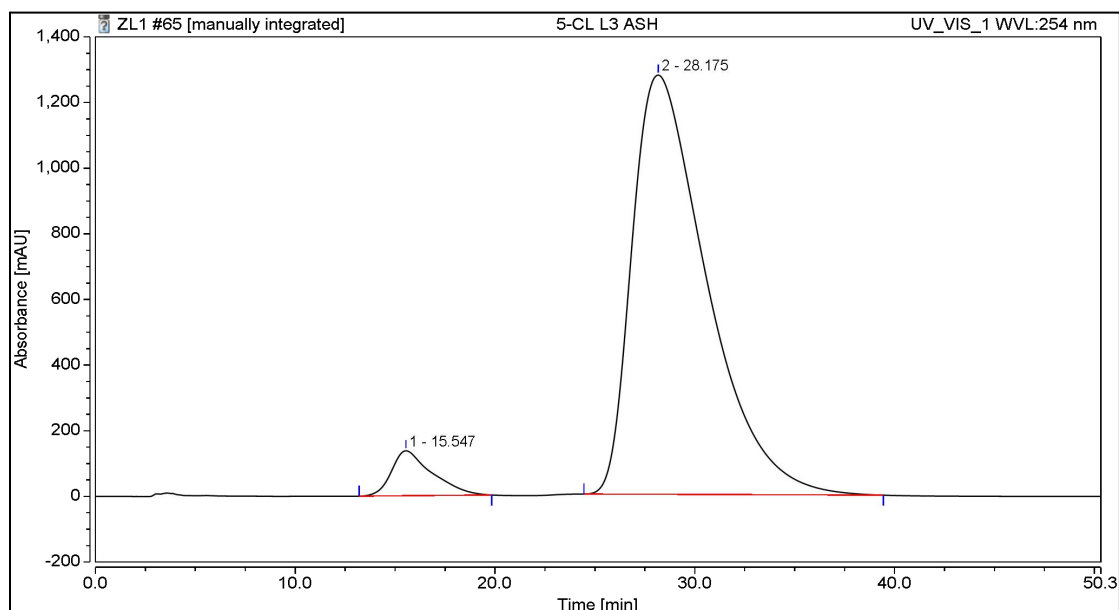

| Integration Results |           |                       |                 |                 |                    |                      |
|---------------------|-----------|-----------------------|-----------------|-----------------|--------------------|----------------------|
| No.                 | Peak Name | Retention Time<br>min | Area<br>mAU*min | Height<br>mAU   | Relative Area<br>% | Relative Height<br>% |
| 1                   |           | 15.547                | 321.673         | 137.085         | 5.50               | 9.69                 |
| 2                   |           | 28.175                | 5528.951        | 1277.709        | 94.50              | 90.31                |
| <b>Total:</b>       |           |                       | <b>5850.624</b> | <b>1414.794</b> | <b>100.00</b>      | <b>100.00</b>        |

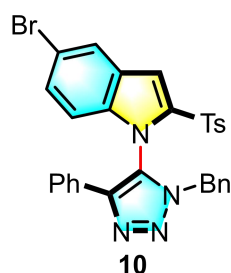

White solid, 36.7 mg, 63% yield, 96:4 er. [Chiral HPLC analysis of the product: Daicel Chiralpak AS-H 250X4.6 mm 5u column; *n*-hexane/2-propanol = 90/10, flow rate = 1.0 mL/min,  $\lambda = 254$  nm,  $t$  (major) = 29.18 min,  $t$  (minor) = 15.87 min].  $[\alpha]_D^{27} = -30.8^\circ$  ( $c = 0.5$ ,  $\text{CHCl}_3$ ).  **$^1\text{H NMR}$  (500 MHz,  $\text{CDCl}_3$ )**  $\delta$  7.85 (d,  $J = 1.6$  Hz, 1H), 7.69 (s, 1H), 7.26 (d,  $J = 8.3$  Hz, 2H), 7.08-7.00 (m, 2H), 6.99-6.93 (m, 3H), 6.91-6.84 (m, 4H), 6.78 (d,  $J = 8.1$  Hz, 2H), 6.71 (d,  $J = 8.1$  Hz, 2H), 5.95 (d,  $J = 8.9$  Hz, 1H), 5.81 (d,  $J = 15.0$  Hz, 1H), 5.28 (d,  $J = 15.0$  Hz, 1H), 2.05 (s, 3H).  **$^{13}\text{C NMR}$  (126 MHz,  $\text{CDCl}_3$ )**  $\delta$  145.3, 142.8, 138.2, 137.4, 135.4, 133.4, 130.2, 129.7, 128.7, 128.6, 128.4, 128.3, 128.2, 128.0, 127.0, 125.3, 125.2, 124.7, 116.2, 113.3, 112.5, 53.4, 21.5. **HRMS (ESI,  $m/z$ )** Calcd for  $\text{C}_{30}\text{H}_{24}\text{BrN}_4\text{O}_2\text{S}$  ( $\text{M}+\text{H}$ ) $^+$ : 583.0798, 583.0777; Found: 583.0792, 583.0774.



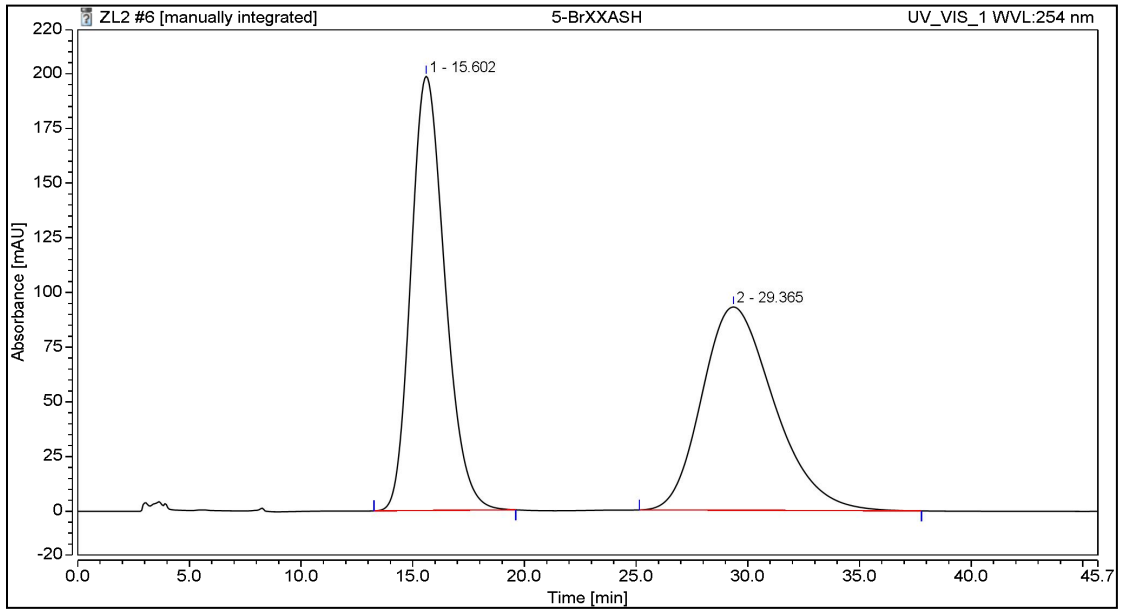

| Integration Results |           |                       |                 |                |                    |                      |
|---------------------|-----------|-----------------------|-----------------|----------------|--------------------|----------------------|
| No.                 | Peak Name | Retention Time<br>min | Area<br>mAU*min | Height<br>mAU  | Relative Area<br>% | Relative Height<br>% |
| 1                   |           | 15.602                | 350.324         | 198.494        | 50.13              | 68.12                |
| 2                   |           | 29.365                | 348.474         | 92.916         | 49.87              | 31.88                |
| <b>Total:</b>       |           |                       | <b>698.797</b>  | <b>291.410</b> | <b>100.00</b>      | <b>100.00</b>        |

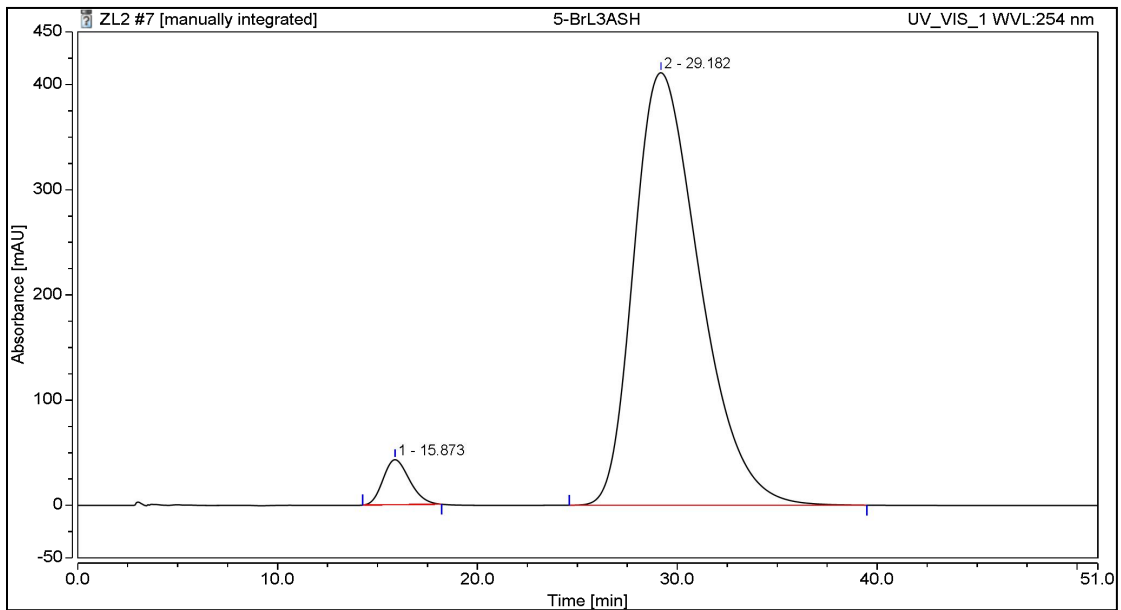

| Integration Results |           |                       |                 |                |                    |                      |
|---------------------|-----------|-----------------------|-----------------|----------------|--------------------|----------------------|
| No.                 | Peak Name | Retention Time<br>min | Area<br>mAU*min | Height<br>mAU  | Relative Area<br>% | Relative Height<br>% |
| 1                   |           | 15.873                | 66.001          | 42.854         | 4.03               | 9.44                 |
| 2                   |           | 29.182                | 1572.435        | 411.161        | 95.97              | 90.56                |
| <b>Total:</b>       |           |                       | <b>1638.436</b> | <b>454.015</b> | <b>100.00</b>      | <b>100.00</b>        |

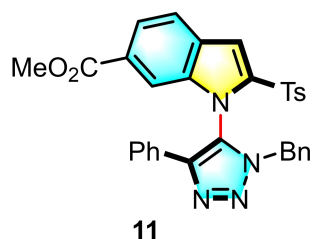

White solid, 29.2 mg, 52% yield, 92:8 er. [Chiral HPLC analysis of the product: Daicel Chiralpak AS-H 250X4.6 mm 5u column; *n*-hexane/2-propanol = 80/20, flow rate = 1.0 mL/min,  $\lambda = 254$  nm,  $t$  (major) = 23.11 min,  $t$  (minor) = 12.96 min].  $[\alpha]_D^{26} = -85.0^\circ$  ( $c = 0.5$ ,  $\text{CHCl}_3$ ).  $^1\text{H NMR}$  (500 MHz,  $\text{CDCl}_3$ )  $\delta$  7.82-7.71 (m, 3H), 7.28 (d,  $J = 8.2$  Hz, 2H), 7.01 (t,  $J = 7.4$  Hz, 1H), 6.92-6.81 (m, 7H), 6.79 (d,  $J = 8.1$  Hz, 2H), 6.73 (d,  $J = 7.7$  Hz, 2H), 6.69 (s, 1H), 5.85 (d,  $J = 15.0$  Hz, 1H), 5.27 (d,  $J = 15.0$  Hz, 1H), 3.75 (s, 3H), 2.06 (s, 3H).  $^{13}\text{C NMR}$  (126 MHz,  $\text{CDCl}_3$ )  $\delta$  165.2, 144.4, 142.1, 138.0, 137.9, 134.3, 132.3, 128.7, 127.8, 127.6, 127.6, 127.5, 127.3, 127.2, 127.2, 127.1, 124.2, 123.8, 122.628, 121.718, 112.7, 112.2, 52.5, 51.1, 20.6. **HRMS (ESI,  $m/z$ )** Calcd for  $\text{C}_{32}\text{H}_{27}\text{N}_4\text{O}_4\text{S}$  ( $\text{M}+\text{H}$ ) $^+$ : 563.1748; Found: 563.1740.

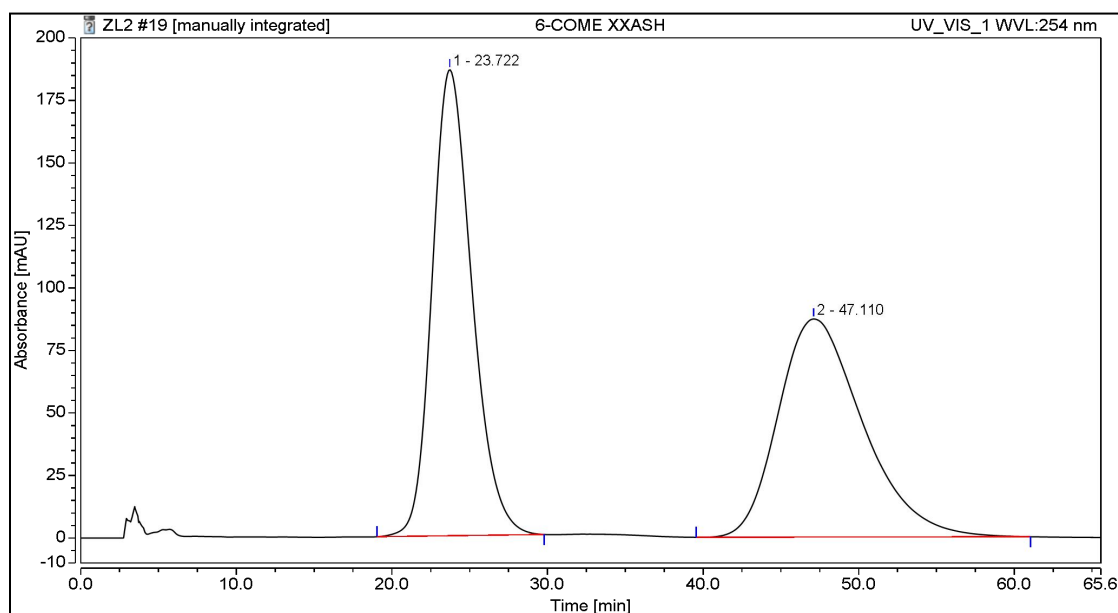

| Integration Results |           |                       |                 |                |                    |                      |
|---------------------|-----------|-----------------------|-----------------|----------------|--------------------|----------------------|
| No.                 | Peak Name | Retention Time<br>min | Area<br>mAU*min | Height<br>mAU  | Relative Area<br>% | Relative Height<br>% |
| 1                   |           | 23.722                | 553.142         | 186.416        | 50.17              | 68.12                |
| 2                   |           | 47.110                | 549.297         | 87.249         | 49.83              | 31.88                |
| <b>Total:</b>       |           |                       | <b>1102.440</b> | <b>273.665</b> | <b>100.00</b>      | <b>100.00</b>        |

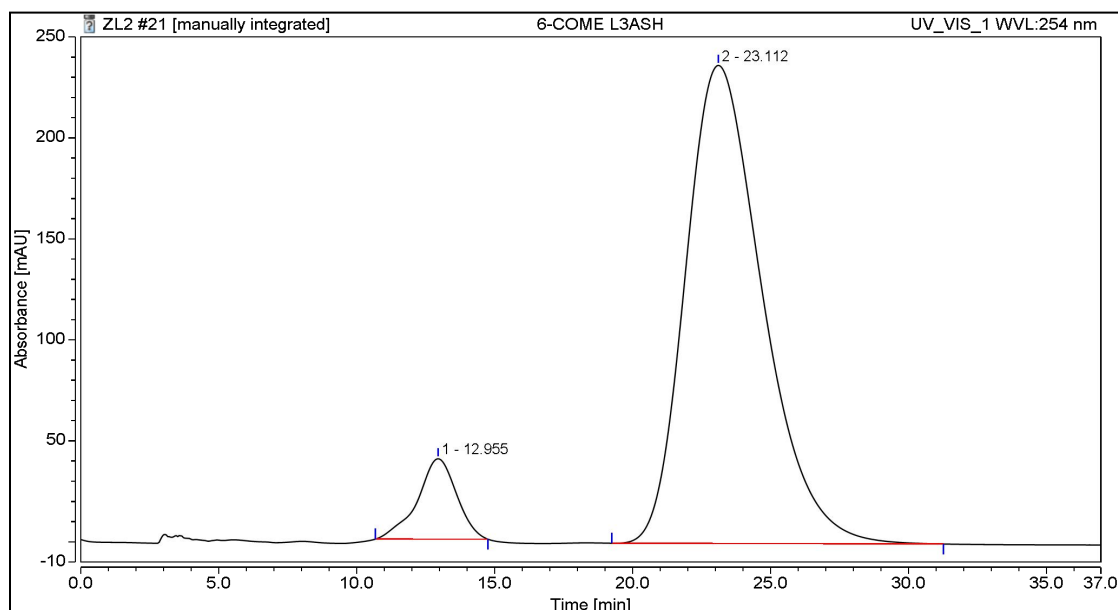

| Integration Results |           |                       |                 |                |                    |                      |
|---------------------|-----------|-----------------------|-----------------|----------------|--------------------|----------------------|
| No.                 | Peak Name | Retention Time<br>min | Area<br>mAU*min | Height<br>mAU  | Relative Area<br>% | Relative Height<br>% |
| 1                   |           | 12.955                | 65.576          | 39.823         | 7.92               | 14.40                |
| 2                   |           | 23.112                | 762.873         | 236.745        | 92.08              | 85.60                |
| <b>Total:</b>       |           |                       | <b>828.449</b>  | <b>276.569</b> | <b>100.00</b>      | <b>100.00</b>        |

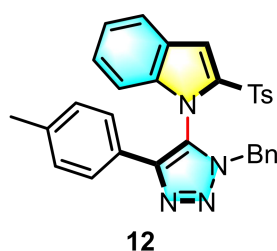

White solid, 41.9 mg, 81% yield, 95:5 er. [Chiral HPLC analysis of the product: Phenomenex 00G-4457-E0 250X4.6 mm 5u column; *n*-hexane/2-propanol = 85/15, flow rate = 1.0 mL/min,  $\lambda$  = 254 nm,  $t$  (major) = 35.12 min,  $t$  (minor) = 28.56 min].  $[\alpha]_D^{26} = -60.7^\circ$  ( $c = 0.7$ ,  $\text{CHCl}_3$ ).  **$^1\text{H NMR}$  (500 MHz,  $\text{CDCl}_3$ )**  $\delta$  7.76 (s, 1H), 7.70 (d,  $J = 8.1$  Hz, 1H), 7.27 (d,  $J = 8.3$  Hz, 2H), 7.13 (t,  $J = 7.6$  Hz, 1H), 7.00 (t,  $J = 7.3$  Hz, 1H), 6.96-6.84 (m, 5H), 6.78 (d,  $J = 8.1$  Hz, 2H), 6.68 (d,  $J = 8.2$  Hz, 2H), 6.61 (d,  $J = 8.3$  Hz, 2H), 6.11 (d,  $J = 8.4$  Hz, 1H), 5.76 (d,  $J = 15.0$  Hz, 1H), 5.25 (d,  $J = 15.0$  Hz, 1H), 2.16 (s, 3H), 2.05 (s, 3H).  **$^{13}\text{C NMR}$  (126 MHz,  $\text{CDCl}_3$ )**  $\delta$  144.8, 142.8, 139.7, 137.9, 136.1, 135.9, 133.5, 129.6, 128.8, 128.6, 128.4, 128.0, 127.2, 125.9, 125.5, 125.4, 124.8, 122.9, 122.9, 114.3, 111.1, 53.2, 21.4, 21.2. **HRMS (ESI,  $m/z$ )** Calcd for  $\text{C}_{31}\text{H}_{27}\text{N}_4\text{O}_2\text{S}$  ( $\text{M}+\text{H}$ ) $^+$ : 519.1849; Found: 519.1838.

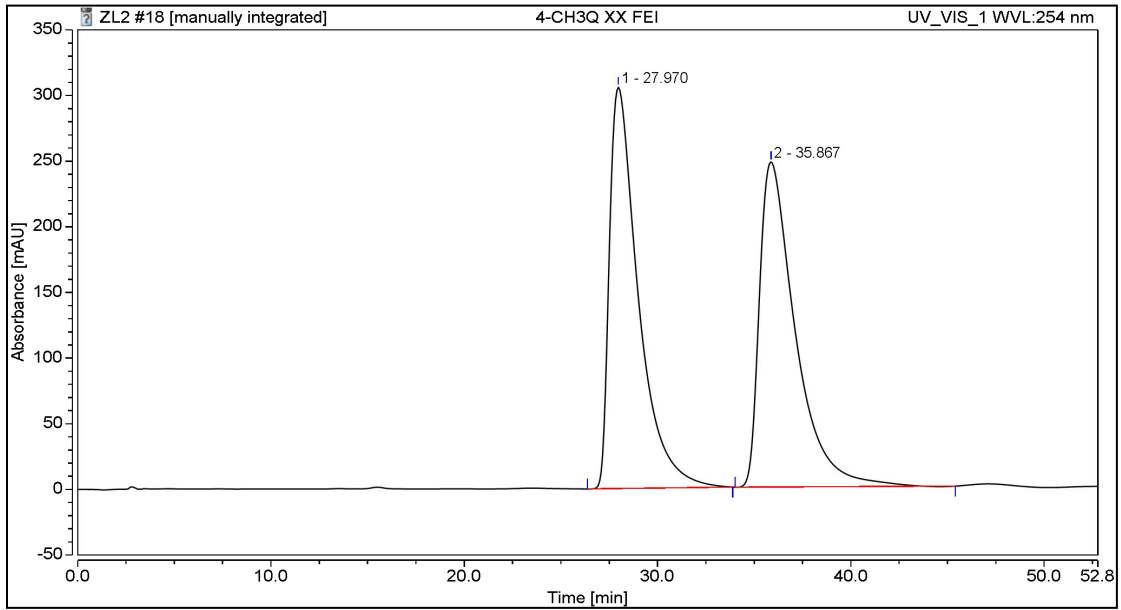

| Integration Results |           |                       |                 |                |                    |                      |
|---------------------|-----------|-----------------------|-----------------|----------------|--------------------|----------------------|
| No.                 | Peak Name | Retention Time<br>min | Area<br>mAU*min | Height<br>mAU  | Relative Area<br>% | Relative Height<br>% |
| 1                   |           | 27.970                | 529.372         | 305.697        | 49.91              | 55.24                |
| 2                   |           | 35.867                | 531.188         | 247.689        | 50.09              | 44.76                |
| <b>Total:</b>       |           |                       | <b>1060.561</b> | <b>553.386</b> | <b>100.00</b>      | <b>100.00</b>        |

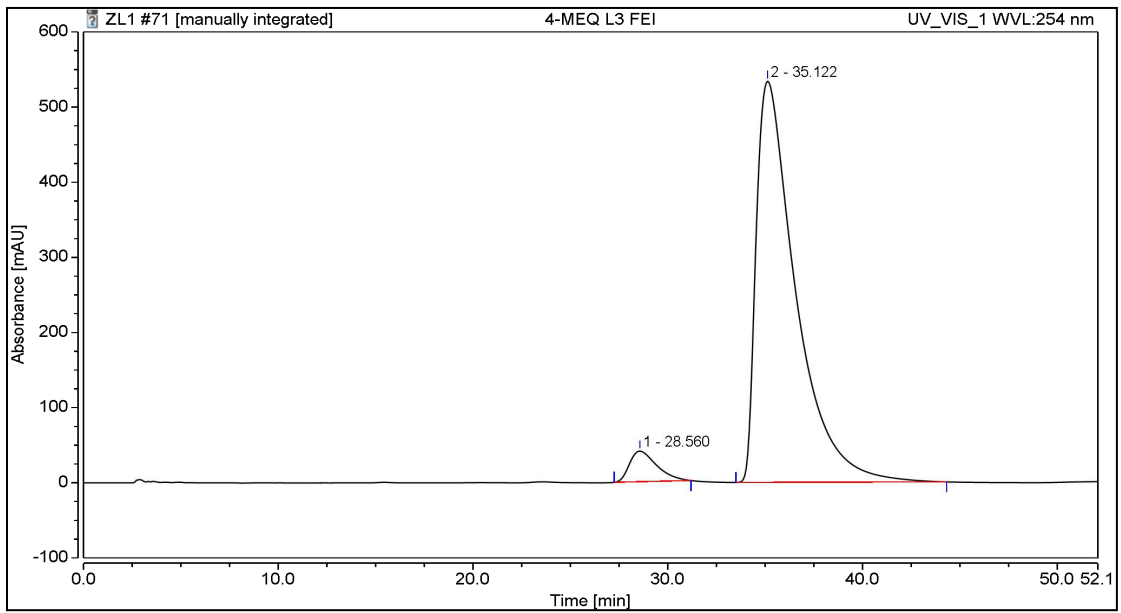

| Integration Results |           |                       |                 |                |                    |                      |
|---------------------|-----------|-----------------------|-----------------|----------------|--------------------|----------------------|
| No.                 | Peak Name | Retention Time<br>min | Area<br>mAU*min | Height<br>mAU  | Relative Area<br>% | Relative Height<br>% |
| 1                   |           | 28.560                | 65.952          | 40.793         | 4.99               | 7.10                 |
| 2                   |           | 35.122                | 1255.327        | 533.941        | 95.01              | 92.90                |
| <b>Total:</b>       |           |                       | <b>1321.279</b> | <b>574.733</b> | <b>100.00</b>      | <b>100.00</b>        |

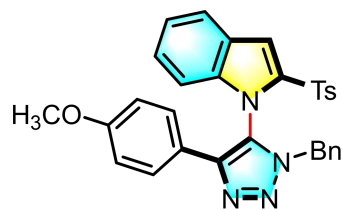

13

White solid, 47.5 mg, 89% yield, 98.5:1.5 er. [Chiral HPLC analysis of the product: Phenomenex 00G-4457-E0 250X4.6 mm 5u column; *n*-hexane/2-propanol = 70/30, flow rate =1.0 mL/min,  $\lambda$  = 254 nm,  $t$  (major) = 28.79 min,  $t$  (minor) = 19.84 min].  $[\alpha]_D^{26} = -83.6^\circ$  ( $c = 1.1$ ,  $\text{CHCl}_3$ ).  **$^1\text{H NMR}$  (500 MHz,  $\text{CDCl}_3$ )**  $\delta$  7.76 (s, 1H), 7.71 (d,  $J = 8.1$  Hz, 1H), 7.28 (d,  $J = 8.3$  Hz, 2H), 7.14 (t,  $J = 7.5$  Hz, 1H), 7.00 (t,  $J = 7.3$  Hz, 1H), 6.97-6.84 (m, 5H), 6.80 (d,  $J = 8.1$  Hz, 2H), 6.67 (d,  $J = 8.9$  Hz, 2H), 6.40 (d,  $J = 8.9$  Hz, 2H), 6.12 (d,  $J = 8.4$  Hz, 1H), 5.75 (d,  $J = 15.0$  Hz, 1H), 5.24 (d,  $J = 15.0$  Hz, 1H), 3.65 (s, 3H), 2.08 (s, 3H).  **$^{13}\text{C NMR}$  (126 MHz,  $\text{CDCl}_3$ )**  $\delta$  159.5, 144.9, 142.6, 139.7, 136.1, 135.8, 133.5, 129.6, 128.5, 128.4, 128.0, 127.2, 126.2, 125.5, 124.8, 122.9, 122.9, 121.4, 114.3, 113.6, 111.1, 55.2, 53.1, 21.4. **HRMS (ESI,  $m/z$ )** Calcd for  $\text{C}_{31}\text{H}_{27}\text{N}_4\text{O}_3\text{S}$  ( $\text{M}+\text{H}$ ) $^+$ : 535.1798; Found: 535.1786.

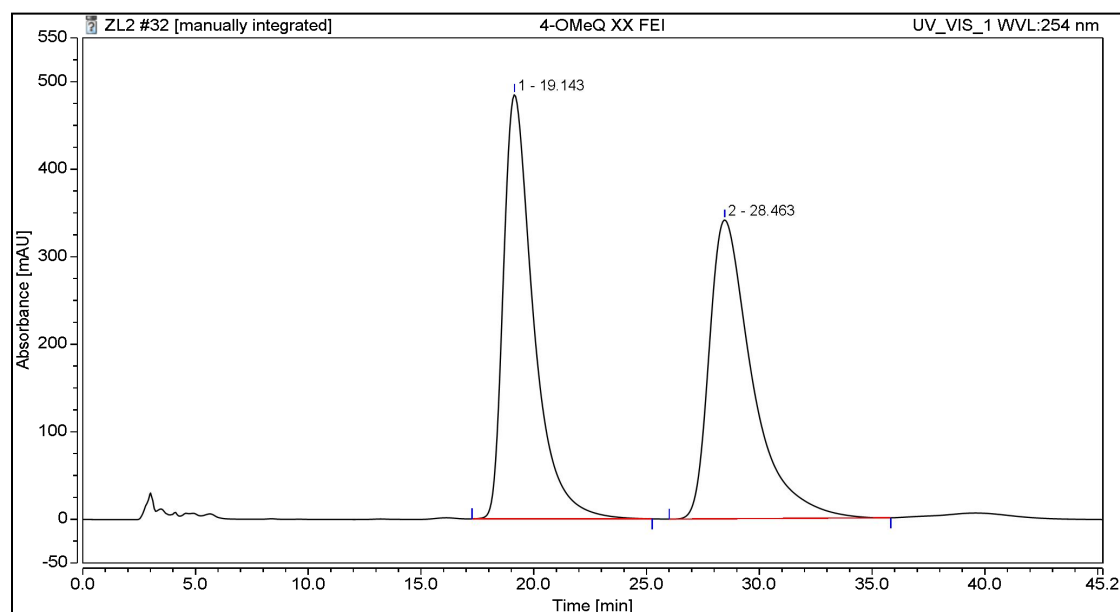

| Integration Results |           |                       |                 |                |                    |                      |
|---------------------|-----------|-----------------------|-----------------|----------------|--------------------|----------------------|
| No.                 | Peak Name | Retention Time<br>min | Area<br>mAU*min | Height<br>mAU  | Relative Area<br>% | Relative Height<br>% |
| 1                   |           | 19.143                | 748.754         | 484.775        | 49.82              | 58.67                |
| 2                   |           | 28.463                | 754.276         | 341.497        | 50.18              | 41.33                |
| <b>Total:</b>       |           |                       | <b>1503.030</b> | <b>826.272</b> | <b>100.00</b>      | <b>100.00</b>        |

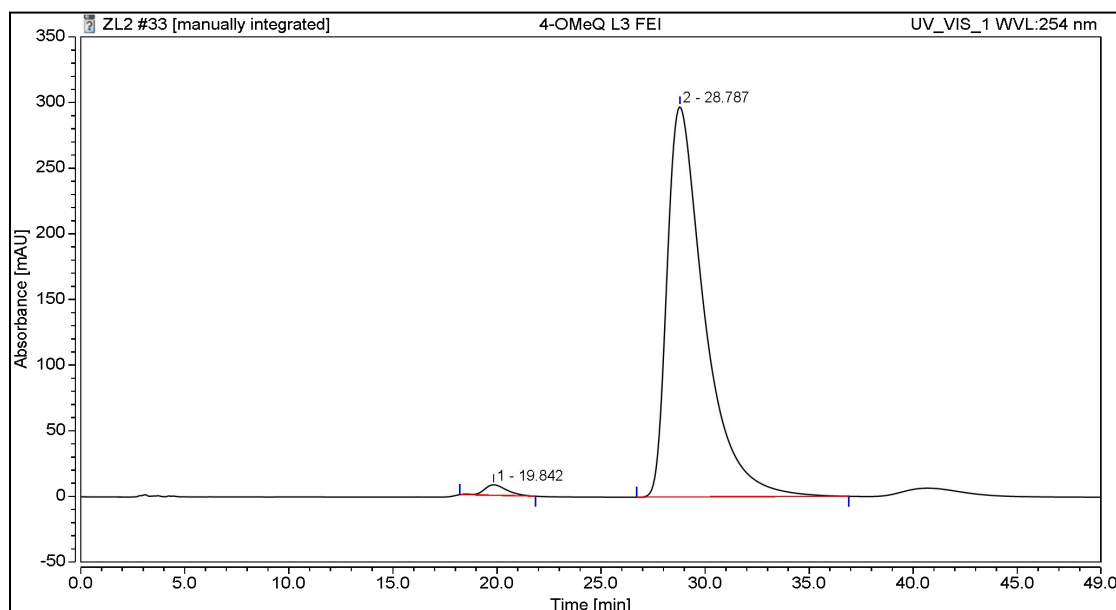

| Integration Results |           |                       |                 |                |                    |                      |
|---------------------|-----------|-----------------------|-----------------|----------------|--------------------|----------------------|
| No.                 | Peak Name | Retention Time<br>min | Area<br>mAU*min | Height<br>mAU  | Relative Area<br>% | Relative Height<br>% |
| 1                   |           | 19.842                | 10.146          | 8.026          | 1.62               | 2.63                 |
| 2                   |           | 28.787                | 615.625         | 297.212        | 98.38              | 97.37                |
| <b>Total:</b>       |           |                       | <b>625.771</b>  | <b>305.238</b> | <b>100.00</b>      | <b>100.00</b>        |

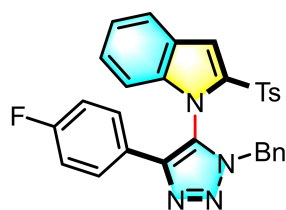

14

White solid, 41.2 mg, 79% yield, 94:6 er. [Chiral HPLC analysis of the product: Phenomenex 00G-4457-E0 250X4.6 mm 5u column; *n*-hexane/2-propanol = 90/10, flow rate = 1.0 mL/min,  $\lambda$  = 254 nm, *t* (major) = 40.56 min, *t* (minor) = 34.17 min].  $[\alpha]_D^{26} = -71.5^\circ$  (*c* = 0.7, CHCl<sub>3</sub>). **<sup>1</sup>H NMR (500 MHz, CDCl<sub>3</sub>)**  $\delta$  7.77 (s, 1H), 7.72 (d, *J* = 8.1 Hz, 1H), 7.29 (d, *J* = 8.3 Hz, 2H), 7.15 (t, *J* = 7.5 Hz, 1H), 7.01 (t, *J* = 7.3 Hz, 1H), 6.93 (q, *J* = 6.9, 6.1 Hz, 3H), 6.84 (dd, *J* = 20.9, 7.8 Hz, 4H), 6.76-6.69 (m, 2H), 6.57 (t, *J* = 8.7 Hz, 2H), 6.11 (d, *J* = 8.4 Hz, 1H), 5.76 (d, *J* = 15.0 Hz, 1H), 5.25 (d, *J* = 15.0 Hz, 1H), 2.11 (s, 3H). **<sup>13</sup>C NMR (126 MHz, CDCl<sub>3</sub>)**  $\delta$  163.5, 161.6, 145.1, 141.9, 139.6, 136.1, 136.0, 133.4, 129.6, 128.6, 128.5, 128.4, 128.0, 127.3, 126.7, 126.7, 125.5, 125.0, 123.1, 123.0, 115.2, 115.1, 114.5, 111.0, 53.3, 21.4. **<sup>19</sup>F NMR (471 MHz, CDCl<sub>3</sub>)**  $\delta$

-113.10. HRMS (ESI, m/z) Calcd for C<sub>30</sub>H<sub>24</sub>FN<sub>4</sub>O<sub>2</sub>S (M+H)<sup>+</sup>: 523.1599; Found: 523.1584.

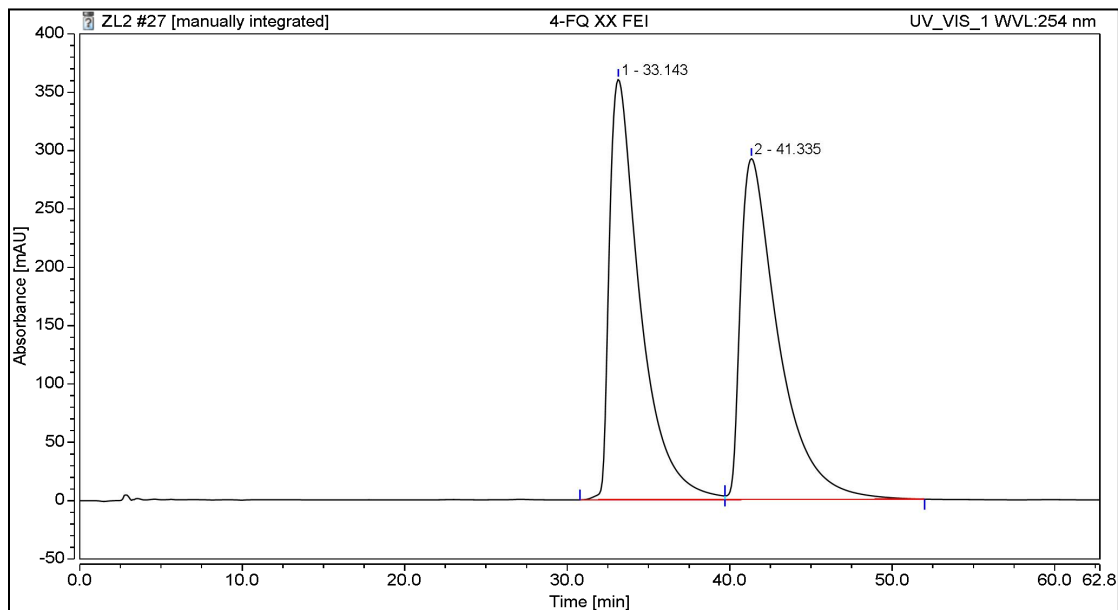

| Integration Results |           |                    |                 |                |                 |                   |
|---------------------|-----------|--------------------|-----------------|----------------|-----------------|-------------------|
| No.                 | Peak Name | Retention Time min | Area mAU*min    | Height mAU     | Relative Area % | Relative Height % |
| 1                   |           | 33.143             | 789.486         | 360.345        | 50.02           | 55.22             |
| 2                   |           | 41.335             | 788.721         | 292.189        | 49.98           | 44.78             |
| <b>Total:</b>       |           |                    | <b>1578.208</b> | <b>652.533</b> | <b>100.00</b>   | <b>100.00</b>     |

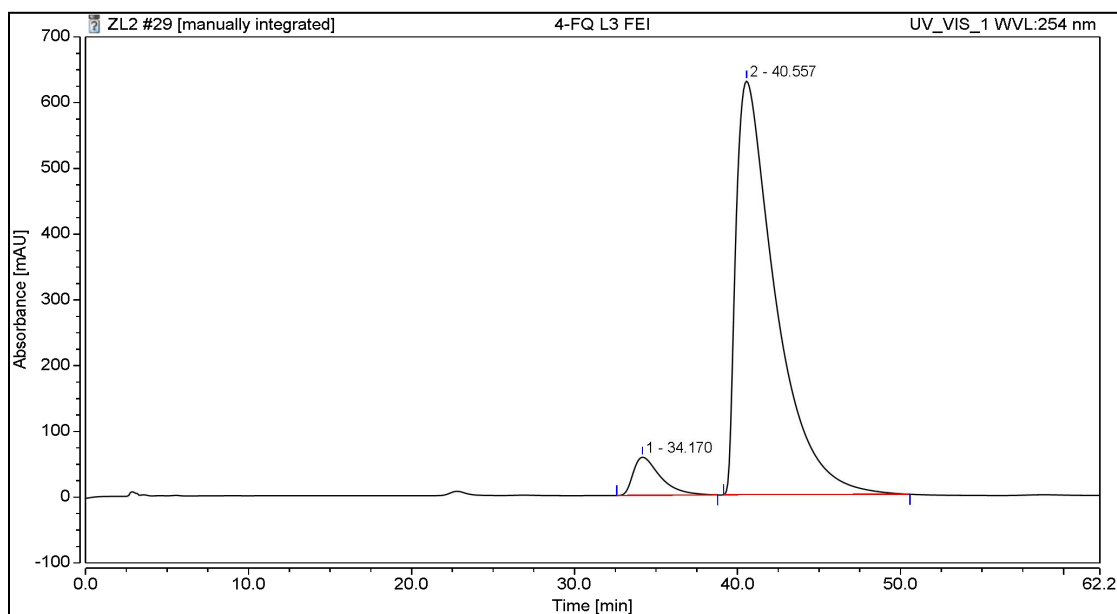

| Integration Results |           |                    |                 |                |                 |                   |
|---------------------|-----------|--------------------|-----------------|----------------|-----------------|-------------------|
| No.                 | Peak Name | Retention Time min | Area mAU*min    | Height mAU     | Relative Area % | Relative Height % |
| 1                   |           | 34.170             | 112.486         | 58.062         | 5.99            | 8.45              |
| 2                   |           | 40.557             | 1765.578        | 629.068        | 94.01           | 91.55             |
| <b>Total:</b>       |           |                    | <b>1878.063</b> | <b>687.131</b> | <b>100.00</b>   | <b>100.00</b>     |

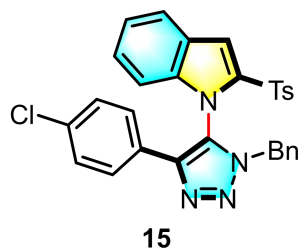

White solid, 47.3 mg, 88% yield, 91:9 er. [Chiral HPLC analysis of the product: Phenomenex 00G-4457-E0 250X4.6 mm 5u column; *n*-hexane/2-propanol = 90/10, flow rate =1.0 mL/min,  $\lambda$  = 254 nm, *t* (major) = 40.38 min, *t* (minor) = 31.58 min].  $[\alpha]_D^{26} = -72.0^\circ$  (*c* = 0.7, CHCl<sub>3</sub>). **<sup>1</sup>H NMR (500 MHz, CDCl<sub>3</sub>)**  $\delta$  7.77 (s, 1H), 7.72 (d, *J* = 8.1 Hz, 1H), 7.28 (d, *J* = 8.3 Hz, 2H), 7.16 (t, *J* = 7.5 Hz, 1H), 7.01 (t, *J* = 7.3 Hz, 1H), 6.97-6.90 (m, 3H), 6.89-6.78 (m, 6H), 6.67 (d, *J* = 8.6 Hz, 2H), 6.10 (d, *J* = 8.4 Hz, 1H), 5.77 (d, *J* = 15.0 Hz, 1H), 5.25 (d, *J* = 15.0 Hz, 1H), 2.12 (s, 3H). **<sup>13</sup>C NMR (126 MHz, CDCl<sub>3</sub>)**  $\delta$  145.2, 141.7, 139.5, 136.0, 135.9, 134.0, 133.3, 129.6, 128.6, 128.5, 128.4, 128.4, 128.0, 127.4, 127.2, 126.0, 125.9, 125.5, 123.1, 123.0, 114.6, 110.9, 53.3, 21.5. **HRMS (ESI, *m/z*)** Calcd for C<sub>30</sub>H<sub>24</sub>ClN<sub>4</sub>O<sub>2</sub>S (M+H)<sup>+</sup>: 539.1303; Found: 539.1290.

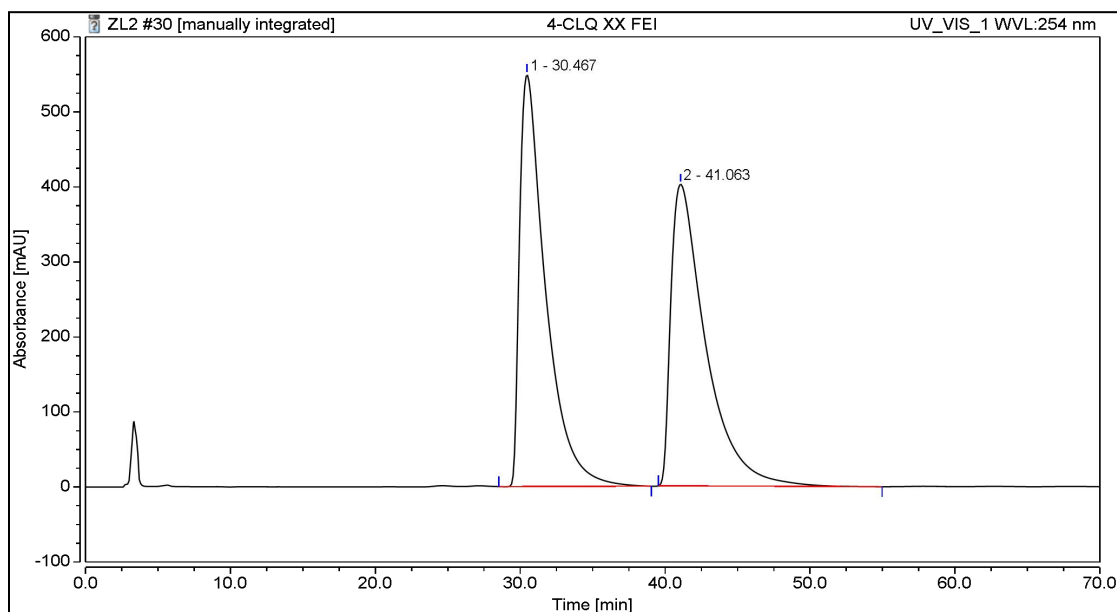

| Integration Results |           |                       |                 |                |                    |                      |
|---------------------|-----------|-----------------------|-----------------|----------------|--------------------|----------------------|
| No.                 | Peak Name | Retention Time<br>min | Area<br>mAU*min | Height<br>mAU  | Relative Area<br>% | Relative Height<br>% |
| 1                   |           | 30.467                | 1144.063        | 549.026        | 50.59              | 57.72                |
| 2                   |           | 41.063                | 1117.506        | 402.147        | 49.41              | 42.28                |
| <b>Total:</b>       |           |                       | <b>2261.569</b> | <b>951.173</b> | <b>100.00</b>      | <b>100.00</b>        |



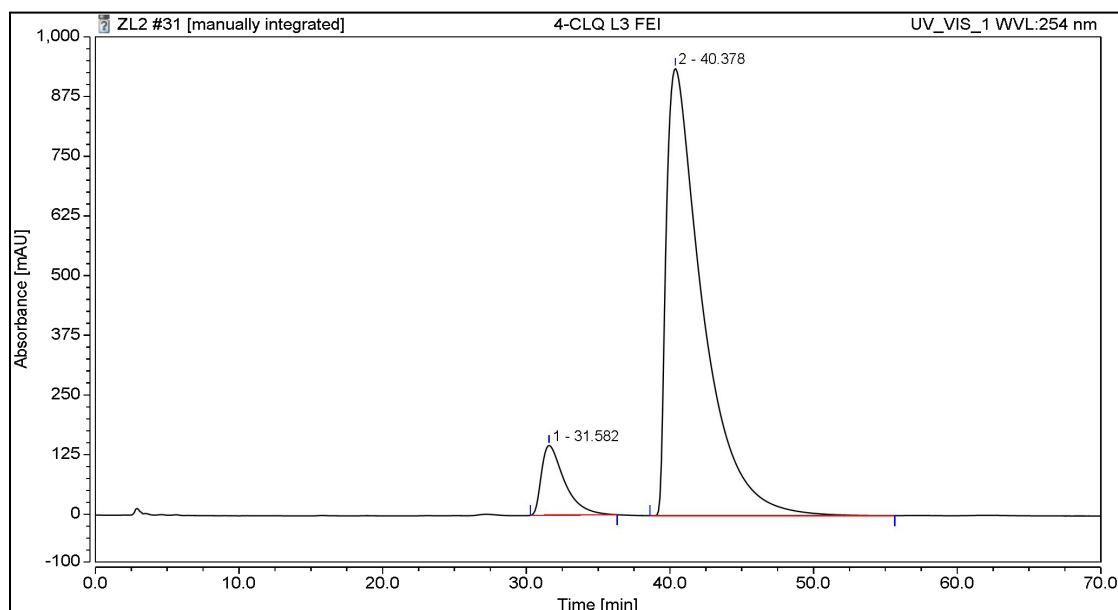

| Integration Results |           |                       |                 |                 |                    |                      |
|---------------------|-----------|-----------------------|-----------------|-----------------|--------------------|----------------------|
| No.                 | Peak Name | Retention Time<br>min | Area<br>mAU*min | Height<br>mAU   | Relative Area<br>% | Relative Height<br>% |
| 1                   |           | 31.582                | 271.999         | 146.177         | 9.01               | 13.50                |
| 2                   |           | 40.378                | 2745.507        | 936.922         | 90.99              | 86.50                |
| <b>Total:</b>       |           |                       | <b>3017.506</b> | <b>1083.099</b> | <b>100.00</b>      | <b>100.00</b>        |

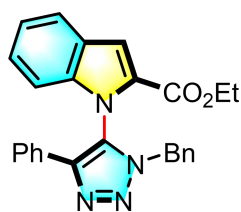

16

White solid, 37.2 mg, 88% yield, 97:3 er. [Chiral HPLC analysis of the product: Daicel Chiralpak AS-H 250X4.6 mm 5u column; *n*-hexane/2-propanol = 90/10, flow rate = 1.0 mL/min,  $\lambda$  = 254 nm, *t* (major) = 19.44 min, *t* (minor) = 28.50 min].  $[\alpha]_D^{26} = -103.0^\circ$  (*c* = 1.0, CHCl<sub>3</sub>). **<sup>1</sup>H NMR (500 MHz, CDCl<sub>3</sub>)**  $\delta$  7.74 (d, *J* = 8.1 Hz, 1H), 7.60 (s, 1H), 7.35-7.28 (m, 2H), 7.24-7.10 (m, 6H), 7.10-7.04 (m, 2H), 6.91 (d, *J* = 7.0 Hz, 2H), 6.60 (d, *J* = 8.3 Hz, 1H), 5.24 (d, *J* = 15.0 Hz, 1H), 5.19 (d, *J* = 15.0 Hz, 1H), 4.03 (dq, *J* = 10.7, 7.0 Hz, 1H), 3.91 (dq, *J* = 10.7, 7.2 Hz, 1H), 1.05 (t, *J* = 7.2 Hz, 3H). **<sup>13</sup>C NMR (126 MHz, CDCl<sub>3</sub>)**  $\delta$  158.9, 141.3, 138.1, 132.3, 128.4, 127.8, 127.8, 127.7, 127.5, 127.4, 127.2, 127.2, 125.9, 125.8, 124.4, 121.8, 121.6, 113.3, 109.9, 60.0, 51.3, 12.8. **HRMS (ESI, *m/z*)** Calcd for C<sub>26</sub>H<sub>23</sub>N<sub>4</sub>O<sub>2</sub> (M+H)<sup>+</sup>: 423.1816; Found: 423.1803.

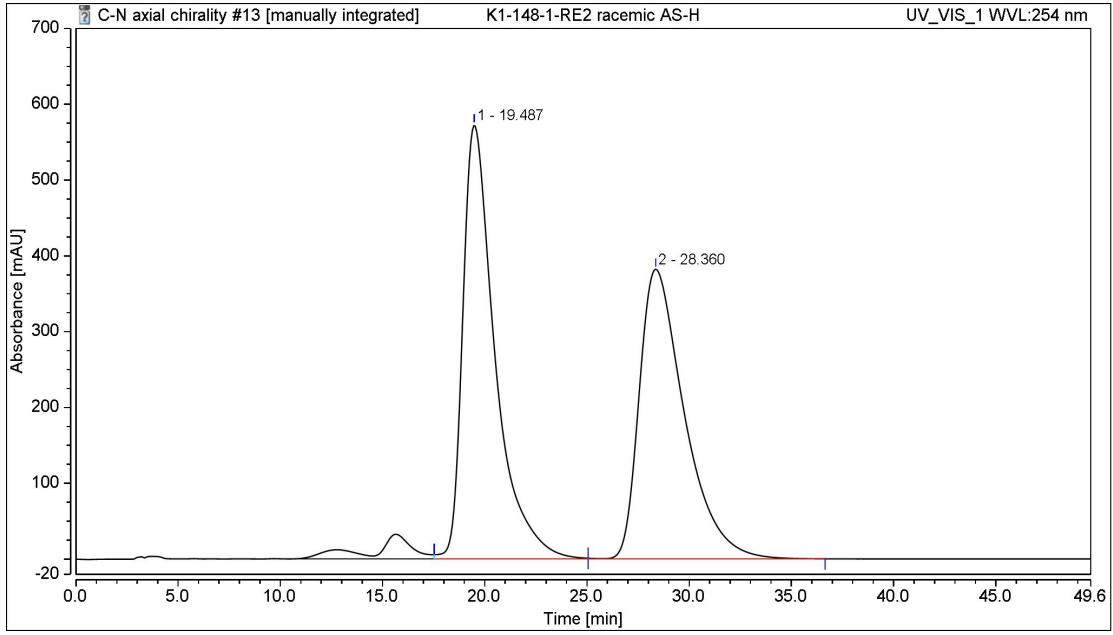

| Integration Results |           |                       |                 |                |                    |                      |
|---------------------|-----------|-----------------------|-----------------|----------------|--------------------|----------------------|
| No.                 | Peak Name | Retention Time<br>min | Area<br>mAU*min | Height<br>mAU  | Relative Area<br>% | Relative Height<br>% |
| 1                   |           | 19.487                | 1044.411        | 572.187        | 51.71              | 59.96                |
| 2                   |           | 28.360                | 975.394         | 382.081        | 48.29              | 40.04                |
| <b>Total:</b>       |           |                       | <b>2019.804</b> | <b>954.268</b> | <b>100.00</b>      | <b>100.00</b>        |

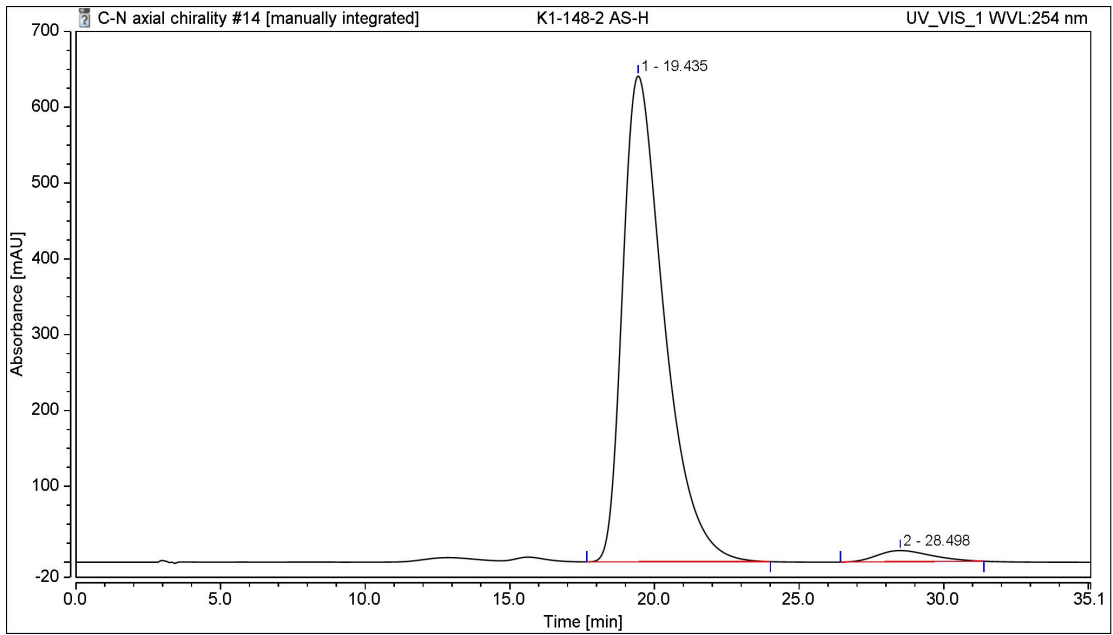

| Integration Results |           |                       |                 |                |                    |                      |
|---------------------|-----------|-----------------------|-----------------|----------------|--------------------|----------------------|
| No.                 | Peak Name | Retention Time<br>min | Area<br>mAU*min | Height<br>mAU  | Relative Area<br>% | Relative Height<br>% |
| 1                   |           | 19.435                | 1063.450        | 640.979        | 97.08              | 97.75                |
| 2                   |           | 28.498                | 31.933          | 14.731         | 2.92               | 2.25                 |
| <b>Total:</b>       |           |                       | <b>1095.383</b> | <b>655.710</b> | <b>100.00</b>      | <b>100.00</b>        |

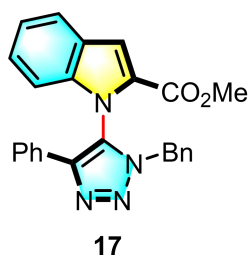

White solid, 39.6 mg, 97% yield, 97:3 er. [Chiral HPLC analysis of the product: Daicel Chiralpak AS-H 250X4.6 mm 5u column; *n*-hexane/2-propanol = 80/20, flow rate = 1.0 mL/min,  $\lambda = 254$  nm,  $t$  (major) = 12.90 min,  $t$  (minor) = 18.00 min].  $[\alpha]_D^{26} = -122.1^\circ$  ( $c = 0.9$ ,  $\text{CHCl}_3$ ).  **$^1\text{H NMR}$  (500 MHz,  $\text{CDCl}_3$ )**  $\delta$  7.74 (d,  $J = 7.9$  Hz, 1H), 7.55 (s, 1H), 7.33-7.27 (m, 2H), 7.23-7.19 (m, 1H), 7.19-7.10 (m, 5H), 7.10-7.04 (m, 2H), 6.90 (dt,  $J = 7.1, 1.3$  Hz, 2H), 6.59 (dd,  $J = 8.4, 1.1$  Hz, 1H), 5.23 (s, 2H), 3.58 (s, 3H).  **$^{13}\text{C NMR}$  (126 MHz,  $\text{CDCl}_3$ )**  $\delta$  159.4, 141.3, 138.2, 132.3, 128.4, 127.7, 127.5, 127.5, 127.3, 127.2, 127.2, 125.9, 125.7, 124.4, 121.8, 121.6, 113.2, 109.9, 51.3, 50.9. **HRMS (ESI,  $m/z$ )** Calcd for  $\text{C}_{25}\text{H}_{21}\text{N}_4\text{O}_2$  ( $\text{M}+\text{H}$ ) $^+$ : 409.1659; Found: 409.1659.

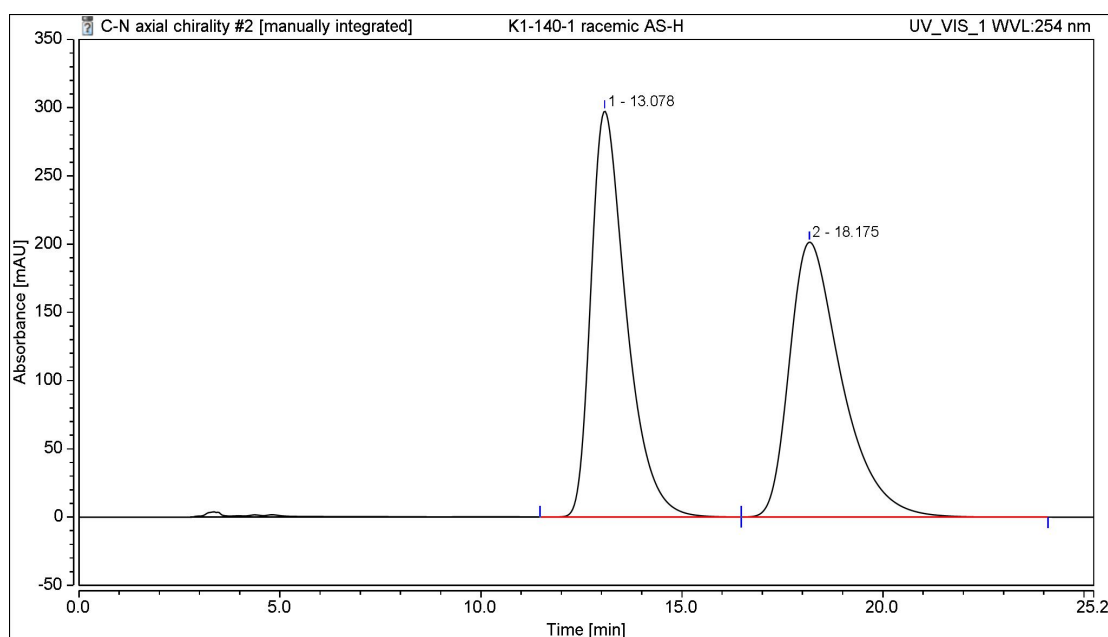

| Integration Results |           |                       |                 |                |                    |                      |
|---------------------|-----------|-----------------------|-----------------|----------------|--------------------|----------------------|
| No.                 | Peak Name | Retention Time<br>min | Area<br>mAU*min | Height<br>mAU  | Relative Area<br>% | Relative Height<br>% |
| 1                   |           | 13.078                | 304.096         | 297.546        | 50.03              | 59.62                |
| 2                   |           | 18.175                | 303.677         | 201.552        | 49.97              | 40.38                |
| <b>Total:</b>       |           |                       | <b>607.773</b>  | <b>499.097</b> | <b>100.00</b>      | <b>100.00</b>        |

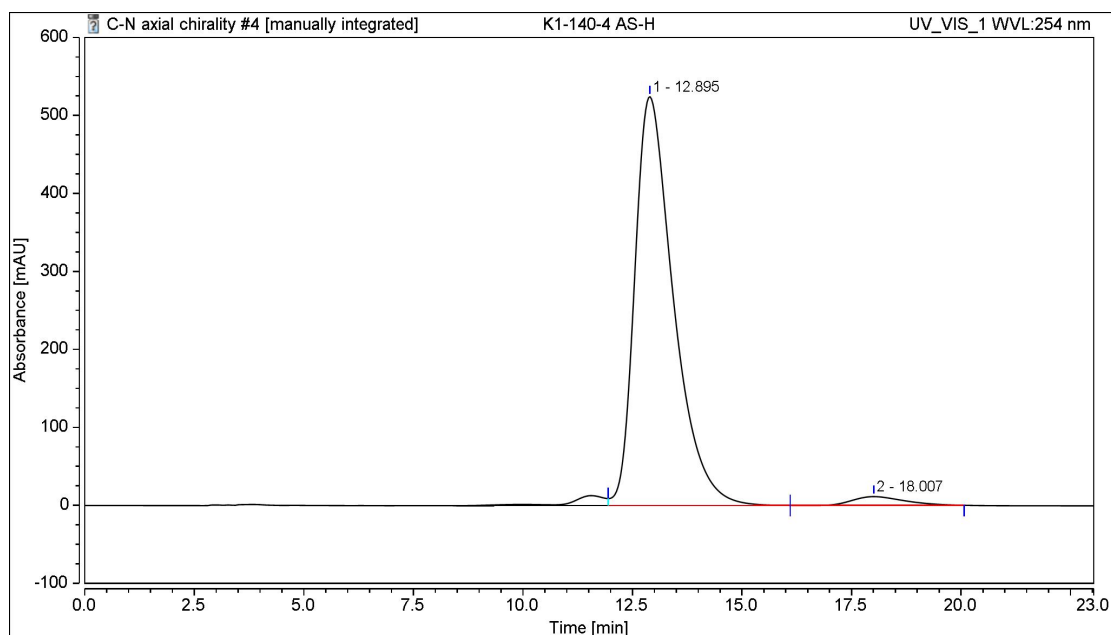

| Integration Results |           |                       |                 |                |                    |                      |
|---------------------|-----------|-----------------------|-----------------|----------------|--------------------|----------------------|
| No.                 | Peak Name | Retention Time<br>min | Area<br>mAU*min | Height<br>mAU  | Relative Area<br>% | Relative Height<br>% |
| 1                   |           | 12.895                | 536.308         | 524.364        | 97.22              | 97.90                |
| 2                   |           | 18.007                | 15.351          | 11.221         | 2.78               | 2.10                 |
| <b>Total:</b>       |           |                       | <b>551.659</b>  | <b>535.585</b> | <b>100.00</b>      | <b>100.00</b>        |

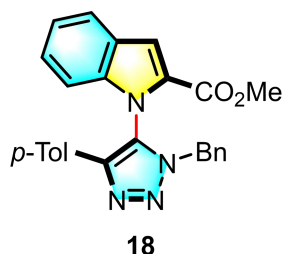

White solid, 40.1 mg, 95% yield, 98:2 er. [Chiral HPLC analysis of the product: Daicel Chiralpak AS-H 250X4.6 mm 5u column; *n*-hexane/2-propanol = 80/20, flow rate = 1.0 mL/min,  $\lambda$  = 254 nm,  $t$  (major) = 14.76 min,  $t$  (minor) = 19.38 min].  $[\alpha]_D^{24} = -138.5^\circ$  ( $c = 0.7$ ,  $\text{CHCl}_3$ ).  **$^1\text{H NMR}$  (500 MHz,  $\text{CDCl}_3$ )**  $\delta$  7.73 (d,  $J = 8.1$  Hz, 1H), 7.55 (s, 1H), 7.19 (dd,  $J = 16.0, 7.9$  Hz, 3H), 7.15-7.09 (m, 2H), 7.09-7.03 (m, 2H), 6.97 (d,  $J = 8.2$  Hz, 2H), 6.90 (d,  $J = 7.3$  Hz, 2H), 6.58 (d,  $J = 8.4$  Hz, 1H), 5.22 (s, 2H), 3.57 (s, 3H), 2.22 (s, 3H).  **$^{13}\text{C NMR}$  (126 MHz,  $\text{CDCl}_3$ )**  $\delta$  159.4, 141.4, 138.2, 137.1, 132.4, 128.4, 127.4, 127.3, 127.2, 127.1, 125.9, 125.7, 125.5, 124.3, 121.8, 121.5, 113.2, 109.9, 51.3, 50.8, 20.1. **HRMS (ESI,  $m/z$ )** Calcd for  $\text{C}_{26}\text{H}_{23}\text{N}_4\text{O}_2$  ( $\text{M}+\text{H}$ ) $^+$ : 423.1816; Found: 423.1824.

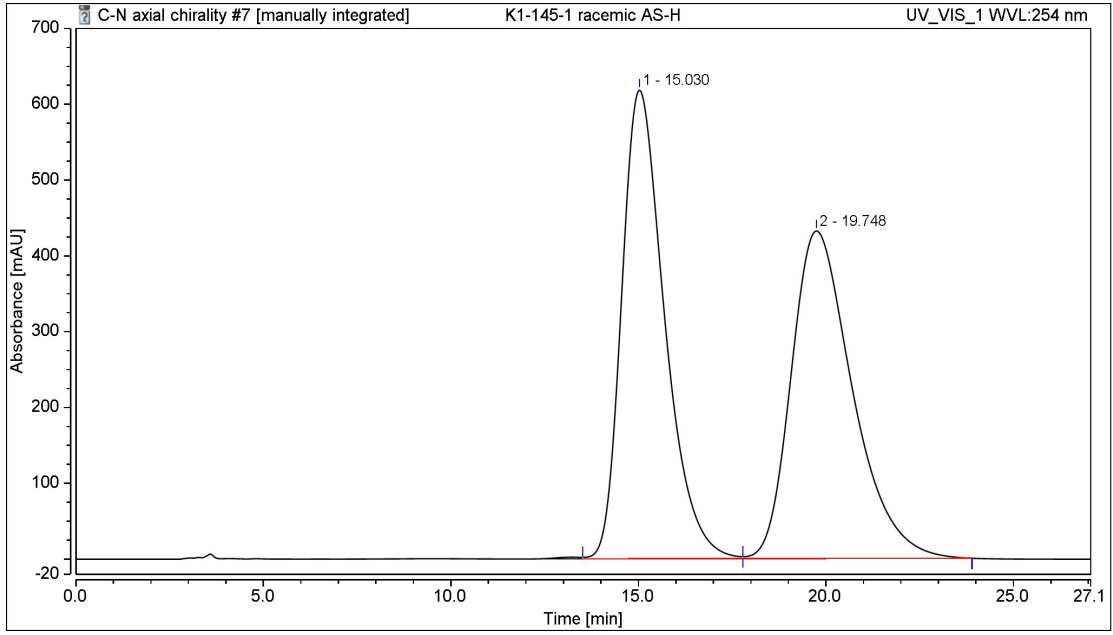

| Integration Results |           |                       |                 |                 |                    |                      |
|---------------------|-----------|-----------------------|-----------------|-----------------|--------------------|----------------------|
| No.                 | Peak Name | Retention Time<br>min | Area<br>mAU*min | Height<br>mAU   | Relative Area<br>% | Relative Height<br>% |
| 1                   |           | 15.030                | 817.110         | 618.224         | 50.03              | 58.86                |
| 2                   |           | 19.748                | 816.085         | 432.063         | 49.97              | 41.14                |
| <b>Total:</b>       |           |                       | <b>1633.195</b> | <b>1050.287</b> | <b>100.00</b>      | <b>100.00</b>        |

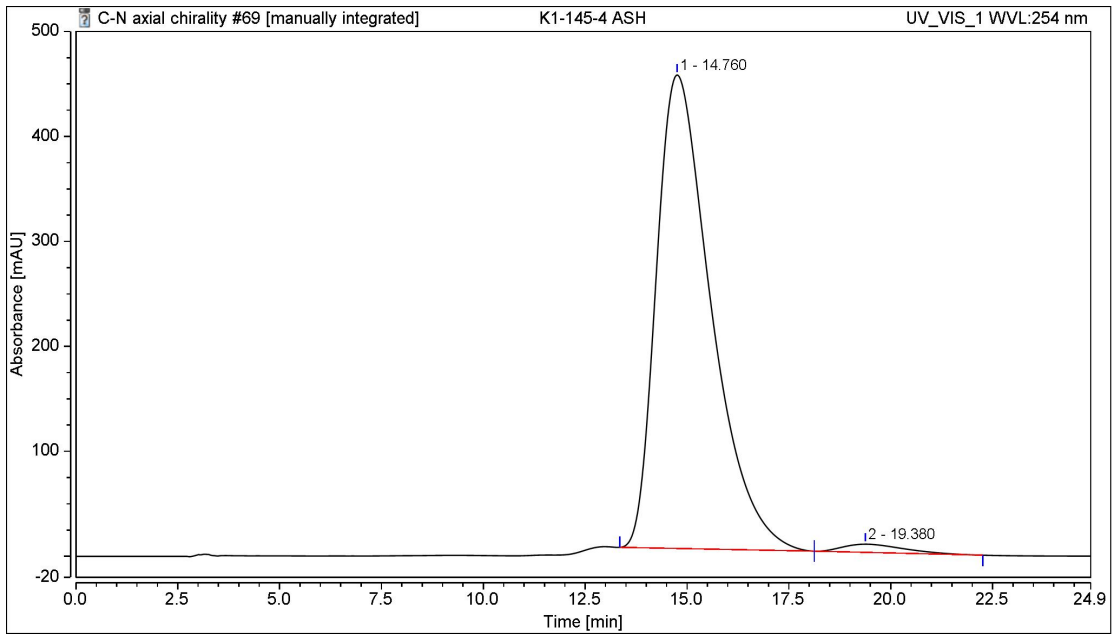

| Integration Results |           |                       |                 |                |                    |                      |
|---------------------|-----------|-----------------------|-----------------|----------------|--------------------|----------------------|
| No.                 | Peak Name | Retention Time<br>min | Area<br>mAU*min | Height<br>mAU  | Relative Area<br>% | Relative Height<br>% |
| 1                   |           | 14.760                | 701.418         | 451.134        | 98.08              | 98.29                |
| 2                   |           | 19.380                | 13.718          | 7.839          | 1.92               | 1.71                 |
| <b>Total:</b>       |           |                       | <b>715.136</b>  | <b>458.972</b> | <b>100.00</b>      | <b>100.00</b>        |

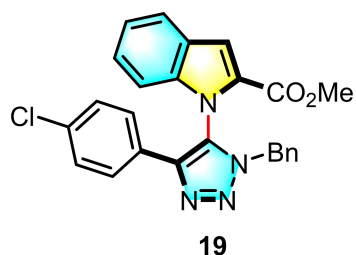

White solid, 43.8 mg, 99% yield, 98.5:1.5 er. [Chiral HPLC analysis of the product: Daicel Chiralpak AS-H 250X4.6 mm 5u column; *n*-hexane/2-propanol = 90/10, flow rate = 1.0 mL/min,  $\lambda$  = 254 nm, *t* (major) = 25.00 min, *t* (minor) = 31.33 min].  $[\alpha]_D^{26} = -150.5^\circ$  (*c* = 1.5, CHCl<sub>3</sub>). **<sup>1</sup>H NMR (500 MHz, CDCl<sub>3</sub>)**  $\delta$  7.74 (d, *J* = 8.1 Hz, 1H), 7.55 (s, 1H), 7.22 (dd, *J* = 7.9, 5.8 Hz, 3H), 7.17-7.10 (m, 4H), 7.07 (t, *J* = 7.4 Hz, 2H), 6.89 (d, *J* = 7.3 Hz, 2H), 6.56 (d, *J* = 8.4 Hz, 1H), 5.23 (s, 2H), 3.60 (s, 3H). **<sup>13</sup>C NMR (126 MHz, CDCl<sub>3</sub>)**  $\delta$  159.4, 140.4, 138.1, 133.1, 132.2, 127.9, 127.7, 127.5, 127.4, 127.2, 127.1, 126.9, 126.0, 125.8, 125.6, 121.9, 121.8, 113.3, 109.7, 51.4, 50.9. **HRMS (ESI, *m/z*)** Calcd for C<sub>25</sub>H<sub>20</sub>ClN<sub>4</sub>O<sub>2</sub> (M+H)<sup>+</sup>: 443.1269; Found: 443.1264.

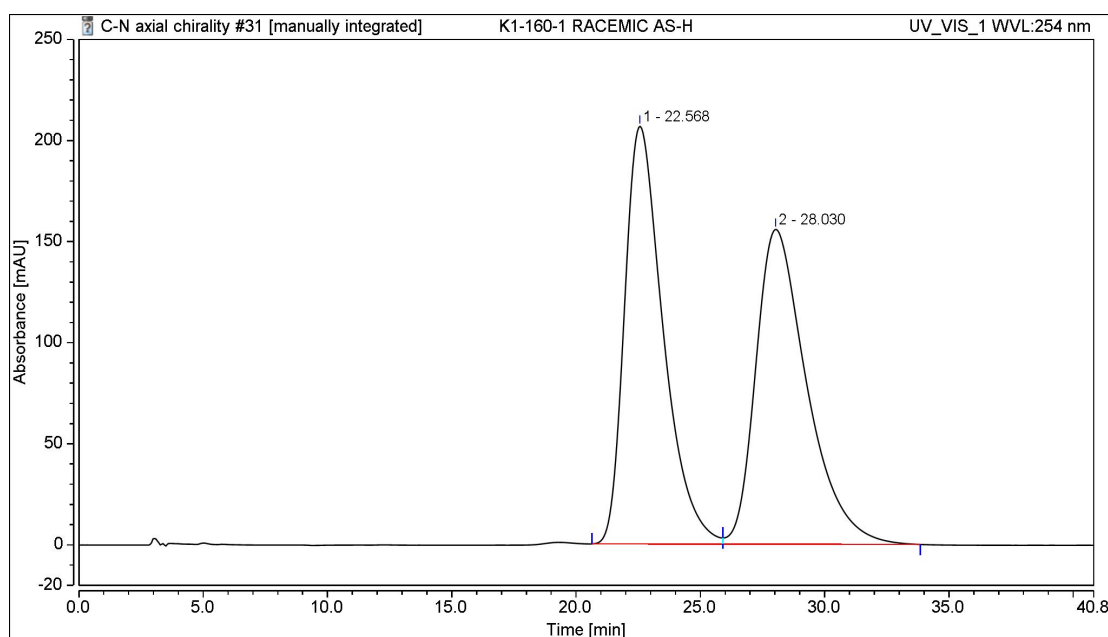

| Integration Results |           |                    |                |                |                 |                   |
|---------------------|-----------|--------------------|----------------|----------------|-----------------|-------------------|
| No.                 | Peak Name | Retention Time min | Area mAU*min   | Height mAU     | Relative Area % | Relative Height % |
| 1                   |           | 22.568             | 371.844        | 206.617        | 50.09           | 57.02             |
| 2                   |           | 28.030             | 370.434        | 155.734        | 49.91           | 42.98             |
| <b>Total:</b>       |           |                    | <b>742.277</b> | <b>362.351</b> | <b>100.00</b>   | <b>100.00</b>     |

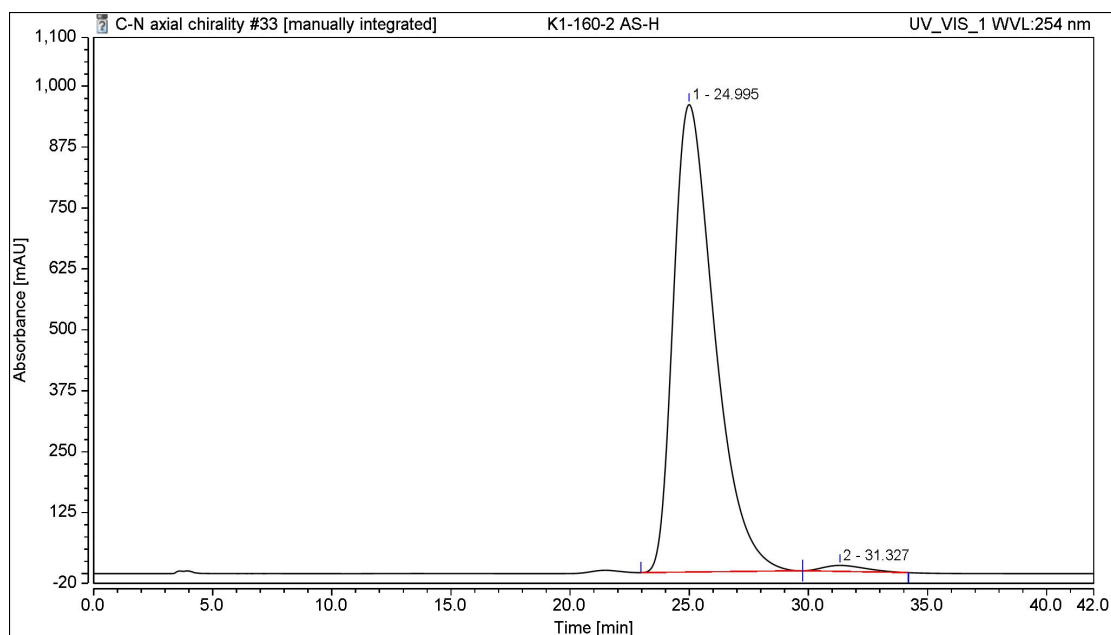

| Integration Results |           |                       |                 |                |                    |                      |
|---------------------|-----------|-----------------------|-----------------|----------------|--------------------|----------------------|
| No.                 | Peak Name | Retention Time<br>min | Area<br>mAU*min | Height<br>mAU  | Relative Area<br>% | Relative Height<br>% |
| 1                   |           | 24.995                | 1917.227        | 959.612        | 98.68              | 98.74                |
| 2                   |           | 31.327                | 25.549          | 12.248         | 1.32               | 1.26                 |
| <b>Total:</b>       |           |                       | <b>1942.776</b> | <b>971.860</b> | <b>100.00</b>      | <b>100.00</b>        |

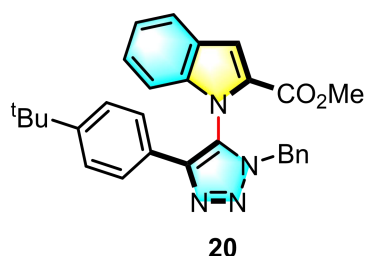

White solid, 44.6 mg, 96% yield, 97.5:2.5 er. [Chiral HPLC analysis of the product: Daicel Chiralpak AS-H 250X4.6 mm 5u column; *n*-hexane/2-propanol = 90/10, flow rate = 1.0 mL/min,  $\lambda$  = 254 nm,  $t$  (major) = 11.62 min,  $t$  (minor) = 16.52 min].  $[\alpha]_D^{26} = -138.8^\circ$  ( $c = 1.4$ ,  $\text{CHCl}_3$ ).  $^1\text{H NMR}$  (500 MHz,  $\text{CDCl}_3$ )  $\delta$  7.74 (d,  $J = 8.1$  Hz, 1H), 7.57 (s, 1H), 7.26-7.22 (m, 2H), 7.22-7.16 (m, 3H), 7.16-7.10 (m, 2H), 7.07 (t,  $J = 7.4$  Hz, 2H), 6.91 (d,  $J = 7.3$  Hz, 2H), 6.59 (d,  $J = 8.4$  Hz, 1H), 5.22 (s, 2H), 3.58 (s, 3H), 1.21 (s, 9H).  $^{13}\text{C NMR}$  (126 MHz,  $\text{CDCl}_3$ )  $\delta$  159.4, 150.2, 141.3, 138.3, 132.4, 127.4, 127.3, 127.3, 127.2, 127.1, 125.9, 125.7, 125.5, 124.6, 124.0, 121.8, 121.5, 113.1, 110.0, 51.3, 50.8, 33.5, 30.1. HRMS (ESI,  $m/z$ ,  $m/z$ ) Calcd for  $\text{C}_{29}\text{H}_{29}\text{N}_4\text{O}_2$  ( $\text{M}+\text{H}$ ) $^+$ : 465.2285; Found: 465.2282.

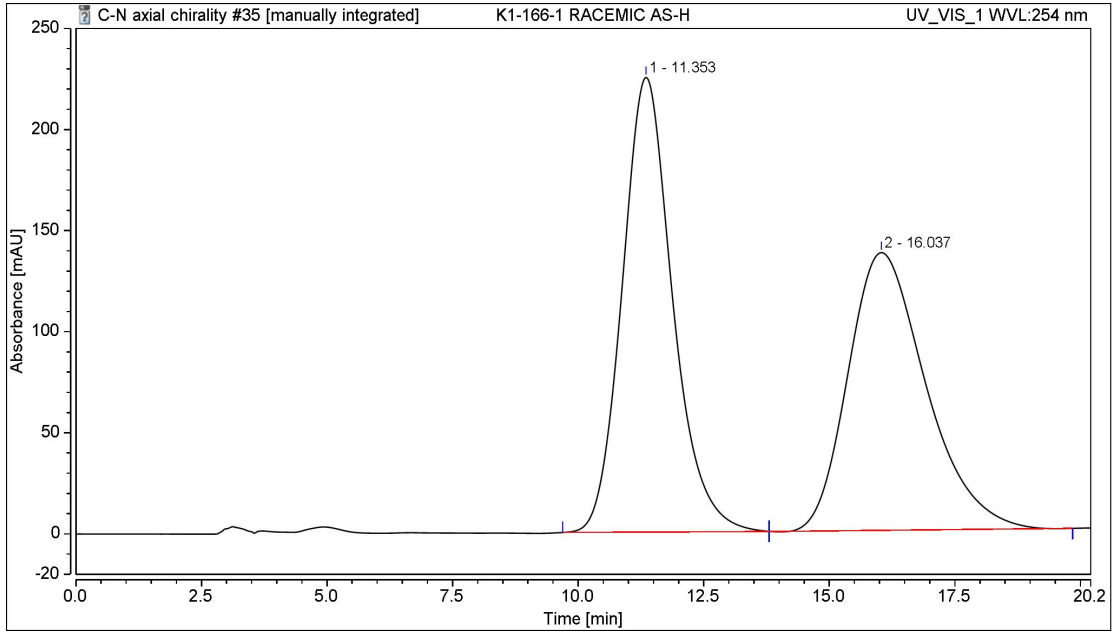

| Integration Results |           |                    |                |                |                 |                   |
|---------------------|-----------|--------------------|----------------|----------------|-----------------|-------------------|
| No.                 | Peak Name | Retention Time min | Area mAU*min   | Height mAU     | Relative Area % | Relative Height % |
| 1                   |           | 11.353             | 261.306        | 224.954        | 51.47           | 62.08             |
| 2                   |           | 16.037             | 246.368        | 137.401        | 48.53           | 37.92             |
| <b>Total:</b>       |           |                    | <b>507.674</b> | <b>362.356</b> | <b>100.00</b>   | <b>100.00</b>     |

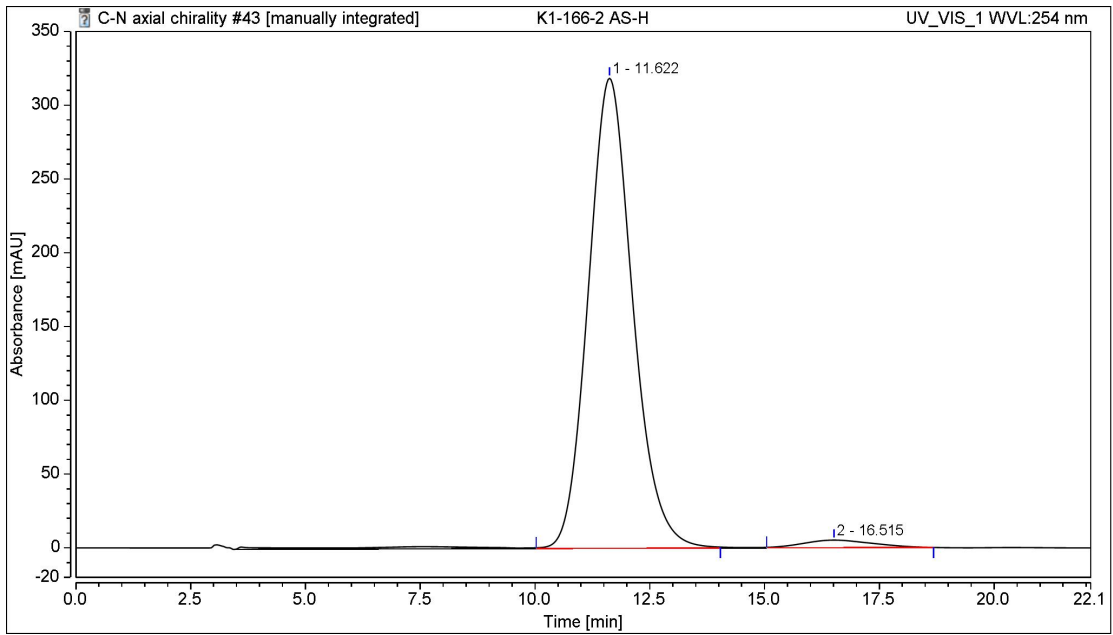

| Integration Results |           |                    |                |                |                 |                   |
|---------------------|-----------|--------------------|----------------|----------------|-----------------|-------------------|
| No.                 | Peak Name | Retention Time min | Area mAU*min   | Height mAU     | Relative Area % | Relative Height % |
| 1                   |           | 11.622             | 357.320        | 318.637        | 97.51           | 98.40             |
| 2                   |           | 16.515             | 9.118          | 5.178          | 2.49            | 1.60              |
| <b>Total:</b>       |           |                    | <b>366.437</b> | <b>323.815</b> | <b>100.00</b>   | <b>100.00</b>     |



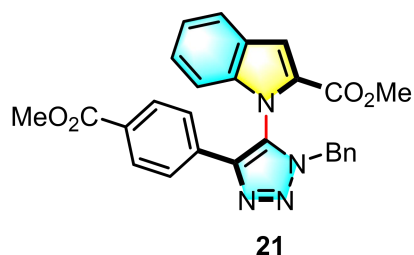

White solid, 46.2 mg, 99% yield, 99:1 er. [Chiral HPLC analysis of the product: Daicel Chiralpak AS-H 250X4.6 mm 5u column; *n*-hexane/2-propanol = 90/10, flow rate = 1.0 mL/min,  $\lambda$  = 254 nm, *t* (major) = 28.20 min, *t* (minor) = 37.28 min].  $[\alpha]_D^{26} = -197.5^\circ$  (*c* = 1.6, CHCl<sub>3</sub>). **<sup>1</sup>H NMR (500 MHz, CDCl<sub>3</sub>)**  $\delta$  7.83 (d, *J* = 8.4 Hz, 2H), 7.74 (d, *J* = 8.1 Hz, 1H), 7.56 (s, 1H), 7.34 (d, *J* = 8.5 Hz, 2H), 7.22 (t, *J* = 7.5 Hz, 1H), 7.17-7.10 (m, 2H), 7.07 (t, *J* = 7.6 Hz, 2H), 6.90 (d, *J* = 7.5 Hz, 2H), 6.56 (d, *J* = 8.4 Hz, 1H), 5.25 (s, 2H), 3.82 (s, 3H), 3.60 (s, 3H). **<sup>13</sup>C NMR (126 MHz, CDCl<sub>3</sub>)**  $\delta$  165.6, 159.4, 140.3, 138.1, 132.7, 132.2, 129.0, 128.6, 128.5, 127.5, 127.4, 127.2, 127.1, 126.1, 125.8, 124.2, 122.0, 121.8, 113.4, 109.7, 51.4, 51.0, 50.9. **HRMS (ESI, *m/z*)** Calcd for C<sub>27</sub>H<sub>23</sub>N<sub>4</sub>O<sub>4</sub> (M+H)<sup>+</sup>: 467.1714; Found: 467.1711.

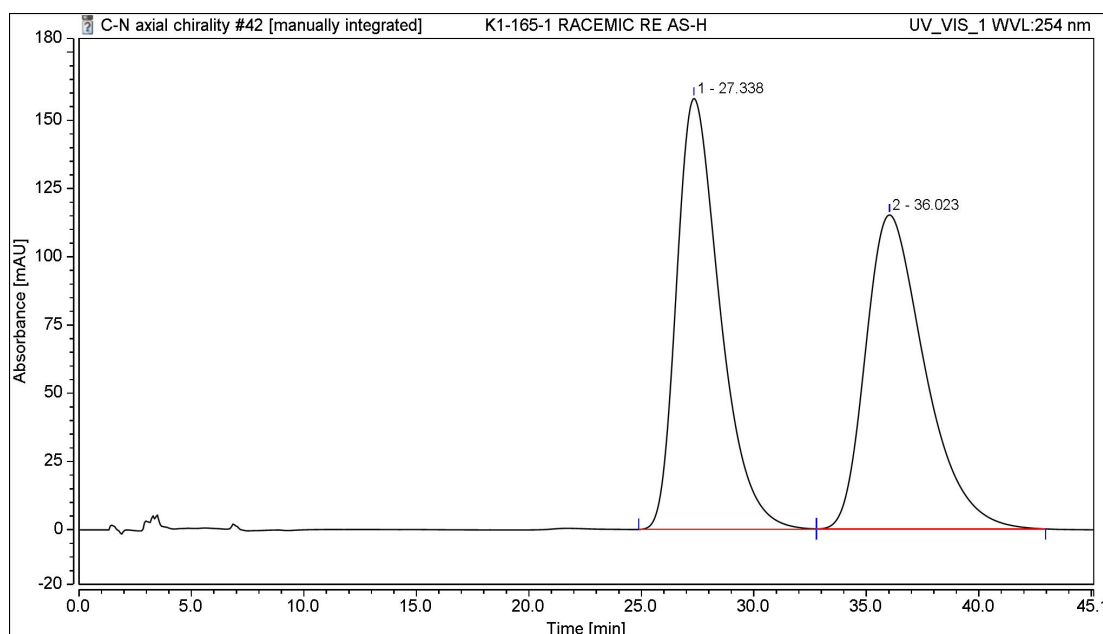

| Integration Results |           |                       |                 |                |                    |                      |
|---------------------|-----------|-----------------------|-----------------|----------------|--------------------|----------------------|
| No.                 | Peak Name | Retention Time<br>min | Area<br>mAU*min | Height<br>mAU  | Relative Area<br>% | Relative Height<br>% |
| 1                   |           | 27.338                | 353.414         | 157.901        | 50.15              | 57.83                |
| 2                   |           | 36.023                | 351.275         | 115.126        | 49.85              | 42.17                |
| <b>Total:</b>       |           |                       | <b>704.690</b>  | <b>273.028</b> | <b>100.00</b>      | <b>100.00</b>        |

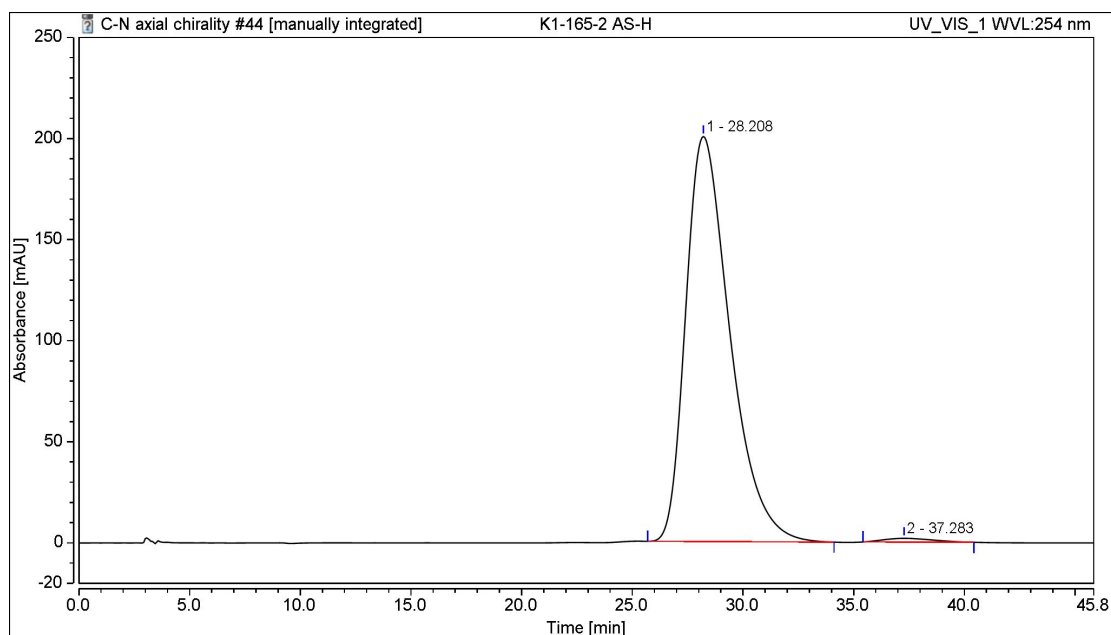

| Integration Results |           |                       |                 |                |                    |                      |
|---------------------|-----------|-----------------------|-----------------|----------------|--------------------|----------------------|
| No.                 | Peak Name | Retention Time<br>min | Area<br>mAU*min | Height<br>mAU  | Relative Area<br>% | Relative Height<br>% |
| 1                   |           | 28.208                | 464.106         | 200.370        | 99.00              | 99.09                |
| 2                   |           | 37.283                | 4.700           | 1.842          | 1.00               | 0.91                 |
| <b>Total:</b>       |           |                       | <b>468.806</b>  | <b>202.211</b> | <b>100.00</b>      | <b>100.00</b>        |

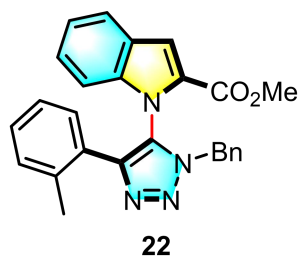

White solid, 36.3 mg, 86% yield, 96.5:3.5 er. [Chiral HPLC analysis of the product: Daicel Chiralpak AS-H 250X4.6 mm 5u column; *n*-hexane/2-propanol = 90/10, flow rate = 1.0 mL/min,  $\lambda$  = 254 nm, *t* (major) = 28.22 min, *t* (minor) = 44.43 min].  $[\alpha]_D^{26} = -49.9^\circ$  (*c* = 1.2, CHCl<sub>3</sub>). **<sup>1</sup>H NMR (500 MHz, CDCl<sub>3</sub>)**  $\delta$  7.65 (dd, *J* = 6.2, 3.0 Hz, 1H), 7.41 (s, 1H), 7.19-7.05 (m, 7H), 6.93-6.86 (m, 4H), 6.65 (dd, *J* = 6.2, 3.3 Hz, 1H), 5.27 (d, *J* = 14.8 Hz, 1H), 5.22 (d, *J* = 14.8 Hz, 1H), 3.61 (s, 3H), 2.35 (s, 3H). **<sup>13</sup>C NMR (126 MHz, CDCl<sub>3</sub>)**  $\delta$  159.5, 142.9, 138.7, 136.5, 132.3, 129.5, 128.8, 128.0, 127.5, 127.4, 127.3, 127.2, 125.7, 125.5, 124.5, 121.8, 121.4, 112.9, 109.7, 51.5, 50.8, 19.4. **HRMS (ESI, *m/z*)** Calcd for C<sub>26</sub>H<sub>23</sub>N<sub>4</sub>O<sub>2</sub> (M+H)<sup>+</sup>: 423.1816; Found: 423.1829.

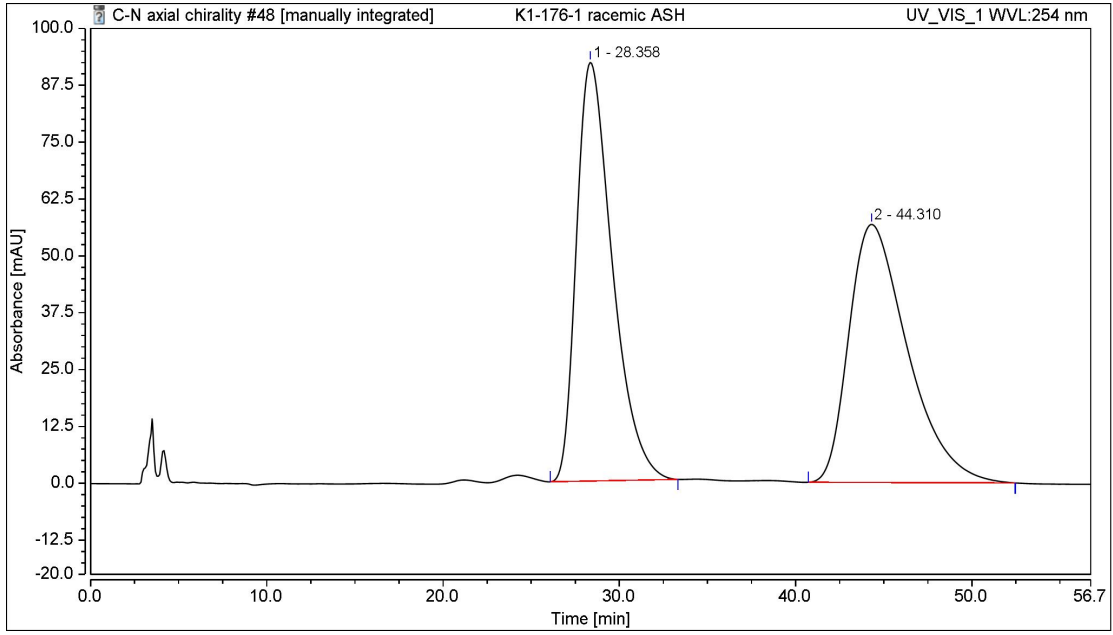

| Integration Results |           |                       |                 |                |                    |                      |
|---------------------|-----------|-----------------------|-----------------|----------------|--------------------|----------------------|
| No.                 | Peak Name | Retention Time<br>min | Area<br>mAU*min | Height<br>mAU  | Relative Area<br>% | Relative Height<br>% |
| 1                   |           | 28.358                | 217.073         | 92.041         | 49.82              | 61.86                |
| 2                   |           | 44.310                | 218.629         | 56.745         | 50.18              | 38.14                |
| <b>Total:</b>       |           |                       | <b>435.702</b>  | <b>148.787</b> | <b>100.00</b>      | <b>100.00</b>        |

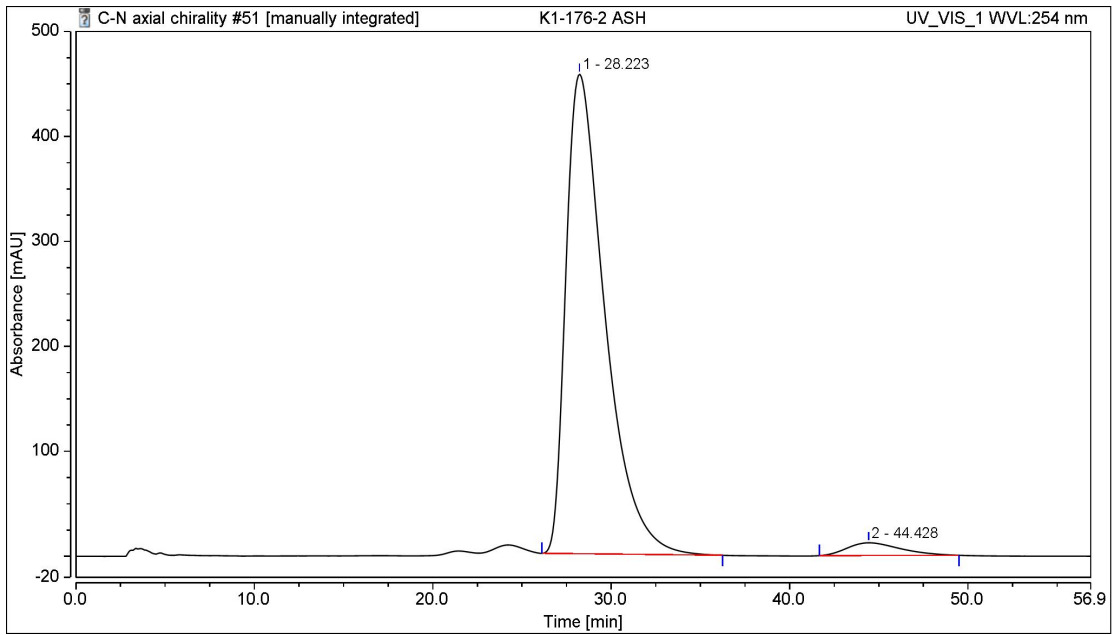

| Integration Results |           |                       |                 |                |                    |                      |
|---------------------|-----------|-----------------------|-----------------|----------------|--------------------|----------------------|
| No.                 | Peak Name | Retention Time<br>min | Area<br>mAU*min | Height<br>mAU  | Relative Area<br>% | Relative Height<br>% |
| 1                   |           | 28.223                | 1155.721        | 456.839        | 96.51              | 97.42                |
| 2                   |           | 44.428                | 41.781          | 12.111         | 3.49               | 2.58                 |
| <b>Total:</b>       |           |                       | <b>1197.502</b> | <b>468.950</b> | <b>100.00</b>      | <b>100.00</b>        |

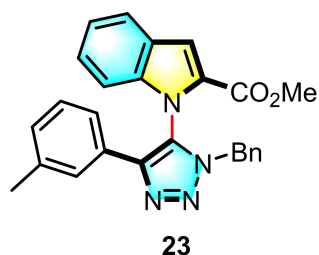

White solid, 33.8 mg, 80% yield, 97:3 er. [Chiral HPLC analysis of the product: Daicel Chiralpak AS-H 250X4.6 mm 5u column; *n*-hexane/2-propanol = 80/20, flow rate = 1.0 mL/min,  $\lambda = 254$  nm,  $t$  (major) = 12.22 min,  $t$  (minor) = 20.39 min].  $[\alpha]_D^{26} = -74.0^\circ$  ( $c = 2.0$ ,  $\text{CHCl}_3$ ).  **$^1\text{H NMR}$  (500 MHz,  $\text{CDCl}_3$ )**  $\delta$  7.73 (d,  $J = 7.9$  Hz, 1H), 7.56 (s, 1H), 7.34 (s, 1H), 7.20 (t,  $J = 7.6$  Hz, 1H), 7.13 (td,  $J = 7.2, 2.1$  Hz, 2H), 7.07 (t,  $J = 7.3$  Hz, 2H), 6.99 (d,  $J = 6.4$  Hz, 2H), 6.91 (d,  $J = 7.2$  Hz, 2H), 6.85 (t,  $J = 4.4$  Hz, 1H), 6.58 (d,  $J = 8.4$  Hz, 1H), 5.24 (s, 2H), 3.58 (s, 3H), 2.19 (s, 3H).  **$^{13}\text{C NMR}$  (126 MHz,  $\text{CDCl}_3$ )**  $\delta$  159.4, 141.4, 138.3, 137.2, 132.4, 128.2, 128.0, 127.5, 127.5, 127.5, 127.3, 127.3, 127.2, 125.9, 125.7, 125.4, 121.8, 121.6, 121.2, 113.2, 109.9, 51.3, 50.8, 20.3. **HRMS (ESI,  $m/z$ )** Calcd for  $\text{C}_{26}\text{H}_{23}\text{N}_4\text{O}_2$  ( $\text{M}+\text{H}$ ) $^+$ : 423.1816; Found: 423.1811.

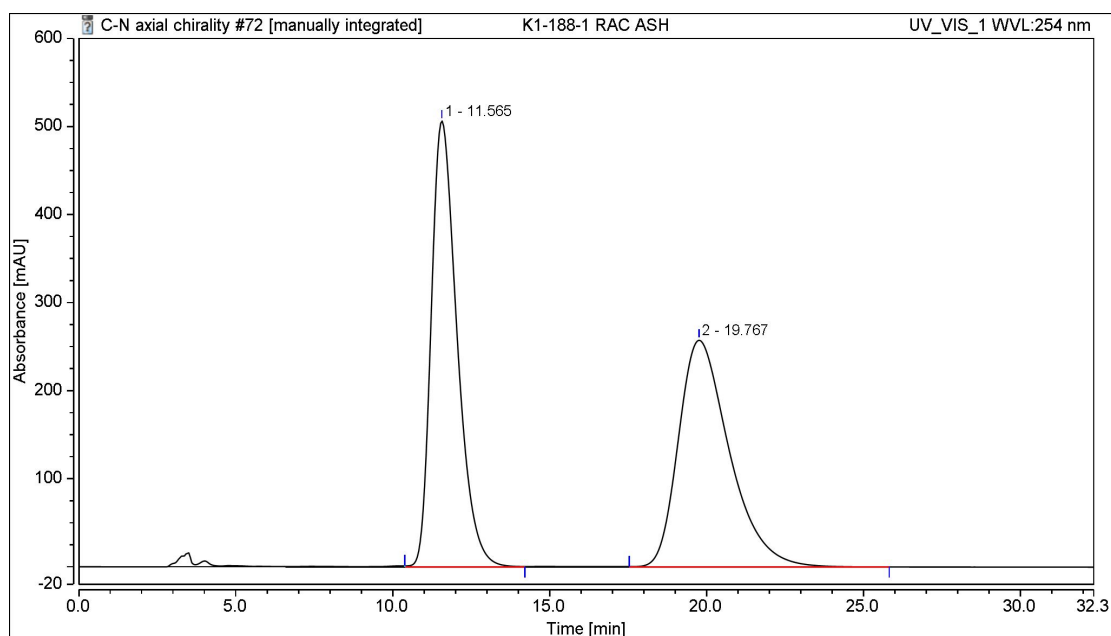

| Integration Results |           |                    |                |                |                 |                   |
|---------------------|-----------|--------------------|----------------|----------------|-----------------|-------------------|
| No.                 | Peak Name | Retention Time min | Area mAU*min   | Height mAU     | Relative Area % | Relative Height % |
| 1                   |           | 11.565             | 483.400        | 506.594        | 50.00           | 66.31             |
| 2                   |           | 19.767             | 483.424        | 257.436        | 50.00           | 33.69             |
| <b>Total:</b>       |           |                    | <b>966.823</b> | <b>764.030</b> | <b>100.00</b>   | <b>100.00</b>     |

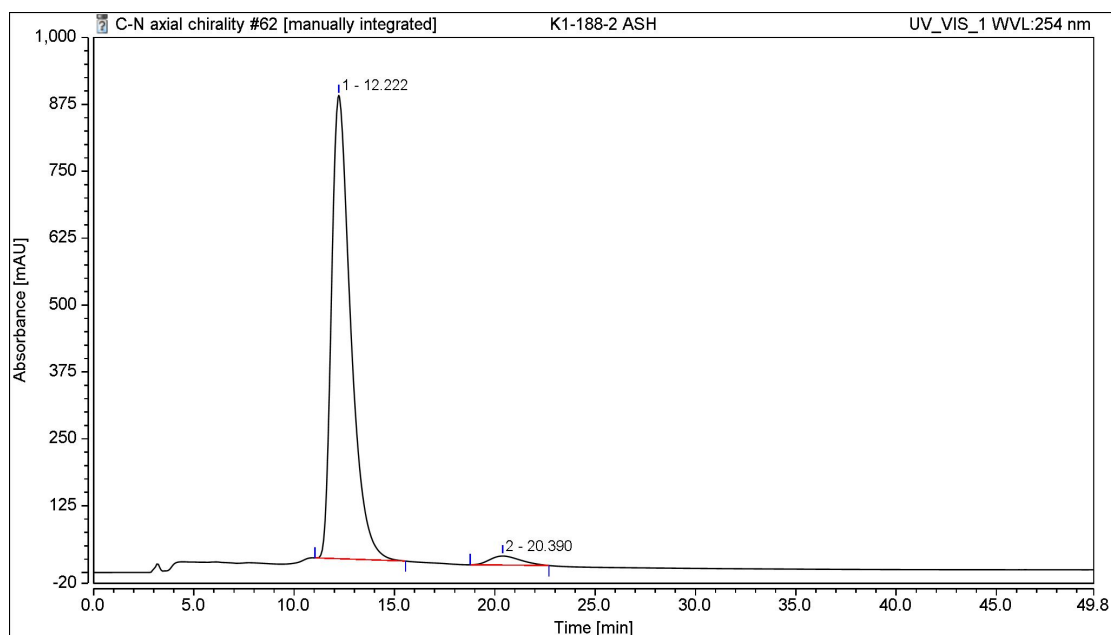

| Integration Results |           |                       |                 |                |                    |                      |
|---------------------|-----------|-----------------------|-----------------|----------------|--------------------|----------------------|
| No.                 | Peak Name | Retention Time<br>min | Area<br>mAU*min | Height<br>mAU  | Relative Area<br>% | Relative Height<br>% |
| 1                   |           | 12.222                | 960.617         | 865.905        | 96.91              | 98.08                |
| 2                   |           | 20.390                | 30.592          | 16.987         | 3.09               | 1.92                 |
| <b>Total:</b>       |           |                       | <b>991.209</b>  | <b>882.892</b> | <b>100.00</b>      | <b>100.00</b>        |

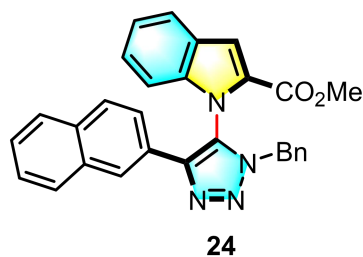

White solid, 44.9 mg, 98% yield, 98:2 yield. [Chiral HPLC analysis of the product: Daicel Chiralpak AS-H 250X4.6 mm 5u column; *n*-hexane/2-propanol = 80/20, flow rate = 1.0 mL/min,  $\lambda$  = 254 nm,  $t$  (major) = 10.14 min,  $t$  (minor) = 12.17 min].  $[\alpha]_D^{26} = -220.4^\circ$  ( $c = 1.4$ ,  $\text{CHCl}_3$ ).  **$^1\text{H NMR}$  (500 MHz,  $\text{CDCl}_3$ )**  $\delta$  7.77 (d,  $J = 8.1$  Hz, 1H), 7.73 (s, 1H), 7.68 (d,  $J = 7.3$  Hz, 1H), 7.63 (d,  $J = 8.7$  Hz, 1H), 7.60 (s, 1H), 7.55 (d,  $J = 7.3$  Hz, 1H), 7.43-7.33 (m, 3H), 7.22 (t,  $J = 7.3$  Hz, 1H), 7.13 (td,  $J = 7.1, 1.9$  Hz, 2H), 7.09 (t,  $J = 7.4$  Hz, 2H), 6.95 (d,  $J = 7.2$  Hz, 2H), 6.63 (d,  $J = 8.4$  Hz, 1H), 5.29 (s, 2H), 3.58 (s, 3H).  **$^{13}\text{C NMR}$  (126 MHz,  $\text{CDCl}_3$ )**  $\delta$  159.4, 141.0, 138.6, 138.5, 137.2, 131.9, 128.9, 128.4, 127.4, 127.2, 126.2, 125.8, 125.4, 124.5, 122.2, 122.1, 121.7, 113.2, 110.2, 51.0, 20.1. **HRMS (ESI,  $m/z$ )** Calcd for  $\text{C}_{29}\text{H}_{23}\text{N}_4\text{O}_2$  ( $\text{M}+\text{H}$ ) $^+$ : 459.1816; Found: 459.1824.

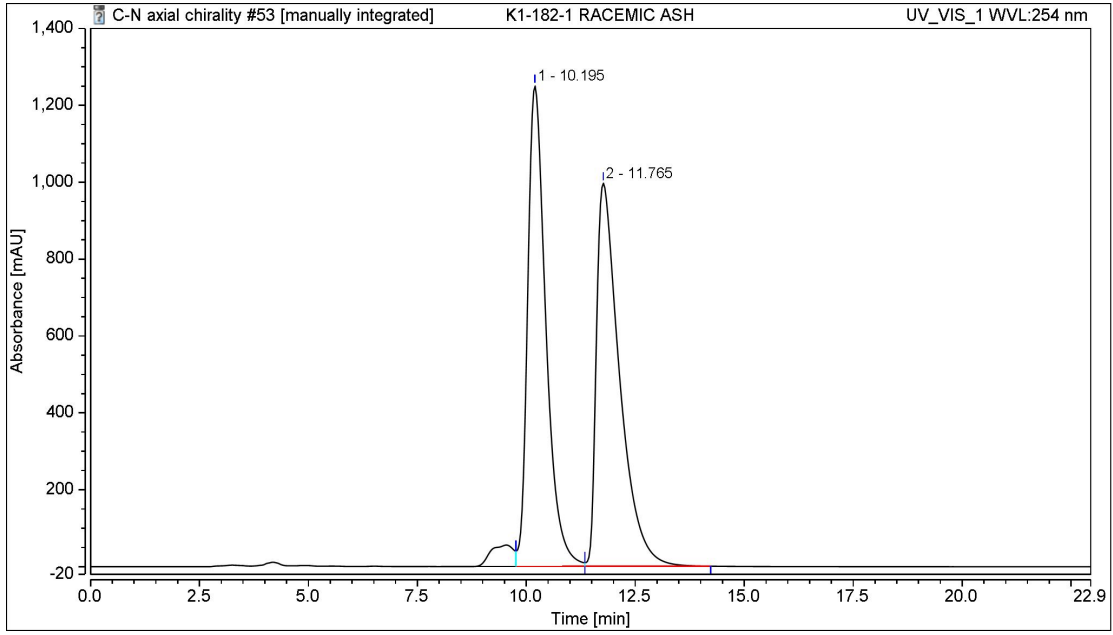

| Integration Results |           |                    |                 |                 |                 |                   |
|---------------------|-----------|--------------------|-----------------|-----------------|-----------------|-------------------|
| No.                 | Peak Name | Retention Time min | Area mAU*min    | Height mAU      | Relative Area % | Relative Height % |
| 1                   |           | 10.195             | 607.064         | 1250.628        | 49.74           | 55.65             |
| 2                   |           | 11.765             | 613.343         | 996.832         | 50.26           | 44.35             |
| <b>Total:</b>       |           |                    | <b>1220.407</b> | <b>2247.460</b> | <b>100.00</b>   | <b>100.00</b>     |

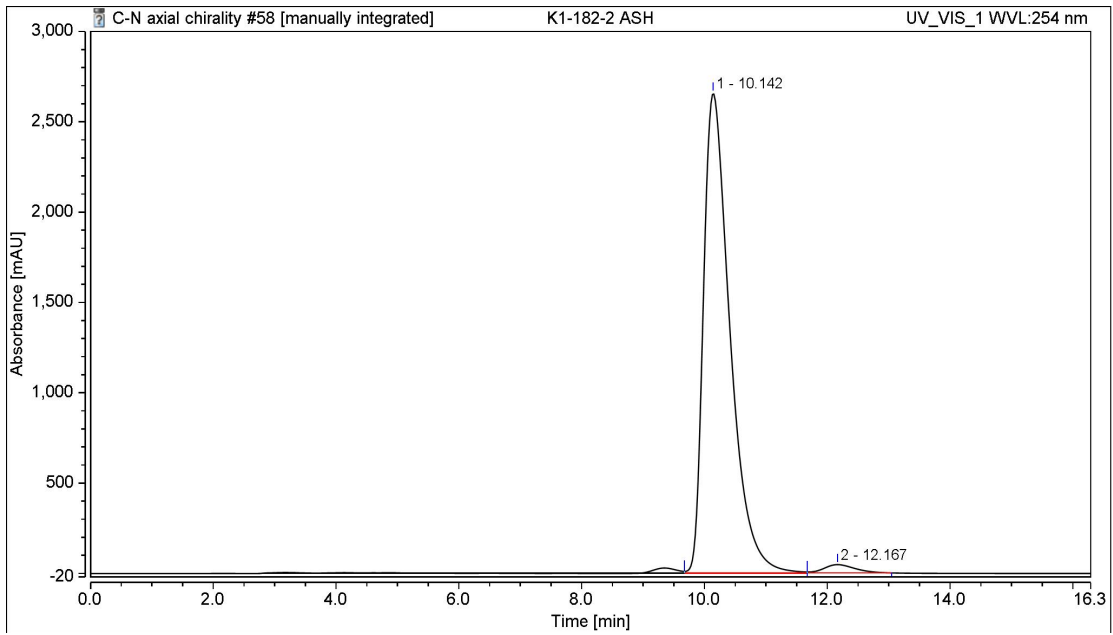

| Integration Results |           |                    |                 |                 |                 |                   |
|---------------------|-----------|--------------------|-----------------|-----------------|-----------------|-------------------|
| No.                 | Peak Name | Retention Time min | Area mAU*min    | Height mAU      | Relative Area % | Relative Height % |
| 1                   |           | 10.142             | 1326.548        | 2655.841        | 98.00           | 98.29             |
| 2                   |           | 12.167             | 27.134          | 46.121          | 2.00            | 1.71              |
| <b>Total:</b>       |           |                    | <b>1353.683</b> | <b>2701.962</b> | <b>100.00</b>   | <b>100.00</b>     |

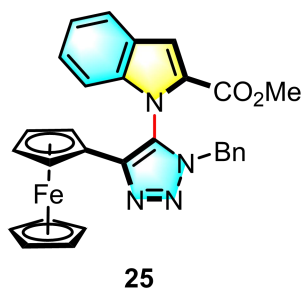

Brownish red solid, 50.6 mg, 98% yield, 98.5:1.5 er. [Chiral HPLC analysis of the product: Phenomenex 00G-4457-E0 250X4.6 mm 5u column; *n*-hexane/2-propanol = 90/10, flow rate = 1.0 mL/min,  $\lambda$  = 254 nm, *t* (major) = 56.36 min, *t* (minor) = 42.04 min].  $[\alpha]_D^{26} = -125.3^\circ$  (*c* = 1.7, CHCl<sub>3</sub>). <sup>1</sup>H NMR (500 MHz, CDCl<sub>3</sub>)  $\delta$  7.73 (d, *J* = 8.1 Hz, 1H), 7.58 (d, *J* = 1.1 Hz, 1H), 7.21-7.17 (m, 1H), 7.13-7.07 (m, 2H), 7.04 (td, *J* = 6.6, 1.7 Hz, 2H), 6.93 (d, *J* = 6.9 Hz, 2H), 6.47 (dd, *J* = 8.4, 0.9 Hz, 1H), 5.41 (d, *J* = 14.8 Hz, 1H), 5.17 (d, *J* = 14.8 Hz, 1H), 4.37 (dt, *J* = 2.6, 1.3 Hz, 1H), 4.09 (td, *J* = 2.6, 1.4 Hz, 1H), 3.99 (td, *J* = 2.6, 1.4 Hz, 1H), 3.94 (s, 5H), 3.72 (s, 3H), 3.69 (dt, *J* = 2.6, 1.3 Hz, 1H). <sup>13</sup>C NMR (126 MHz, CDCl<sub>3</sub>)  $\delta$  159.7, 141.8, 138.6, 132.6, 127.4, 127.4, 127.3, 127.2, 125.9, 125.7, 125.6, 121.7, 121.5, 112.9, 110.0, 72.3, 68.3, 67.6, 67.6, 65.0, 64.4, 51.3, 50.9. HRMS (ESI, *m/z*) Calcd for C<sub>29</sub>H<sub>25</sub>FeN<sub>4</sub>O<sub>2</sub> (M+H)<sup>+</sup>: 517.1321; Found: 517.1334.

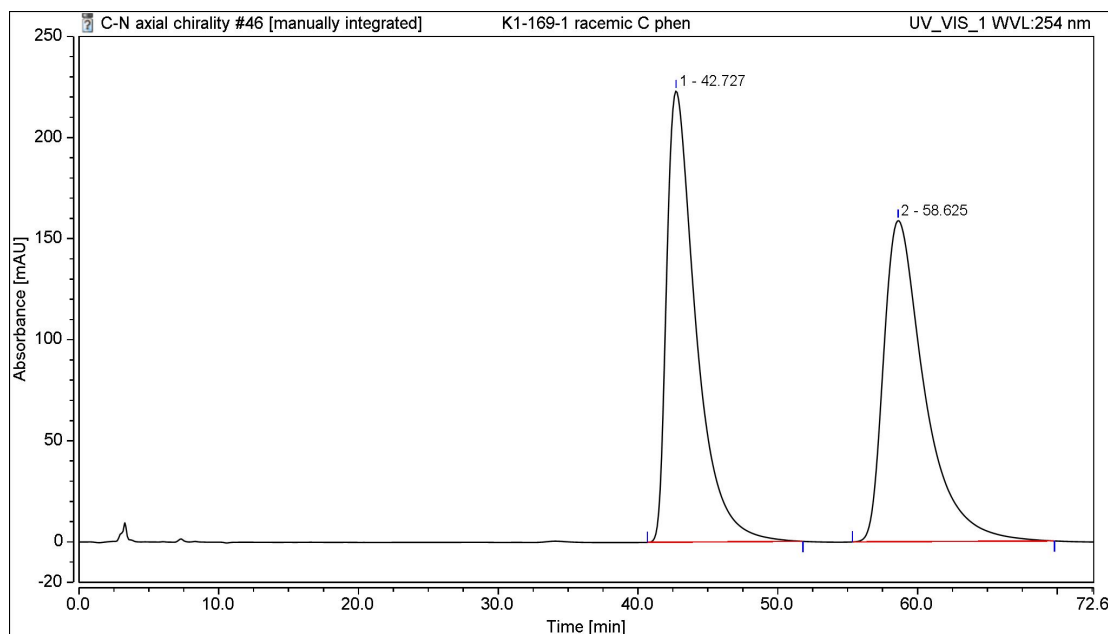

| Integration Results |           |                    |                 |                |                 |                   |
|---------------------|-----------|--------------------|-----------------|----------------|-----------------|-------------------|
| No.                 | Peak Name | Retention Time min | Area mAU*min    | Height mAU     | Relative Area % | Relative Height % |
| 1                   |           | 42.727             | 542.974         | 223.229        | 50.20           | 58.42             |
| 2                   |           | 58.625             | 538.570         | 158.865        | 49.80           | 41.58             |
| <b>Total:</b>       |           |                    | <b>1081.544</b> | <b>382.093</b> | <b>100.00</b>   | <b>100.00</b>     |

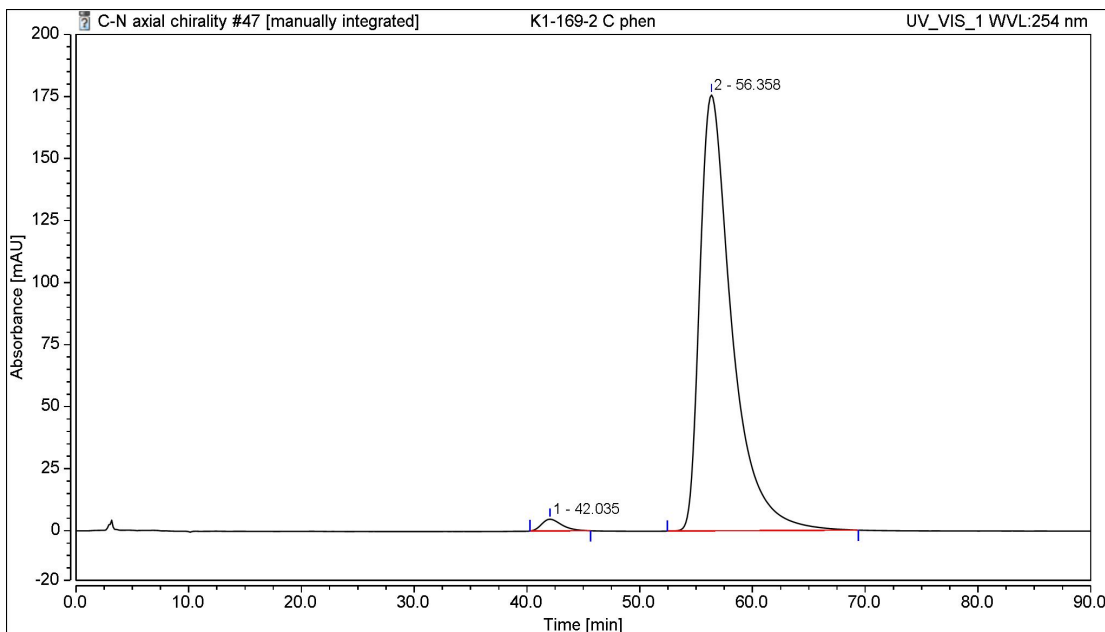

| Integration Results |           |                    |                |                |                 |                   |
|---------------------|-----------|--------------------|----------------|----------------|-----------------|-------------------|
| No.                 | Peak Name | Retention Time min | Area mAU*min   | Height mAU     | Relative Area % | Relative Height % |
| 1                   |           | 42.035             | 9.856          | 4.744          | 1.67            | 2.63              |
| 2                   |           | 56.358             | 579.342        | 175.688        | 98.33           | 97.37             |
| <b>Total:</b>       |           |                    | <b>589.198</b> | <b>180.432</b> | <b>100.00</b>   | <b>100.00</b>     |

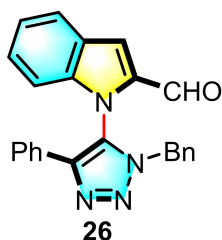

White solid, 37.0 mg, 98% yield, 98:2 er. [Chiral HPLC analysis of the product: Daicel Chiralpak AS-H 250X4.6 mm 5u column; *n*-hexane/2-propanol = 85/15, flow rate = 1.0 mL/min,  $\lambda$  = 254 nm,  $t$  (major) = 30.87 min,  $t$  (minor) = 23.35 min].  $[\alpha]_D^{26} = -194.4^\circ$  ( $c = 1.1$ ,  $\text{CHCl}_3$ ).  $^1\text{H NMR}$  (500 MHz,  $\text{CDCl}_3$ )  $\delta$  9.65 (s, 1H), 7.78 (d,  $J = 7.8$  Hz, 1H), 7.51 (s, 1H), 7.30-7.13 (m, 7H), 7.09 (t,  $J = 7.3$  Hz, 1H), 7.03 (t,  $J = 7.4$  Hz, 2H), 6.84 (d,  $J = 7.3$  Hz, 2H), 6.61 (d,  $J = 8.2$  Hz, 1H), 5.35 (d,  $J = 14.9$  Hz, 1H), 5.17 (d,  $J = 14.9$  Hz, 1H).  $^{13}\text{C NMR}$  (126 MHz,  $\text{CDCl}_3$ )  $\delta$  180.4, 142.4, 139.9, 135.7, 133.3, 129.4, 128.8, 128.6,



128.5, 128.5, 128.1, 128.0, 127.0, 125.6, 123.7, 123.1, 119.2, 111.1, 52.7. HRMS (ESI, m/z) Calcd for C<sub>24</sub>H<sub>19</sub>N<sub>4</sub>O (M+H)<sup>+</sup>: 379.1553; Found: 379.1537.

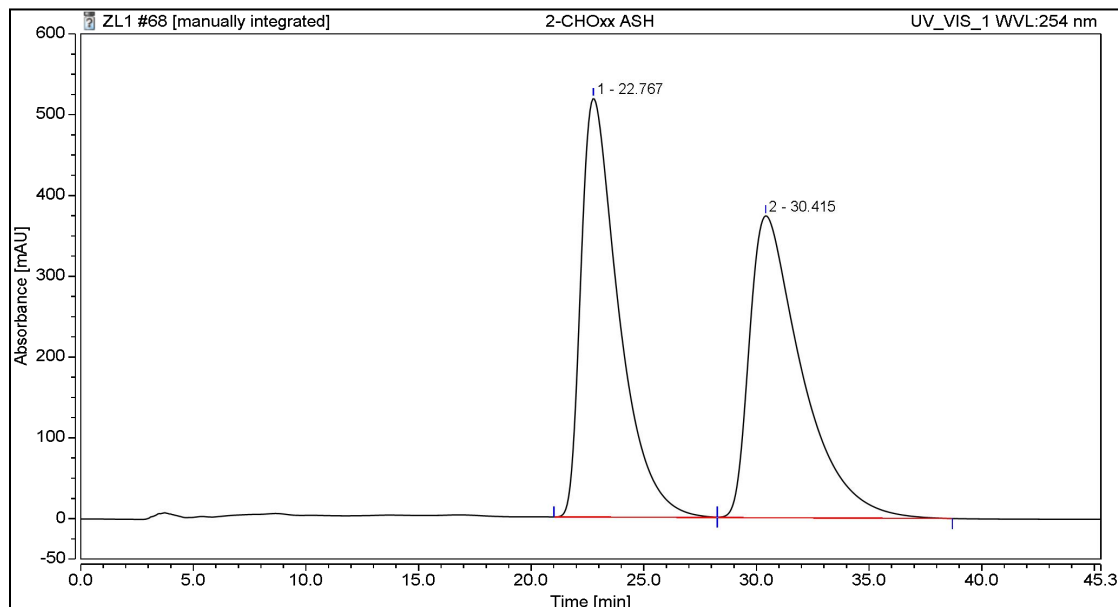

| Integration Results |           |                    |                 |                |                 |                   |
|---------------------|-----------|--------------------|-----------------|----------------|-----------------|-------------------|
| No.                 | Peak Name | Retention Time min | Area mAU*min    | Height mAU     | Relative Area % | Relative Height % |
| 1                   |           | 22.767             | 1007.468        | 518.256        | 50.05           | 58.10             |
| 2                   |           | 30.415             | 1005.392        | 373.793        | 49.95           | 41.90             |
| <b>Total:</b>       |           |                    | <b>2012.860</b> | <b>892.050</b> | <b>100.00</b>   | <b>100.00</b>     |

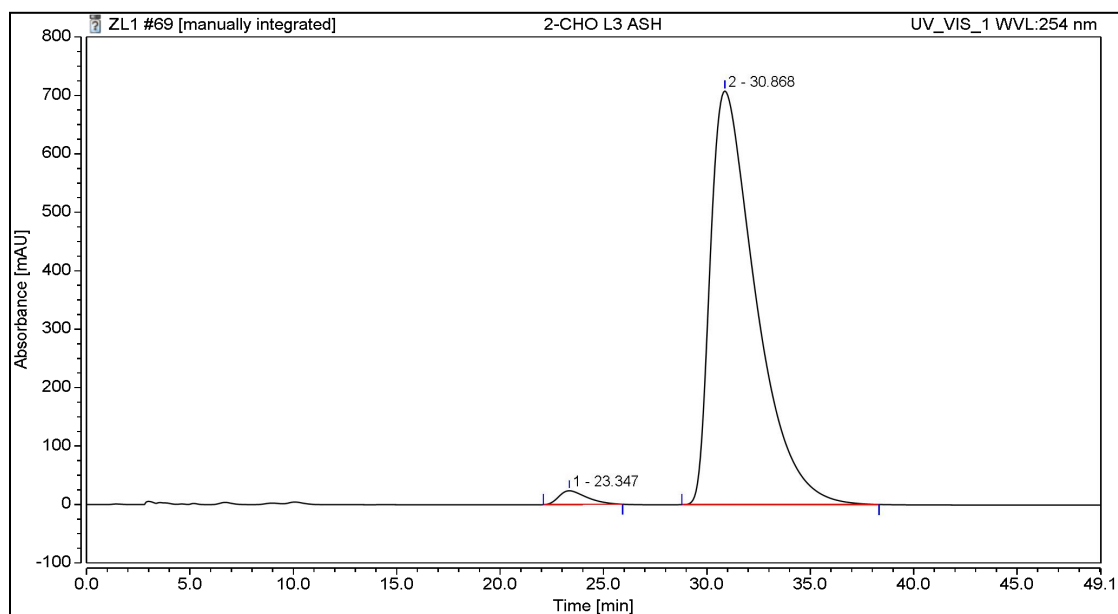

| Integration Results |           |                    |                 |                |                 |                   |
|---------------------|-----------|--------------------|-----------------|----------------|-----------------|-------------------|
| No.                 | Peak Name | Retention Time min | Area mAU*min    | Height mAU     | Relative Area % | Relative Height % |
| 1                   |           | 23.347             | 36.737          | 23.572         | 2.00            | 3.22              |
| 2                   |           | 30.868             | 1799.594        | 707.831        | 98.00           | 96.78             |
| <b>Total:</b>       |           |                    | <b>1836.330</b> | <b>731.402</b> | <b>100.00</b>   | <b>100.00</b>     |

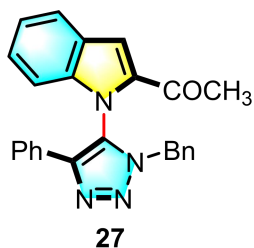

White solid, 36.4 mg, 96% yield, 99:1 er. [Chiral HPLC analysis of the product: Daicel Chiralpak AS-H 250X4.6 mm 5u column; *n*-hexane/2-propanol = 90/10, flow rate = 1.0 mL/min,  $\lambda$  = 254 nm, t (major) = 33.09 min, t (minor) = 40.31 min].  $[\alpha]_D^{26} = -161.8^\circ$  (c = 1.0, CHCl<sub>3</sub>). **<sup>1</sup>H NMR (500 MHz, CDCl<sub>3</sub>)**  $\delta$  7.73 (d, *J* = 7.9 Hz, 1H), 7.49 (s, 1H), 7.26-7.24 (m, 2H), 7.19 (t, *J* = 7.0 Hz 1H), 7.15-7.08 (m, 5H), 7.03 (t, *J* = 7.4 Hz, 2H), 6.86 (d, *J* = 7.3 Hz, 2H), 6.52 (d, *J* = 8.3 Hz, 1H), 5.31 (d, *J* = 14.9 Hz, 1H), 5.12 (d, *J* = 14.9 Hz, 1H), 2.42 (s, 3H). **<sup>13</sup>C NMR (126 MHz, CDCl<sub>3</sub>)**  $\delta$  189.0, 141.9, 139.6, 135.3, 133.5, 129.7, 129.3, 128.7, 128.6, 128.4, 128.3, 128.2, 127.8, 126.8, 125.5, 123.2, 122.8, 115.1, 111.1, 52.5, 27.0. **HRMS (ESI, m/z)** Calcd for C<sub>25</sub>H<sub>21</sub>N<sub>4</sub>O (M+H)<sup>+</sup>: 393.1710; Found: 393.1704.

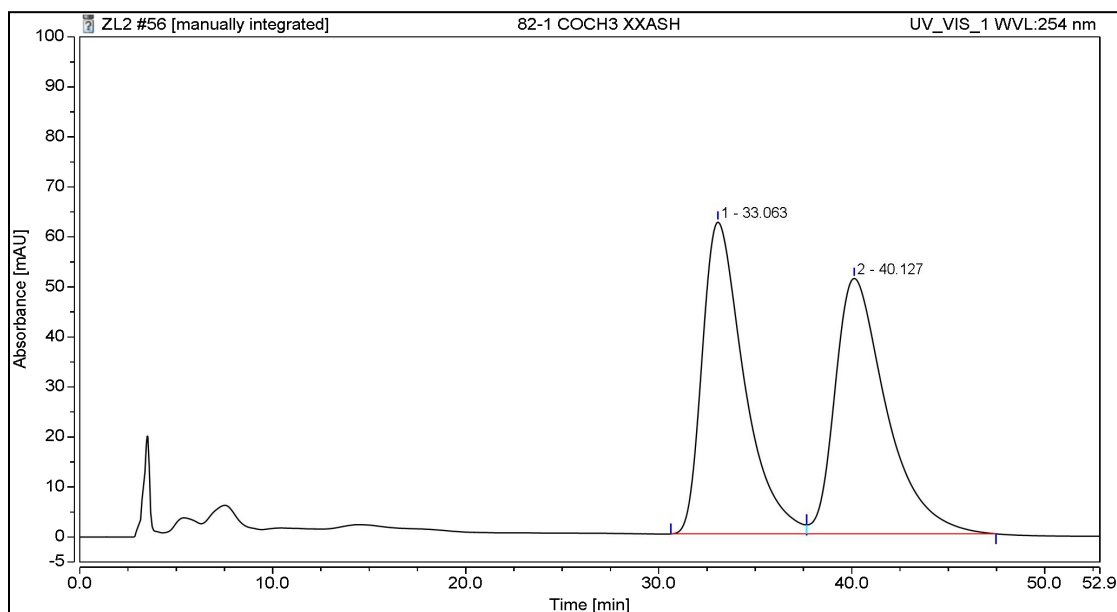

| Integration Results |           |                       |                 |                |                    |                      |
|---------------------|-----------|-----------------------|-----------------|----------------|--------------------|----------------------|
| No.                 | Peak Name | Retention Time<br>min | Area<br>mAU*min | Height<br>mAU  | Relative Area<br>% | Relative Height<br>% |
| 1                   |           | 33.063                | 156.720         | 62.363         | 49.91              | 54.97                |
| 2                   |           | 40.127                | 157.280         | 51.091         | 50.09              | 45.03                |
| <b>Total:</b>       |           |                       | <b>314.000</b>  | <b>113.454</b> | <b>100.00</b>      | <b>100.00</b>        |

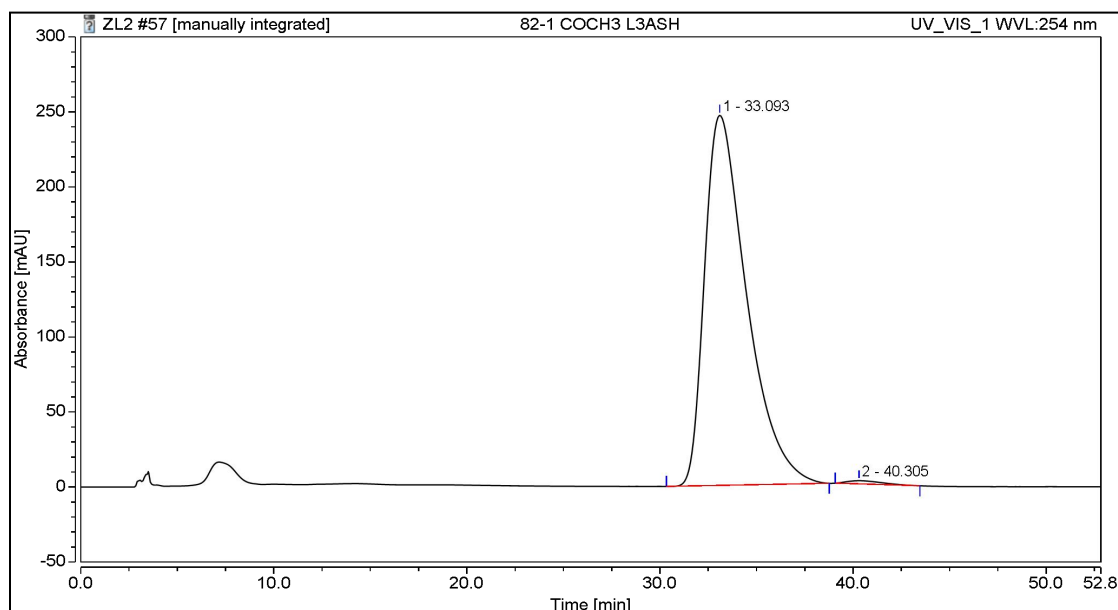

| Integration Results |           |                       |                 |                |                    |                      |
|---------------------|-----------|-----------------------|-----------------|----------------|--------------------|----------------------|
| No.                 | Peak Name | Retention Time<br>min | Area<br>mAU*min | Height<br>mAU  | Relative Area<br>% | Relative Height<br>% |
| 1                   |           | 33.093                | 623.523         | 246.692        | 99.28              | 99.15                |
| 2                   |           | 40.305                | 4.501           | 2.119          | 0.72               | 0.85                 |
| <b>Total:</b>       |           |                       | <b>628.024</b>  | <b>248.811</b> | <b>100.00</b>      | <b>100.00</b>        |

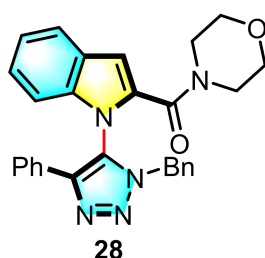

White solid, 44.9 mg, 97% yield, 97:3 er. [Chiral HPLC analysis of the product: Daicel Chiralcel OD-H 250X4.6 mm 5u column; *n*-hexane/2-propanol = 70/30, flow rate = 1.0 mL/min,  $\lambda = 254$  nm,  $t$  (major) = 12.37 min,  $t$  (minor) = 9.45 min].  $[\alpha]_D^{26} = -65.1^\circ$  ( $c = 1.0$ ,  $\text{CHCl}_3$ ).  **$^1\text{H NMR}$  (500 MHz,  $\text{CDCl}_3$ )**  $\delta$  7.66 (d,  $J = 8.0$  Hz, 1H), 7.18-7.13 (m, 7H), 7.11-7.05 (m, 4H), 6.97 (t,  $J = 8.2$  Hz, 1H), 6.85 (s, 1H), 6.35 (d,  $J = 9.0$  Hz, 1H), 5.69 (d,  $J = 14.9$  Hz, 1H), 5.37 (d,  $J = 14.9$  Hz, 1H), 4.08-3.00 (m, 8H).  **$^{13}\text{C NMR}$  (126 MHz,  $\text{CDCl}_3$ )**  $\delta$  161.3, 142.6, 138.4, 134.0, 131.9, 129.6, 128.9, 128.7, 128.6, 128.5, 128.5, 128.4, 126.8, 125.6, 125.4, 122.4, 121.9, 111.0, 107.8, 66.6, 52.5. **HRMS (ESI,  $m/z$ )** Calcd for  $\text{C}_{28}\text{H}_{26}\text{N}_5\text{O}_2$  ( $\text{M}+\text{H}$ ) $^+$ : 464.2081; Found: 464.2074.

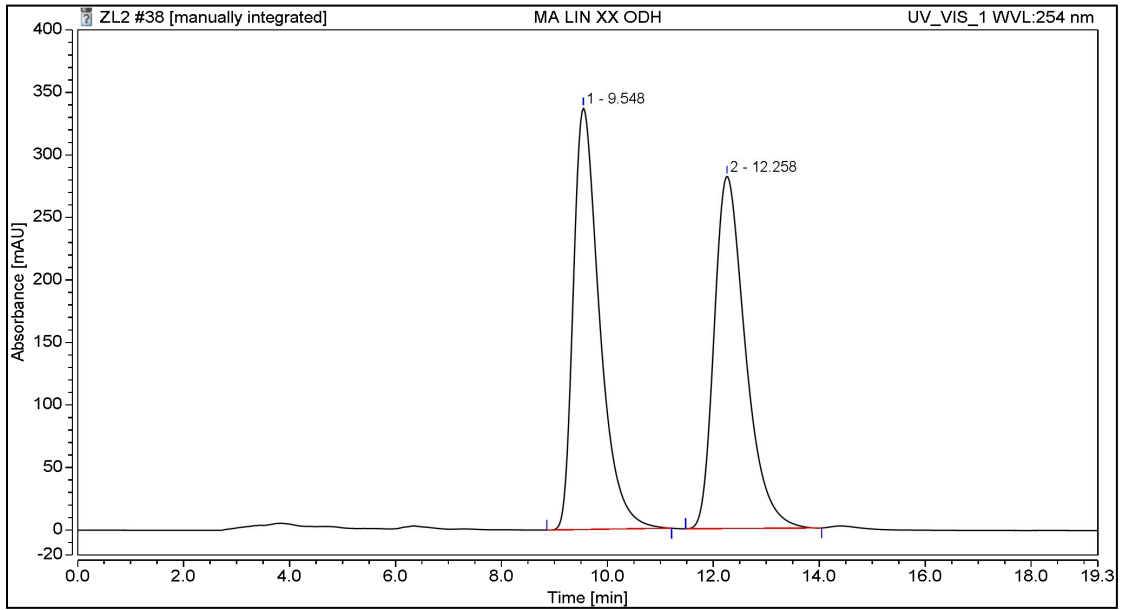

| Integration Results |           |                       |                 |                |                    |                      |
|---------------------|-----------|-----------------------|-----------------|----------------|--------------------|----------------------|
| No.                 | Peak Name | Retention Time<br>min | Area<br>mAU*min | Height<br>mAU  | Relative Area<br>% | Relative Height<br>% |
| 1                   |           | 9.548                 | 193.632         | 337.147        | 50.12              | 54.46                |
| 2                   |           | 12.258                | 192.681         | 281.877        | 49.88              | 45.54                |
| <b>Total:</b>       |           |                       | <b>386.313</b>  | <b>619.024</b> | <b>100.00</b>      | <b>100.00</b>        |

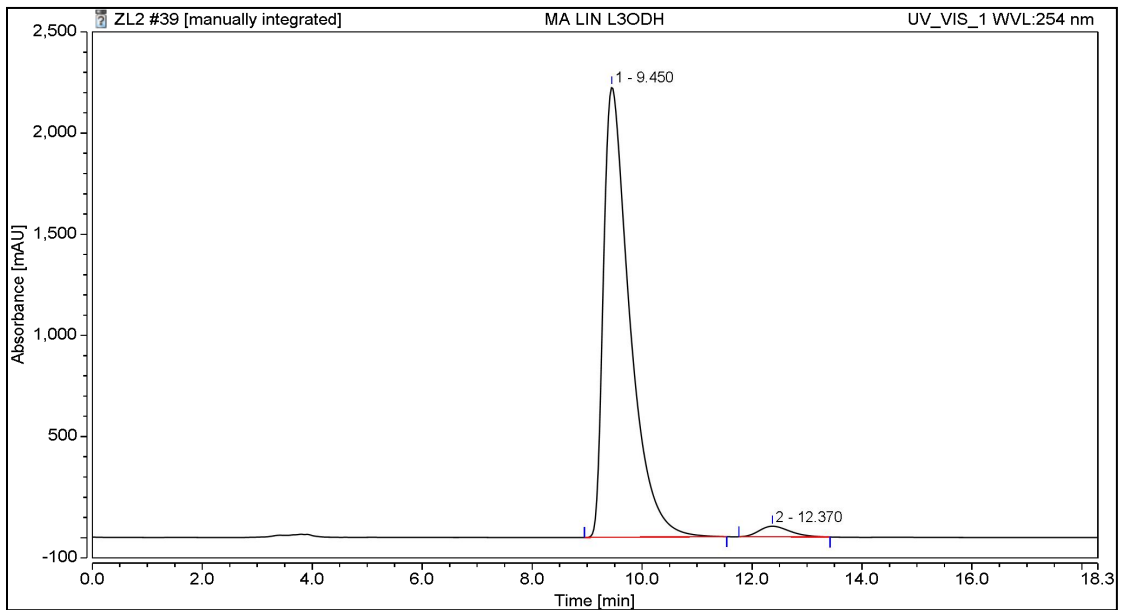

| Integration Results |           |                       |                 |                 |                    |                      |
|---------------------|-----------|-----------------------|-----------------|-----------------|--------------------|----------------------|
| No.                 | Peak Name | Retention Time<br>min | Area<br>mAU*min | Height<br>mAU   | Relative Area<br>% | Relative Height<br>% |
| 1                   |           | 9.450                 | 1228.696        | 2226.605        | 97.29              | 97.69                |
| 2                   |           | 12.370                | 34.281          | 52.637          | 2.71               | 2.31                 |
| <b>Total:</b>       |           |                       | <b>1262.977</b> | <b>2279.242</b> | <b>100.00</b>      | <b>100.00</b>        |

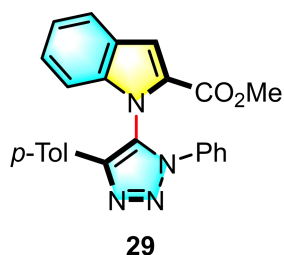

White solid, 40.0 mg, 98% yield, 98:2 er. [Chiral HPLC analysis of the product: Daicel Chiralcel OD-H 250X4.6 mm 5u column; n-hexane/2-propanol = 90/10, flow rate = 0.2 mL/min,  $\lambda = 254$  nm, t (major) = 70.27 min, t (minor) = 61.75 min].  $[\alpha]_D^{26} = -99.0^\circ$  (c = 0.9, CHCl<sub>3</sub>). **<sup>1</sup>H NMR (500 MHz, CDCl<sub>3</sub>)**  $\delta$  7.75 (d, *J* = 7.9 Hz, 1H), 7.48 (s, 1H), 7.36-7.24 (m, 7H), 7.19 (d, *J* = 8.1 Hz, 2H), 7.04-7.01 (m, 3H), 3.64 (s, 3H), 2.26 (s, 3H). **<sup>13</sup>C NMR (126 MHz, CDCl<sub>3</sub>)**  $\delta$  159.4, 141.1, 138.5, 137.3, 134.4, 128.5, 128.3, 128.3, 127.4, 127.3, 126.2, 125.9, 125.3, 124.5, 122.4, 122.1, 121.8, 113.3, 110.2, 51.0, 20.2. **HRMS (ESI, m/z)** Calcd for C<sub>25</sub>H<sub>21</sub>N<sub>4</sub>O<sub>2</sub> (M+H)<sup>+</sup>: 409.1659; Found: 409.1658.

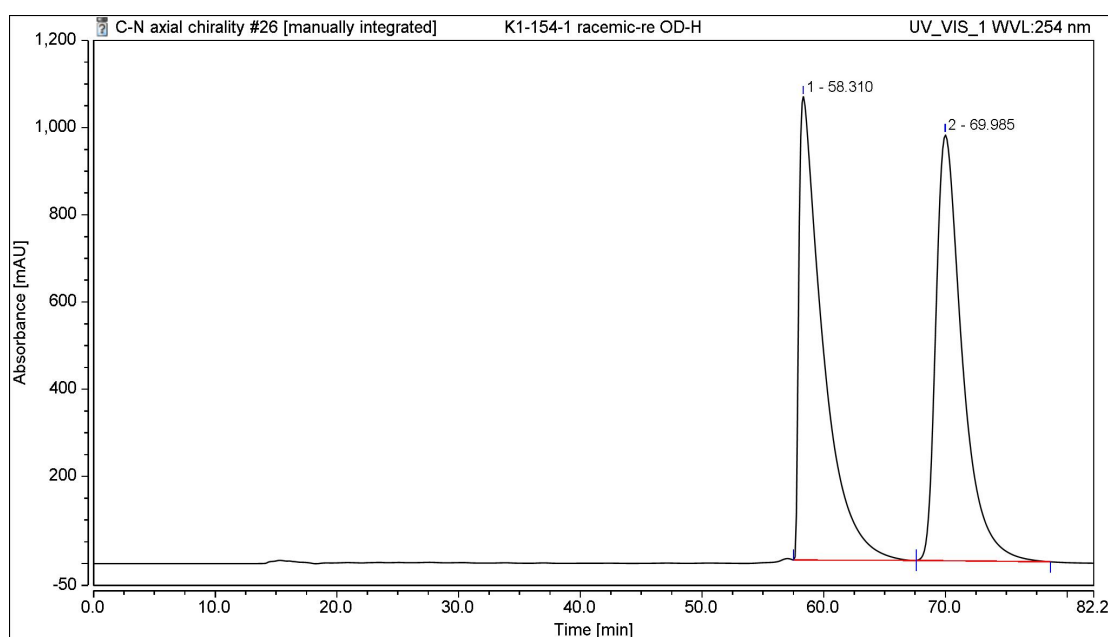

| Integration Results |           |                       |                 |                 |                    |                      |
|---------------------|-----------|-----------------------|-----------------|-----------------|--------------------|----------------------|
| No.                 | Peak Name | Retention Time<br>min | Area<br>mAU*min | Height<br>mAU   | Relative Area<br>% | Relative Height<br>% |
| 1                   |           | 58.310                | 2411.646        | 1063.042        | 49.61              | 52.12                |
| 2                   |           | 69.985                | 2449.099        | 976.574         | 50.39              | 47.88                |
| <b>Total:</b>       |           |                       | <b>4860.745</b> | <b>2039.616</b> | <b>100.00</b>      | <b>100.00</b>        |

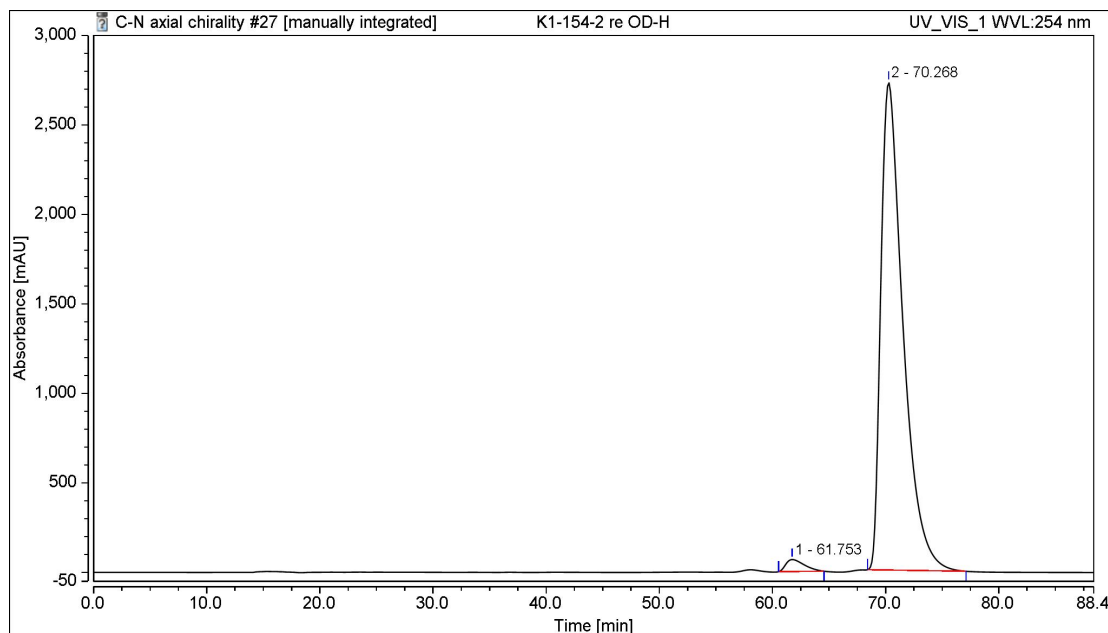

| Integration Results |           |                       |                 |                 |                    |                      |
|---------------------|-----------|-----------------------|-----------------|-----------------|--------------------|----------------------|
| No.                 | Peak Name | Retention Time<br>min | Area<br>mAU*min | Height<br>mAU   | Relative Area<br>% | Relative Height<br>% |
| 1                   |           | 61.753                | 126.252         | 67.076          | 2.00               | 2.40                 |
| 2                   |           | 70.268                | 6194.434        | 2724.741        | 98.00              | 97.60                |
| <b>Total:</b>       |           |                       | <b>6320.686</b> | <b>2791.816</b> | <b>100.00</b>      | <b>100.00</b>        |

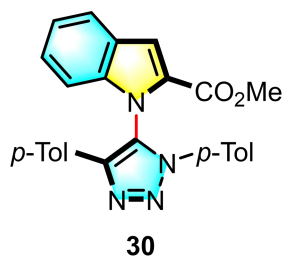

White solid, 41.0 mg, 97% yield, 99:1 er. [Chiral HPLC analysis of the product: Daicel Chiralcel OD-H 250X4.6 mm 5u column; n-hexane/2-propanol = 90/10, flow rate = 0.2 mL/min,  $\lambda = 254$  nm, t (major) = 62.82 min, t (minor) = 69.78 min].  $[\alpha]_D^{26} = -67.4^\circ$  (c = 1.2, CHCl<sub>3</sub>). **<sup>1</sup>H NMR (500 MHz, CDCl<sub>3</sub>)**  $\delta$  7.75 (d, *J* = 7.9 Hz, 1H), 7.48 (s, 1H), 7.33 (t, *J* = 7.7 Hz, 1H), 7.28-7.24 (m, 3H), 7.09-7.00 (m, 7H), 3.65 (s, 3H), 2.28 (s, 3H), 2.25 (s, 3H). **<sup>13</sup>C NMR (126 MHz, CDCl<sub>3</sub>)**  $\delta$  159.4, 141.0, 138.6, 138.5, 137.2, 131.9, 128.9, 128.4, 127.4, 127.2, 126.2, 125.8, 125.4, 124.5, 122.2, 122.1, 121.7, 113.2, 110.2, 51.0, 20.2, 20.1. **HRMS (ESI, m/z)** Calcd for C<sub>26</sub>H<sub>23</sub>N<sub>4</sub>O<sub>2</sub> (M+H)<sup>+</sup>: 423.1816; Found: 423.1820.

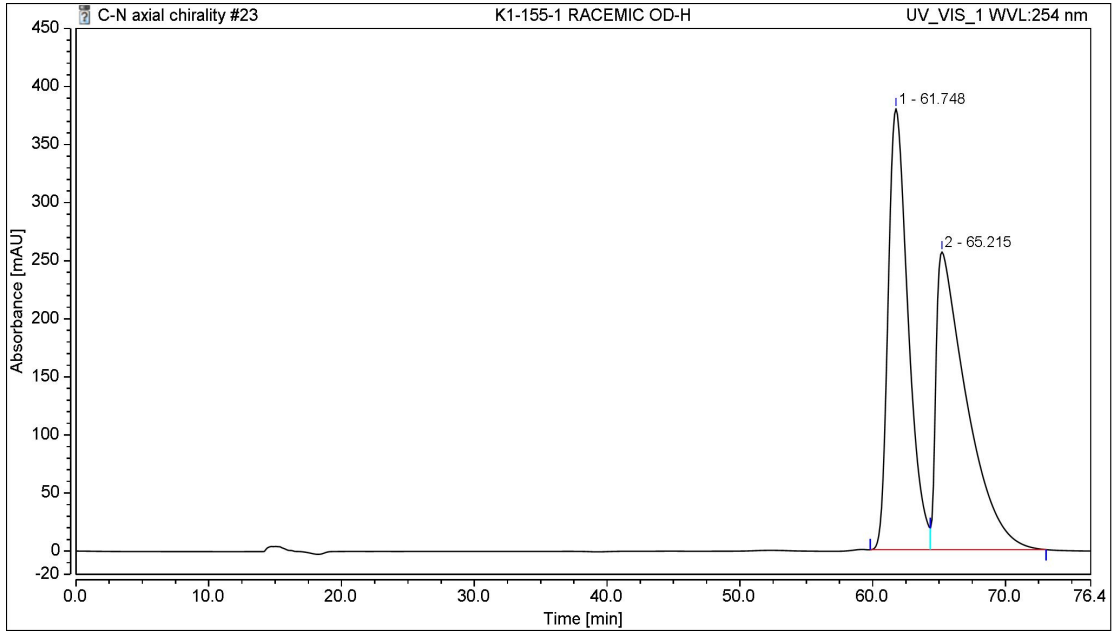

| Integration Results |           |                    |                 |                |                 |                   |
|---------------------|-----------|--------------------|-----------------|----------------|-----------------|-------------------|
| No.                 | Peak Name | Retention Time min | Area mAU*min    | Height mAU     | Relative Area % | Relative Height % |
| 1                   |           | 61.748             | 663.429         | 379.842        | 49.13           | 59.69             |
| 2                   |           | 65.215             | 686.818         | 256.504        | 50.87           | 40.31             |
| <b>Total:</b>       |           |                    | <b>1350.247</b> | <b>636.346</b> | <b>100.00</b>   | <b>100.00</b>     |

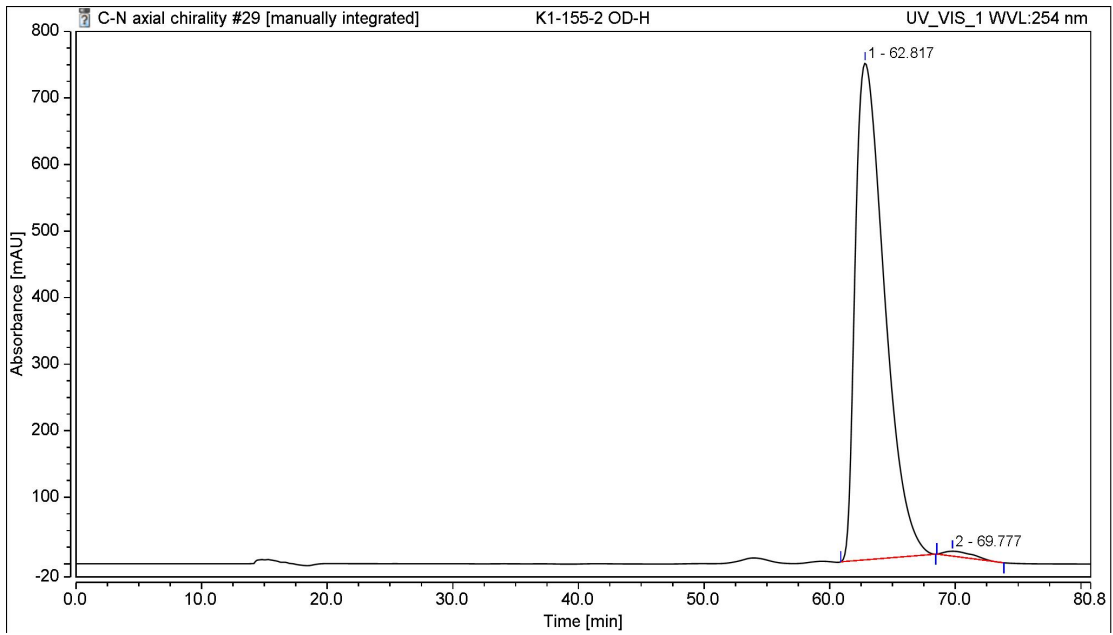

| Integration Results |           |                    |                 |                |                 |                   |
|---------------------|-----------|--------------------|-----------------|----------------|-----------------|-------------------|
| No.                 | Peak Name | Retention Time min | Area mAU*min    | Height mAU     | Relative Area % | Relative Height % |
| 1                   |           | 62.817             | 2015.548        | 746.573        | 98.95           | 99.01             |
| 2                   |           | 69.777             | 21.393          | 7.445          | 1.05            | 0.99              |
| <b>Total:</b>       |           |                    | <b>2036.941</b> | <b>754.018</b> | <b>100.00</b>   | <b>100.00</b>     |

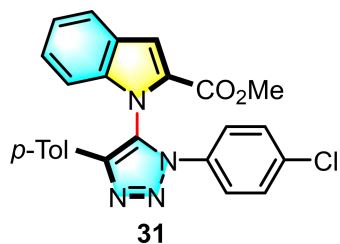

White solid, 38.9 mg, 88% yield, 97.5:2.5 er. [Chiral HPLC analysis of the product: Phenomenex 00G-4457-E0 250X4.6 mm 5u column; *n*-hexane/2-propanol = 90/10, flow rate = 0.5 mL/min,  $\lambda$  = 254 nm, *t* (major) = 80.10 min, *t* (minor) = 69.80 min].

$[\alpha]_D^{25} = -55.0^\circ$  ( $c = 0.6$ ,  $\text{CHCl}_3$ ).  **$^1\text{H NMR}$  (500 MHz,  $\text{CDCl}_3$ )**  $\delta$  7.76 (d,  $J = 7.9$  Hz, 1H), 7.49 (s, 1H), 7.33 (t,  $J = 7.6$  Hz, 1H), 7.28 (d,  $J = 7.6$  Hz, 1H), 7.24-7.22 (m, 4H), 7.13 (d,  $J = 8.8$  Hz, 2H), 7.02 (t,  $J = 7.7$  Hz, 3H), 3.65 (s, 3H), 2.24 (s, 3H).  **$^{13}\text{C NMR}$  (126 MHz,  $\text{CDCl}_3$ )**  $\delta$  160.6, 142.5, 139.6, 138.6, 135.5, 134.0, 129.7, 129.7, 128.4, 128.3, 127.5, 127.1, 126.3, 125.7, 124.7, 123.4, 123.1, 114.5, 111.2, 52.2, 21.3. **HRMS (ESI,  $m/z$ )** Calcd for  $\text{C}_{25}\text{H}_{20}\text{ClN}_4\text{O}_2$  ( $\text{M}+\text{H}$ ) $^+$ : 443.1269; Found: 443.1261.

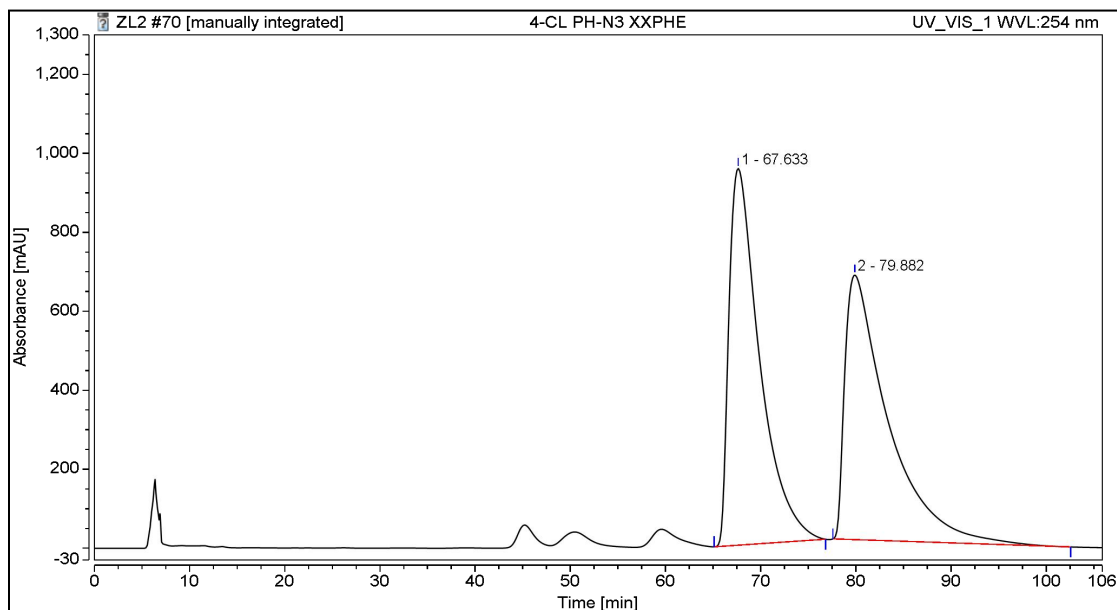

| Integration Results |           |                       |                 |                 |                    |                      |
|---------------------|-----------|-----------------------|-----------------|-----------------|--------------------|----------------------|
| No.                 | Peak Name | Retention Time<br>min | Area<br>mAU*min | Height<br>mAU   | Relative Area<br>% | Relative Height<br>% |
| 1                   |           | 67.633                | 3566.677        | 954.444         | 50.37              | 58.74                |
| 2                   |           | 79.882                | 3513.940        | 670.283         | 49.63              | 41.26                |
| <b>Total:</b>       |           |                       | <b>7080.618</b> | <b>1624.726</b> | <b>100.00</b>      | <b>100.00</b>        |



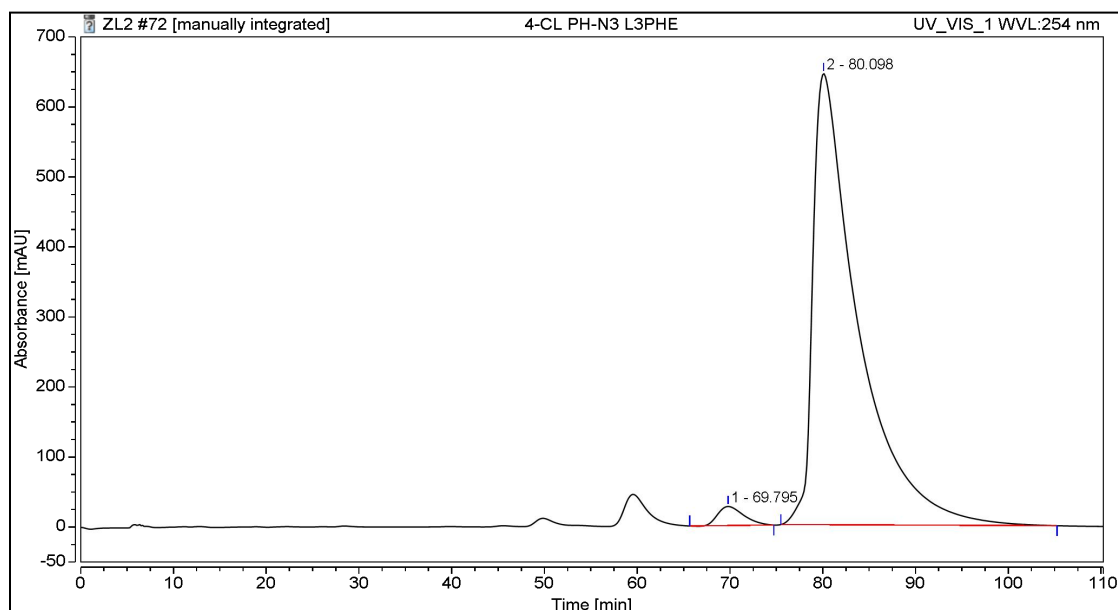

| Integration Results |           |                       |                 |                |                    |                      |
|---------------------|-----------|-----------------------|-----------------|----------------|--------------------|----------------------|
| No.                 | Peak Name | Retention Time<br>min | Area<br>mAU*min | Height<br>mAU  | Relative Area<br>% | Relative Height<br>% |
| 1                   |           | 69.795                | 88.150          | 27.264         | 2.37               | 4.06                 |
| 2                   |           | 80.098                | 3633.417        | 644.477        | 97.63              | 95.94                |
| <b>Total:</b>       |           |                       | <b>3721.567</b> | <b>671.741</b> | <b>100.00</b>      | <b>100.00</b>        |

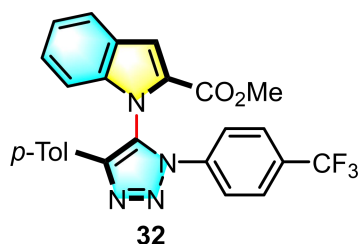

White solid, 43.8 mg, 92% yield, 96.5:3.5 er. [Chiral HPLC analysis of the product: Phenomenex 00G-4457-E0 250X4.6 mm 5u column; *n*-hexane/2-propanol = 90/10, flow rate = 0.5 mL/min,  $\lambda$  = 254 nm, *t* (major) = 40.51 min, *t* (minor) = 38.91 min].

$[\alpha]_D^{25} = -73.0^\circ$  ( $c = 0.8$ ,  $\text{CHCl}_3$ ).  **$^1\text{H NMR}$  (500 MHz,  $\text{CDCl}_3$ )**  $\delta$  7.79 (d,  $J = 7.9$  Hz, 1H), 7.59-7.50 (m, 3H), 7.34 (d,  $J = 8.4$  Hz, 3H), 7.30 (t,  $J = 7.4$  Hz, 1H), 7.23 (d,  $J = 8.2$  Hz, 2H), 7.06-7.01 (m, 3H), 3.65 (s, 3H), 2.25 (s, 3H).  **$^{13}\text{C NMR}$  (126 MHz,  $\text{CDCl}_3$ )**  $\delta$  160.5, 142.8, 139.5, 138.8, 138.4, 131.4, 131.2, 129.7, 128.3, 128.3, 127.7, 127.1, 126.8, 126.8, 126.1, 125.7, 124.7, 123.5, 123.3, 123.2, 122.5, 114.7, 111.2, 52.2, 21.3.  **$^{19}\text{F NMR}$  (471 MHz,  $\text{CDCl}_3$ )**  $\delta$  -62.81. **HRMS (ESI,  $m/z$ )** Calcd for  $\text{C}_{26}\text{H}_{20}\text{F}_3\text{N}_4\text{O}_2$  ( $\text{M}+\text{H}$ ) $^+$ : 477.1533; Found: 477.1519.

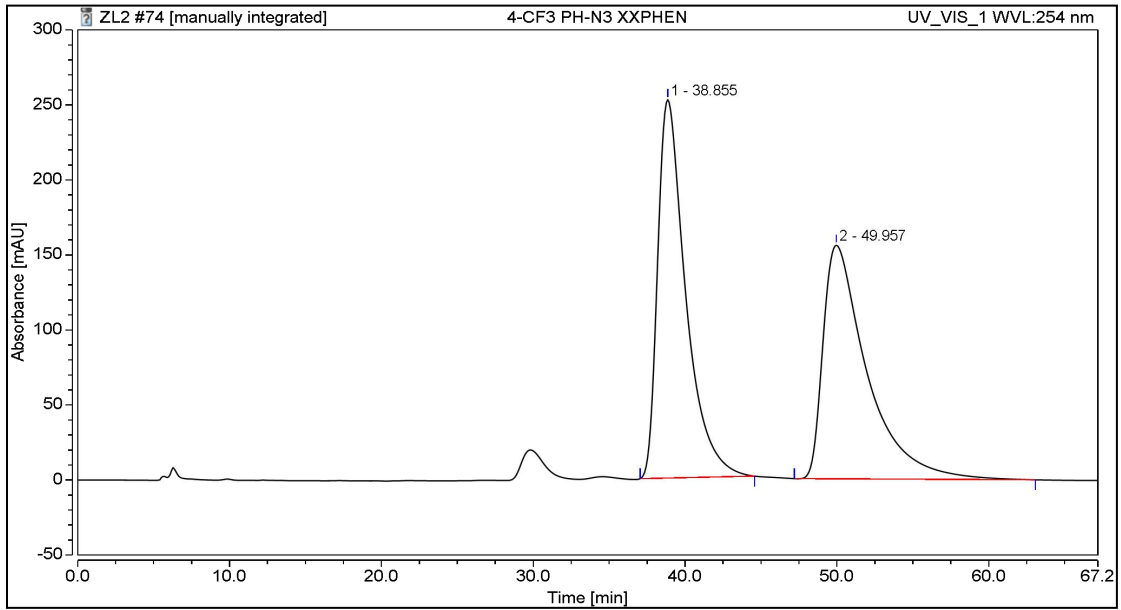

| Integration Results |           |                       |                 |                |                    |                      |
|---------------------|-----------|-----------------------|-----------------|----------------|--------------------|----------------------|
| No.                 | Peak Name | Retention Time<br>min | Area<br>mAU*min | Height<br>mAU  | Relative Area<br>% | Relative Height<br>% |
| 1                   |           | 38.855                | 540.109         | 252.272        | 50.90              | 61.83                |
| 2                   |           | 49.957                | 521.102         | 155.737        | 49.10              | 38.17                |
| <b>Total:</b>       |           |                       | <b>1061.211</b> | <b>408.009</b> | <b>100.00</b>      | <b>100.00</b>        |

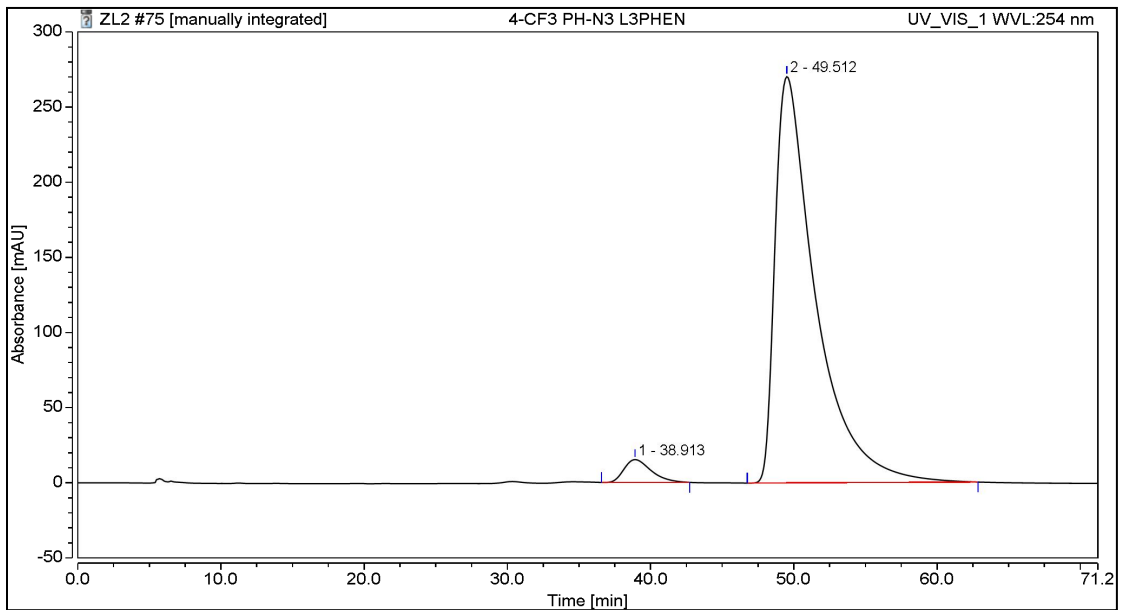

| Integration Results |           |                       |                 |                |                    |                      |
|---------------------|-----------|-----------------------|-----------------|----------------|--------------------|----------------------|
| No.                 | Peak Name | Retention Time<br>min | Area<br>mAU*min | Height<br>mAU  | Relative Area<br>% | Relative Height<br>% |
| 1                   |           | 38.913                | 33.344          | 15.172         | 3.63               | 5.31                 |
| 2                   |           | 49.512                | 886.280         | 270.395        | 96.37              | 94.69                |
| <b>Total:</b>       |           |                       | <b>919.624</b>  | <b>285.567</b> | <b>100.00</b>      | <b>100.00</b>        |

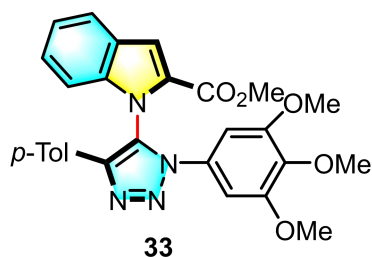

White solid, 44.8 mg, 90% yield, 99.5:0.5 er. [Chiral HPLC analysis of the product: Daicel Chiralcel OD-H 250X4.6 mm 5u column; *n*-hexane/2-propanol = 95/5, flow rate = 0.5 mL/min,  $\lambda$  = 254 nm,  $t$  (major) = 77.36 min,  $t$  (minor) = 66.38 min].  $[\alpha]_D^{26} = -46.9^\circ$  ( $c = 1.1$ ,  $\text{CHCl}_3$ ).  **$^1\text{H NMR}$  (500 MHz,  $\text{CDCl}_3$ )**  $\delta$  7.76 (d,  $J = 8.0$  Hz, 1H), 7.48 (s, 1H), 7.39 - 7.36 (m, 3H), 7.31-7.26 (m, 1H), 7.13 (d,  $J = 8.3$  Hz, 1H), 7.06 (d,  $J = 8.1$  Hz, 2H), 6.37 (s, 2H), 3.77 (s, 3H), 3.67 (s, 3H), 3.45 (s, 6H), 2.27 (s, 3H).  **$^{13}\text{C NMR}$  (126 MHz,  $\text{CDCl}_3$ )**  $\delta$  160.5, 153.5, 142.5, 139.9, 138.6, 130.8, 129.7, 128.6, 128.2, 127.4, 127.1, 126.5, 123.3, 123.0, 114.2, 111.4, 100.7, 61.0, 56.0, 52.1, 21.4. **HRMS (ESI,  $m/z$ )** Calcd for  $\text{C}_{28}\text{H}_{27}\text{N}_4\text{O}_5$  ( $\text{M}+\text{H}$ ) $^+$ : 499.1976; Found: 499.1961.

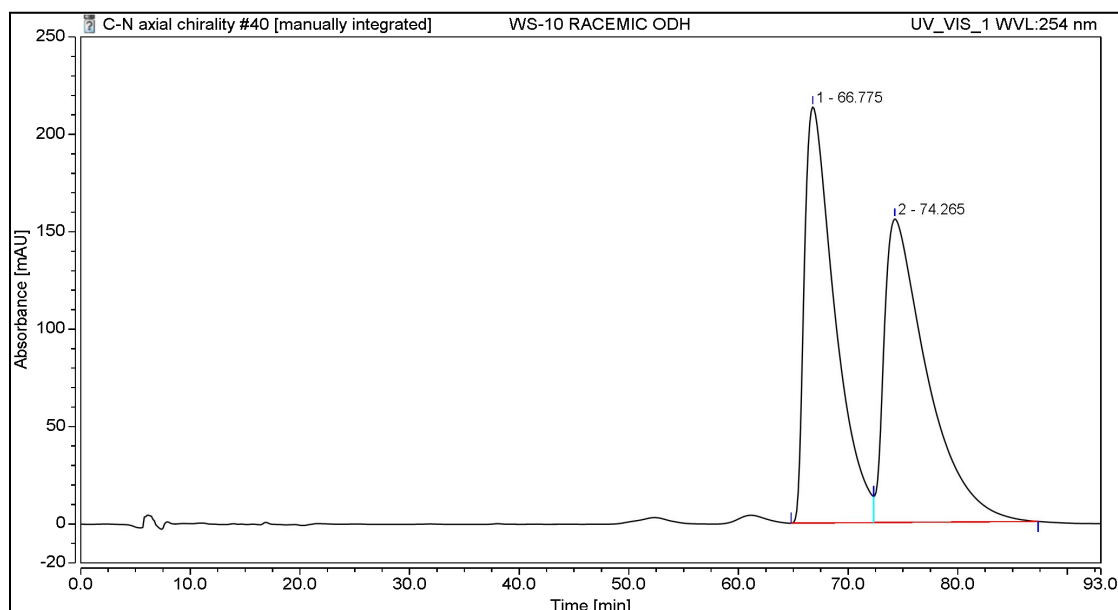

| Integration Results |           |                       |                 |                |                    |                      |
|---------------------|-----------|-----------------------|-----------------|----------------|--------------------|----------------------|
| No.                 | Peak Name | Retention Time<br>min | Area<br>mAU*min | Height<br>mAU  | Relative Area<br>% | Relative Height<br>% |
| 1                   |           | 66.775                | 685.215         | 213.653        | 49.21              | 57.83                |
| 2                   |           | 74.265                | 707.275         | 155.817        | 50.79              | 42.17                |
| <b>Total:</b>       |           |                       | <b>1392.490</b> | <b>369.469</b> | <b>100.00</b>      | <b>100.00</b>        |

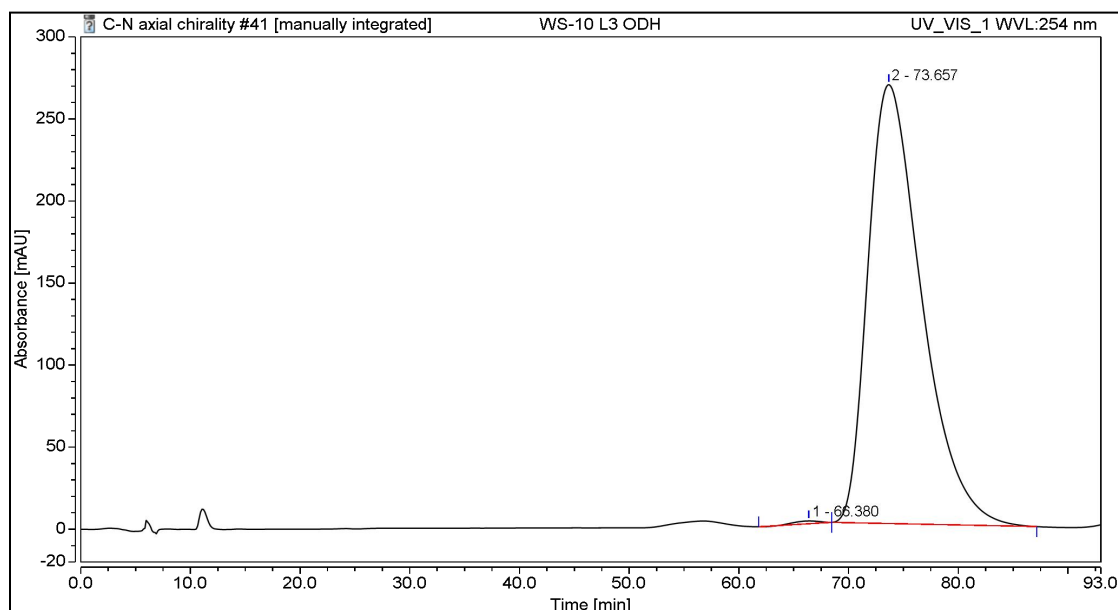

| Integration Results |           |                       |                 |                |                    |                      |
|---------------------|-----------|-----------------------|-----------------|----------------|--------------------|----------------------|
| No.                 | Peak Name | Retention Time<br>min | Area<br>mAU*min | Height<br>mAU  | Relative Area<br>% | Relative Height<br>% |
| 1                   |           | 66.380                | 4.779           | 1.727          | 0.31               | 0.64                 |
| 2                   |           | 73.657                | 1517.630        | 267.505        | 99.69              | 99.36                |
| <b>Total:</b>       |           |                       | <b>1522.409</b> | <b>269.231</b> | <b>100.00</b>      | <b>100.00</b>        |

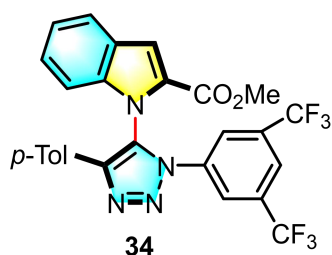

White solid, 49.5 mg, 91% yield, 97:3 er. [Chiral HPLC analysis of the product: Phenomenex 00G-4457-E0 250X4.6 mm 5u column; *n*-hexane/2-propanol = 90/10, flow rate = 0.5 mL/min,  $\lambda$  = 254 nm, *t* (major) = 13.35 min, *t* (minor) = 8.85 min].  $[\alpha]_D^{26} = -88.3^\circ$  (*c* = 0.9, CHCl<sub>3</sub>). **<sup>1</sup>H NMR (500 MHz, CDCl<sub>3</sub>)**  $\delta$  7.81 (d, *J* = 8.2 Hz, 2H), 7.61 (s, 2H), 7.53 (s, 1H), 7.39 (t, *J* = 7.7 Hz, 1H), 7.35-7.32 (m, 3H), 7.07 (d, *J* = 8.2 Hz, 3H), 3.67 (s, 3H), 2.28 (s, 3H). **<sup>13</sup>C NMR (126 MHz, CDCl<sub>3</sub>)**  $\delta$  160.7, 143.0, 139.5, 139.1, 136.7, 133.7, 133.4, 133.1, 132.8, 129.8, 128.5, 128.1, 128.0, 127.2, 125.9, 125.8, 123.7, 123.5, 123.3, 123.3, 122.9, 121.4, 115.0, 111.0, 52.3, 21.4. **<sup>19</sup>F NMR (471 MHz, CDCl<sub>3</sub>)**  $\delta$  -63.37. **HRMS (ESI, *m/z*)** Calcd for C<sub>27</sub>H<sub>19</sub>F<sub>6</sub>N<sub>4</sub>O<sub>2</sub> (M+H)<sup>+</sup>: 545.1407; Found: 545.1395.

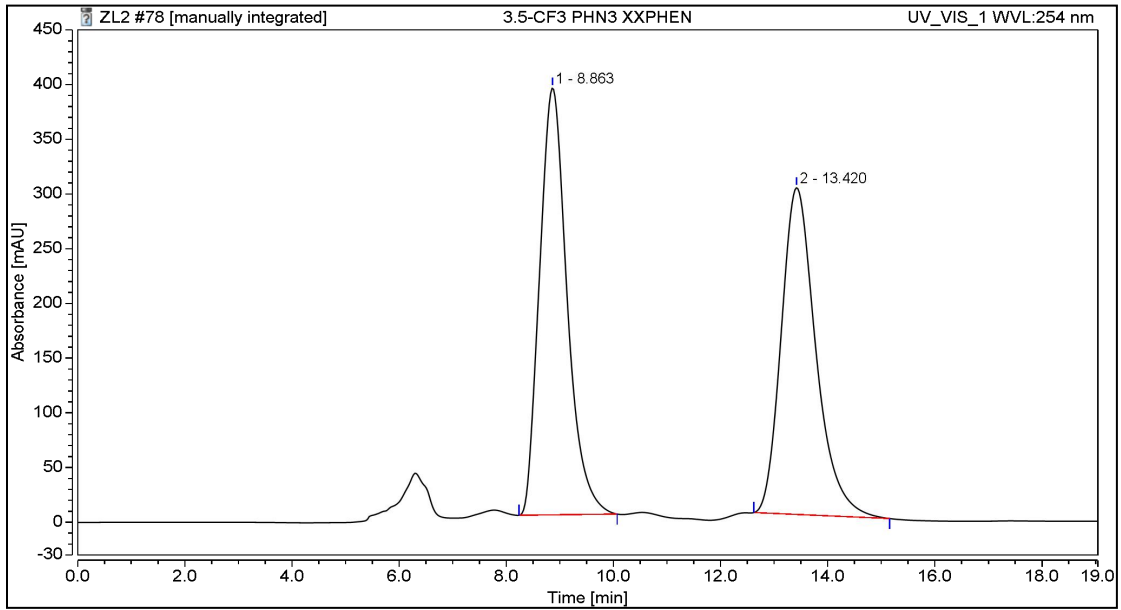

| Integration Results |           |                       |                 |                |                    |                      |
|---------------------|-----------|-----------------------|-----------------|----------------|--------------------|----------------------|
| No.                 | Peak Name | Retention Time<br>min | Area<br>mAU*min | Height<br>mAU  | Relative Area<br>% | Relative Height<br>% |
| 1                   |           | 8.863                 | 231.922         | 390.331        | 50.96              | 56.65                |
| 2                   |           | 13.420                | 223.212         | 298.693        | 49.04              | 43.35                |
| <b>Total:</b>       |           |                       | <b>455.134</b>  | <b>689.024</b> | <b>100.00</b>      | <b>100.00</b>        |

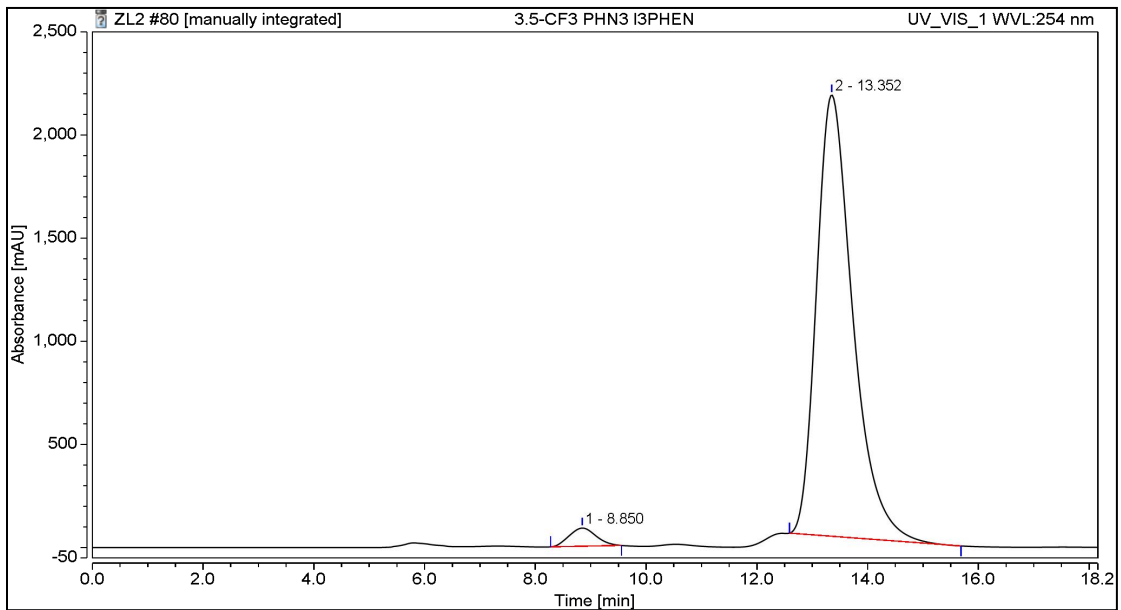

| Integration Results |           |                       |                 |                 |                    |                      |
|---------------------|-----------|-----------------------|-----------------|-----------------|--------------------|----------------------|
| No.                 | Peak Name | Retention Time<br>min | Area<br>mAU*min | Height<br>mAU   | Relative Area<br>% | Relative Height<br>% |
| 1                   |           | 8.850                 | 49.817          | 88.095          | 2.97               | 3.95                 |
| 2                   |           | 13.352                | 1625.013        | 2140.351        | 97.03              | 96.05                |
| <b>Total:</b>       |           |                       | <b>1674.830</b> | <b>2228.447</b> | <b>100.00</b>      | <b>100.00</b>        |

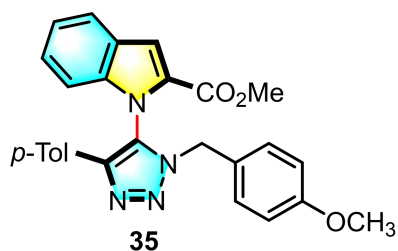

White solid, 43.4 mg, 96% yield, 97.5:2.5 er. [Chiral HPLC analysis of the product: Daicel Chiralpak AS-H 250X4.6 mm 5u column; *n*-hexane/2-propanol = 90/10, flow rate = 1.0 mL/min,  $\lambda$  = 254 nm, *t* (major) = 39.68 min, *t* (minor) = 50.30 min].  $[\alpha]_D^{26} = -196.5^\circ$  (*c* = 1.0, CHCl<sub>3</sub>). **<sup>1</sup>H NMR (500 MHz, CDCl<sub>3</sub>)**  $\delta$  7.74 (d, *J* = 8.0 Hz, 1H), 7.56 (s, 1H), 7.20 (dd, *J* = 15.9, 7.8 Hz, 3H), 7.13 (t, *J* = 7.7 Hz, 1H), 6.96 (d, *J* = 8.1 Hz, 2H), 6.80 (d, *J* = 8.6 Hz, 2H), 6.56 (t, *J* = 7.6 Hz, 3H), 5.20 (d, *J* = 15.0 Hz, 1H), 5.14 (d, *J* = 15.0 Hz, 1H), 3.67 (s, 3H), 3.60 (s, 3H), 2.22 (s, 3H). **<sup>13</sup>C NMR (126 MHz, CDCl<sub>3</sub>)**  $\delta$  160.5, 159.7, 142.5, 139.4, 138.2, 129.7, 129.5, 128.4, 128.1, 126.9, 126.8, 126.7, 125.6, 125.4, 122.9, 122.6, 114.2, 113.9, 111.1, 55.3, 52.0, 52.0, 21.3. **HRMS (ESI, *m/z*)** Calcd for C<sub>27</sub>H<sub>25</sub>N<sub>4</sub>O<sub>3</sub> (M+H)<sup>+</sup>: 453.1921; Found: 453.1914.

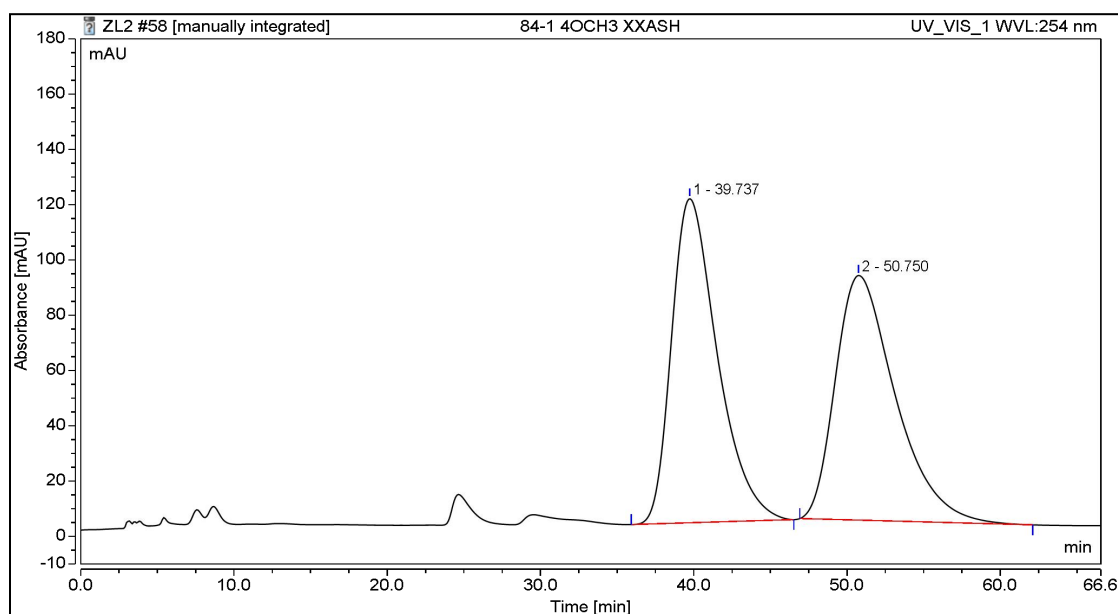

| Integration Results |           |                       |                 |                |                    |                      |
|---------------------|-----------|-----------------------|-----------------|----------------|--------------------|----------------------|
| No.                 | Peak Name | Retention Time<br>min | Area<br>mAU*min | Height<br>mAU  | Relative Area<br>% | Relative Height<br>% |
| 1                   |           | 39.737                | 406.063         | 117.266        | 50.29              | 56.98                |
| 2                   |           | 50.750                | 401.307         | 88.536         | 49.71              | 43.02                |
| <b>Total:</b>       |           |                       | <b>807.369</b>  | <b>205.802</b> | <b>100.00</b>      | <b>100.00</b>        |

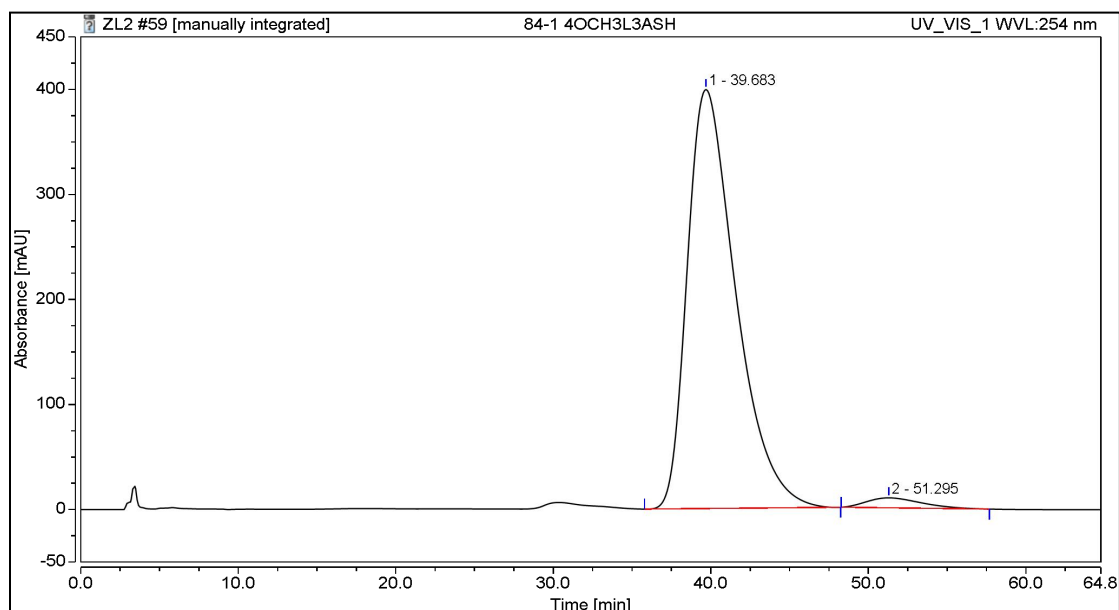

| Integration Results |           |                       |                 |                |                    |                      |
|---------------------|-----------|-----------------------|-----------------|----------------|--------------------|----------------------|
| No.                 | Peak Name | Retention Time<br>min | Area<br>mAU*min | Height<br>mAU  | Relative Area<br>% | Relative Height<br>% |
| 1                   |           | 39.683                | 1423.872        | 398.988        | 97.38              | 97.67                |
| 2                   |           | 51.295                | 38.292          | 9.517          | 2.62               | 2.33                 |
| <b>Total:</b>       |           |                       | <b>1462.164</b> | <b>408.505</b> | <b>100.00</b>      | <b>100.00</b>        |

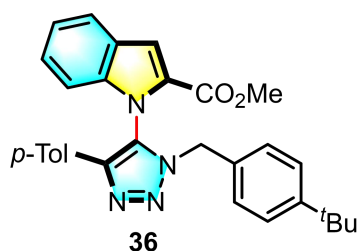

White solid, 43.5 mg, 91% yield, 99.5:0.5 er. [Chiral HPLC analysis of the product: Daicel Chiralcel OD-H 250X4.6 mm 5u column; *n*-hexane/2-propanol = 90/10, flow rate = 1.0 mL/min,  $\lambda$  = 254 nm,  $t$  (major) = 10.36 min,  $t$  (minor) = 13.31 min].  $[\alpha]_D^{26} = -205.8^\circ$  ( $c = 0.9$ ,  $\text{CHCl}_3$ ).  $^1\text{H NMR}$  (500 MHz,  $\text{CDCl}_3$ )  $\delta$  7.71 (d,  $J = 8.0$  Hz, 1H), 7.55 (s, 1H), 7.17 (t,  $J = 7.6$  Hz, 3H), 7.09-7.01 (m, 3H), 6.97 (d,  $J = 8.1$  Hz, 2H), 6.80 (d,  $J = 8.3$  Hz, 2H), 6.52 (d,  $J = 8.4$  Hz, 1H), 5.29 (d,  $J = 14.5$  Hz, 1H), 5.15 (d,  $J = 14.5$  Hz, 1H), 3.61 (s, 3H), 2.22 (s, 3H), 1.19 (s, 9H).  $^{13}\text{C NMR}$  (126 MHz,  $\text{CDCl}_3$ )  $\delta$  160.6, 151.5, 142.5, 139.4, 138.2, 130.5, 129.5, 128.3, 128.3, 128.0, 126.9, 126.8, 126.8, 125.4, 125.4, 122.8, 122.8, 114.3, 111.1, 52.3, 52.0, 34.6, 31.3, 21.3. **HRMS (ESI,  $m/z$ )** Calcd for  $\text{C}_{30}\text{H}_{31}\text{N}_4\text{O}_2$  ( $\text{M}+\text{H}$ ) $^+$ : 479.2442; Found: 479.2435.

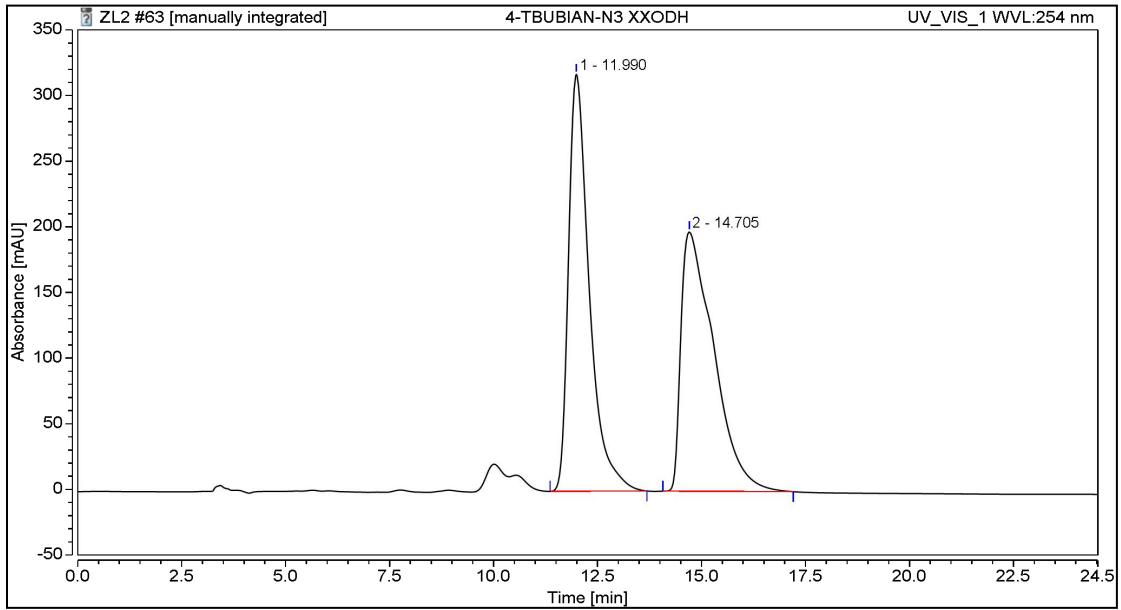

| Integration Results |           |                       |                 |                |                    |                      |
|---------------------|-----------|-----------------------|-----------------|----------------|--------------------|----------------------|
| No.                 | Peak Name | Retention Time<br>min | Area<br>mAU*min | Height<br>mAU  | Relative Area<br>% | Relative Height<br>% |
| 1                   |           | 11.990                | 183.730         | 317.604        | 50.44              | 61.65                |
| 2                   |           | 14.705                | 180.517         | 197.561        | 49.56              | 38.35                |
| <b>Total:</b>       |           |                       | <b>364.247</b>  | <b>515.165</b> | <b>100.00</b>      | <b>100.00</b>        |

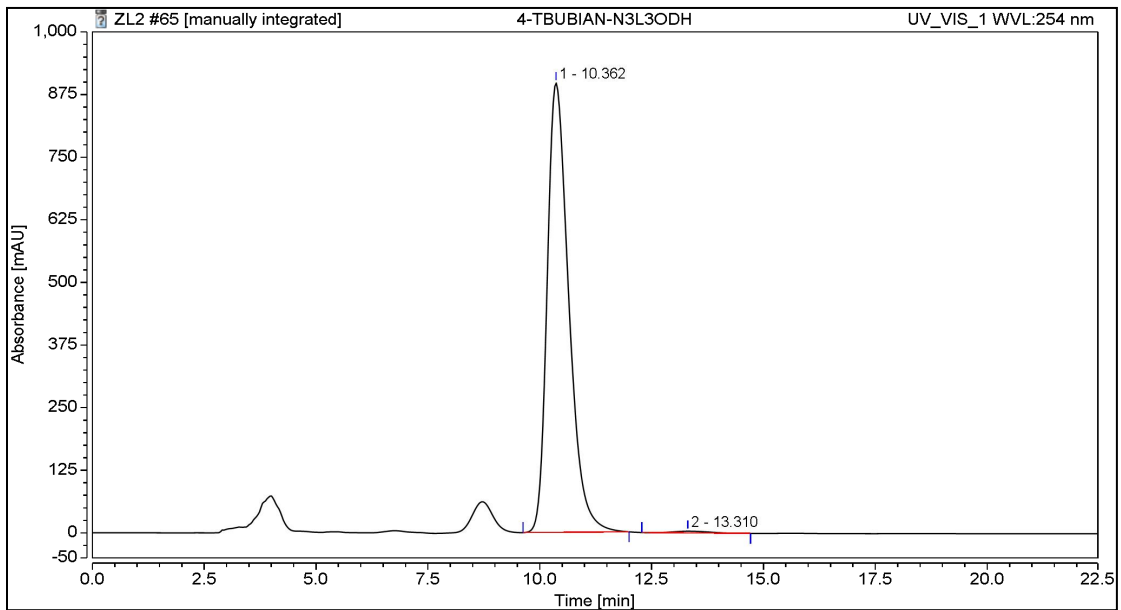

| Integration Results |           |                       |                 |                |                    |                      |
|---------------------|-----------|-----------------------|-----------------|----------------|--------------------|----------------------|
| No.                 | Peak Name | Retention Time<br>min | Area<br>mAU*min | Height<br>mAU  | Relative Area<br>% | Relative Height<br>% |
| 1                   |           | 10.362                | 501.652         | 897.439        | 99.41              | 99.63                |
| 2                   |           | 13.310                | 2.969           | 3.360          | 0.59               | 0.37                 |
| <b>Total:</b>       |           |                       | <b>504.621</b>  | <b>900.799</b> | <b>100.00</b>      | <b>100.00</b>        |



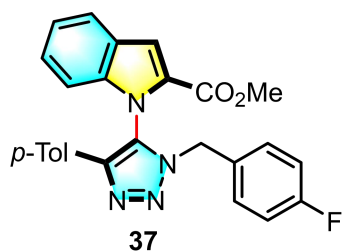

White solid, 41.8 mg, 95% yield, 99:1 er. [Chiral HPLC analysis of the product: Daicel Chiralcel OD-H 250X4.6 mm 5u column; *n*-hexane/2-propanol = 80/20, flow rate = 1.0 mL/min,  $\lambda$  = 254 nm, t (major) = 9.06 min, t (minor) = 11.60 min].  $[\alpha]_D^{26} = -143.0^\circ$  (c = 1.0, CHCl<sub>3</sub>). **<sup>1</sup>H NMR (500 MHz, CDCl<sub>3</sub>)**  $\delta$  7.74 (d, *J* = 8.0 Hz, 1H), 7.56 (s, 1H), 7.22 (t, *J* = 7.5 Hz, 1H), 7.19-7.13 (m, 3H), 6.97 (d, *J* = 8.1 Hz, 2H), 6.87 (dd, *J* = 8.6, 5.3 Hz, 2H), 6.74 (t, *J* = 8.6 Hz, 2H), 6.56 (d, *J* = 8.3 Hz, 1H), 5.23 (d, *J* = 14.9 Hz, 1H), 5.17 (d, *J* = 14.9 Hz, 1H), 3.63 (s, 3H), 2.22 (s, 3H). **<sup>13</sup>C NMR (126 MHz, CDCl<sub>3</sub>)**  $\delta$  163.8, 161.8, 160.6, 142.6, 139.4, 138.3, 130.3, 130.2, 129.5, 129.4, 128.3, 128.2, 127.1, 126.8, 126.6, 125.4, 123.0, 122.8, 115.6, 115.4, 114.3, 111.0, 52.0, 51.7, 21.3. **<sup>19</sup>F NMR (471 MHz, CDCl<sub>3</sub>)**  $\delta$  -113.38. **HRMS (ESI, m/z)** Calcd for C<sub>26</sub>H<sub>22</sub>FN<sub>4</sub>O<sub>2</sub> (M+H)<sup>+</sup>: 441.1721; Found: 441.1708.

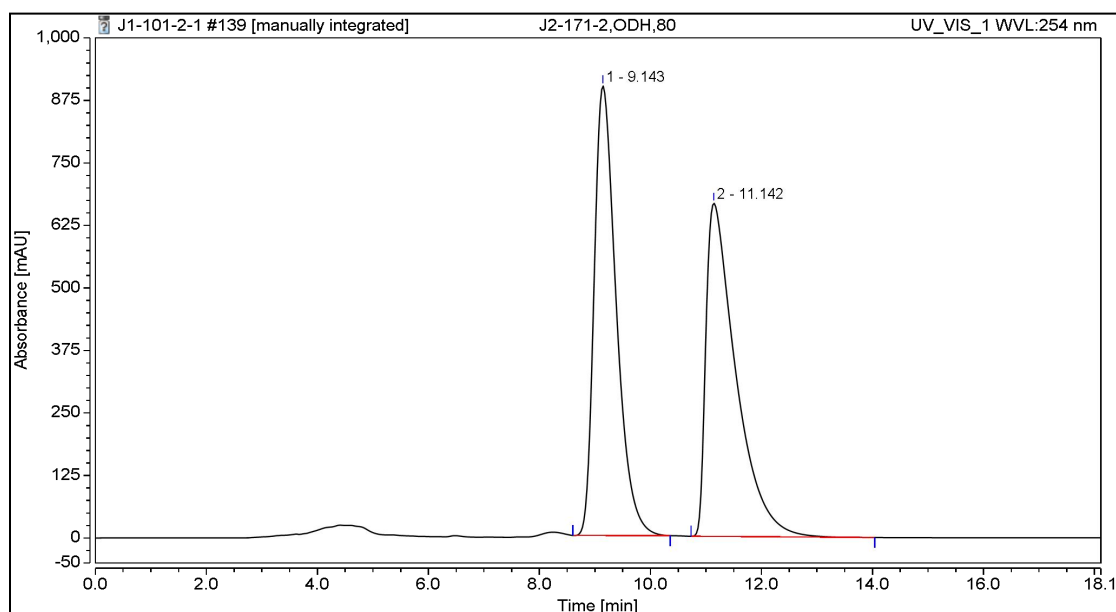

| Integration Results |           |                       |                 |                 |                    |                      |
|---------------------|-----------|-----------------------|-----------------|-----------------|--------------------|----------------------|
| No.                 | Peak Name | Retention Time<br>min | Area<br>mAU*min | Height<br>mAU   | Relative Area<br>% | Relative Height<br>% |
| 1                   |           | 9.143                 | 413.720         | 899.222         | 49.90              | 57.44                |
| 2                   |           | 11.142                | 415.340         | 666.376         | 50.10              | 42.56                |
| <b>Total:</b>       |           |                       | <b>829.060</b>  | <b>1565.598</b> | <b>100.00</b>      | <b>100.00</b>        |

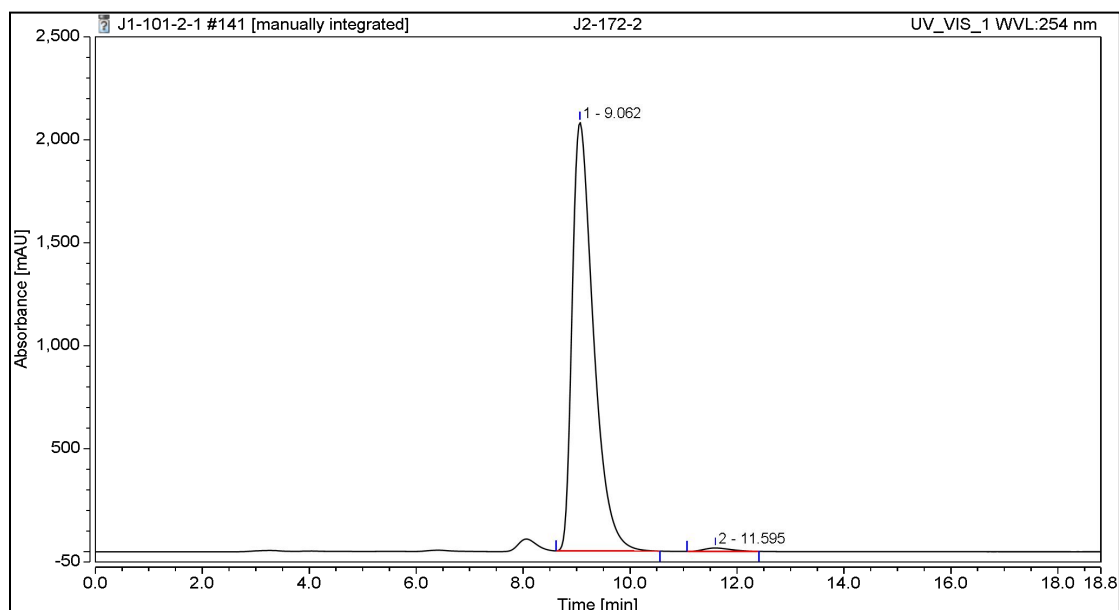

| Integration Results |           |                       |                 |                 |                    |                      |
|---------------------|-----------|-----------------------|-----------------|-----------------|--------------------|----------------------|
| No.                 | Peak Name | Retention Time<br>min | Area<br>mAU*min | Height<br>mAU   | Relative Area<br>% | Relative Height<br>% |
| 1                   |           | 9.062                 | 959.903         | 2082.009        | 98.99              | 99.21                |
| 2                   |           | 11.595                | 9.761           | 16.674          | 1.01               | 0.79                 |
| <b>Total:</b>       |           |                       | <b>969.664</b>  | <b>2098.683</b> | <b>100.00</b>      | <b>100.00</b>        |

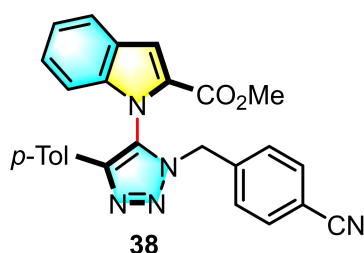

White solid, 41.8 mg, 83% yield, 99:1 er. [Chiral HPLC analysis of the product: Daicel Chiralcel OD-H 250X4.6 mm 5u column; *n*-hexane/2-propanol = 70/30, flow rate = 1.0 mL/min,  $\lambda$  = 254 nm, *t* (major) = 20.36 min, *t* (minor) = 13.19 min].  $[\alpha]_D^{26} = -155.5^\circ$  (*c* = 1.0, CHCl<sub>3</sub>). **<sup>1</sup>H NMR (500 MHz, CDCl<sub>3</sub>)**  $\delta$  7.73 (d, *J* = 8.0 Hz, 1H), 7.54 (s, 1H), 7.34 (d, *J* = 8.3 Hz, 2H), 7.23 (t, *J* = 7.2 Hz, 1H), 7.18-7.12 (m, 3H), 7.00 (dd, *J* = 21.4, 8.2 Hz, 4H), 6.52 (d, *J* = 8.4 Hz, 1H), 5.35 (d, *J* = 15.0 Hz, 1H), 5.21 (d, *J* = 15.0 Hz, 1H), 3.67 (s, 3H), 2.23 (s, 3H). **<sup>13</sup>C NMR (126 MHz, CDCl<sub>3</sub>)**  $\delta$  160.6, 142.7, 139.2, 138.6, 138.5, 132.3, 129.6, 129.0, 128.3, 128.2, 127.2, 126.9, 126.3, 125.5, 123.1, 123.0, 118.1, 114.4, 112.5, 110.8, 52.1, 51.7, 21.3. **HRMS (ESI, *m/z*)** Calcd for C<sub>27</sub>H<sub>22</sub>N<sub>5</sub>O<sub>2</sub> (M+H)<sup>+</sup>: 448.1768; Found: 448.1762.

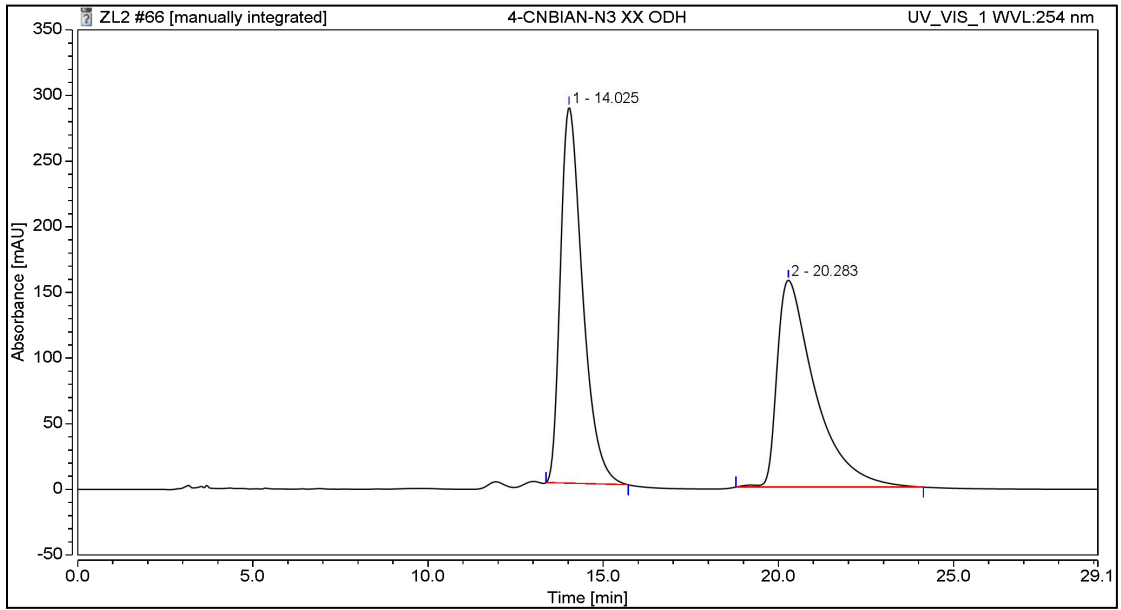

| Integration Results |           |                       |                 |                |                    |                      |
|---------------------|-----------|-----------------------|-----------------|----------------|--------------------|----------------------|
| No.                 | Peak Name | Retention Time<br>min | Area<br>mAU*min | Height<br>mAU  | Relative Area<br>% | Relative Height<br>% |
| 1                   |           | 14.025                | 210.390         | 286.429        | 51.62              | 64.50                |
| 2                   |           | 20.283                | 197.173         | 157.622        | 48.38              | 35.50                |
| <b>Total:</b>       |           |                       | <b>407.563</b>  | <b>444.051</b> | <b>100.00</b>      | <b>100.00</b>        |

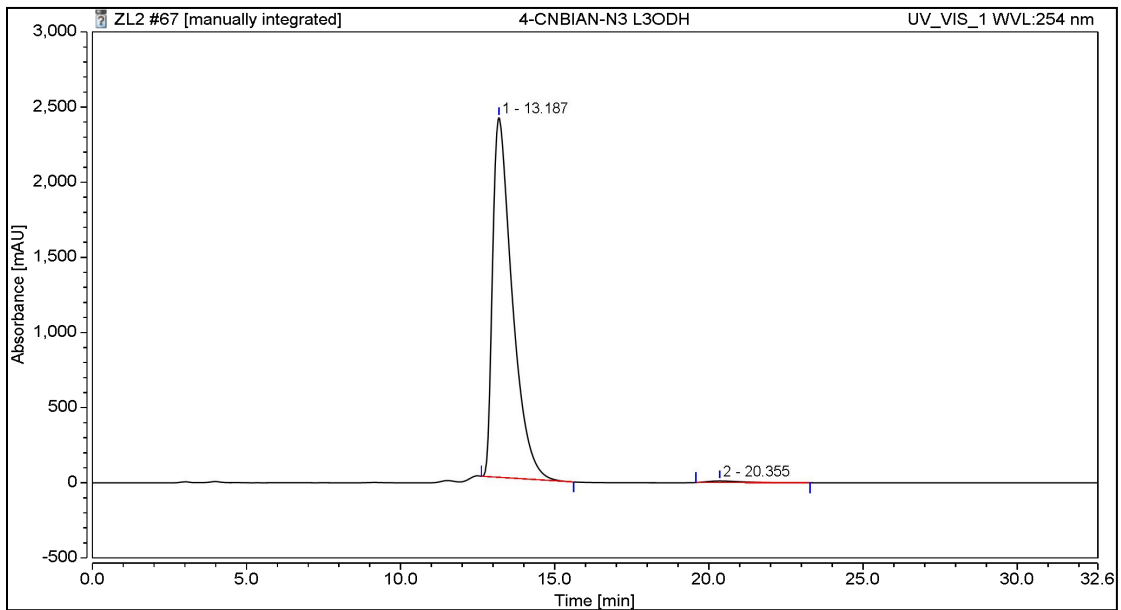

| Integration Results |           |                       |                 |                 |                    |                      |
|---------------------|-----------|-----------------------|-----------------|-----------------|--------------------|----------------------|
| No.                 | Peak Name | Retention Time<br>min | Area<br>mAU*min | Height<br>mAU   | Relative Area<br>% | Relative Height<br>% |
| 1                   |           | 13.187                | 1766.737        | 2393.232        | 99.22              | 99.56                |
| 2                   |           | 20.355                | 13.822          | 10.461          | 0.78               | 0.44                 |
| <b>Total:</b>       |           |                       | <b>1780.559</b> | <b>2403.694</b> | <b>100.00</b>      | <b>100.00</b>        |

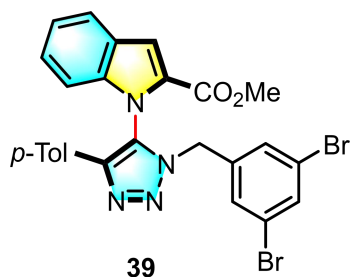

White solid, 53.4 mg, 92% yield, 97.5:2.5 er. [Chiral HPLC analysis of the product: Daicel Chiralcel OD-H 250X4.6 mm 5u column; *n*-hexane/2-propanol = 90/10, flow rate = 1.0 mL/min,  $\lambda$  = 254 nm, *t* (major) = 15.81 min, *t* (minor) = 22.46 min].  $[\alpha]_D^{25} = -83.5^\circ$  (*c* = 1.1, CHCl<sub>3</sub>). **<sup>1</sup>H NMR (500 MHz, CDCl<sub>3</sub>)**  $\delta$  7.76 (d, *J* = 7.2 Hz, 1H), 7.58 (s, 1H), 7.33 (s, 1H), 7.24-7.18 (m, 4H), 6.99 (d, *J* = 8.1 Hz, 2H), 6.92 (d, *J* = 1.4 Hz, 2H), 6.58 (d, *J* = 8.1 Hz, 1H), 5.25 (d, *J* = 15.0 Hz, 1H), 5.09 (d, *J* = 15.0 Hz, 1H), 3.70 (s, 3H), 2.23 (s, 3H). **<sup>13</sup>C NMR (126 MHz, CDCl<sub>3</sub>)**  $\delta$  160.6, 142.7, 139.1, 138.5, 136.8, 134.1, 130.2, 129.6, 128.3, 128.1, 127.2, 126.8, 126.4, 125.5, 123.2, 123.1, 123.0, 114.5, 110.6, 52.2, 51.3, 21.3. **HRMS (ESI, *m/z*)** Calcd for C<sub>26</sub>H<sub>21</sub>Br<sub>2</sub>N<sub>4</sub>O<sub>2</sub> (M+H)<sup>+</sup>: 579.0026, 581.0005; Found: 579.0040, 581.0004.

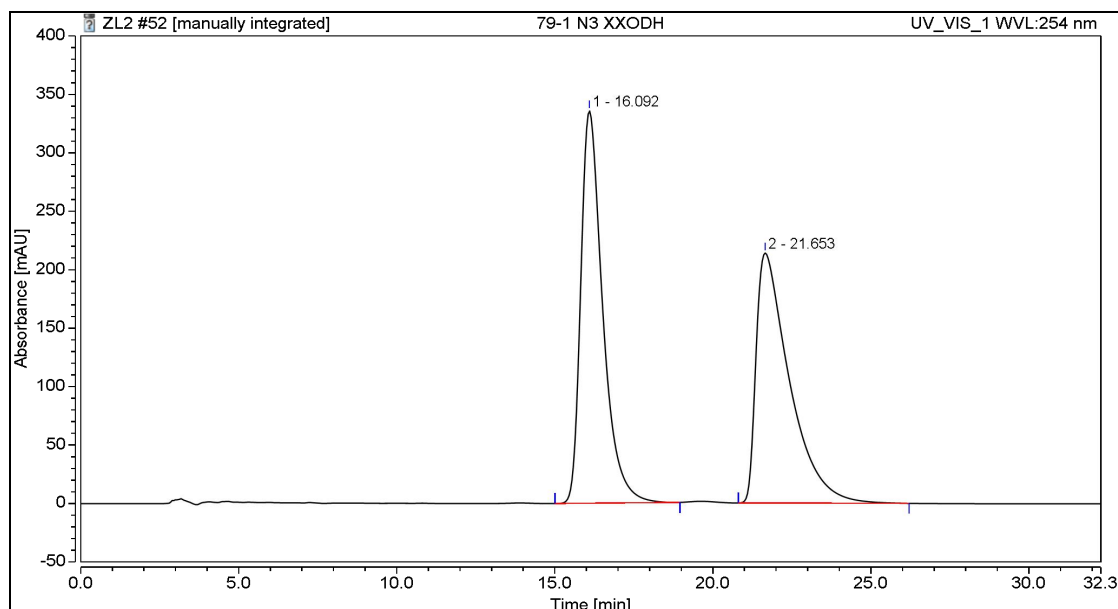

| Integration Results |           |                       |                 |                |                    |                      |
|---------------------|-----------|-----------------------|-----------------|----------------|--------------------|----------------------|
| No.                 | Peak Name | Retention Time<br>min | Area<br>mAU*min | Height<br>mAU  | Relative Area<br>% | Relative Height<br>% |
| 1                   |           | 16.092                | 269.912         | 335.744        | 50.83              | 61.08                |
| 2                   |           | 21.653                | 261.144         | 213.906        | 49.17              | 38.92                |
| <b>Total:</b>       |           |                       | <b>531.056</b>  | <b>549.651</b> | <b>100.00</b>      | <b>100.00</b>        |

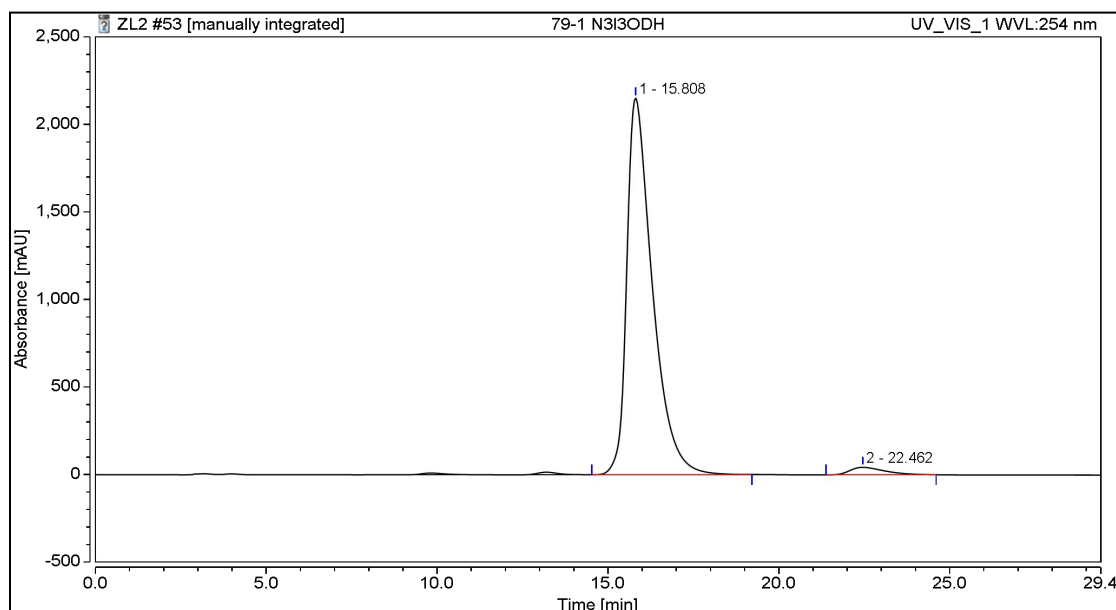

| Integration Results |           |                       |                 |                 |                    |                      |
|---------------------|-----------|-----------------------|-----------------|-----------------|--------------------|----------------------|
| No.                 | Peak Name | Retention Time<br>min | Area<br>mAU*min | Height<br>mAU   | Relative Area<br>% | Relative Height<br>% |
| 1                   |           | 15.808                | 1878.216        | 2154.039        | 97.36              | 98.04                |
| 2                   |           | 22.462                | 50.939          | 43.067          | 2.64               | 1.96                 |
| <b>Total:</b>       |           |                       | <b>1929.155</b> | <b>2197.106</b> | <b>100.00</b>      | <b>100.00</b>        |

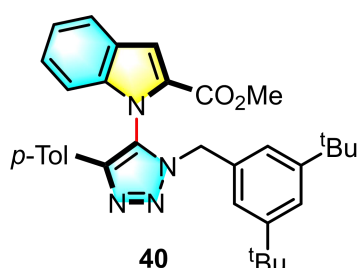

White solid, 48.5 mg, 91% yield, 98.5:1.5 er. [Chiral HPLC analysis of the product: Daicel Chiralcel OD-H 250X4.6 mm 5u column; *n*-hexane/2-propanol = 90/10, flow rate = 0.5 mL/min,  $\lambda$  = 254 nm,  $t$  (major) = 10.00 min,  $t$  (minor) = 16.30 min].  $[\alpha]_D^{26} = -217.8^\circ$  ( $c = 0.9$ ,  $\text{CHCl}_3$ ).  $^1\text{H NMR}$  (500 MHz,  $\text{CDCl}_3$ )  $\delta$  7.69 (d,  $J = 8.0$  Hz, 1H), 7.55 (s, 1H), 7.18-7.09 (m, 4H), 7.05 (t,  $J = 8.1$  Hz, 1H), 6.95 (d,  $J = 8.1$  Hz, 2H), 6.76 (d,  $J = 1.6$  Hz, 2H), 6.47 (d,  $J = 8.3$  Hz, 1H), 5.36 (d,  $J = 14.7$  Hz, 1H), 5.18 (d,  $J = 14.7$  Hz, 1H), 3.60 (s, 3H), 2.21 (s, 3H), 1.13 (s, 18H).  $^{13}\text{C NMR}$  (126 MHz,  $\text{CDCl}_3$ )  $\delta$  160.6, 151.3, 142.3, 139.4, 138.1, 132.8, 129.5, 128.4, 128.3, 126.9, 126.8, 126.7, 125.3, 122.9, 122.7, 122.6, 122.4, 114.3, 111.1, 53.2, 52.0, 34.7, 31.3, 21.3. **HRMS (ESI,  $m/z$ )** Calcd for  $\text{C}_{34}\text{H}_{39}\text{N}_4\text{O}_2$  ( $\text{M}+\text{H}$ ) $^+$ : 535.3068; Found: 535.3061.

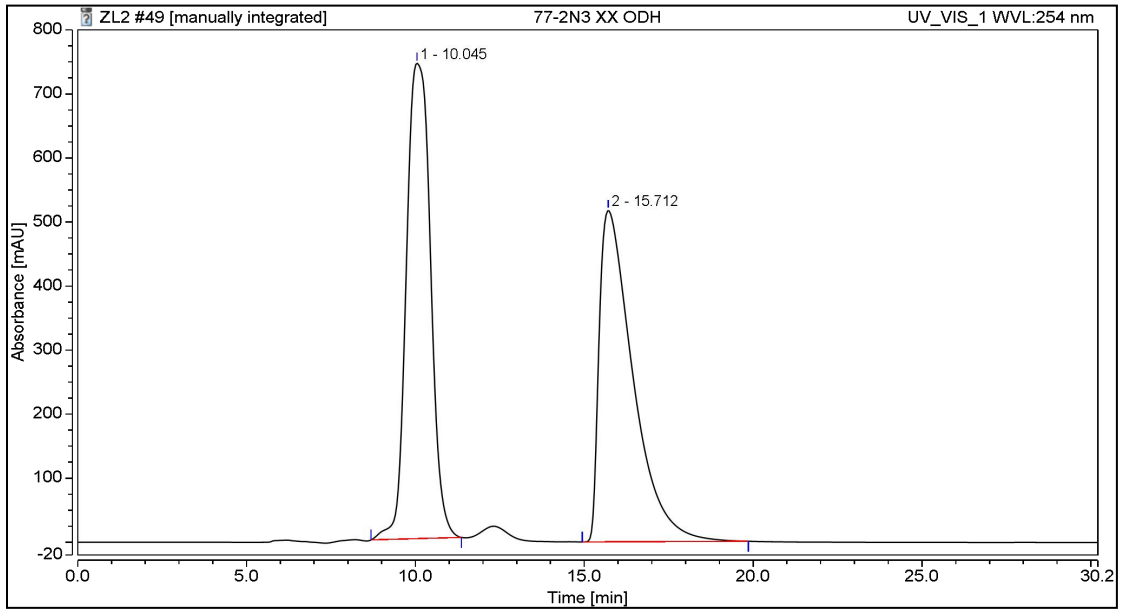

| Integration Results |           |                    |                 |                 |                 |                   |
|---------------------|-----------|--------------------|-----------------|-----------------|-----------------|-------------------|
| No.                 | Peak Name | Retention Time min | Area mAU*min    | Height mAU      | Relative Area % | Relative Height % |
| 1                   |           | 10.045             | 617.997         | 742.478         | 50.79           | 58.92             |
| 2                   |           | 15.712             | 598.722         | 517.649         | 49.21           | 41.08             |
| <b>Total:</b>       |           |                    | <b>1216.720</b> | <b>1260.126</b> | <b>100.00</b>   | <b>100.00</b>     |

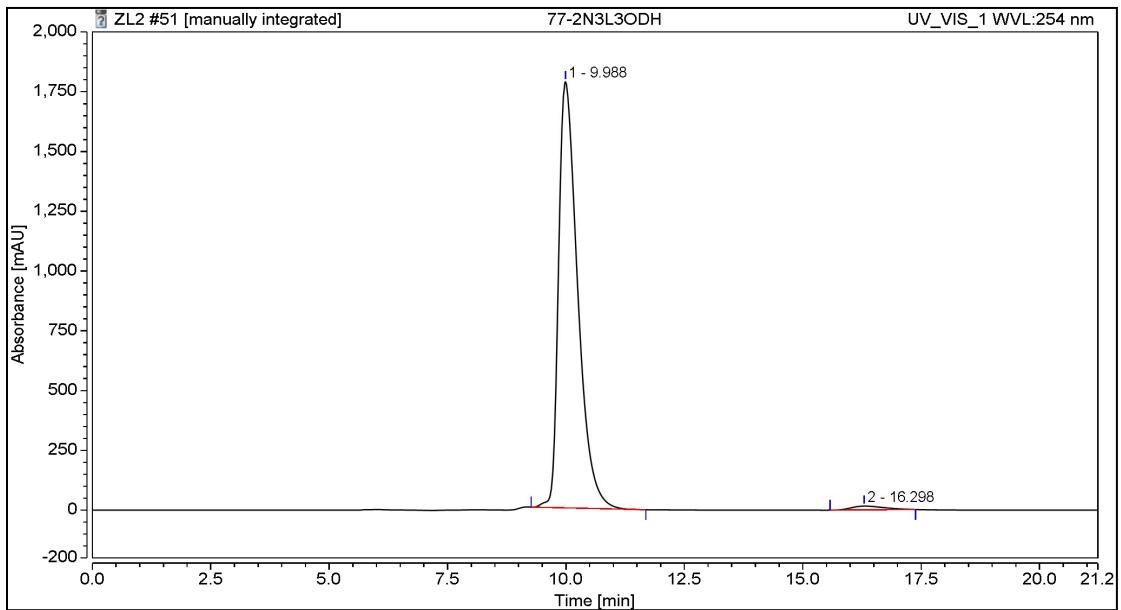

| Integration Results |           |                    |                |                 |                 |                   |
|---------------------|-----------|--------------------|----------------|-----------------|-----------------|-------------------|
| No.                 | Peak Name | Retention Time min | Area mAU*min   | Height mAU      | Relative Area % | Relative Height % |
| 1                   |           | 9.988              | 833.985        | 1782.681        | 98.46           | 99.11             |
| 2                   |           | 16.298             | 13.020         | 16.033          | 1.54            | 0.89              |
| <b>Total:</b>       |           |                    | <b>847.004</b> | <b>1798.713</b> | <b>100.00</b>   | <b>100.00</b>     |

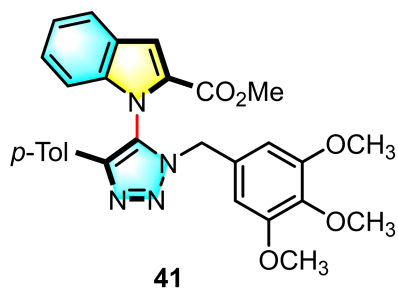

White solid, 40.1 mg, 88% yield, 98.5:1.5 er. [Chiral HPLC analysis of the product: Daicel Chiralcel OD-H 250X4.6 mm 5u column; *n*-hexane/2-propanol = 70/30, flow rate = 1.0 mL/min,  $\lambda$  = 254 nm, *t* (major) = 9.68 min, *t* (minor) = 14.50 min].  $[\alpha]_D^{26} = -102.3^\circ$  (*c* = 1.1, CHCl<sub>3</sub>). **<sup>1</sup>H NMR (500 MHz, CDCl<sub>3</sub>)**  $\delta$  7.73 (d, *J* = 7.9 Hz, 1H), 7.53 (s, 1H), 7.23-7.13 (m, 4H), 6.97 (d, *J* = 8.1 Hz, 2H), 6.57 (d, *J* = 8.2 Hz, 1H), 6.05 (s, 2H), 5.22 (d, *J* = 14.7 Hz, 1H), 5.13 (d, *J* = 14.7 Hz, 1H), 3.70 (s, 3H), 3.66 (s, 3H), 3.58 (s, 6H), 2.22 (s, 3H). **<sup>13</sup>C NMR (126 MHz, CDCl<sub>3</sub>)**  $\delta$  160.5, 153.2, 142.7, 139.4, 138.3, 138.1, 129.5, 128.8, 128.4, 128.1, 127.0, 126.7, 126.6, 125.4, 122.9, 122.8, 114.0, 111.1, 105.5, 60.8, 55.9, 53.0, 52.1, 21.3. **HRMS (ESI, *m/z*)** Calcd for C<sub>29</sub>H<sub>29</sub>N<sub>4</sub>O<sub>5</sub> (M+H)<sup>+</sup>: 513.2132; Found: 513.2125.

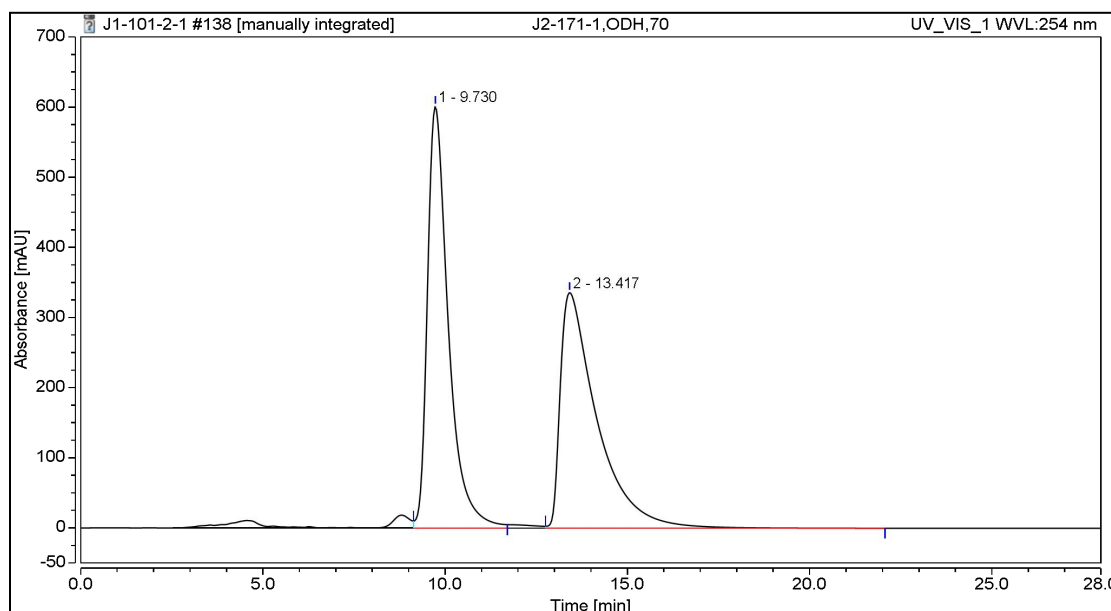

| Integration Results |           |                       |                 |                |                    |                      |
|---------------------|-----------|-----------------------|-----------------|----------------|--------------------|----------------------|
| No.                 | Peak Name | Retention Time<br>min | Area<br>mAU*min | Height<br>mAU  | Relative Area<br>% | Relative Height<br>% |
| 1                   |           | 9.730                 | 400.704         | 601.229        | 50.69              | 64.16                |
| 2                   |           | 13.417                | 389.835         | 335.863        | 49.31              | 35.84                |
| <b>Total:</b>       |           |                       | <b>790.540</b>  | <b>937.093</b> | <b>100.00</b>      | <b>100.00</b>        |

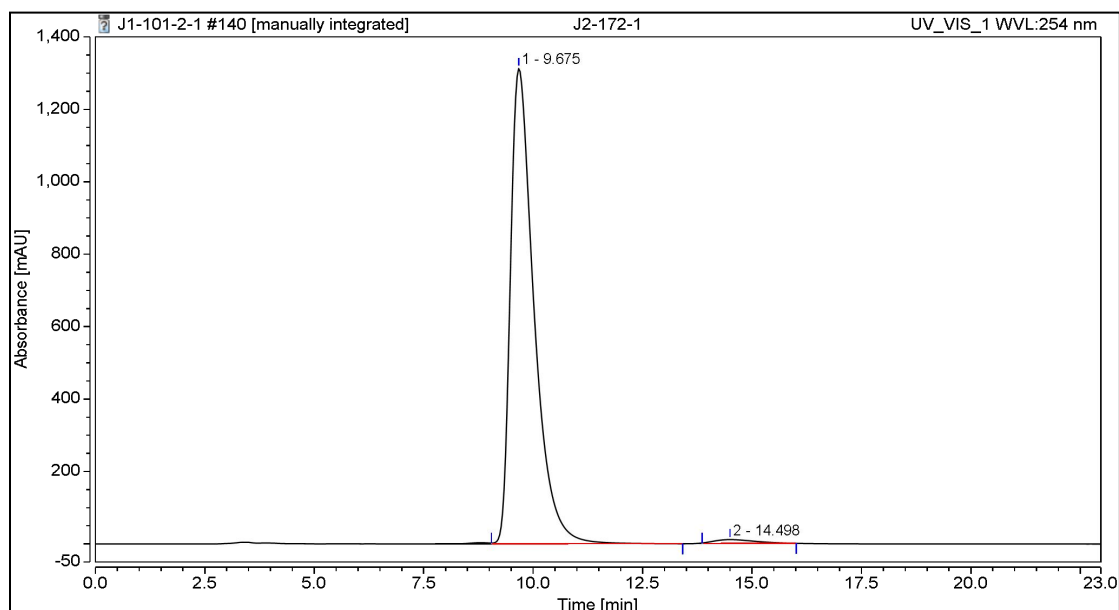

| Integration Results |           |                       |                 |                 |                    |                      |
|---------------------|-----------|-----------------------|-----------------|-----------------|--------------------|----------------------|
| No.                 | Peak Name | Retention Time<br>min | Area<br>mAU*min | Height<br>mAU   | Relative Area<br>% | Relative Height<br>% |
| 1                   |           | 9.675                 | 818.613         | 1313.054        | 98.60              | 99.20                |
| 2                   |           | 14.498                | 11.593          | 10.604          | 1.40               | 0.80                 |
| <b>Total:</b>       |           |                       | <b>830.205</b>  | <b>1323.658</b> | <b>100.00</b>      | <b>100.00</b>        |

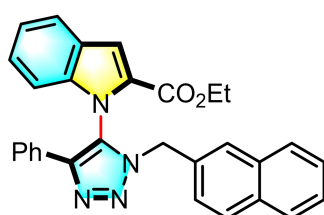

42

White solid, 43.5 mg, 92% yield, 90:10 er. [Chiral HPLC analysis of the product: Daicel Chiralpak AS-H 250X4.6 mm 5u column; *n*-hexane/2-propanol = 90/10, flow rate = 1.0 mL/min,  $\lambda$  = 254 nm, *t* (major) = 24.92 min, *t* (minor) = 38.24 min].  $[\alpha]_D^{26} = -20.0^\circ$  (*c* = 1.4, CHCl<sub>3</sub>). **<sup>1</sup>H NMR (500 MHz, CDCl<sub>3</sub>)**  $\delta$  7.70 (d, *J* = 8.1 Hz, 2H), 7.61 (d, *J* = 8.4 Hz, 1H), 7.55 (s, 1H), 7.50 (dd, *J* = 7.3, 2.3 Hz, 1H), 7.44-7.38 (m, 2H), 7.36-7.31 (m, 2H), 7.21-7.14 (m, 4H), 7.13 (s, 1H), 7.09 (t, *J* = 7.6 Hz, 1H), 6.97 (t, *J* = 7.8 Hz, 1H), 6.56 (d, *J* = 8.4 Hz, 1H), 5.40 (d, *J* = 14.5 Hz, 1H), 5.34 (d, *J* = 14.5 Hz, 1H), 3.78 (q, *J* = 7.1 Hz, 2H), 0.96 (t, *J* = 7.2 Hz, 3H). **<sup>13</sup>C NMR (126 MHz, CDCl<sub>3</sub>)**  $\delta$  158.8, 141.4, 138.1, 132.0, 131.8, 129.5, 128.4, 127.8, 127.8, 127.7, 127.5, 127.2, 126.8, 126.7, 126.4, 125.7, 125.7, 125.4, 125.2, 124.6, 124.4, 121.7, 121.5, 113.2, 109.7, 59.8, 51.6, 12.7. **HRMS (ESI, *m/z*)** Calcd for C<sub>30</sub>H<sub>25</sub>N<sub>4</sub>O<sub>2</sub> (M+H)<sup>+</sup>: 473.1972; Found: 473.1953.



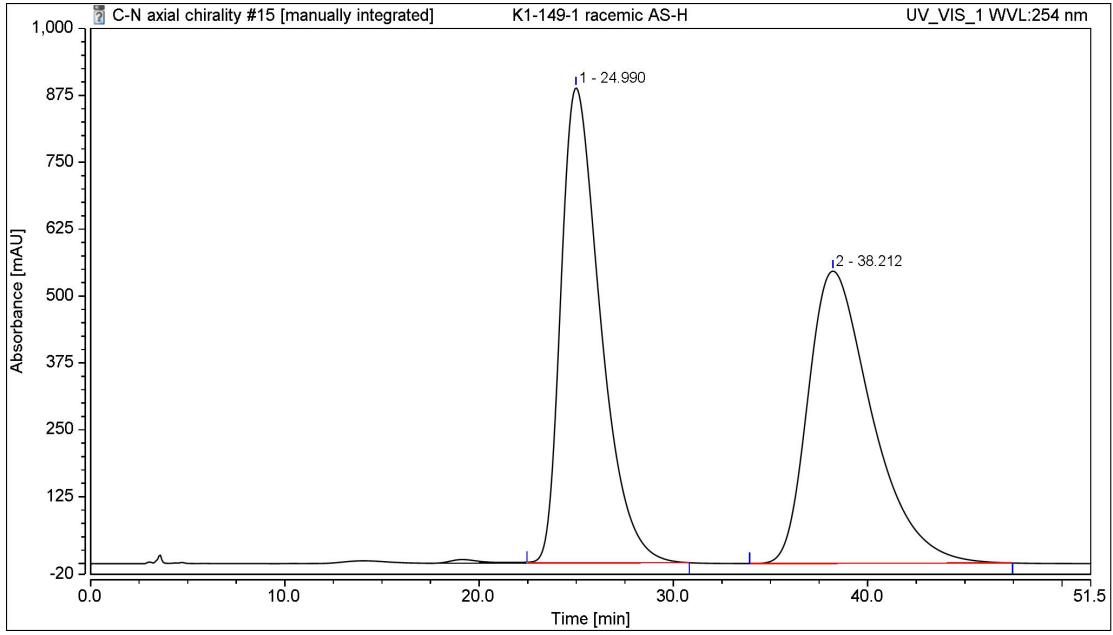

| Integration Results |           |                    |                 |                 |                 |                   |
|---------------------|-----------|--------------------|-----------------|-----------------|-----------------|-------------------|
| No.                 | Peak Name | Retention Time min | Area mAU*min    | Height mAU      | Relative Area % | Relative Height % |
| 1                   |           | 24.990             | 2092.208        | 887.713         | 50.19           | 61.91             |
| 2                   |           | 38.212             | 2076.071        | 546.119         | 49.81           | 38.09             |
| <b>Total:</b>       |           |                    | <b>4168.279</b> | <b>1433.832</b> | <b>100.00</b>   | <b>100.00</b>     |

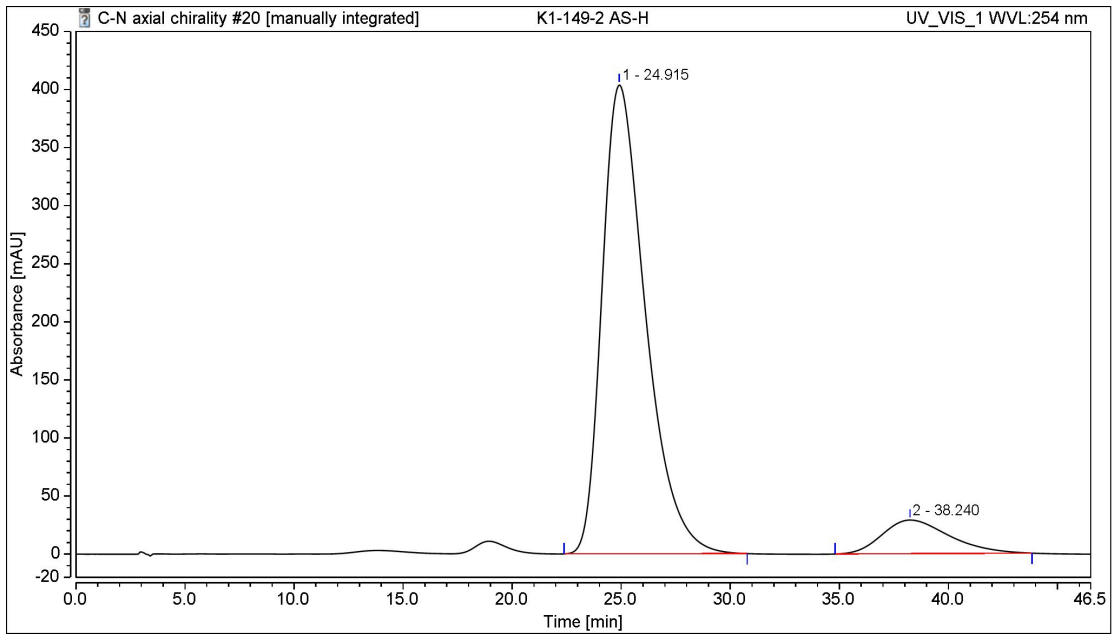

| Integration Results |           |                    |                 |                |                 |                   |
|---------------------|-----------|--------------------|-----------------|----------------|-----------------|-------------------|
| No.                 | Peak Name | Retention Time min | Area mAU*min    | Height mAU     | Relative Area % | Relative Height % |
| 1                   |           | 24.915             | 930.720         | 403.730        | 90.02           | 93.30             |
| 2                   |           | 38.240             | 103.138         | 28.973         | 9.98            | 6.70              |
| <b>Total:</b>       |           |                    | <b>1033.858</b> | <b>432.703</b> | <b>100.00</b>   | <b>100.00</b>     |

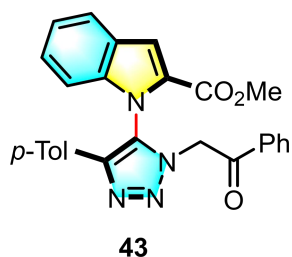

White solid, 39.6 mg, 88% yield, 94.5:5.5 er. [Chiral HPLC analysis of the product: Phenomenex 00G-4457-E0 250X4.6 mm 5u column; *n*-hexane/2-propanol = 80/20, flow rate = 1.0 mL/min,  $\lambda$  = 254 nm, *t* (major) = 49.37 min, *t* (minor) = 61.88 min].  $[\alpha]_D^{26} = -65.6^\circ$  (*c* = 0.9, CHCl<sub>3</sub>). **<sup>1</sup>H NMR (500 MHz, CDCl<sub>3</sub>)**  $\delta$  7.77 (d, *J* = 7.6 Hz, 2H), 7.69 (d, *J* = 7.9 Hz, 1H), 7.58-7.52 (m, 2H), 7.40 (t, *J* = 7.8 Hz, 2H), 7.29 (d, *J* = 7.8 Hz, 1H), 7.21 (t, *J* = 7.5 Hz, 1H), 7.12 (d, *J* = 8.3 Hz, 1H), 7.06 (d, *J* = 8.1 Hz, 2H), 6.96 (d, *J* = 8.1 Hz, 2H), 5.88 (d, *J* = 17.5 Hz, 1H), 5.44 (d, *J* = 17.5 Hz, 1H), 3.78 (s, 3H), 2.22 (s, 3H). **<sup>13</sup>C NMR (126 MHz, CDCl<sub>3</sub>)**  $\delta$  189.9, 161.1, 142.2, 140.2, 138.3, 134.3, 134.2, 129.7, 129.5, 129.0, 128.6, 128.2, 127.4, 127.1, 126.5, 125.4, 123.0, 122.8, 115.0, 112.5, 53.7, 52.3, 21.3. **HRMS (ESI, *m/z*)** Calcd for C<sub>27</sub>H<sub>23</sub>N<sub>4</sub>O<sub>3</sub> (M+H)<sup>+</sup>: 451.1765; Found: 451.1751.

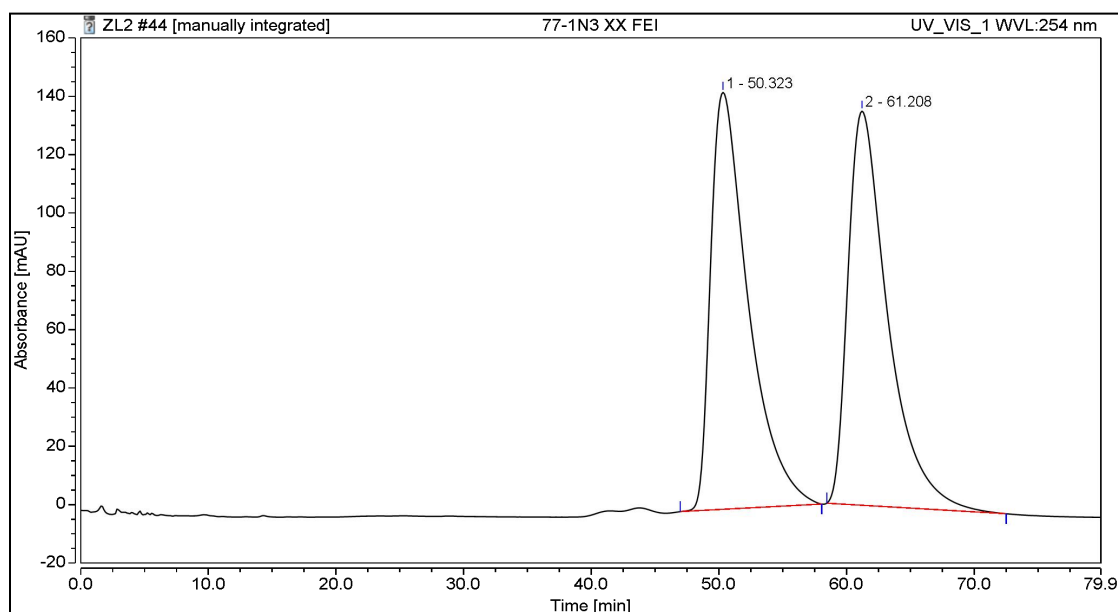

| Integration Results |           |                       |                 |                |                    |                      |
|---------------------|-----------|-----------------------|-----------------|----------------|--------------------|----------------------|
| No.                 | Peak Name | Retention Time<br>min | Area<br>mAU*min | Height<br>mAU  | Relative Area<br>% | Relative Height<br>% |
| 1                   |           | 50.323                | 487.913         | 142.939        | 49.92              | 51.40                |
| 2                   |           | 61.208                | 489.410         | 135.125        | 50.08              | 48.60                |
| <b>Total:</b>       |           |                       | <b>977.323</b>  | <b>278.064</b> | <b>100.00</b>      | <b>100.00</b>        |

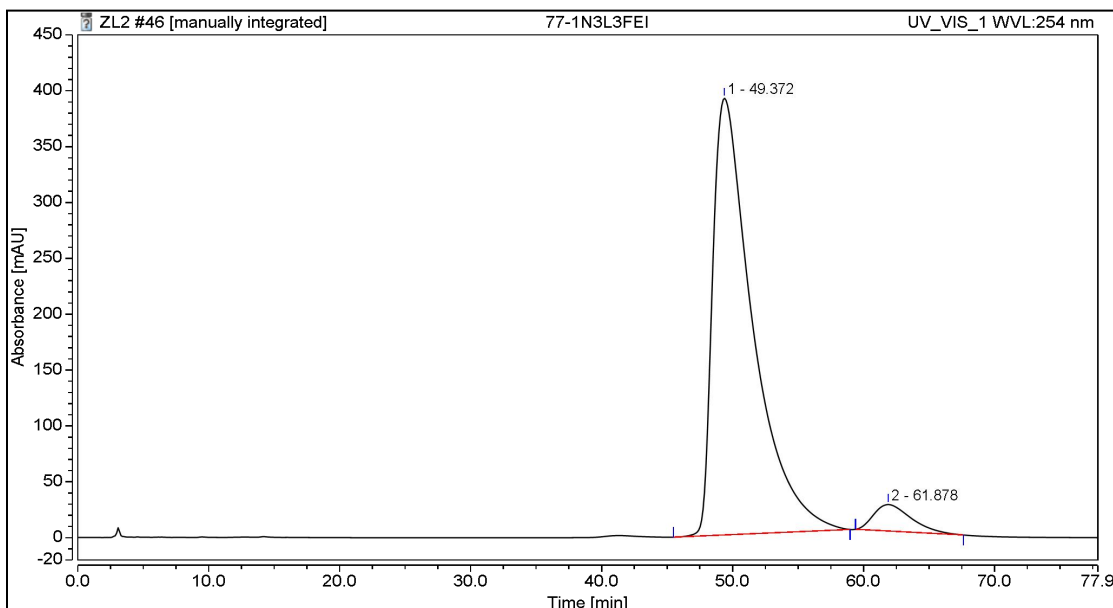

| Integration Results |           |                       |                 |                |                    |                      |
|---------------------|-----------|-----------------------|-----------------|----------------|--------------------|----------------------|
| No.                 | Peak Name | Retention Time<br>min | Area<br>mAU*min | Height<br>mAU  | Relative Area<br>% | Relative Height<br>% |
| 1                   |           | 49.372                | 1384.856        | 390.914        | 94.60              | 94.29                |
| 2                   |           | 61.878                | 78.994          | 23.662         | 5.40               | 5.71                 |
| <b>Total:</b>       |           |                       | <b>1463.850</b> | <b>414.576</b> | <b>100.00</b>      | <b>100.00</b>        |

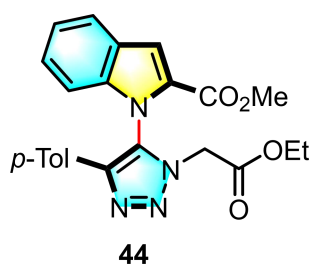

White solid, 37.2 mg, 89% yield, 96.5:3.5 er. [Chiral HPLC analysis of the product: Daicel Chiralcel OD-H 250X4.6 mm 5u column; *n*-hexane/2-propanol = 90/10, flow rate = 1.0 mL/min,  $\lambda$  = 254 nm,  $t$  (major) = 15.32 min,  $t$  (minor) = 22.17 min].  $[\alpha]_D^{26} = -243.2^\circ$  ( $c = 1.0$ ,  $\text{CHCl}_3$ ).  $^1\text{H NMR}$  (500 MHz,  $\text{CDCl}_3$ )  $\delta$  7.76 (d,  $J = 7.6$  Hz, 1H), 7.60 (s, 1H), 7.31-7.23 (m, 2H), 7.08 (d,  $J = 8.2$  Hz, 2H), 7.04 (d,  $J = 7.5$  Hz, 1H), 6.97 (d,  $J = 8.1$  Hz, 2H), 5.12 (d,  $J = 17.4$  Hz, 1H), 4.77 (d,  $J = 17.4$  Hz, 1H), 3.98 (q,  $J = 7.1$  Hz, 2H), 3.77 (s, 3H), 2.22 (s, 3H), 1.07 (t,  $J = 7.1$  Hz, 3H).  $^{13}\text{C NMR}$  (126 MHz,  $\text{CDCl}_3$ )  $\delta$  165.8, 161.0, 142.0, 139.9, 138.4, 129.5, 129.1, 128.5, 127.2, 127.1, 126.3, 125.4, 123.1, 123.0, 114.9, 112.2, 62.4, 52.3, 48.8, 21.3, 13.9. **HRMS (ESI,  $m/z$ )** Calcd for  $\text{C}_{23}\text{H}_{23}\text{N}_4\text{O}_4$  ( $\text{M}+\text{H}$ ) $^+$ : 419.1714; Found: 419.1716.

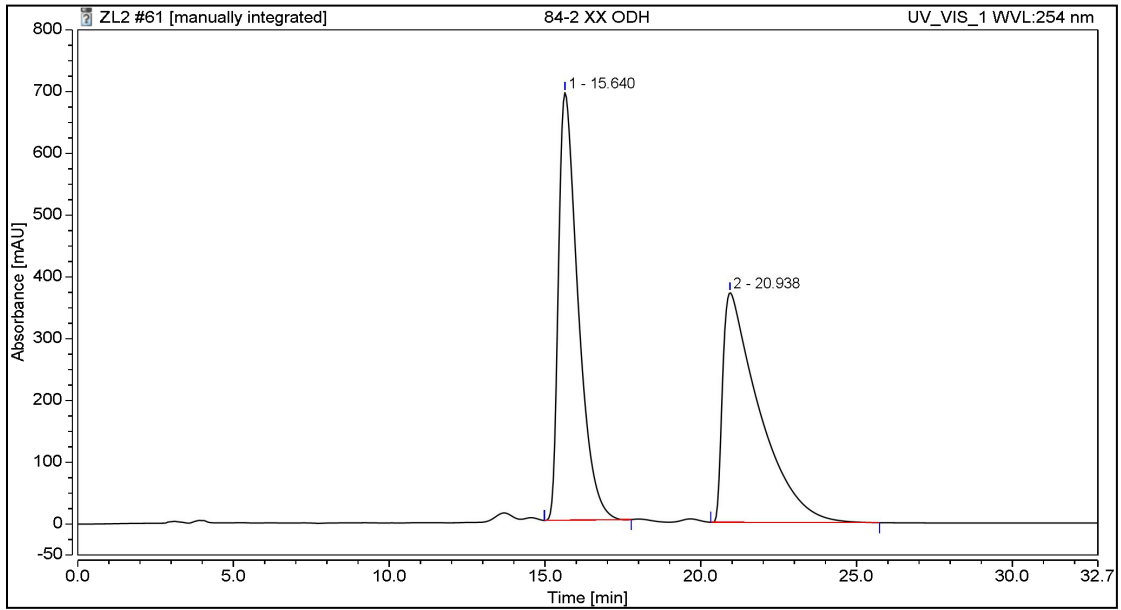

| Integration Results |           |                       |                 |                 |                    |                      |
|---------------------|-----------|-----------------------|-----------------|-----------------|--------------------|----------------------|
| No.                 | Peak Name | Retention Time<br>min | Area<br>mAU*min | Height<br>mAU   | Relative Area<br>% | Relative Height<br>% |
| 1                   |           | 15.640                | 505.521         | 692.498         | 49.99              | 65.07                |
| 2                   |           | 20.938                | 505.726         | 371.810         | 50.01              | 34.93                |
| <b>Total:</b>       |           |                       | <b>1011.248</b> | <b>1064.308</b> | <b>100.00</b>      | <b>100.00</b>        |

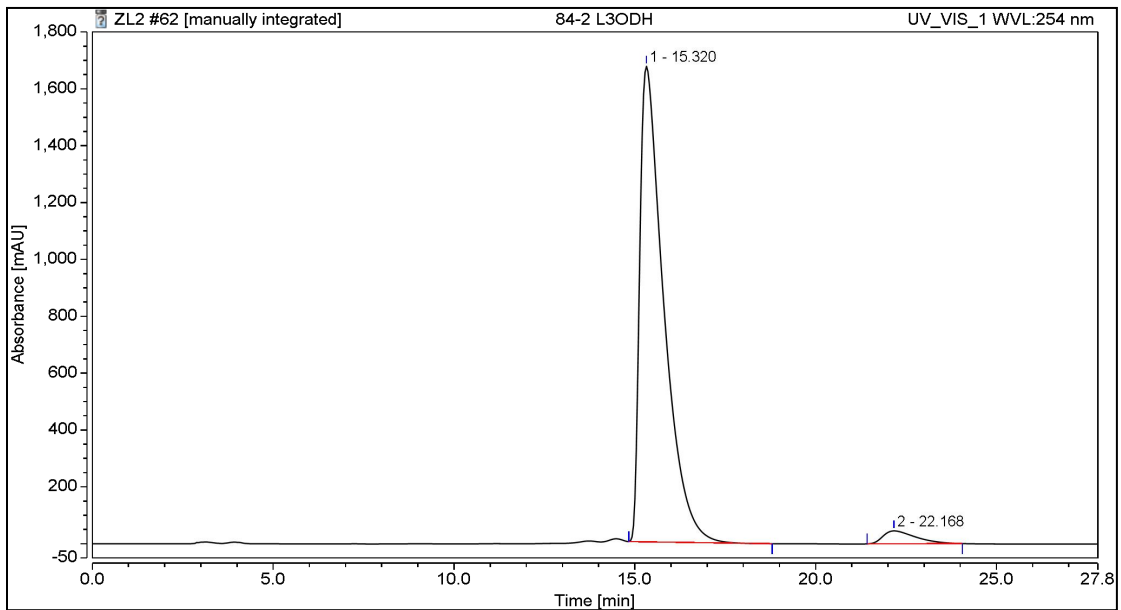

| Integration Results |           |                       |                 |                 |                    |                      |
|---------------------|-----------|-----------------------|-----------------|-----------------|--------------------|----------------------|
| No.                 | Peak Name | Retention Time<br>min | Area<br>mAU*min | Height<br>mAU   | Relative Area<br>% | Relative Height<br>% |
| 1                   |           | 15.320                | 1283.973        | 1672.974        | 96.44              | 97.35                |
| 2                   |           | 22.168                | 47.369          | 45.458          | 3.56               | 2.65                 |
| <b>Total:</b>       |           |                       | <b>1331.341</b> | <b>1718.433</b> | <b>100.00</b>      | <b>100.00</b>        |

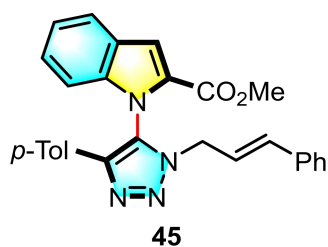

White solid, 43.5 mg, 97% yield, 98:2 er. [Chiral HPLC analysis of the product: Daicel Chiralcel OD-H 250X4.6 mm 5u column; n-hexane/2-propanol = 70/30, flow rate = 1.0 mL/min,  $\lambda = 254$  nm, t (major) = 8.22 min, t (minor) = 10.87 min].  $[\alpha]_D^{23} = -72.3^\circ$  (c = 1.4, CHCl<sub>3</sub>) **<sup>1</sup>H NMR (500 MHz, CDCl<sub>3</sub>)**  $\delta$  7.75 (d, *J* = 6.7 Hz, 1H), 7.56 (s, 1H), 7.27-7.19 (m, 7H), 7.05 (dd, *J* = 7.5, 2.1 Hz, 2H), 7.00 (d, *J* = 8.2 Hz, 2H), 6.91 (d, *J* = 8.1 Hz, 1H), 6.11-6.01 (m, 2H), 4.90-4.83 (m, 1H), 4.81-4.74 (m, 1H), 3.59 (s, 3H), 2.24 (s, 3H). **<sup>13</sup>C NMR (126 MHz, CDCl<sub>3</sub>)**  $\delta$  159.6, 141.3, 138.5, 137.1, 134.4, 134.1, 128.4, 127.5, 127.4, 127.2, 126.1, 125.9, 125.6, 125.5, 124.3, 122.0, 121.7, 120.1, 113.1, 110.1, 50.9, 49.5, 20.2. **HRMS (ESI, m/z)** Calcd for C<sub>28</sub>H<sub>25</sub>N<sub>4</sub>O<sub>2</sub> (M+H)<sup>+</sup>: 449.1972; Found: 449.1968.

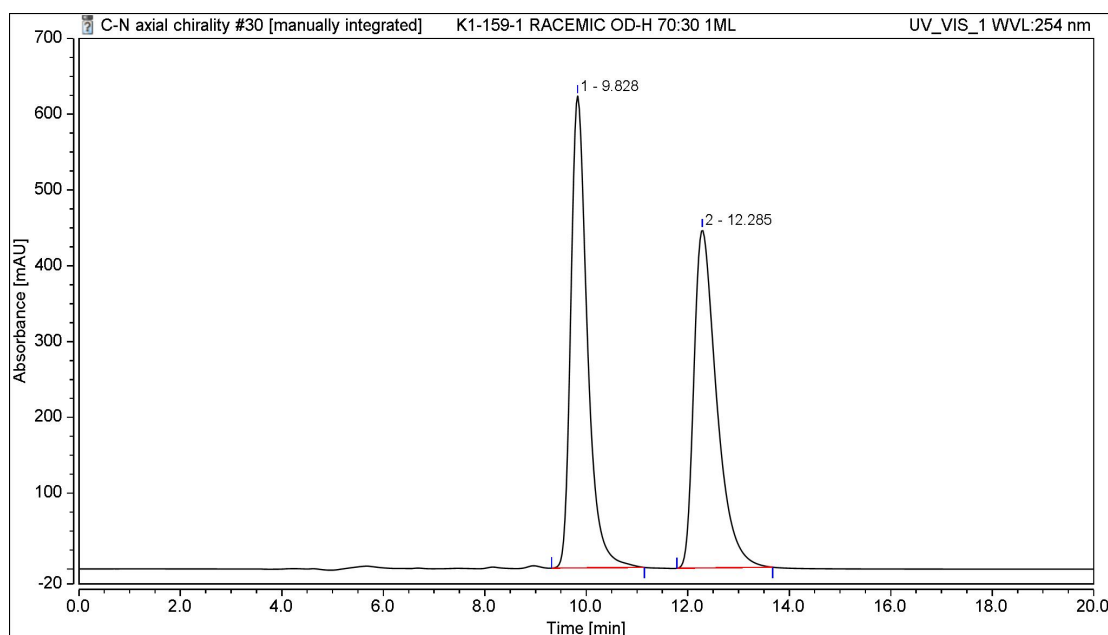

| Integration Results |           |                       |                 |                 |                    |                      |
|---------------------|-----------|-----------------------|-----------------|-----------------|--------------------|----------------------|
| No.                 | Peak Name | Retention Time<br>min | Area<br>mAU*min | Height<br>mAU   | Relative Area<br>% | Relative Height<br>% |
| 1                   |           | 9.828                 | 235.733         | 622.749         | 50.47              | 58.26                |
| 2                   |           | 12.285                | 231.329         | 446.203         | 49.53              | 41.74                |
| <b>Total:</b>       |           |                       | <b>467.062</b>  | <b>1068.953</b> | <b>100.00</b>      | <b>100.00</b>        |

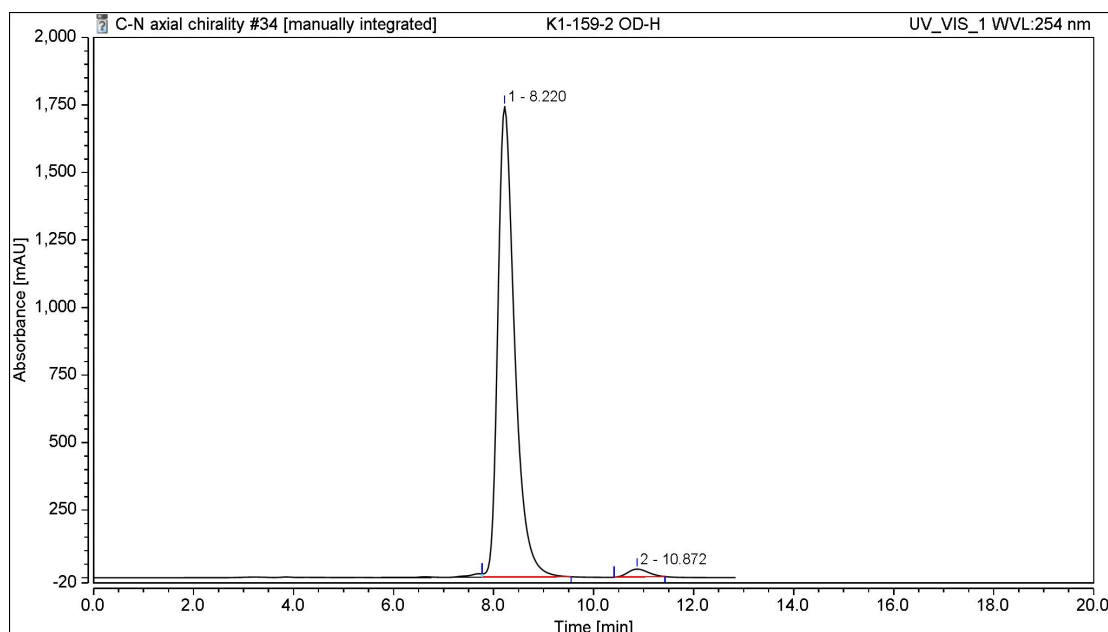

| Integration Results |           |                       |                 |                 |                    |                      |
|---------------------|-----------|-----------------------|-----------------|-----------------|--------------------|----------------------|
| No.                 | Peak Name | Retention Time<br>min | Area<br>mAU*min | Height<br>mAU   | Relative Area<br>% | Relative Height<br>% |
| 1                   |           | 8.220                 | 678.279         | 1742.082        | 98.01              | 98.36                |
| 2                   |           | 10.872                | 13.744          | 29.019          | 1.99               | 1.64                 |
| <b>Total:</b>       |           |                       | <b>692.023</b>  | <b>1771.101</b> | <b>100.00</b>      | <b>100.00</b>        |

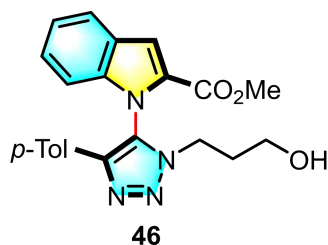

White solid, 32.7 mg, 84% yield, 92.5:7.5 er. [Chiral HPLC analysis of the product: Daicel Chiralcel OD-H 250X4.6 mm 5u column; *n*-hexane/2-propanol = 70/30, flow rate = 1.0 mL/min,  $\lambda$  = 254 nm,  $t$  (major) = 6.00 min,  $t$  (minor) = 14.81 min].  $[\alpha]_D^{26} = -262.3^\circ$  ( $c = 0.9$ ,  $\text{CHCl}_3$ ).  **$^1\text{H NMR}$  (500 MHz,  $\text{CDCl}_3$ )**  $\delta$  7.79 (d,  $J = 7.5$  Hz, 1H), 7.61 (s, 1H), 7.34-7.26 (m, 2H), 7.11 (d,  $J = 8.2$  Hz, 2H), 6.97 (d,  $J = 8.0$  Hz, 2H), 6.92 (d,  $J = 7.4$  Hz, 1H), 4.24-4.08 (m, 2H), 3.74 (s, 3H), 3.64 (t,  $J = 5.8$  Hz, 2H), 2.22 (s, 3H), 2.06-1.93 (m, 2H).  **$^{13}\text{C NMR}$  (126 MHz,  $\text{CDCl}_3$ )**  $\delta$  161.0, 142.0, 139.8, 138.3, 129.5, 128.6, 128.5, 127.4, 127.1, 126.5, 125.3, 123.3, 123.0, 114.6, 111.0, 59.0, 52.3, 44.5, 31.5, 21.3. **HRMS (ESI,  $m/z$ )** Calcd for  $\text{C}_{22}\text{H}_{23}\text{N}_4\text{O}_3$  ( $\text{M}+\text{H}$ ) $^+$ : 391.1765; Found: 391.1741.

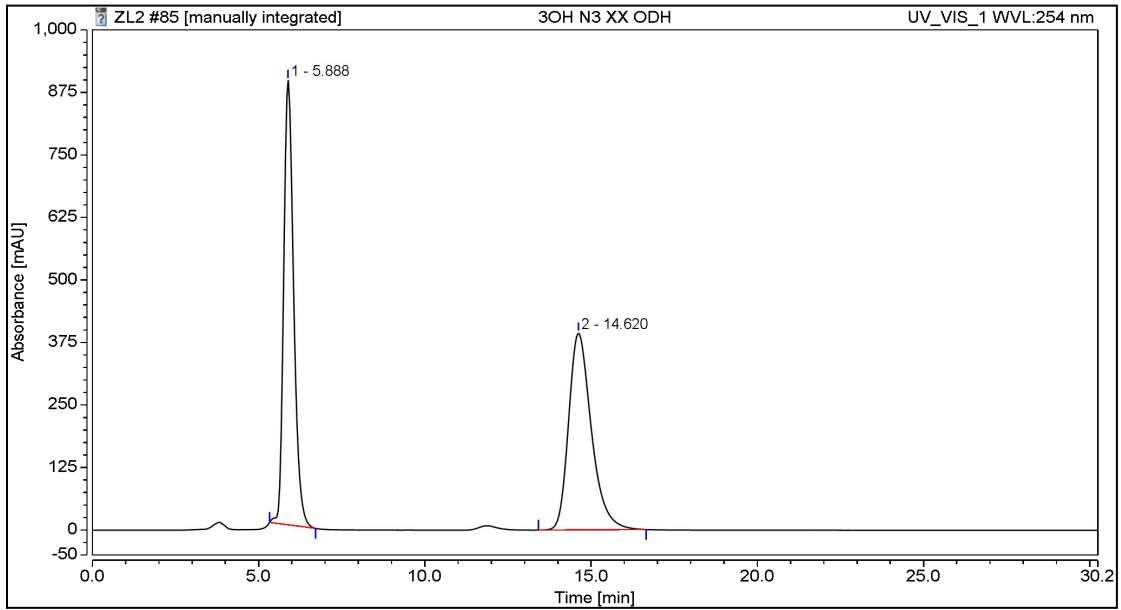

| Integration Results |           |                       |                 |                 |                    |                      |
|---------------------|-----------|-----------------------|-----------------|-----------------|--------------------|----------------------|
| No.                 | Peak Name | Retention Time<br>min | Area<br>mAU*min | Height<br>mAU   | Relative Area<br>% | Relative Height<br>% |
| 1                   |           | 5.888                 | 309.027         | 888.528         | 49.75              | 69.31                |
| 2                   |           | 14.620                | 312.108         | 393.503         | 50.25              | 30.69                |
| <b>Total:</b>       |           |                       | <b>621.135</b>  | <b>1282.032</b> | <b>100.00</b>      | <b>100.00</b>        |

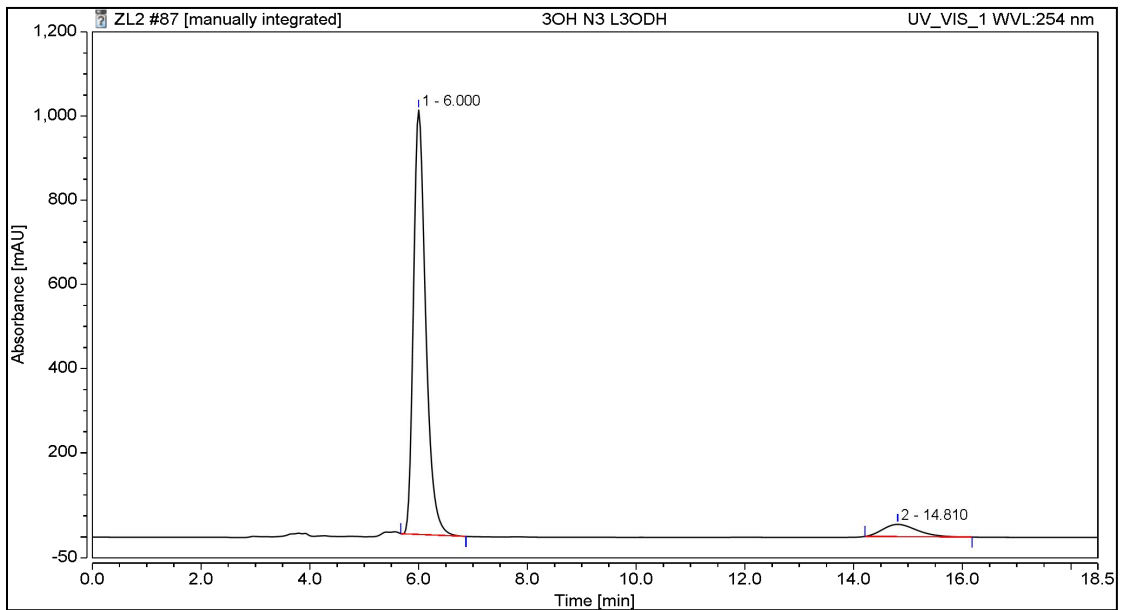

| Integration Results |           |                       |                 |                 |                    |                      |
|---------------------|-----------|-----------------------|-----------------|-----------------|--------------------|----------------------|
| No.                 | Peak Name | Retention Time<br>min | Area<br>mAU*min | Height<br>mAU   | Relative Area<br>% | Relative Height<br>% |
| 1                   |           | 6.000                 | 263.287         | 1008.657        | 92.48              | 97.19                |
| 2                   |           | 14.810                | 21.400          | 29.125          | 7.52               | 2.81                 |
| <b>Total:</b>       |           |                       | <b>284.687</b>  | <b>1037.782</b> | <b>100.00</b>      | <b>100.00</b>        |

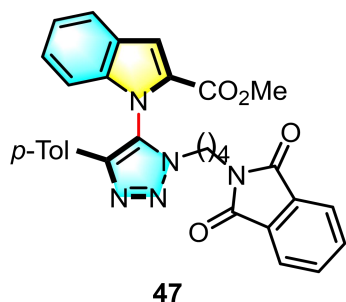

White solid, 46.3 mg, 87% yield, 95:5 er. [Chiral HPLC analysis of the product: Daicel Chiralcel OD-H 250X4.6 mm 5u column; *n*-hexane/2-propanol = 70/30, flow rate = 1.0 mL/min,  $\lambda$  = 254 nm,  $t$  (major) = 13.68 min,  $t$  (minor) = 27.91 min].  $[\alpha]_D^{26} = -184.4^\circ$  ( $c = 1.2$ ,  $\text{CHCl}_3$ ).  **$^1\text{H NMR}$  (500 MHz,  $\text{CDCl}_3$ )**  $\delta$  7.79 (dd,  $J = 5.2, 3.1$  Hz, 2H), 7.75 (d,  $J = 7.9$  Hz, 1H), 7.70 (dd,  $J = 5.3, 3.0$  Hz, 2H), 7.59 (s, 1H), 7.26 (t,  $J = 7.5$  Hz, 1H), 7.20 (t,  $J = 7.4$  Hz, 1H), 7.11 (d,  $J = 8.0$  Hz, 2H), 6.96 (d,  $J = 8.0$  Hz, 2H), 6.89 (d,  $J = 8.2$  Hz, 1H), 4.17-4.01 (m, 2H), 3.75 (s, 3H), 3.56 (t,  $J = 6.7$  Hz, 2H), 2.22 (s, 3H), 1.80-1.59 (m, 4H).  **$^{13}\text{C NMR}$  (126 MHz,  $\text{CDCl}_3$ )**  $\delta$  168.3, 160.8, 142.0, 139.7, 138.2, 134.0, 132.1, 129.5, 128.5, 128.3, 127.4, 127.0, 126.7, 125.4, 123.3, 123.2, 122.9, 114.5, 111.0, 52.2, 47.3, 37.0, 26.4, 25.7, 21.3. **HRMS (ESI,  $m/z$ )** Calcd for  $\text{C}_{31}\text{H}_{28}\text{N}_5\text{O}_4$  ( $\text{M}+\text{H}$ ) $^+$ : 534.2136; Found: 534.2131.

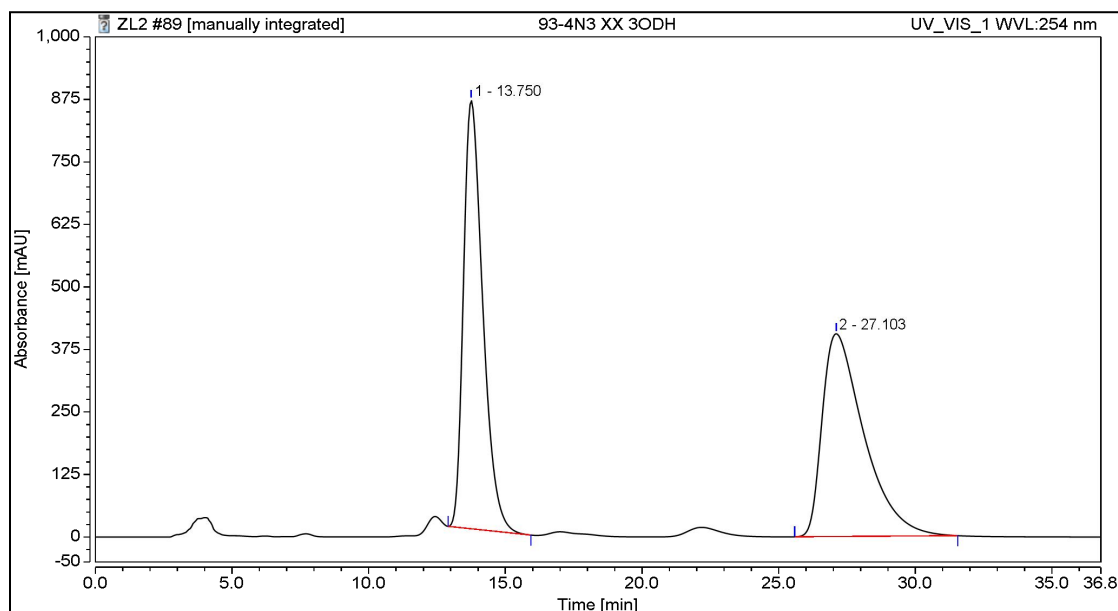

| Integration Results |           |                    |                 |                 |                 |                   |
|---------------------|-----------|--------------------|-----------------|-----------------|-----------------|-------------------|
| No.                 | Peak Name | Retention Time min | Area mAU*min    | Height mAU      | Relative Area % | Relative Height % |
| 1                   |           | 13.750             | 703.499         | 856.581         | 49.51           | 67.87             |
| 2                   |           | 27.103             | 717.504         | 405.582         | 50.49           | 32.13             |
| <b>Total:</b>       |           |                    | <b>1421.003</b> | <b>1262.163</b> | <b>100.00</b>   | <b>100.00</b>     |



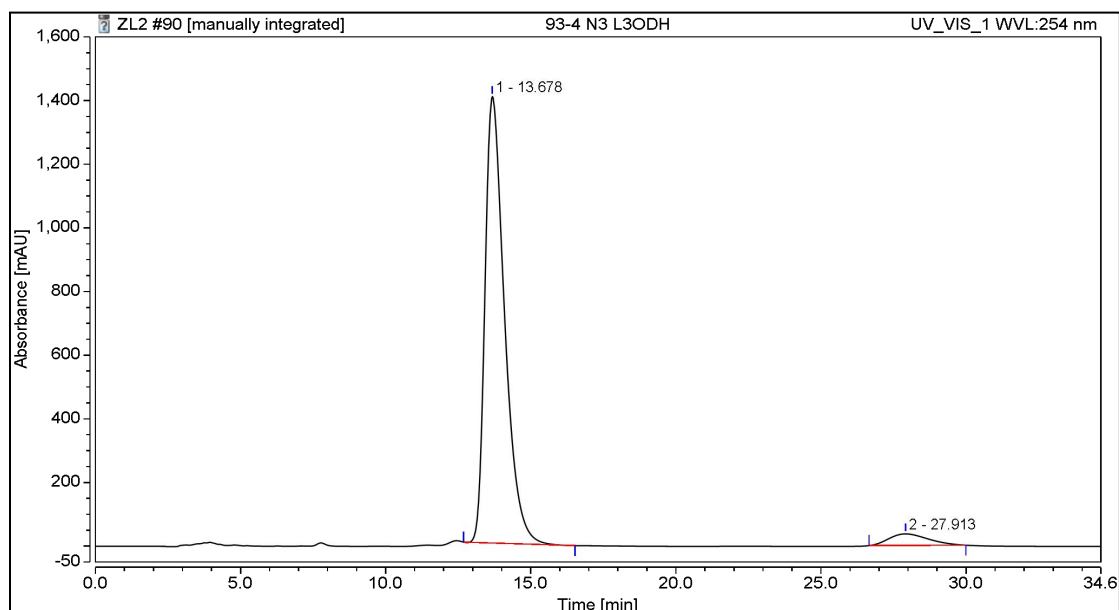

| Integration Results |           |                       |                 |                 |                    |                      |
|---------------------|-----------|-----------------------|-----------------|-----------------|--------------------|----------------------|
| No.                 | Peak Name | Retention Time<br>min | Area<br>mAU*min | Height<br>mAU   | Relative Area<br>% | Relative Height<br>% |
| 1                   |           | 13.678                | 1095.763        | 1403.428        | 95.06              | 97.48                |
| 2                   |           | 27.913                | 56.923          | 36.334          | 4.94               | 2.52                 |
| <b>Total:</b>       |           |                       | <b>1152.686</b> | <b>1439.761</b> | <b>100.00</b>      | <b>100.00</b>        |

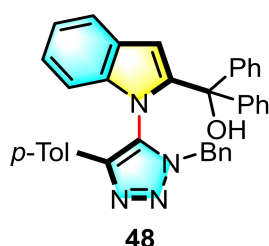

White solid, 41.5 mg, 76% yield, 95.5:4.5 er. [Chiral HPLC analysis of the product: Daicel Chiralpak AS-H 250X4.6 mm 5u column; *n*-hexane/2-propanol = 80/20, flow rate = 1.0 mL/min,  $\lambda$  = 254 nm,  $t$  (major) = 11.12 min,  $t$  (minor) = 27.05 min].  $[\alpha]_D^{26} = -7.8^\circ$  ( $c = 1.2$ ,  $\text{CHCl}_3$ ).  **$^1\text{H NMR}$  (500 MHz,  $\text{CDCl}_3$ )**  $\delta$  7.53 (d,  $J = 7.9$  Hz, 1H), 7.43-7.34 (m, 5H), 7.13-6.96 (m, 11H), 6.92-6.80 (m, 5H), 6.28 (s, 1H), 6.21 (d,  $J = 8.2$  Hz, 1H), 5.10 (d,  $J = 15.0$  Hz, 1H), 4.55 (d,  $J = 15.0$  Hz, 1H), 2.63 (s, 1H), 2.26 (s, 3H).  **$^{13}\text{C NMR}$  (126 MHz,  $\text{CDCl}_3$ )**  $\delta$  144.8, 144.5, 143.4, 142.8, 139.6, 137.7, 134.1, 129.1, 128.9, 128.6, 128.4, 128.3, 128.3, 128.2, 127.9, 127.9, 127.8, 127.0, 126.0, 123.8, 121.5, 120.9, 110.6, 109.1, 79.4, 51.6, 21.3. **HRMS (ESI,  $m/z$ )** Calcd for  $\text{C}_{37}\text{H}_{31}\text{N}_4\text{O}$  ( $\text{M}+\text{H}$ ) $^+$ : 547.2492; Found: 547.2478.

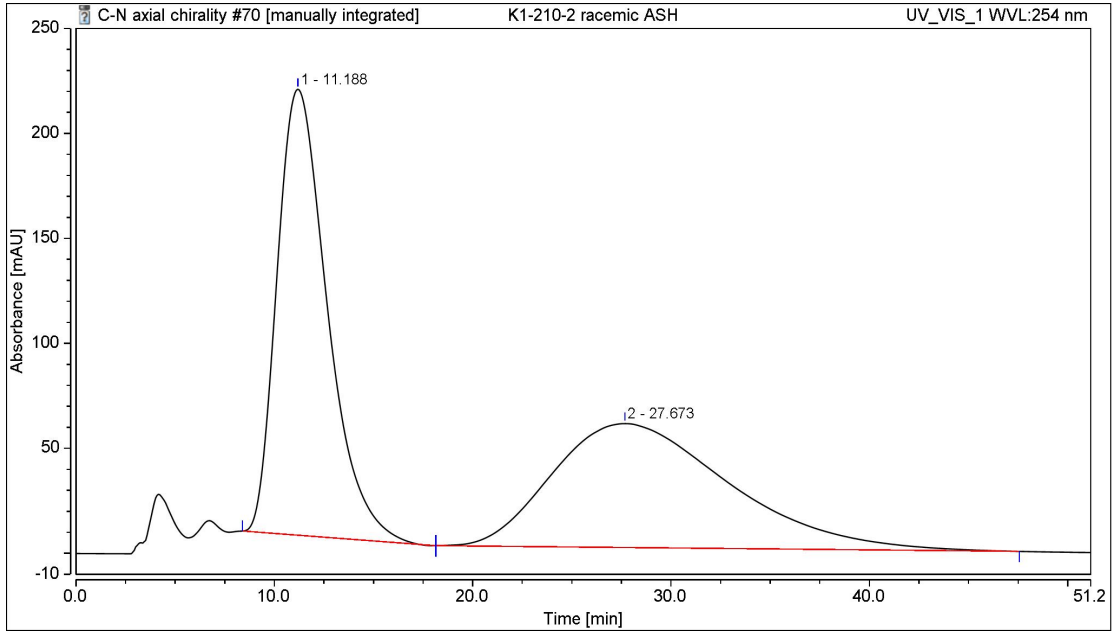

| Integration Results |           |                    |                 |                |                 |                   |
|---------------------|-----------|--------------------|-----------------|----------------|-----------------|-------------------|
| No.                 | Peak Name | Retention Time min | Area mAU*min    | Height mAU     | Relative Area % | Relative Height % |
| 1                   |           | 11.188             | 623.547         | 212.448        | 50.57           | 78.26             |
| 2                   |           | 27.673             | 609.601         | 59.025         | 49.43           | 21.74             |
| <b>Total:</b>       |           |                    | <b>1233.148</b> | <b>271.473</b> | <b>100.00</b>   | <b>100.00</b>     |

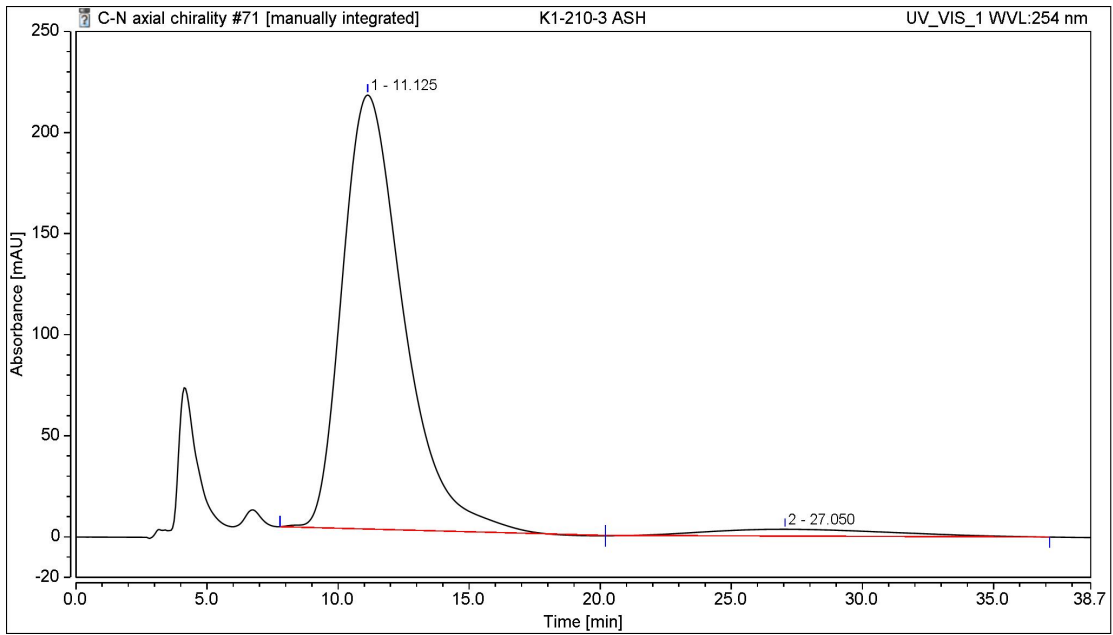

| Integration Results |           |                    |                |                |                 |                   |
|---------------------|-----------|--------------------|----------------|----------------|-----------------|-------------------|
| No.                 | Peak Name | Retention Time min | Area mAU*min   | Height mAU     | Relative Area % | Relative Height % |
| 1                   |           | 11.125             | 579.613        | 214.700        | 95.45           | 98.45             |
| 2                   |           | 27.050             | 27.658         | 3.380          | 4.55            | 1.55              |
| <b>Total:</b>       |           |                    | <b>607.271</b> | <b>218.080</b> | <b>100.00</b>   | <b>100.00</b>     |

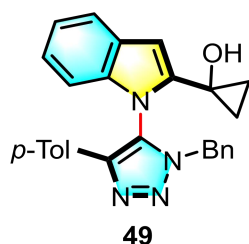

White solid, 18.6 mg, 43% yield, 99:1 er. [Chiral HPLC analysis of the product: Phenomenex 00G-4457-E0 250X4.6 mm 5u column; *n*-hexane/2-propanol = 90/10, flow rate = 1.0 mL/min,  $\lambda$  = 254 nm, *t* (major) = 29.16 min, *t* (minor) = 37.38 min].  $[\alpha]_D^{26} = -75.9^\circ$  (*c* = 0.5, CHCl<sub>3</sub>). <sup>1</sup>H NMR (500 MHz, CDCl<sub>3</sub>)  $\delta$  7.60 (d, *J* = 7.9 Hz, 1H), 7.16-7.10 (m, 4H), 7.06 (t, *J* = 7.6 Hz, 2H), 6.97 (d, *J* = 8.1 Hz, 2H), 6.94-6.86 (m, 3H), 6.63 (s, 1H), 6.38 (d, *J* = 8.2 Hz, 1H), 5.31 (d, *J* = 15.0 Hz, 1H), 5.27 (d, *J* = 15.0 Hz, 1H), 3.72 (s, 1H), 2.22 (s, 3H), 1.09-1.04 (m, 1H), 1.02-0.94 (m, 2H), 0.52-0.45 (m, 1H). <sup>13</sup>C NMR (126 MHz, CDCl<sub>3</sub>)  $\delta$  142.7, 142.2, 138.4, 133.9, 129.6, 128.8, 128.7, 128.6, 128.5, 127.8, 126.7, 125.6, 123.6, 121.5, 121.1, 110.1, 103.9, 52.4, 50.5, 21.3, 15.9, 14.0. HRMS (ESI, *m/z*) Calcd for C<sub>27</sub>H<sub>25</sub>N<sub>4</sub>O (M+H)<sup>+</sup>: 421.2023; Found: 421.2033.

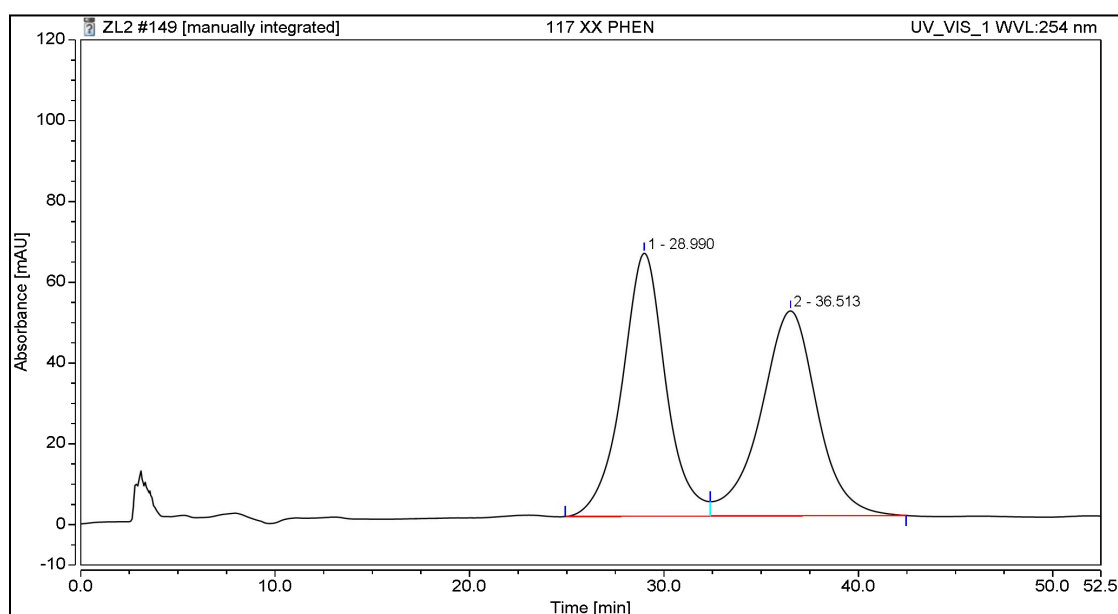

| Integration Results |           |                       |                 |                |                    |                      |
|---------------------|-----------|-----------------------|-----------------|----------------|--------------------|----------------------|
| No.                 | Peak Name | Retention Time<br>min | Area<br>mAU*min | Height<br>mAU  | Relative Area<br>% | Relative Height<br>% |
| 1                   |           | 28.990                | 169.456         | 65.153         | 49.87              | 56.22                |
| 2                   |           | 36.513                | 170.320         | 50.746         | 50.13              | 43.78                |
| <b>Total:</b>       |           |                       | <b>339.777</b>  | <b>115.899</b> | <b>100.00</b>      | <b>100.00</b>        |

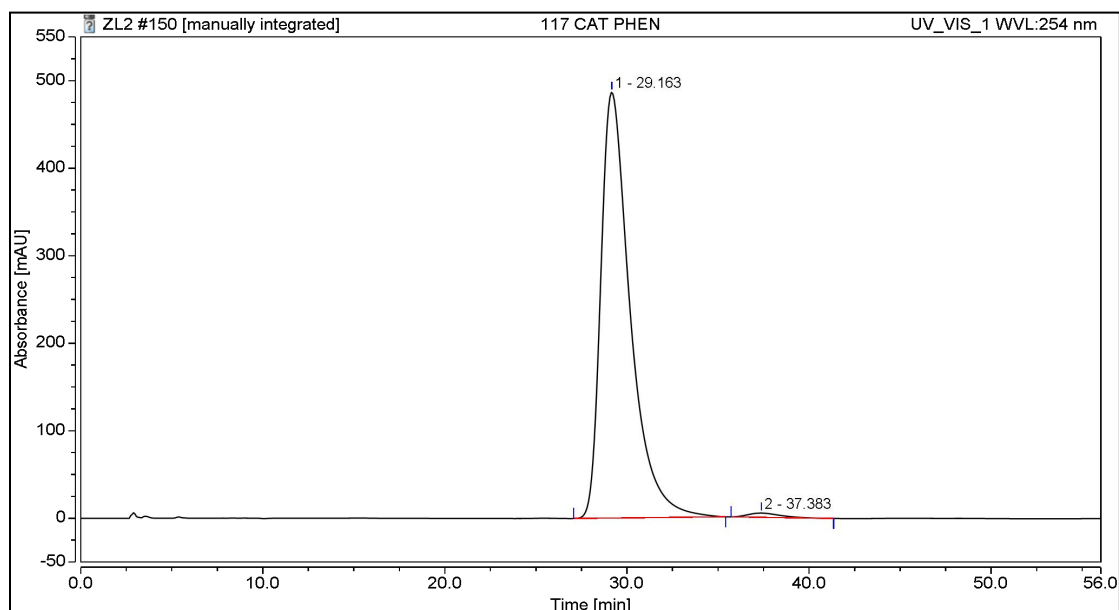

| Integration Results |           |                       |                 |                |                    |                      |
|---------------------|-----------|-----------------------|-----------------|----------------|--------------------|----------------------|
| No.                 | Peak Name | Retention Time<br>min | Area<br>mAU*min | Height<br>mAU  | Relative Area<br>% | Relative Height<br>% |
| 1                   |           | 29.163                | 911.088         | 486.701        | 98.90              | 99.01                |
| 2                   |           | 37.383                | 10.175          | 4.891          | 1.10               | 0.99                 |
| <b>Total:</b>       |           |                       | <b>921.263</b>  | <b>491.592</b> | <b>100.00</b>      | <b>100.00</b>        |

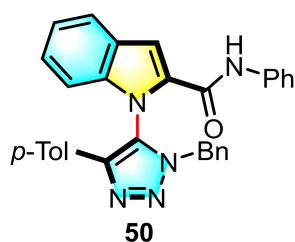

White solid, 37.6 mg, 78% yield, 98.5:1.5 er. [Chiral HPLC analysis of the product: Daicel Chiralcel OD-H 250X4.6 mm 5u column; *n*-hexane/2-propanol = 70/30, flow rate = 1.0 mL/min,  $\lambda = 254$  nm,  $t$  (major) = 4.84 min,  $t$  (minor) = 6.18 min].  $[\alpha]_D^{26} = -20.4^\circ$  ( $c = 1.0$ ,  $\text{CHCl}_3$ ).  **$^1\text{H NMR}$  (500 MHz,  $\text{CDCl}_3$ )**  $\delta$  7.95 (s, 1H), 7.66 (d,  $J = 8.0$  Hz, 1H), 7.43 (d,  $J = 7.9$  Hz, 2H), 7.37 (s, 1H), 7.26 (t,  $J = 8.0$  Hz, 2H), 7.20 (d,  $J = 8.2$  Hz, 2H), 7.15 (t,  $J = 7.5$  Hz, 1H), 7.08 (t,  $J = 7.4$  Hz, 1H), 7.05-6.99 (m, 2H), 6.97 (t,  $J = 7.3$  Hz, 2H), 6.91 (t,  $J = 9.0$  Hz, 4H), 6.46 (d,  $J = 8.3$  Hz, 1H), 5.44 (d,  $J = 15.0$  Hz, 1H), 5.27 (d,  $J = 15.0$  Hz, 1H), 2.17 (s, 3H).  **$^{13}\text{C NMR}$  (126 MHz,  $\text{CDCl}_3$ )**  $\delta$  158.3, 142.4, 139.1, 138.2, 137.4, 133.6, 132.3, 129.5, 129.1, 128.6, 128.5, 128.3, 128.3, 126.8, 126.6, 126.3, 125.5, 124.7, 122.6, 122.4, 120.3, 111.0, 108.9, 52.6, 21.3. **HRMS (ESI,  $m/z$ )** Calcd for  $\text{C}_{31}\text{H}_{26}\text{N}_5\text{O}$  ( $\text{M}+\text{H}$ ) $^+$ : 484.2132; Found: 484.2130.

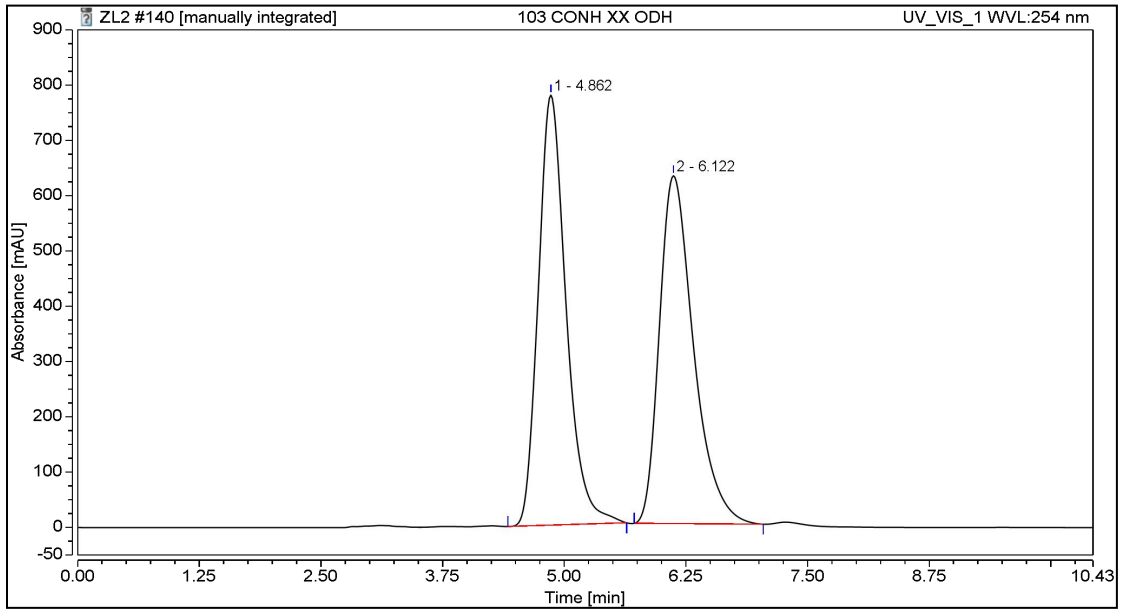

| Integration Results |           |                       |                 |                 |                    |                      |
|---------------------|-----------|-----------------------|-----------------|-----------------|--------------------|----------------------|
| No.                 | Peak Name | Retention Time<br>min | Area<br>mAU*min | Height<br>mAU   | Relative Area<br>% | Relative Height<br>% |
| 1                   |           | 4.862                 | 257.629         | 778.075         | 50.19              | 55.29                |
| 2                   |           | 6.122                 | 255.629         | 629.303         | 49.81              | 44.71                |
| <b>Total:</b>       |           |                       | <b>513.258</b>  | <b>1407.378</b> | <b>100.00</b>      | <b>100.00</b>        |

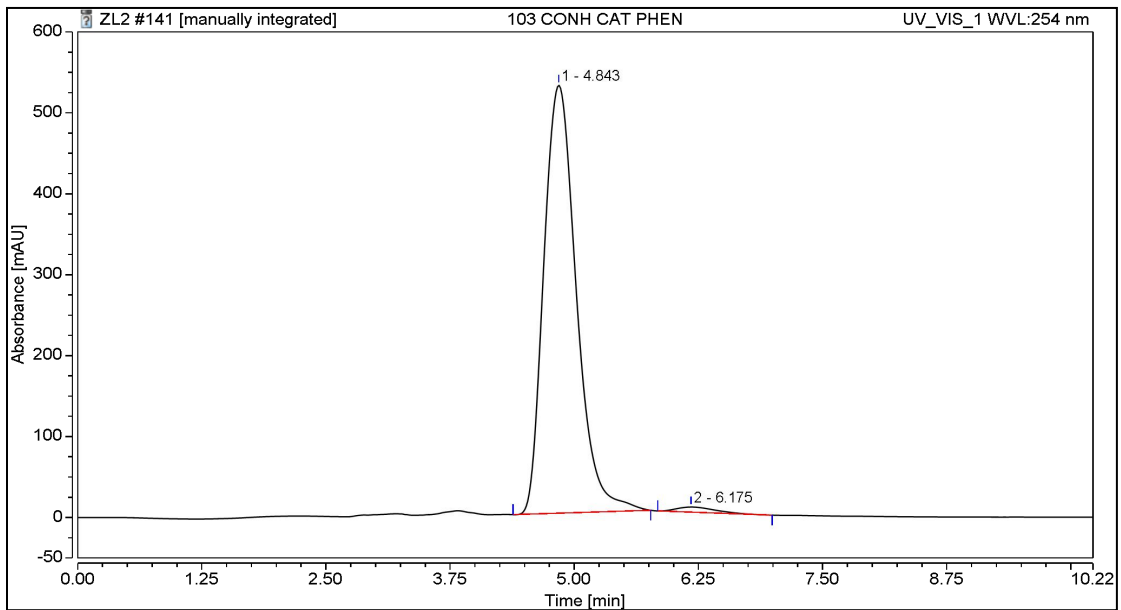

| Integration Results |           |                       |                 |                |                    |                      |
|---------------------|-----------|-----------------------|-----------------|----------------|--------------------|----------------------|
| No.                 | Peak Name | Retention Time<br>min | Area<br>mAU*min | Height<br>mAU  | Relative Area<br>% | Relative Height<br>% |
| 1                   |           | 4.843                 | 200.646         | 528.855        | 98.58              | 98.82                |
| 2                   |           | 6.175                 | 2.886           | 6.341          | 1.42               | 1.18                 |
| <b>Total:</b>       |           |                       | <b>203.532</b>  | <b>535.196</b> | <b>100.00</b>      | <b>100.00</b>        |

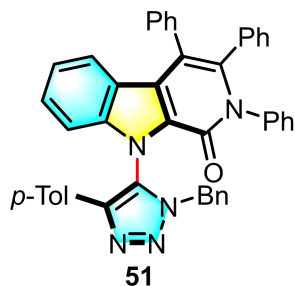

White solid, 43.5 mg, 67% yield, 96.5:3.5 er. [Chiral HPLC analysis of the product: Phenomenex 00G-4457-E0 250X4.6 mm 5u column; *n*-hexane/2-propanol = 90/10, flow rate = 1.0 mL/min,  $\lambda$  = 254 nm, *t* (major) = 22.45 min, *t* (minor) = 33.48 min].  $[\alpha]_D^{26} = -32.8^\circ$  (*c* = 0.9, CHCl<sub>3</sub>). **<sup>1</sup>H NMR (500 MHz, CDCl<sub>3</sub>)**  $\delta$  7.39-7.28 (m, 7H), 7.24-7.16 (m, 2H), 7.15-7.06 (m, 5H), 7.05-6.98 (m, 5H), 6.97-6.88 (m, 7H), 6.74 (d, *J* = 8.1 Hz, 1H), 6.64 (d, *J* = 8.3 Hz, 1H), 5.53 (d, *J* = 15.0 Hz, 1H), 5.30 (d, *J* = 15.0 Hz, 1H), 2.25 (s, 3H). **<sup>13</sup>C NMR (126 MHz, CDCl<sub>3</sub>)**  $\delta$  155.1, 142.4, 140.8, 140.2, 138.9, 137.9, 136.6, 134.3, 133.8, 131.5, 131.4, 131.2, 131.1, 129.8, 129.5, 129.3, 128.8, 128.7, 128.5, 128.4, 128.4, 128.3, 128.1, 128.0, 127.9, 127.6, 127.5, 127.4, 127.4, 127.3, 127.1, 126.0, 123.3, 123.1, 121.9, 116.7, 111.2, 52.9, 21.4. **HRMS (ESI, *m/z*)** Calcd for C<sub>45</sub>H<sub>34</sub>N<sub>5</sub>O (*M*+H)<sup>+</sup>: 660.2758; Found: 660.2746.

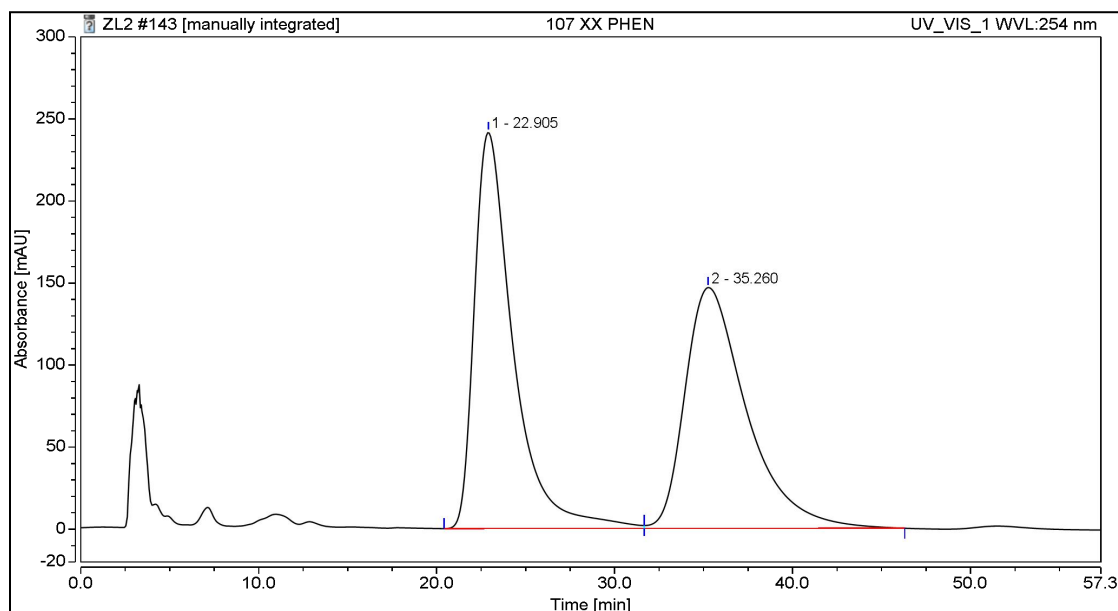

| Integration Results |           |                       |                 |                |                    |                      |
|---------------------|-----------|-----------------------|-----------------|----------------|--------------------|----------------------|
| No.                 | Peak Name | Retention Time<br>min | Area<br>mAU*min | Height<br>mAU  | Relative Area<br>% | Relative Height<br>% |
| 1                   |           | 22.905                | 608.485         | 241.396        | 50.84              | 62.19                |
| 2                   |           | 35.260                | 588.436         | 146.788        | 49.16              | 37.81                |
| <b>Total:</b>       |           |                       | <b>1196.921</b> | <b>388.184</b> | <b>100.00</b>      | <b>100.00</b>        |

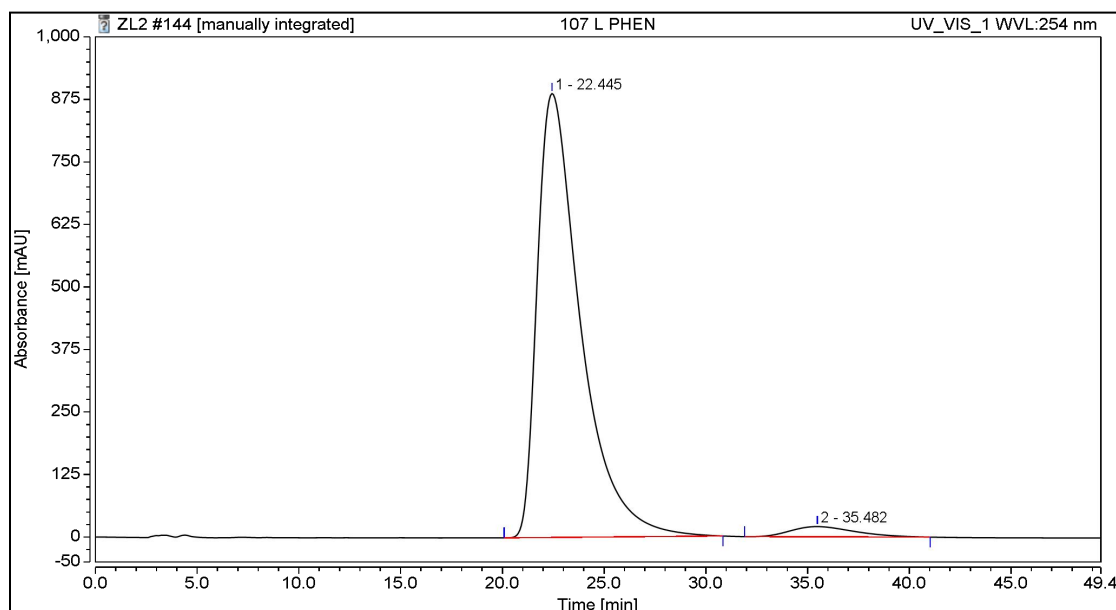

| Integration Results |           |                       |                 |                |                    |                      |
|---------------------|-----------|-----------------------|-----------------|----------------|--------------------|----------------------|
| No.                 | Peak Name | Retention Time<br>min | Area<br>mAU*min | Height<br>mAU  | Relative Area<br>% | Relative Height<br>% |
| 1                   |           | 22.445                | 2187.456        | 887.861        | 96.70              | 97.75                |
| 2                   |           | 35.482                | 74.676          | 20.445         | 3.30               | 2.25                 |
| <b>Total:</b>       |           |                       | <b>2262.133</b> | <b>908.306</b> | <b>100.00</b>      | <b>100.00</b>        |

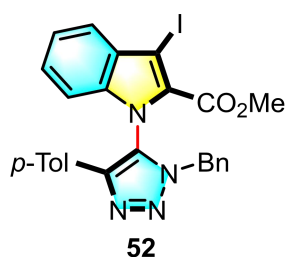

White solid, 53.7 mg, 98% yield, 98:2 er. [Chiral HPLC analysis of the product: Phenomenex 00G-4457-E0 250X4.6 mm 5u column; *n*-hexane/2-propanol = 70/30, flow rate = 1.0 mL/min,  $\lambda$  = 254 nm, *t* (major) = 16.58 min, *t* (minor) = 10.87 min].  $[\alpha]_D^{26} = -44.8^\circ$  (*c* = 0.6, CHCl<sub>3</sub>). **<sup>1</sup>H NMR (500 MHz, CDCl<sub>3</sub>)**  $\delta$  7.63 (d, *J* = 8.1 Hz, 1H), 7.27 (t, *J* = 7.7 Hz, 1H), 7.19 (dd, *J* = 18.2, 7.8 Hz, 3H), 7.12 (t, *J* = 7.3 Hz, 1H), 7.06 (t, *J* = 7.4 Hz, 2H), 6.98 (d, *J* = 8.0 Hz, 2H), 6.86 (d, *J* = 7.4 Hz, 2H), 6.54 (d, *J* = 8.3 Hz, 1H), 5.23 (d, *J* = 15.0 Hz, 1H), 5.16 (d, *J* = 15.0 Hz, 1H), 3.54 (s, 3H), 2.22 (s, 3H). **<sup>13</sup>C NMR (126 MHz, CDCl<sub>3</sub>)**  $\delta$  159.7, 142.5, 138.6, 138.4, 133.1, 131.1, 129.6, 128.6, 128.5, 128.3, 128.3, 128.2, 126.4, 125.4, 124.3, 123.4, 111.1, 73.3, 52.5, 52.0, 21.3. **HRMS (ESI, *m/z*)** Calcd for C<sub>26</sub>H<sub>22</sub>IN<sub>4</sub>O<sub>2</sub> (M+H)<sup>+</sup>: 549.0782; Found: 549.0771.

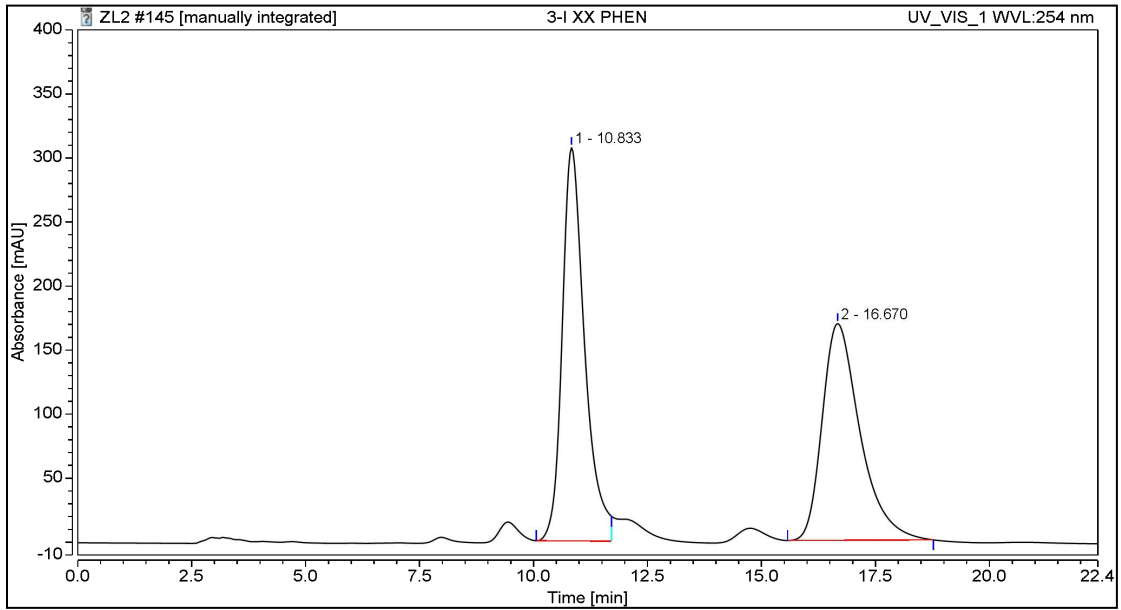

| Integration Results |           |                       |                 |                |                    |                      |
|---------------------|-----------|-----------------------|-----------------|----------------|--------------------|----------------------|
| No.                 | Peak Name | Retention Time<br>min | Area<br>mAU*min | Height<br>mAU  | Relative Area<br>% | Relative Height<br>% |
| 1                   |           | 10.833                | 175.380         | 307.083        | 51.90              | 64.47                |
| 2                   |           | 16.670                | 162.535         | 169.208        | 48.10              | 35.53                |
| <b>Total:</b>       |           |                       | <b>337.915</b>  | <b>476.291</b> | <b>100.00</b>      | <b>100.00</b>        |

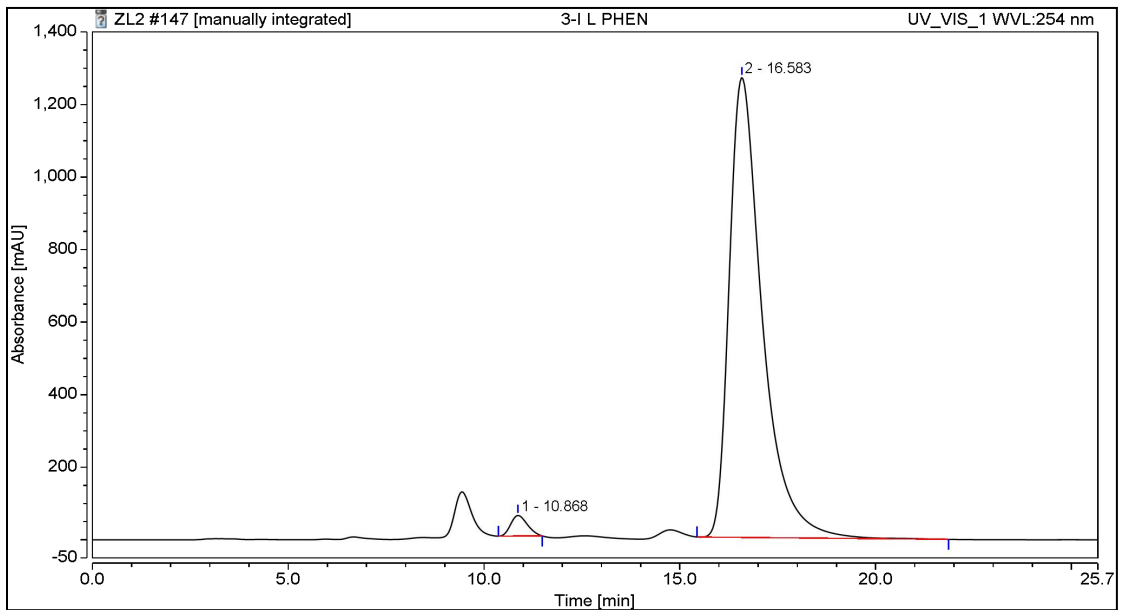

| Integration Results |           |                       |                 |                 |                    |                      |
|---------------------|-----------|-----------------------|-----------------|-----------------|--------------------|----------------------|
| No.                 | Peak Name | Retention Time<br>min | Area<br>mAU*min | Height<br>mAU   | Relative Area<br>% | Relative Height<br>% |
| 1                   |           | 10.868                | 28.028          | 56.777          | 2.21               | 4.29                 |
| 2                   |           | 16.583                | 1241.525        | 1268.031        | 97.79              | 95.71                |
| <b>Total:</b>       |           |                       | <b>1269.553</b> | <b>1324.808</b> | <b>100.00</b>      | <b>100.00</b>        |



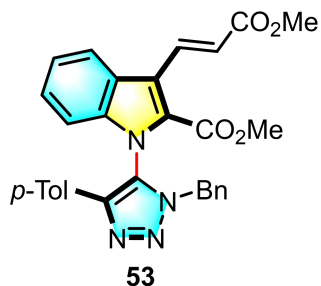

White solid, 46.5 mg, 92% yield, 98:2 er. [Chiral HPLC analysis of the product: Phenomenex 00G-4457-E0 250X4.6 mm 5u column; *n*-hexane/2-propanol = 70/30, flow rate = 1.0 mL/min,  $\lambda$  = 254 nm,  $t$  (major) = 24.57 min,  $t$  (minor) = 15.18 min].  $[\alpha]_D^{26} = -89.1^\circ$  ( $c = 1.1$ ,  $\text{CHCl}_3$ ).  **$^1\text{H NMR}$  (500 MHz,  $\text{CDCl}_3$ )**  $\delta$  8.52 (d,  $J = 16.4$  Hz, 1H), 8.03 (d,  $J = 8.2$  Hz, 1H), 7.30 (t,  $J = 7.3$  Hz, 1H), 7.19 (t,  $J = 8.0$  Hz, 3H), 7.12 (t,  $J = 7.4$  Hz, 1H), 7.06 (t,  $J = 7.5$  Hz, 2H), 6.98 (d,  $J = 8.1$  Hz, 2H), 6.88 (d,  $J = 7.3$  Hz, 2H), 6.78 (d,  $J = 16.4$  Hz, 1H), 6.60 (d,  $J = 8.4$  Hz, 1H), 5.25 (d,  $J = 15.0$  Hz, 1H), 5.18 (d,  $J = 15.0$  Hz, 1H), 3.88 (s, 3H), 3.56 (s, 3H), 2.23 (s, 3H).  **$^{13}\text{C NMR}$  (126 MHz,  $\text{CDCl}_3$ )**  $\delta$  167.5, 160.3, 142.6, 138.7, 138.5, 136.8, 133.2, 129.6, 128.6, 128.6, 128.3, 128.0, 127.7, 127.6, 126.4, 125.4, 125.2, 123.9, 122.3, 122.0, 121.7, 111.5, 52.6, 52.4, 51.9, 29.8, 21.3.

**HRMS (ESI,  $m/z$ )** Calcd for  $\text{C}_{30}\text{H}_{27}\text{N}_4\text{O}_4$  ( $\text{M}+\text{H}$ ) $^+$ : 507.2027; Found: 507.2024.

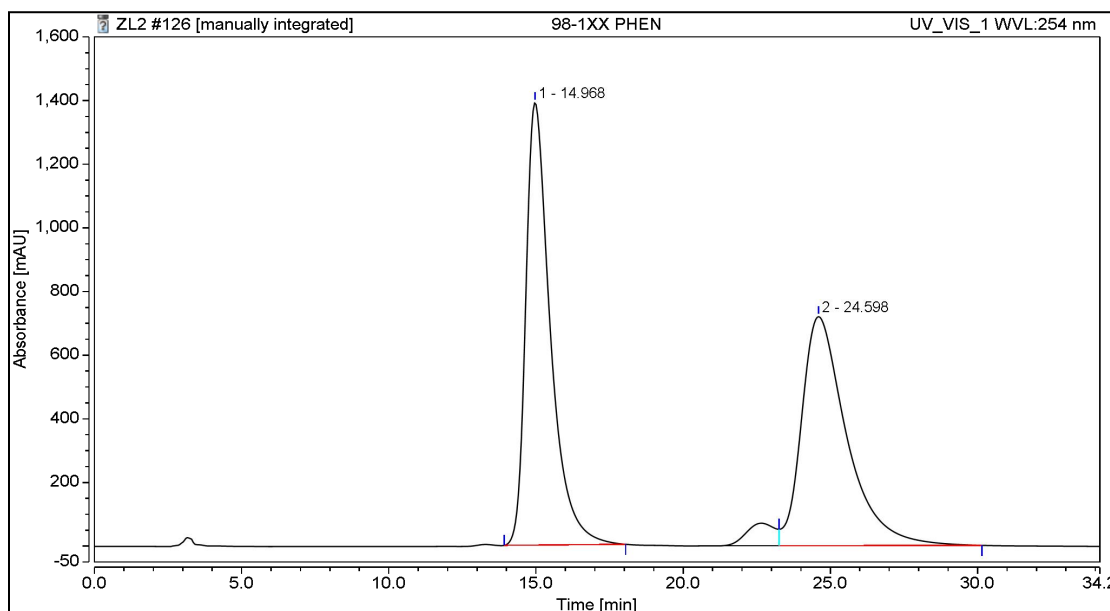

| Integration Results |           |                       |                 |                 |                    |                      |
|---------------------|-----------|-----------------------|-----------------|-----------------|--------------------|----------------------|
| No.                 | Peak Name | Retention Time<br>min | Area<br>mAU*min | Height<br>mAU   | Relative Area<br>% | Relative Height<br>% |
| 1                   |           | 14.968                | 1345.977        | 1391.257        | 51.38              | 65.90                |
| 2                   |           | 24.598                | 1273.454        | 719.847         | 48.62              | 34.10                |
| <b>Total:</b>       |           |                       | <b>2619.430</b> | <b>2111.104</b> | <b>100.00</b>      | <b>100.00</b>        |

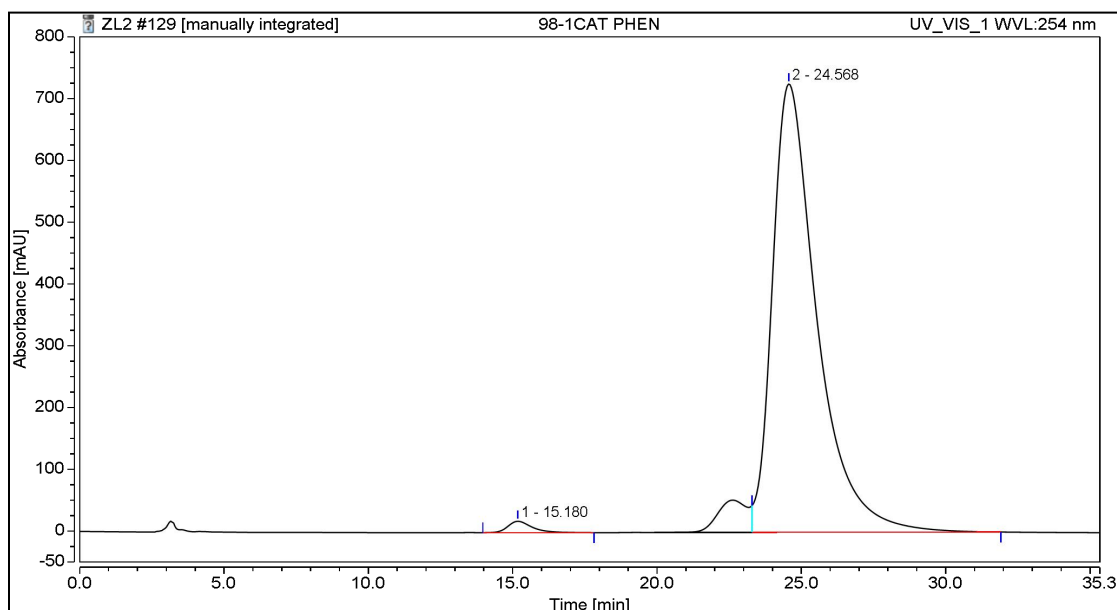

| Integration Results |           |                       |                 |                |                    |                      |
|---------------------|-----------|-----------------------|-----------------|----------------|--------------------|----------------------|
| No.                 | Peak Name | Retention Time<br>min | Area<br>mAU*min | Height<br>mAU  | Relative Area<br>% | Relative Height<br>% |
| 1                   |           | 15.180                | 18.049          | 18.456         | 1.37               | 2.48                 |
| 2                   |           | 24.568                | 1296.624        | 725.891        | 98.63              | 97.52                |
| <b>Total:</b>       |           |                       | <b>1314.673</b> | <b>744.347</b> | <b>100.00</b>      | <b>100.00</b>        |

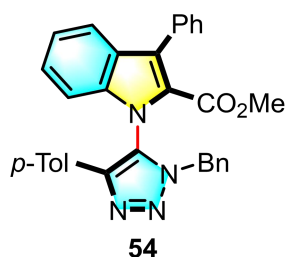

White solid, 46.3 mg, 93% yield, 98:2 er. [Chiral HPLC analysis of the product: Phenomenex 00G-4457-E0 250X4.6 mm 5u column; *n*-hexane/2-propanol = 80/20, flow rate = 1.0 mL/min,  $\lambda$  = 254 nm,  $t$  (major) = 27.19 min,  $t$  (minor) = 17.90 min].  $[\alpha]_D^{26} = -63.3^\circ$  ( $c = 0.8$ ,  $\text{CHCl}_3$ ).  **$^1\text{H NMR}$  (500 MHz,  $\text{CDCl}_3$ )**  $\delta$  7.61 (dd,  $J = 6.2, 2.4$  Hz, 1H), 7.58-7.49 (m, 4H), 7.46 (t,  $J = 7.0$  Hz, 1H), 7.28 (d,  $J = 8.1$  Hz, 2H), 7.21-7.06 (m, 5H), 7.00 (dd,  $J = 18.2, 7.5$  Hz, 4H), 6.63 (dd,  $J = 6.4, 2.2$  Hz, 1H), 5.34 (d,  $J = 14.8$  Hz, 1H), 5.27 (d,  $J = 14.9$  Hz, 1H), 3.35 (s, 3H), 2.25 (s, 3H).  **$^{13}\text{C NMR}$  (126 MHz,  $\text{CDCl}_3$ )**  $\delta$  160.8, 142.6, 138.3, 138.3, 133.5, 132.9, 130.4, 129.6, 129.3, 128.8, 128.6, 128.5, 128.4, 128.2, 128.0, 127.7, 127.4, 126.7, 125.5, 124.2, 122.8, 122.1, 111.0, 52.6, 51.7, 21.3. **HRMS (ESI,  $m/z$ )** Calcd for  $\text{C}_{32}\text{H}_{27}\text{N}_4\text{O}_2$  ( $\text{M}+\text{H}$ )<sup>+</sup>: 499.2129; Found: 499.2130.

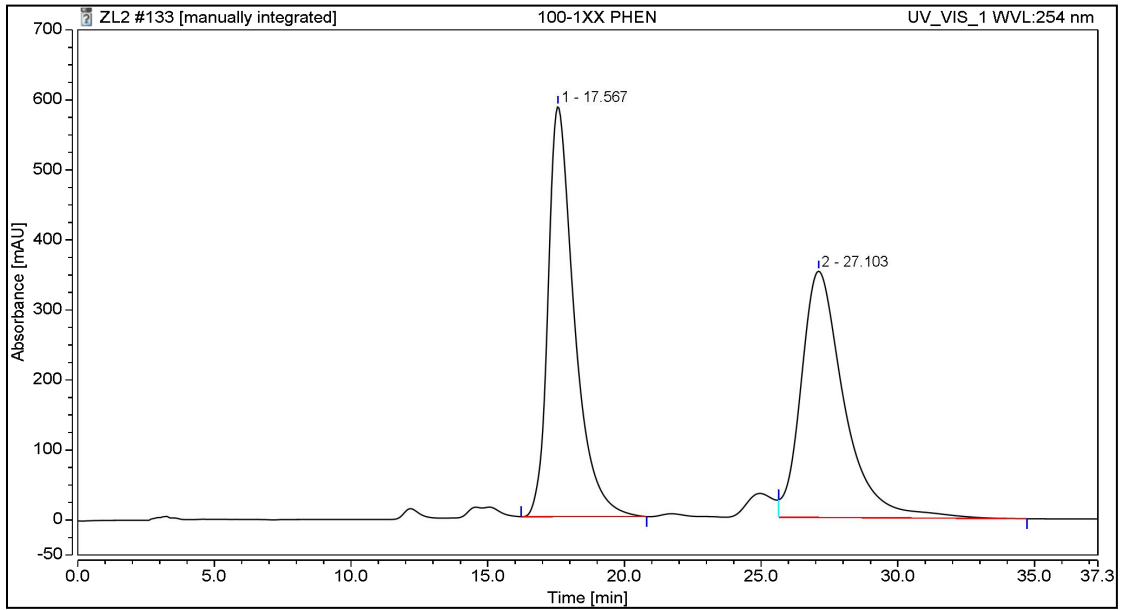

| Integration Results |           |                       |                 |                |                    |                      |
|---------------------|-----------|-----------------------|-----------------|----------------|--------------------|----------------------|
| No.                 | Peak Name | Retention Time<br>min | Area<br>mAU*min | Height<br>mAU  | Relative Area<br>% | Relative Height<br>% |
| 1                   |           | 17.567                | 653.096         | 586.009        | 50.51              | 62.49                |
| 2                   |           | 27.103                | 640.030         | 351.809        | 49.49              | 37.51                |
| <b>Total:</b>       |           |                       | <b>1293.126</b> | <b>937.818</b> | <b>100.00</b>      | <b>100.00</b>        |

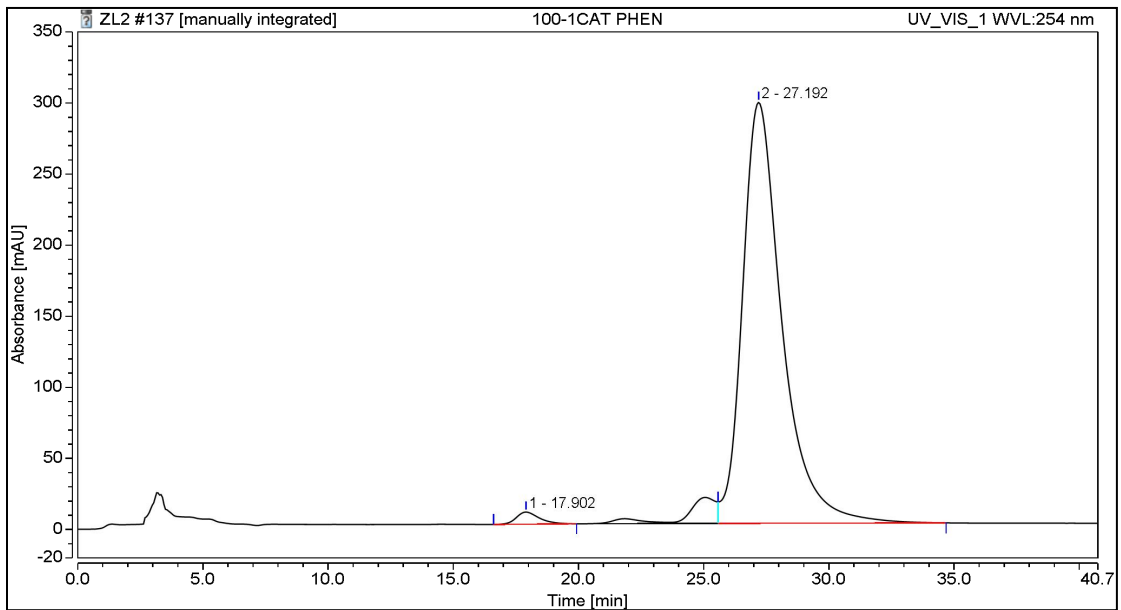

| Integration Results |           |                       |                 |                |                    |                      |
|---------------------|-----------|-----------------------|-----------------|----------------|--------------------|----------------------|
| No.                 | Peak Name | Retention Time<br>min | Area<br>mAU*min | Height<br>mAU  | Relative Area<br>% | Relative Height<br>% |
| 1                   |           | 17.902                | 9.161           | 8.575          | 1.67               | 2.81                 |
| 2                   |           | 27.192                | 540.702         | 296.135        | 98.33              | 97.19                |
| <b>Total:</b>       |           |                       | <b>549.863</b>  | <b>304.709</b> | <b>100.00</b>      | <b>100.00</b>        |

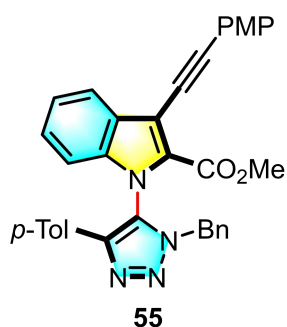

White solid, 43.6 mg, 79% yield, 97:2 er. [Chiral HPLC analysis of the product: Phenomenex 00G-4457-E0 250X4.6 mm 5u column; *n*-hexane/2-propanol = 70/30, flow rate = 1.0 mL/min,  $\lambda$  = 254 nm, *t* (major) = 24.18 min, *t* (minor) = 14.63 min].  $[\alpha]_D^{26} = -12.5^\circ$  (*c* = 0.7, CHCl<sub>3</sub>). **<sup>1</sup>H NMR (500 MHz, CDCl<sub>3</sub>)**  $\delta$  7.92 (d, *J* = 8.0 Hz, 1H), 7.61 (d, *J* = 8.8 Hz, 2H), 7.26 (d, *J* = 15.0 Hz, 1H), 7.21 (d, *J* = 8.2 Hz, 2H), 7.15-7.08 (m, 2H), 7.06 (t, *J* = 7.3 Hz, 2H), 6.99-6.91 (m, 6H), 6.49 (d, *J* = 8.4 Hz, 1H), 5.34 (d, *J* = 14.8 Hz, 1H), 5.18 (d, *J* = 14.8 Hz, 1H), 3.87 (s, 3H), 3.69 (s, 3H), 2.23 (s, 3H). **<sup>13</sup>C NMR (126 MHz, CDCl<sub>3</sub>)**  $\delta$  160.2, 142.6, 138.4, 138.1, 133.4, 129.6, 128.7, 128.5, 128.4, 128.3, 128.1, 127.8, 126.5, 125.5, 123.1, 122.0, 115.5, 114.4, 111.1, 110.3, 98.4, 80.2, 55.5, 52.6, 52.2, 21.3. **HRMS (ESI, *m/z*)** Calcd for C<sub>35</sub>H<sub>29</sub>N<sub>4</sub>O<sub>3</sub> (M+H)<sup>+</sup>: 553.2234; Found: 553.2231.

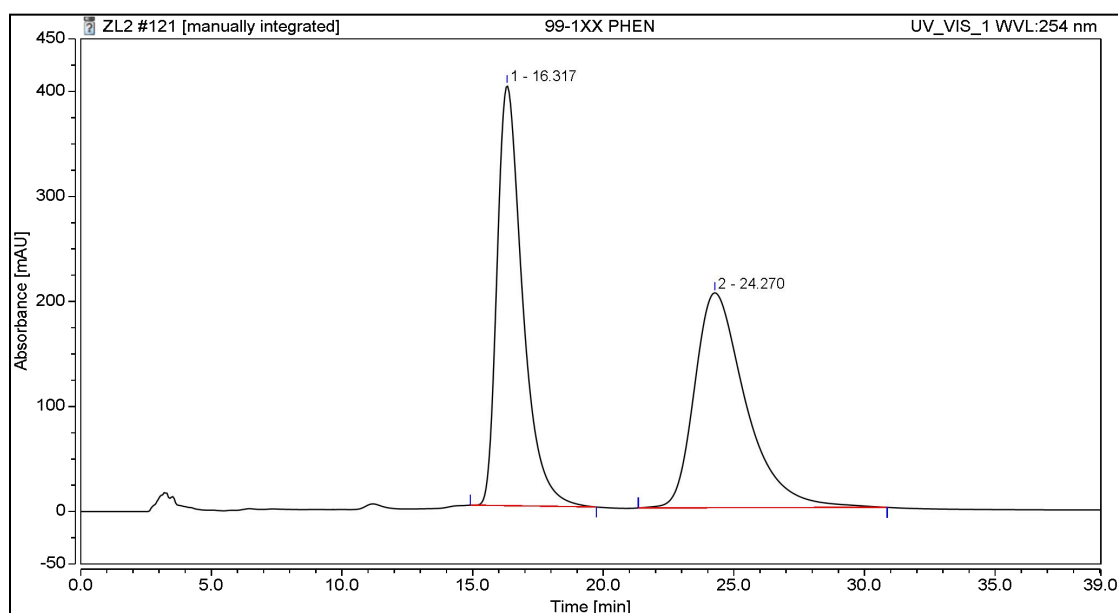

| Integration Results |           |                       |                 |                |                    |                      |
|---------------------|-----------|-----------------------|-----------------|----------------|--------------------|----------------------|
| No.                 | Peak Name | Retention Time<br>min | Area<br>mAU*min | Height<br>mAU  | Relative Area<br>% | Relative Height<br>% |
| 1                   |           | 16.317                | 453.161         | 399.997        | 49.35              | 66.15                |
| 2                   |           | 24.270                | 465.156         | 204.693        | 50.65              | 33.85                |
| <b>Total:</b>       |           |                       | <b>918.317</b>  | <b>604.690</b> | <b>100.00</b>      | <b>100.00</b>        |

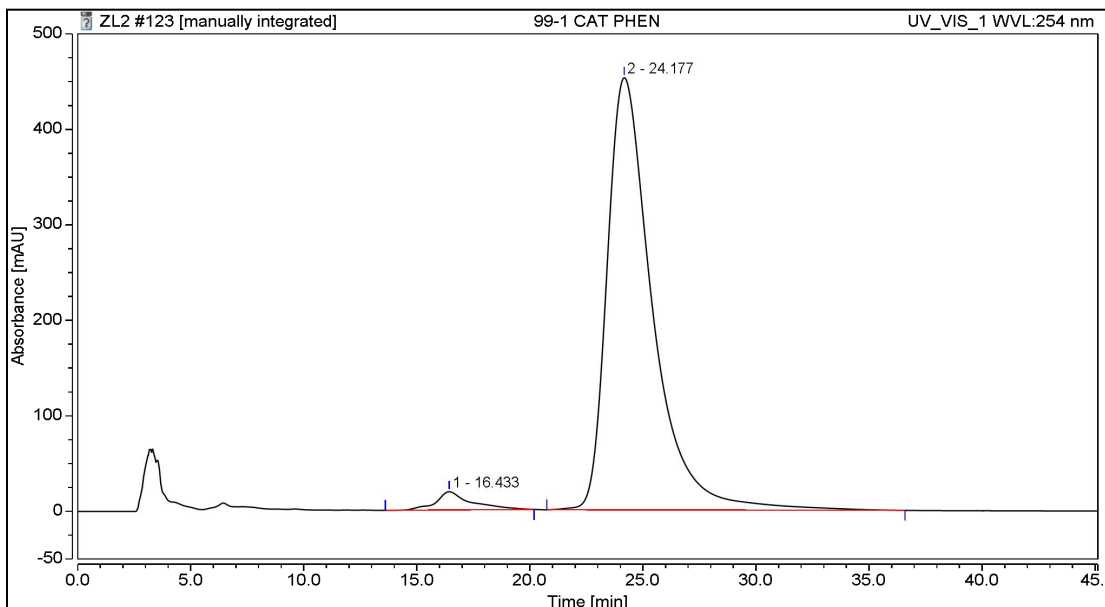

| Integration Results |           |                       |                 |                |                    |                      |
|---------------------|-----------|-----------------------|-----------------|----------------|--------------------|----------------------|
| No.                 | Peak Name | Retention Time<br>min | Area<br>mAU*min | Height<br>mAU  | Relative Area<br>% | Relative Height<br>% |
| 1                   |           | 16.433                | 34.778          | 19.156         | 3.19               | 4.06                 |
| 2                   |           | 24.177                | 1054.594        | 452.821        | 96.81              | 95.94                |
| <b>Total:</b>       |           |                       | <b>1089.372</b> | <b>471.977</b> | <b>100.00</b>      | <b>100.00</b>        |

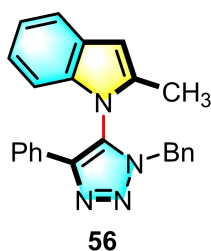

White solid, 35.0 mg, 96% yield, 81:19 er. [Chiral HPLC analysis of the product: Phenomenex 00G-4457-E0 250X4.6 mm 5u column; *n*-hexane/2-propanol = 70/30, flow rate = 1.0 mL/min,  $\lambda$  = 254 nm, *t* (major) = 9.30 min, *t* (minor) = 19.72 min].  $[\alpha]_D^{26} = +22.1^\circ$  (*c* = 1.4, CHCl<sub>3</sub>). **<sup>1</sup>H NMR (500 MHz, CDCl<sub>3</sub>)**  $\delta$  7.63 (d, *J* = 7.9 Hz, 1H), 7.39-7.33 (m, 2H), 7.25-7.15 (m, 7H), 7.11 (t, *J* = 7.6 Hz, 1H), 6.91 (d, *J* = 7.3 Hz, 2H), 6.82 (d, *J* = 8.1 Hz, 1H), 6.44 (s, 1H), 5.50 (d, *J* = 14.5 Hz, 1H), 5.00 (d, *J* = 14.5 Hz, 1H), 1.55 (s, 3H). **<sup>13</sup>C NMR (126 MHz, CDCl<sub>3</sub>)**  $\delta$  141.6, 135.9, 132.5, 128.3, 128.2, 127.8,

127.7, 127.7, 127.5, 127.3, 127.0, 124.2, 121.5, 120.5, 119.4, 108.5, 102.9, 51.2, 10.8.

HRMS (ESI, m/z) Calcd for C<sub>24</sub>H<sub>21</sub>N<sub>4</sub> (M+H)<sup>+</sup>: 365.1761; Found: 365.1764.

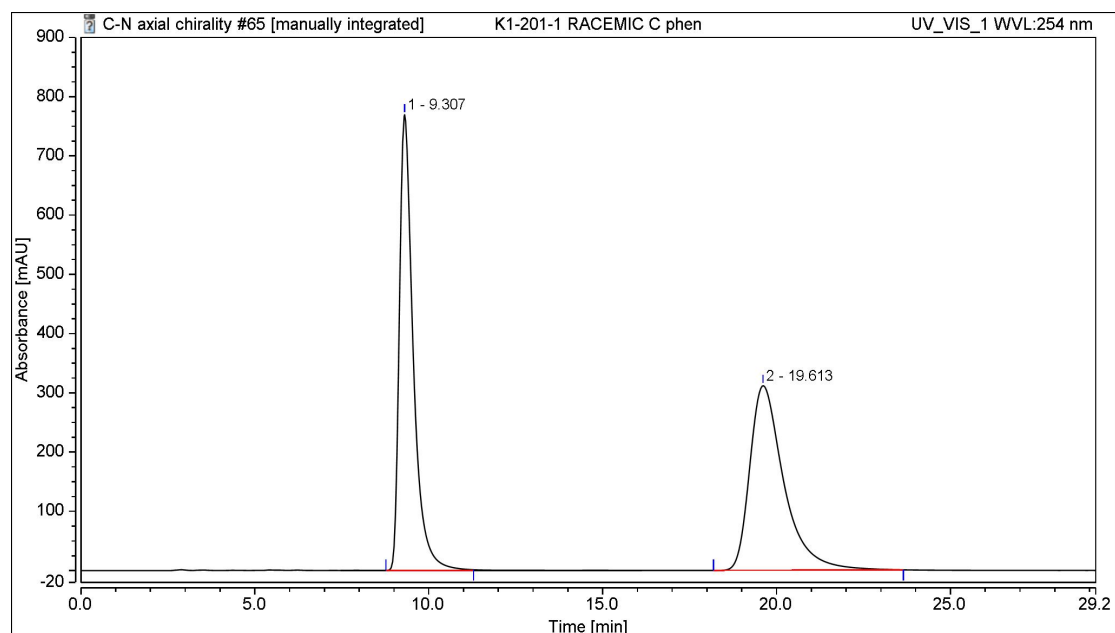

| Integration Results |           |                    |                |                 |                 |                   |
|---------------------|-----------|--------------------|----------------|-----------------|-----------------|-------------------|
| No.                 | Peak Name | Retention Time min | Area mAU*min   | Height mAU      | Relative Area % | Relative Height % |
| 1                   |           | 9.307              | 355.917        | 769.392         | 50.17           | 71.17             |
| 2                   |           | 19.613             | 353.491        | 311.665         | 49.83           | 28.83             |
| <b>Total:</b>       |           |                    | <b>709.408</b> | <b>1081.057</b> | <b>100.00</b>   | <b>100.00</b>     |

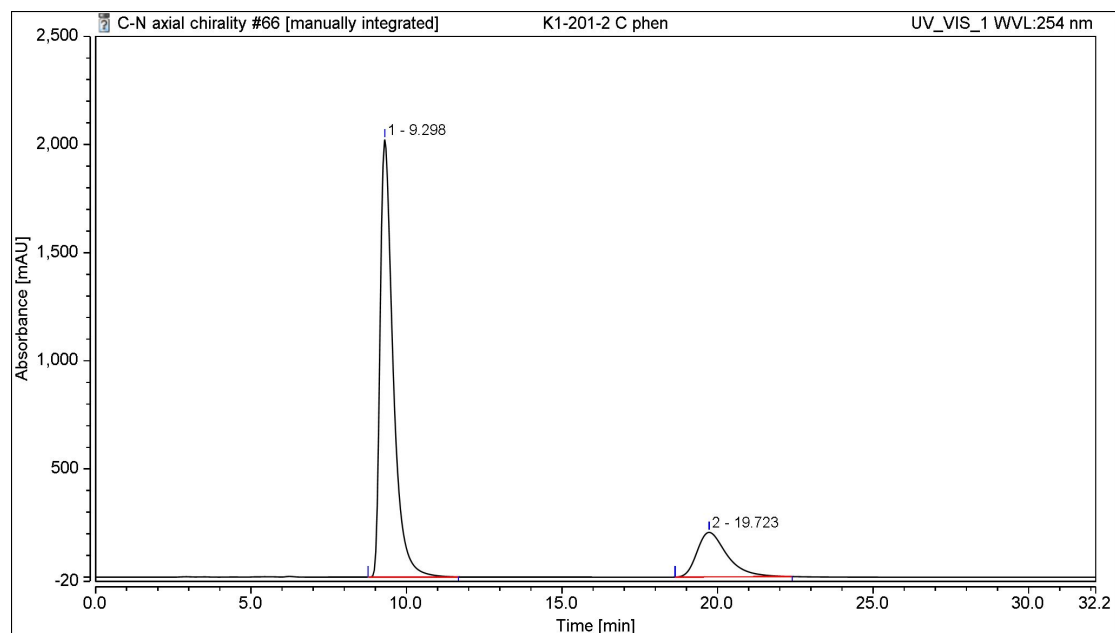

| Integration Results |           |                    |                 |                 |                 |                   |
|---------------------|-----------|--------------------|-----------------|-----------------|-----------------|-------------------|
| No.                 | Peak Name | Retention Time min | Area mAU*min    | Height mAU      | Relative Area % | Relative Height % |
| 1                   |           | 9.298              | 982.056         | 2021.871        | 80.97           | 90.74             |
| 2                   |           | 19.723             | 230.760         | 206.261         | 19.03           | 9.26              |
| <b>Total:</b>       |           |                    | <b>1212.816</b> | <b>2228.132</b> | <b>100.00</b>   | <b>100.00</b>     |

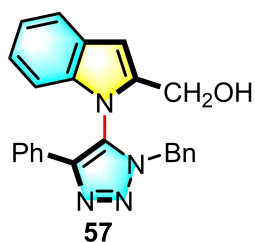

White solid, 35.7 mg, 94% yield, 61:39 er. [Chiral HPLC analysis of the product: Daicel Chiralpak AS-H 250X4.6 mm 5u column; *n*-hexane/2-propanol = 90/10, flow rate = 1.0 mL/min,  $\lambda = 254$  nm,  $t$  (major) = 24.84 min,  $t$  (minor) = 37.00 min].  $[\alpha]_D^{26} = -46.9^\circ$  ( $c = 1.1$ ,  $\text{CHCl}_3$ ).  $^1\text{H NMR}$  (500 MHz,  $\text{CDCl}_3$ )  $\delta$  7.67 (d,  $J = 7.5$  Hz, 1H), 7.28 (s, 2H), 7.24-6.97 (m, 8H), 6.87 (s, 2H), 6.76 (s, 1H), 6.56 (t,  $J = 6.8$  Hz, 1H), 5.36 (d,  $J = 14.5$  Hz, 1H), 5.15 (d,  $J = 14.5$  Hz, 1H), 4.40-4.17 (m, 2H), 2.67-2.42 (m, 1H).  $^{13}\text{C NMR}$  (126 MHz,  $\text{CDCl}_3$ )  $\delta$  142.7, 139.4, 137.9, 133.7, 129.1, 129.0, 128.8, 128.7, 128.7, 128.5, 128.0, 125.5, 123.8, 121.8, 121.4, 110.1, 105.8, 56.7, 52.5. HRMS (ESI,  $m/z$ ) Calcd for  $\text{C}_{24}\text{H}_{21}\text{N}_4\text{O}$  ( $\text{M}+\text{H}$ ) $^+$ : 381.1710; Found: 381.1708.

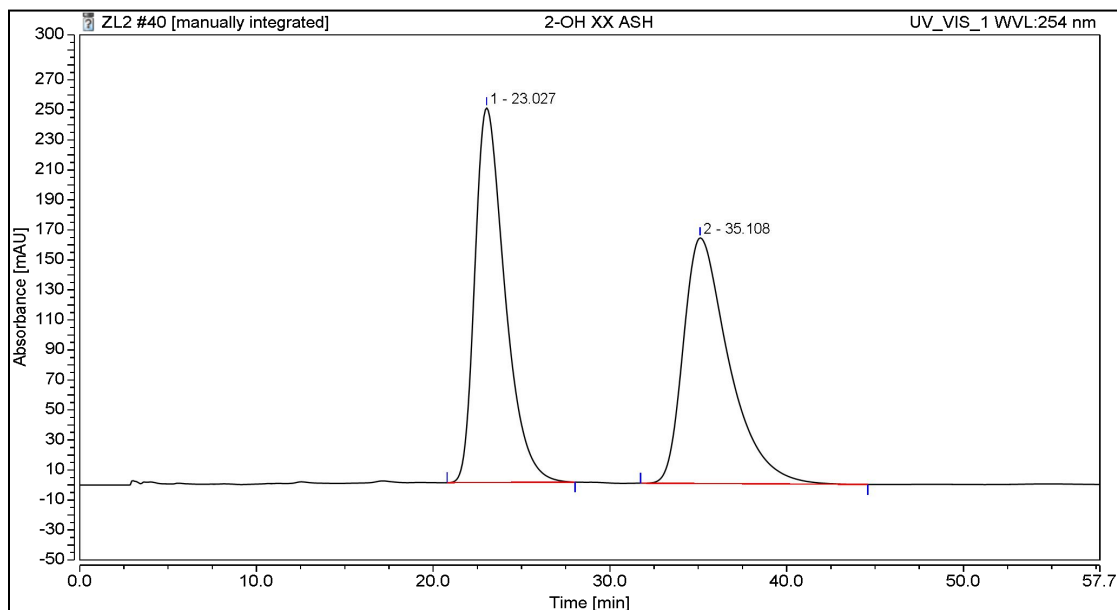

| Integration Results |           |                       |                 |                |                    |                      |
|---------------------|-----------|-----------------------|-----------------|----------------|--------------------|----------------------|
| No.                 | Peak Name | Retention Time<br>min | Area<br>mAU*min | Height<br>mAU  | Relative Area<br>% | Relative Height<br>% |
| 1                   |           | 23.027                | 491.458         | 249.733        | 50.05              | 60.40                |
| 2                   |           | 35.108                | 490.428         | 163.719        | 49.95              | 39.60                |
| <b>Total:</b>       |           |                       | <b>981.886</b>  | <b>413.452</b> | <b>100.00</b>      | <b>100.00</b>        |

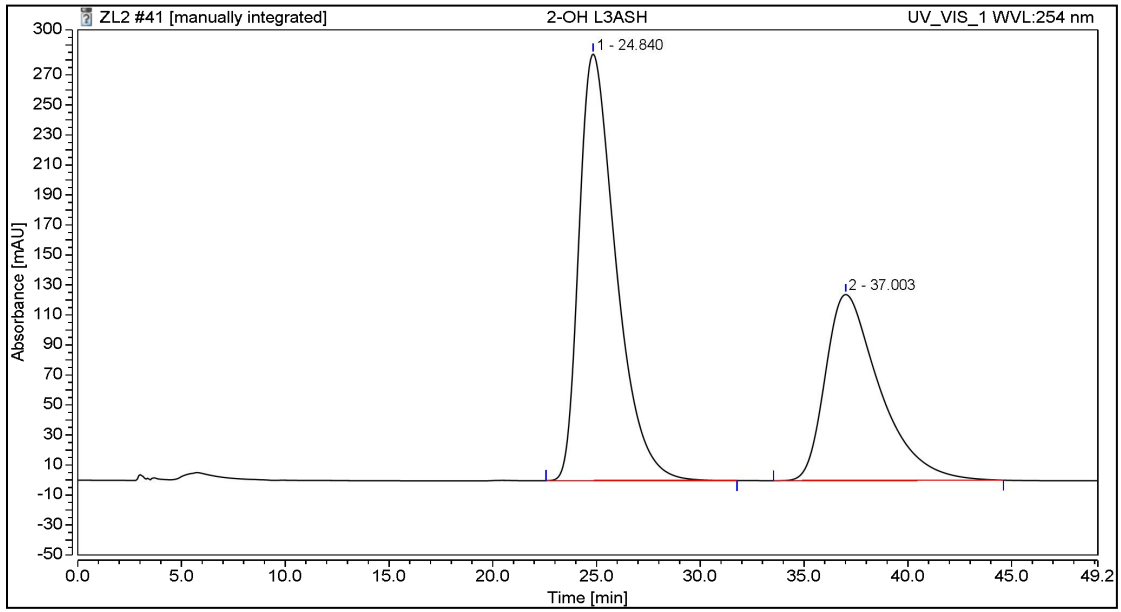

| Integration Results |           |                       |                 |                |                    |                      |
|---------------------|-----------|-----------------------|-----------------|----------------|--------------------|----------------------|
| No.                 | Peak Name | Retention Time<br>min | Area<br>mAU*min | Height<br>mAU  | Relative Area<br>% | Relative Height<br>% |
| 1                   |           | 24.840                | 587.316         | 284.366        | 60.94              | 69.64                |
| 2                   |           | 37.003                | 376.511         | 123.988        | 39.06              | 30.36                |
| <b>Total:</b>       |           |                       | <b>963.827</b>  | <b>408.354</b> | <b>100.00</b>      | <b>100.00</b>        |



## 9. NMR spectra

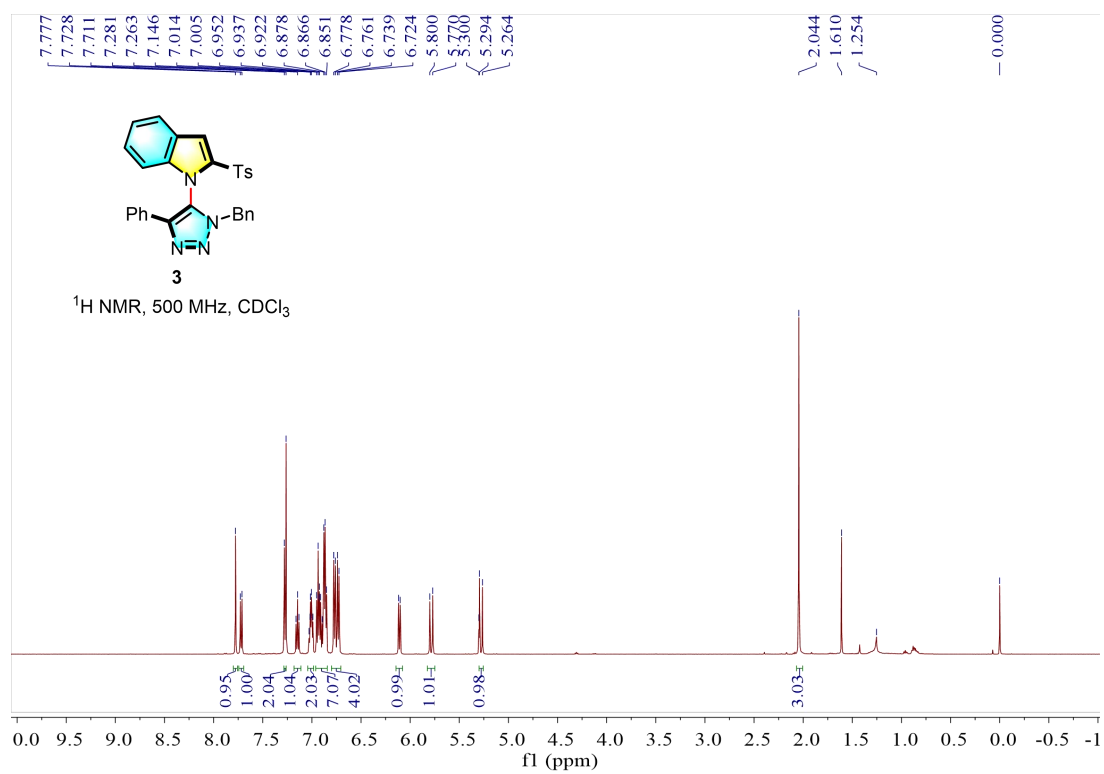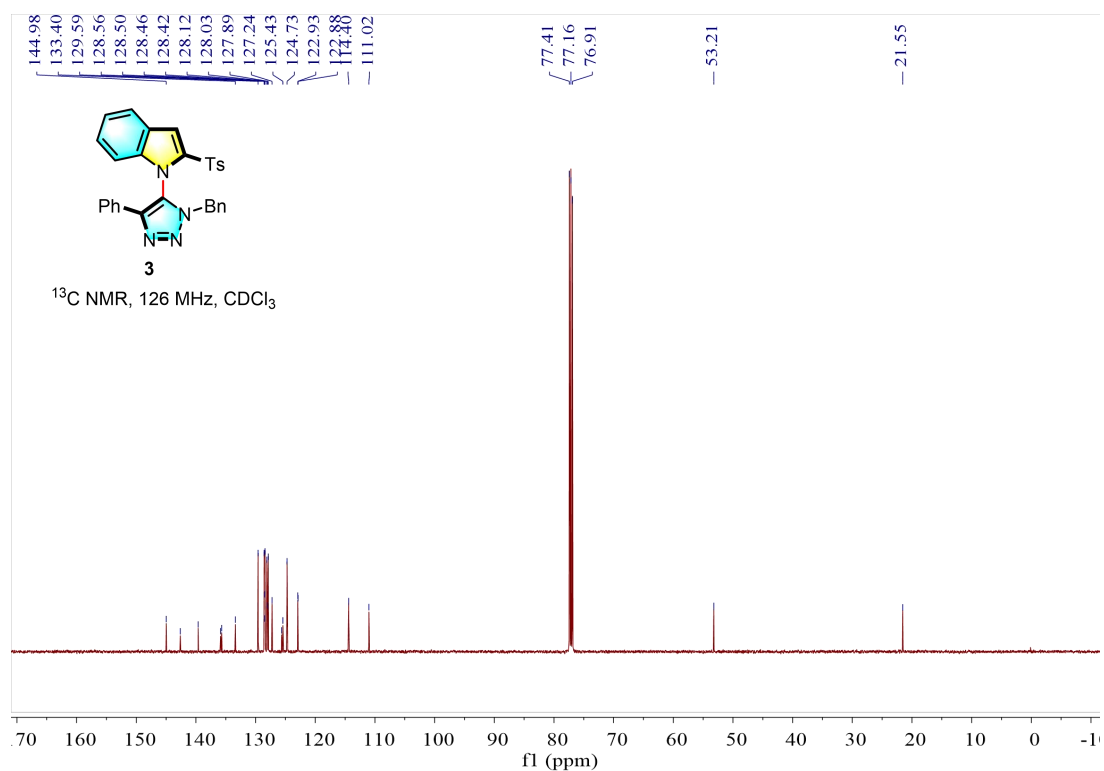

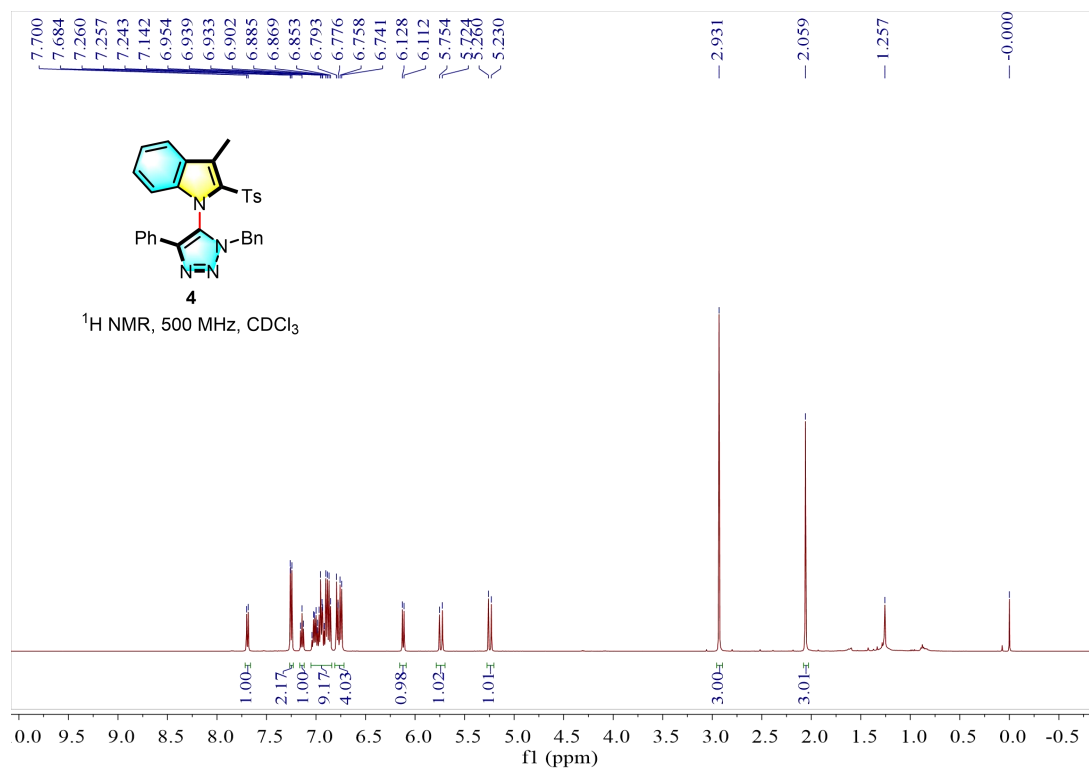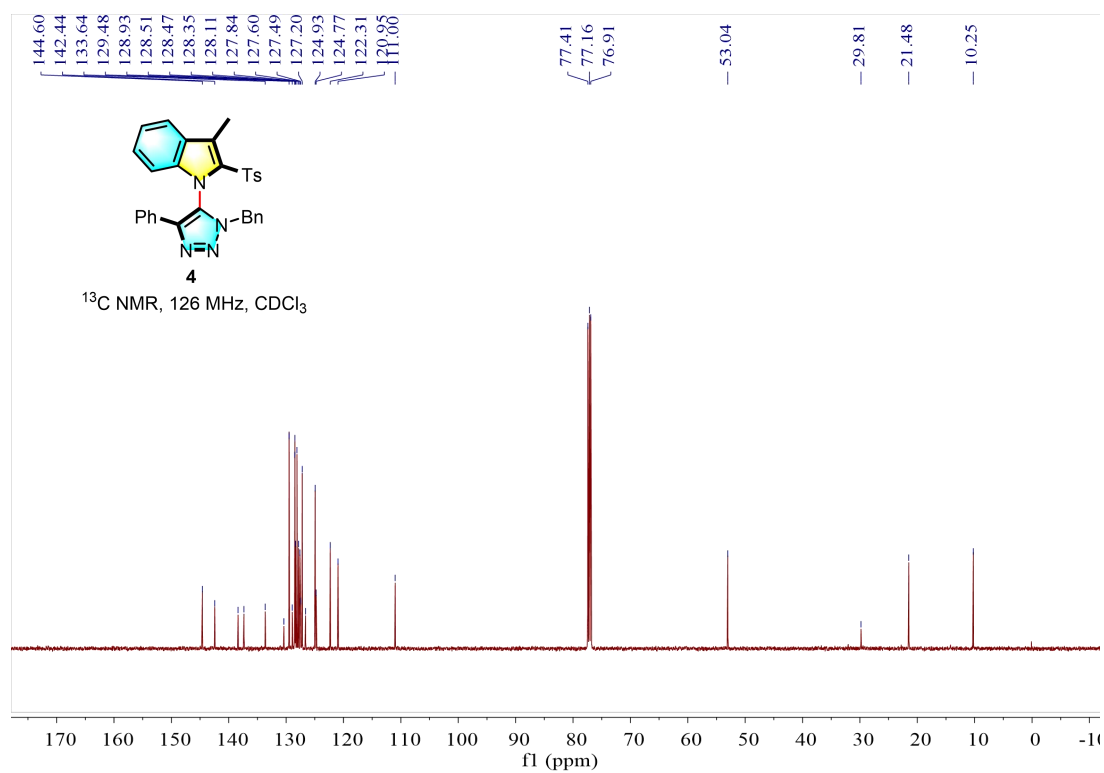

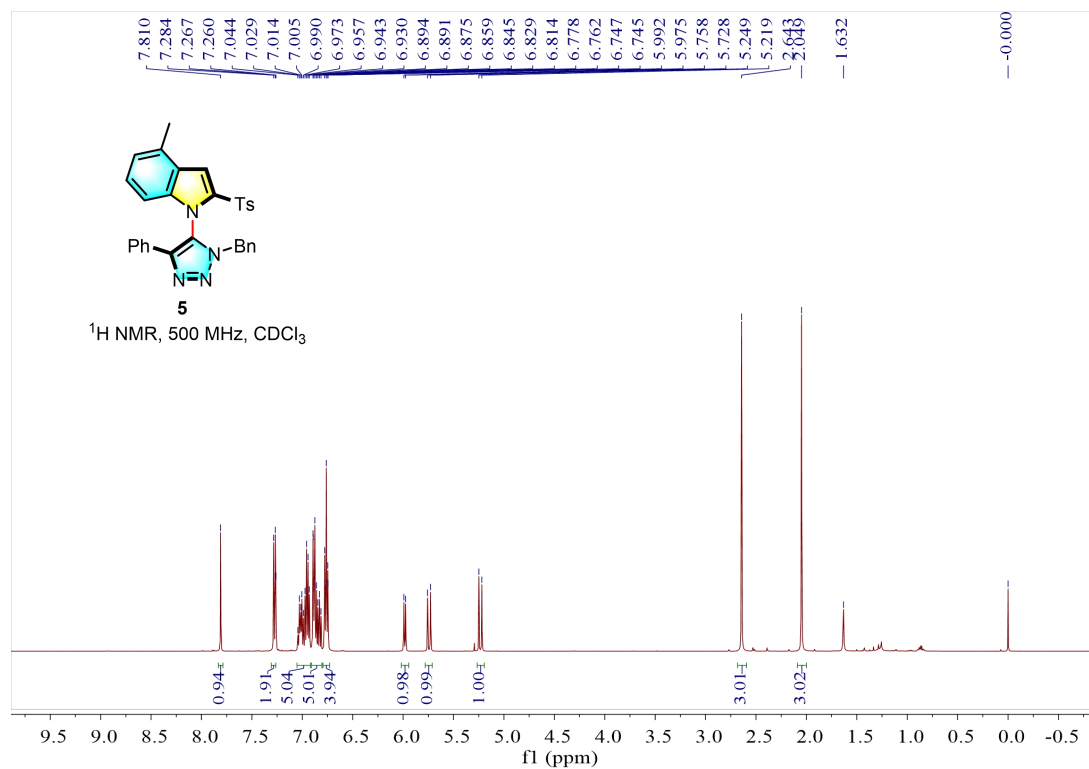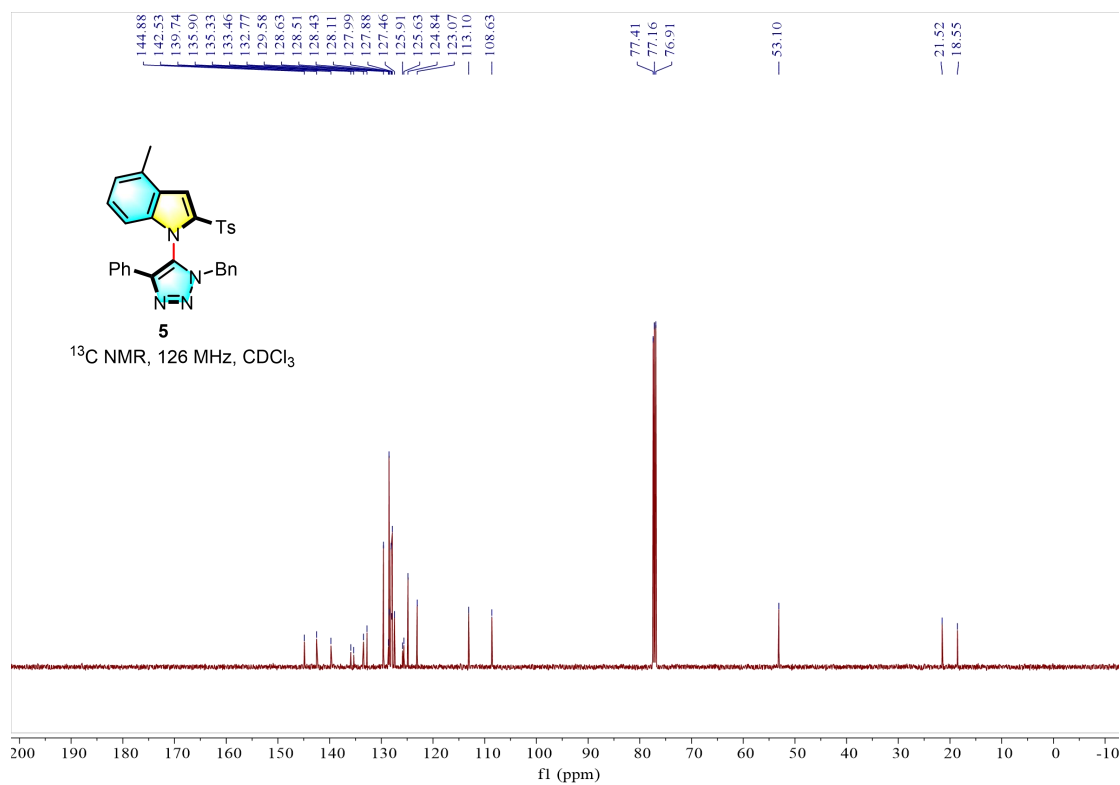

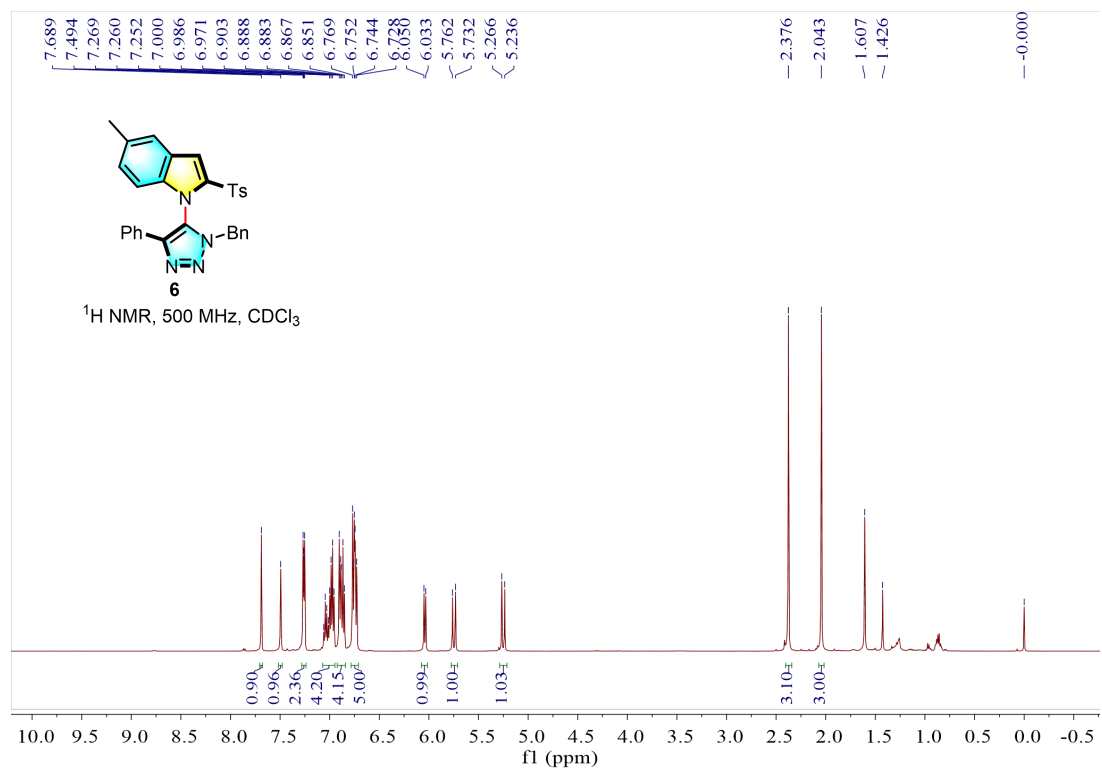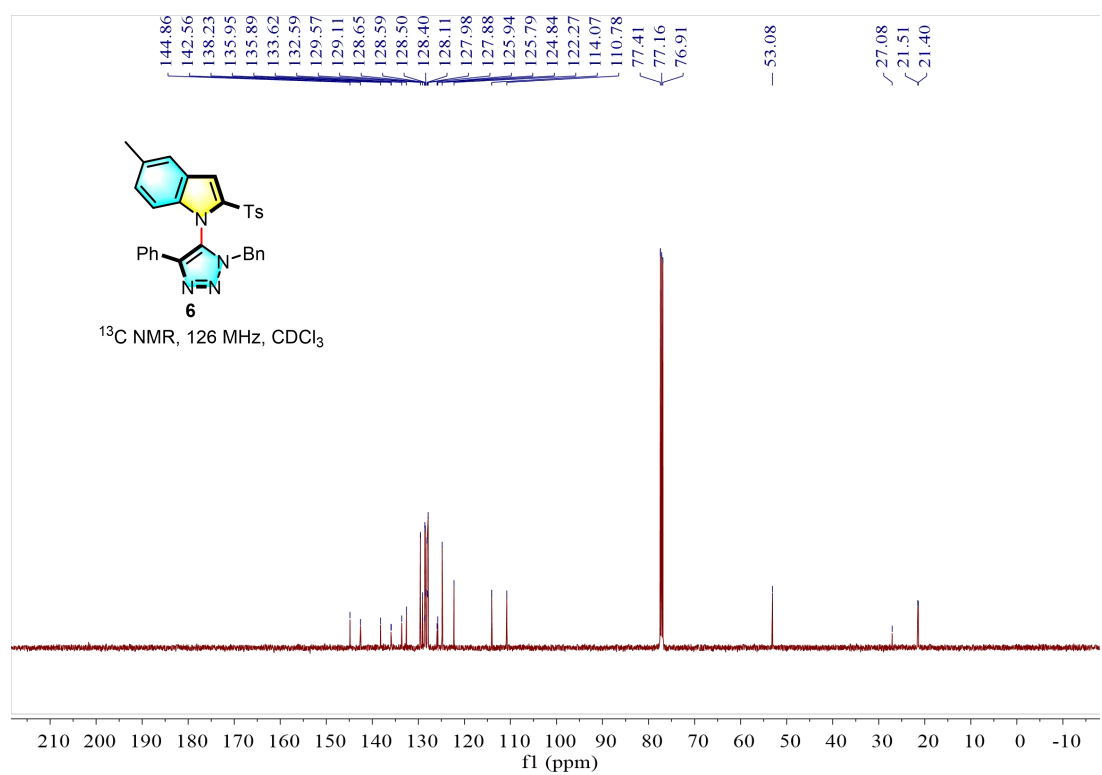

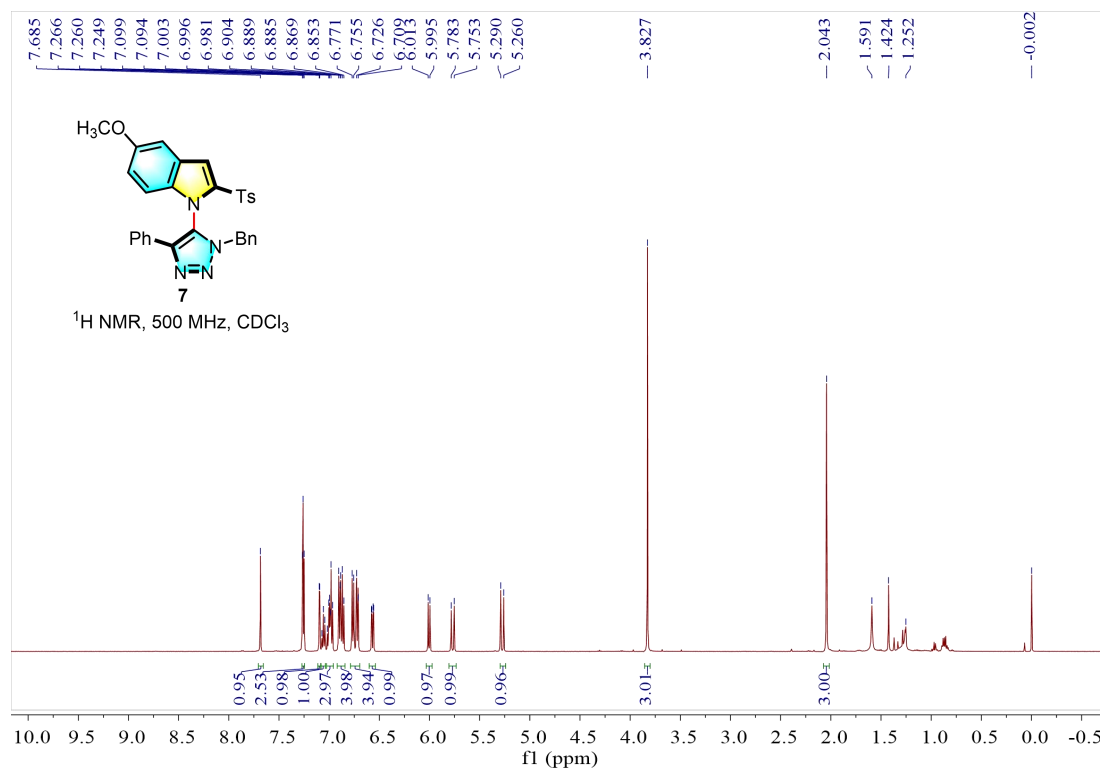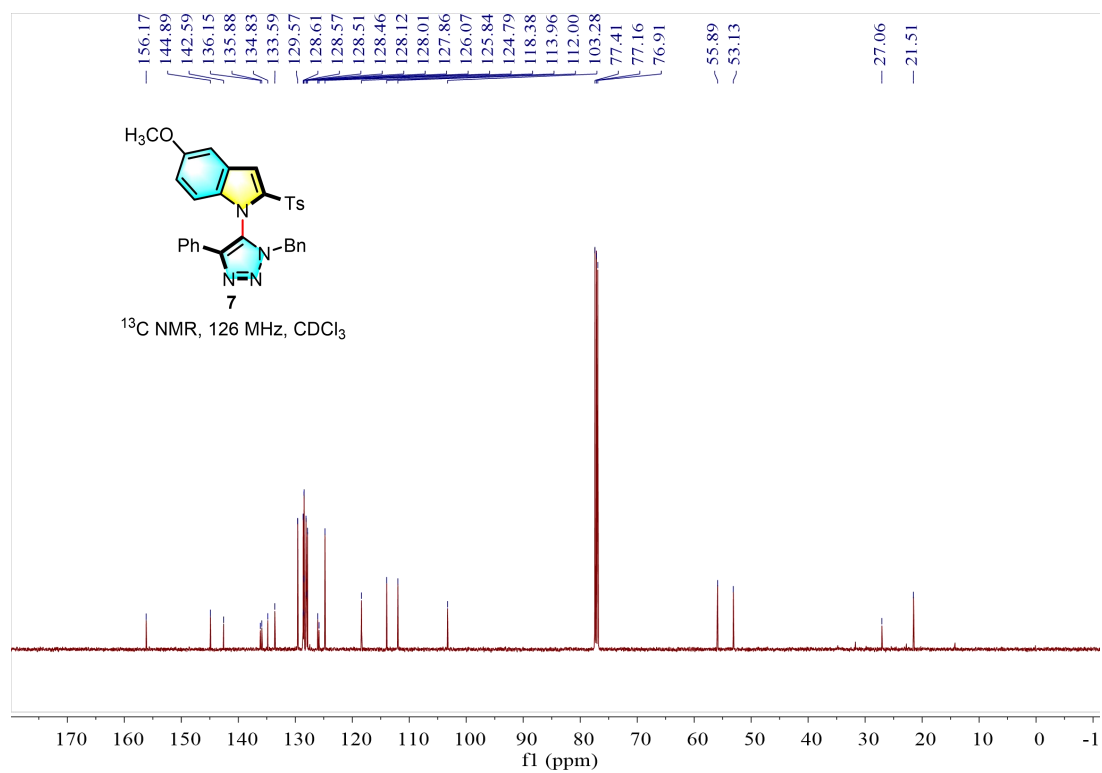

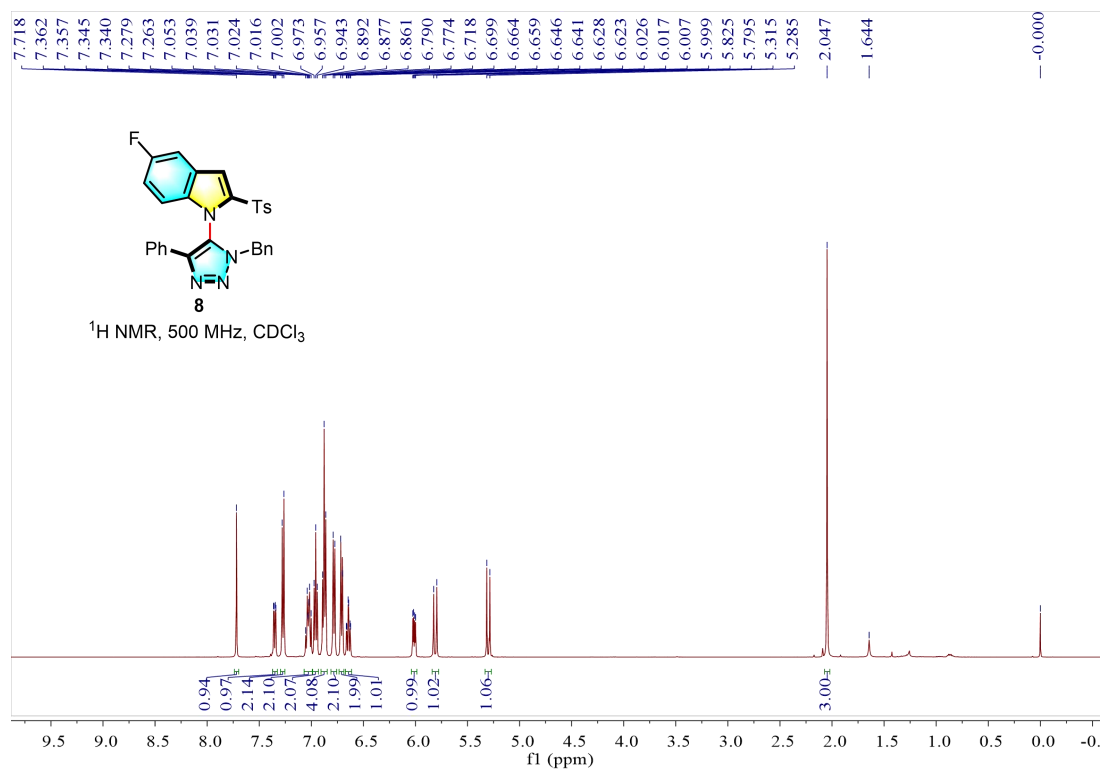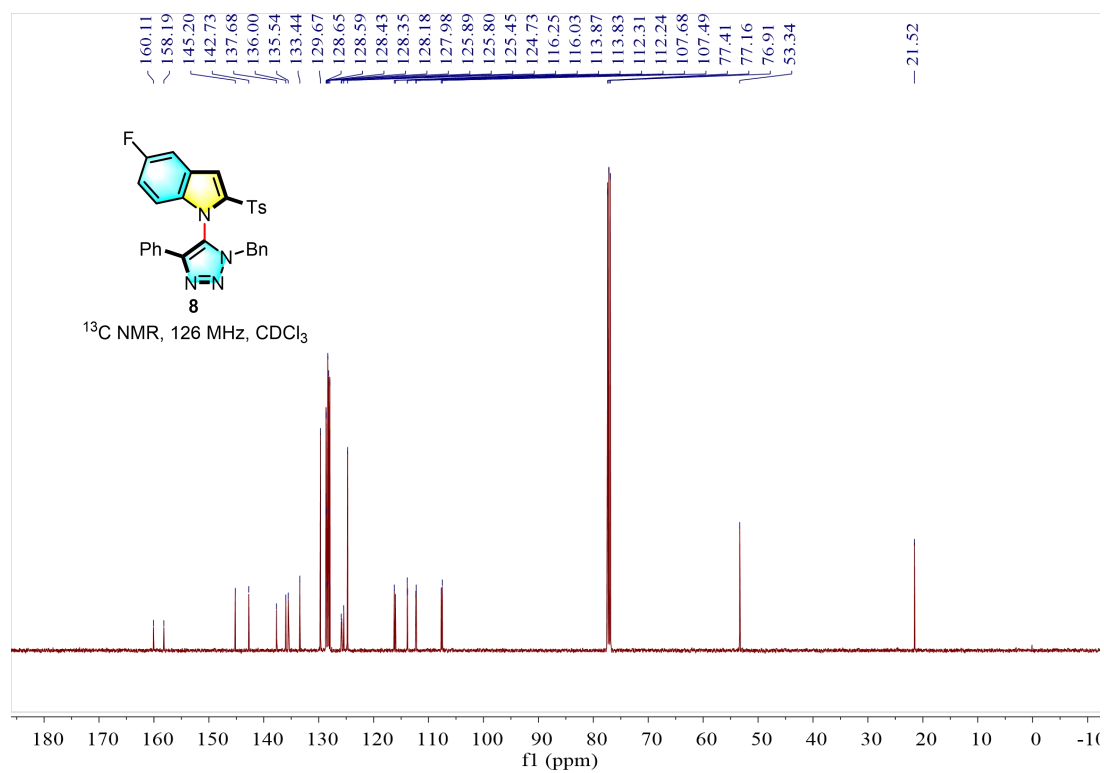

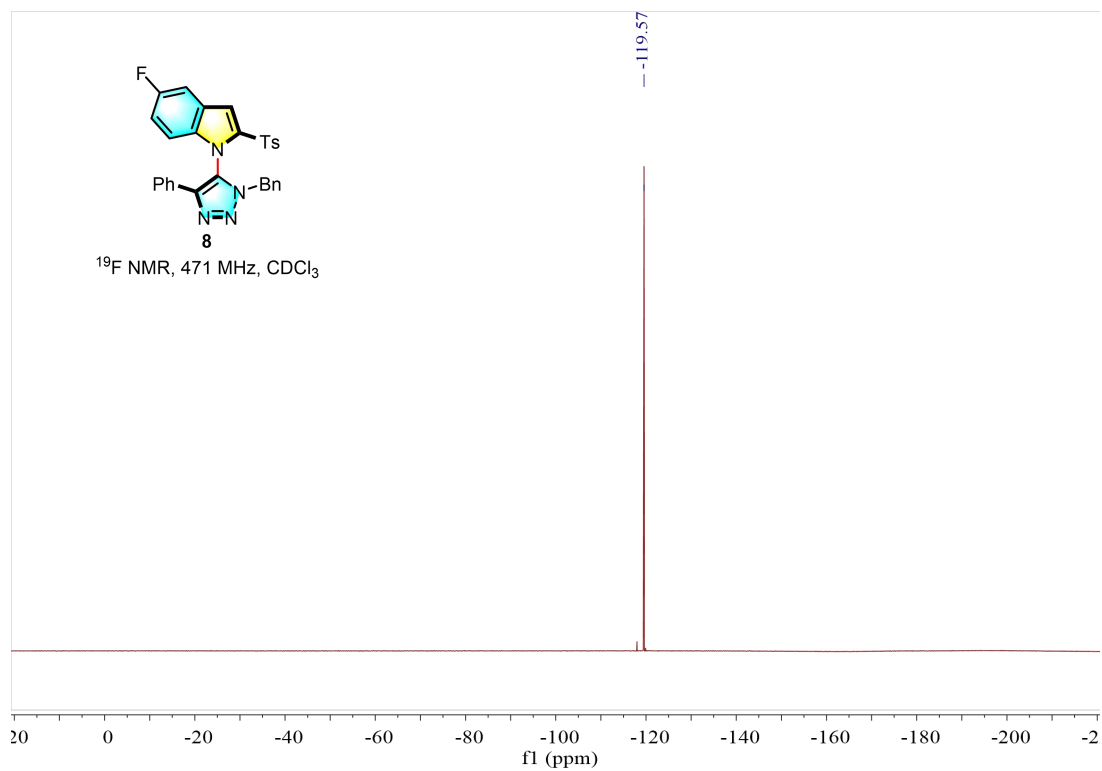

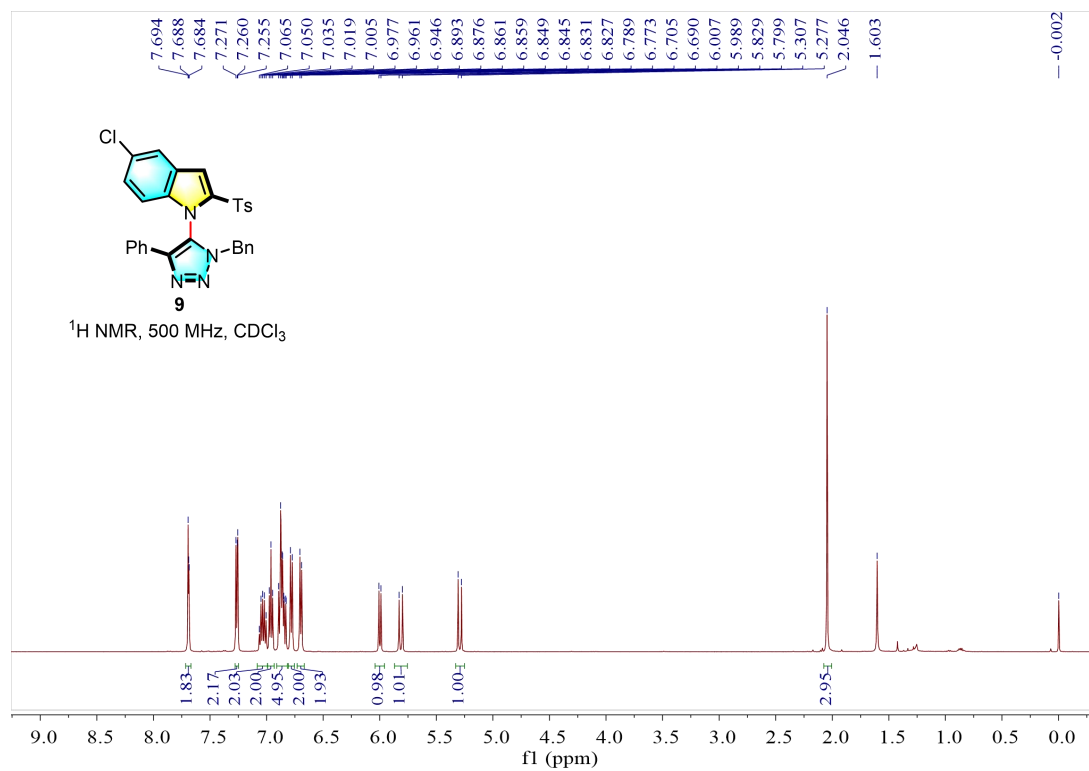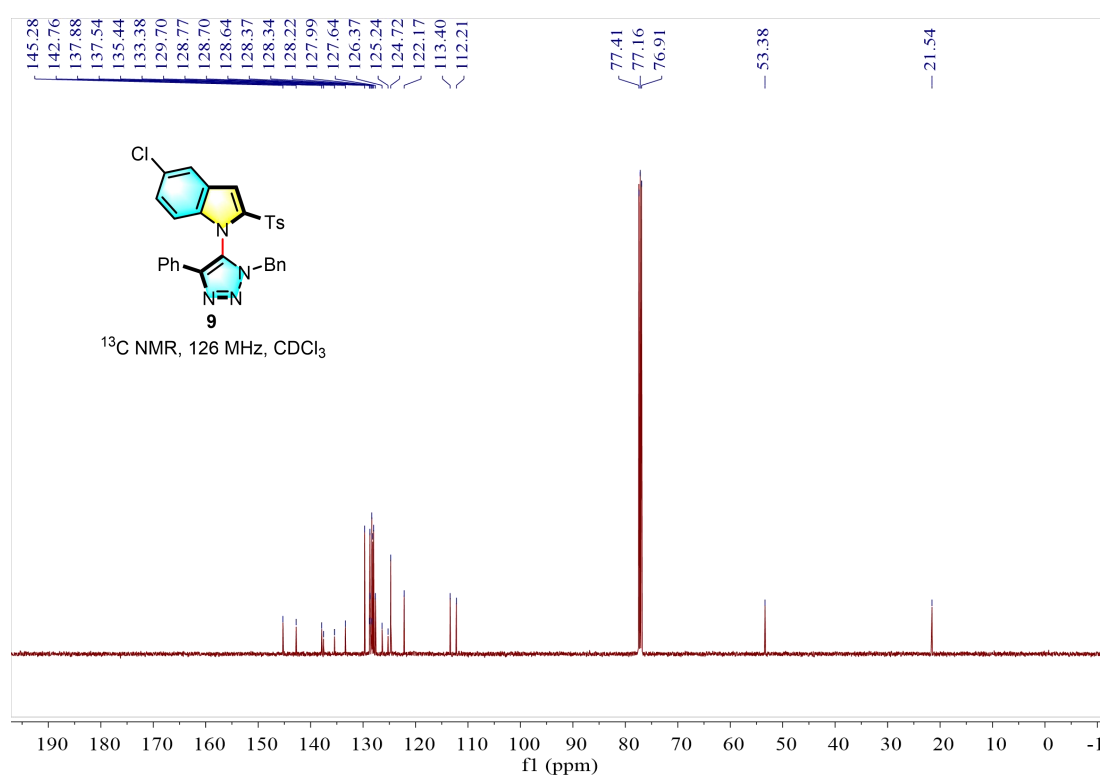



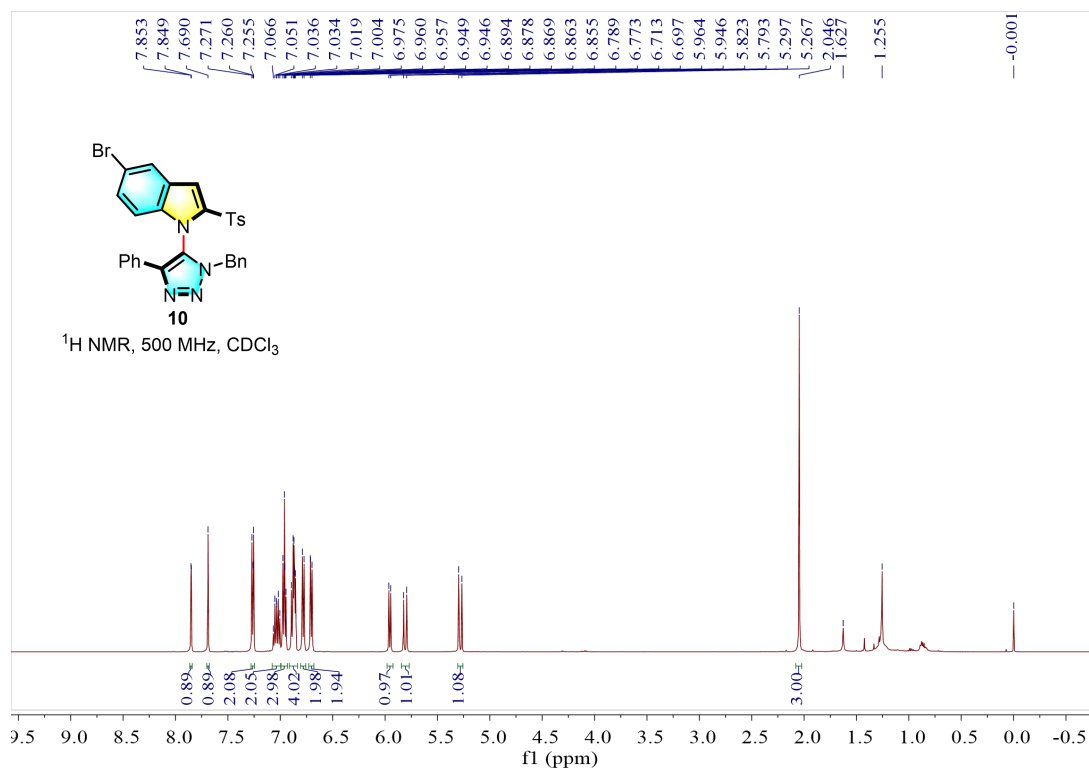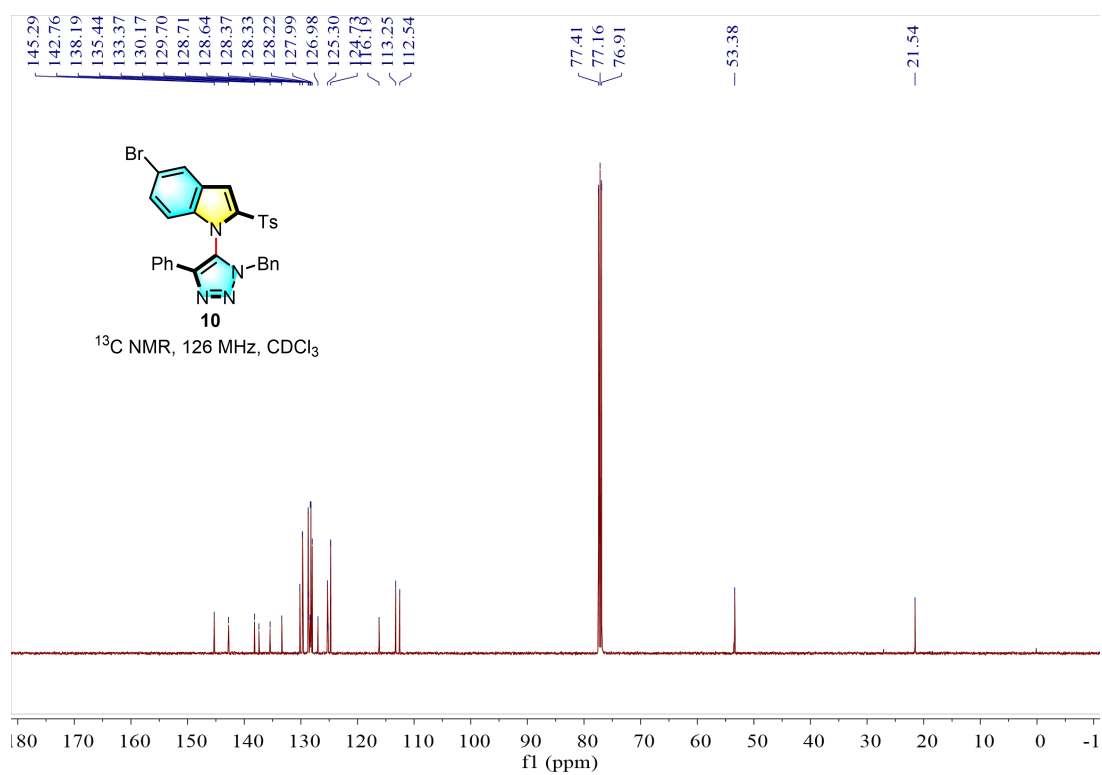

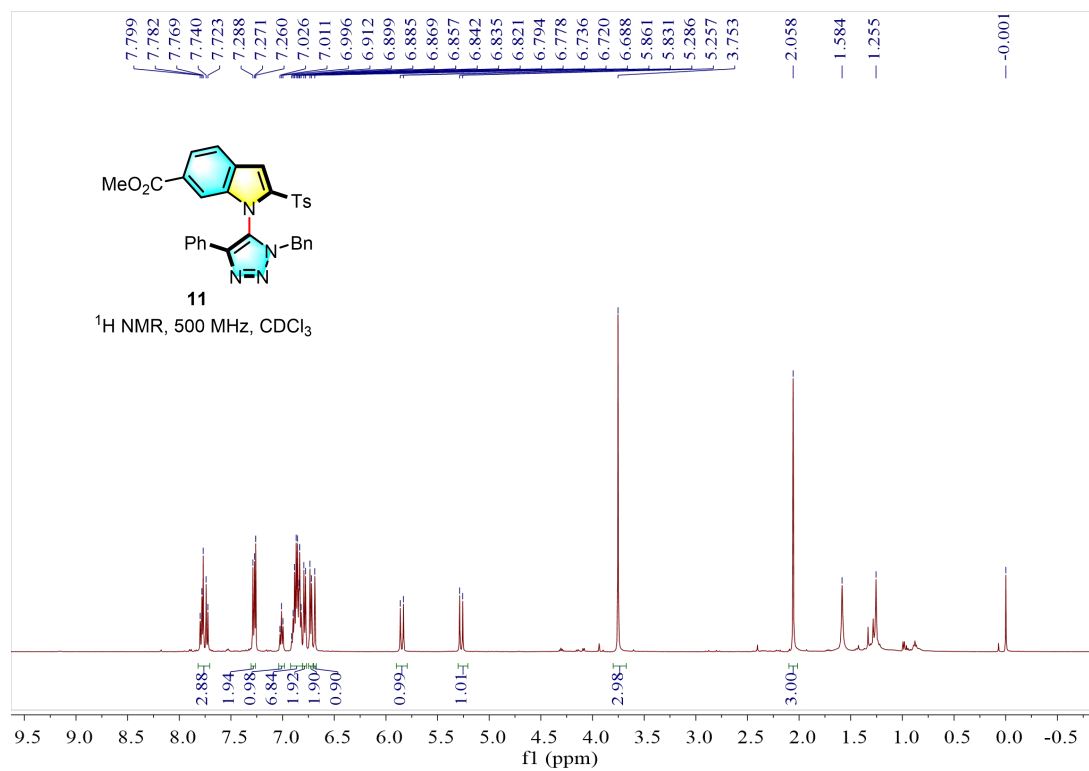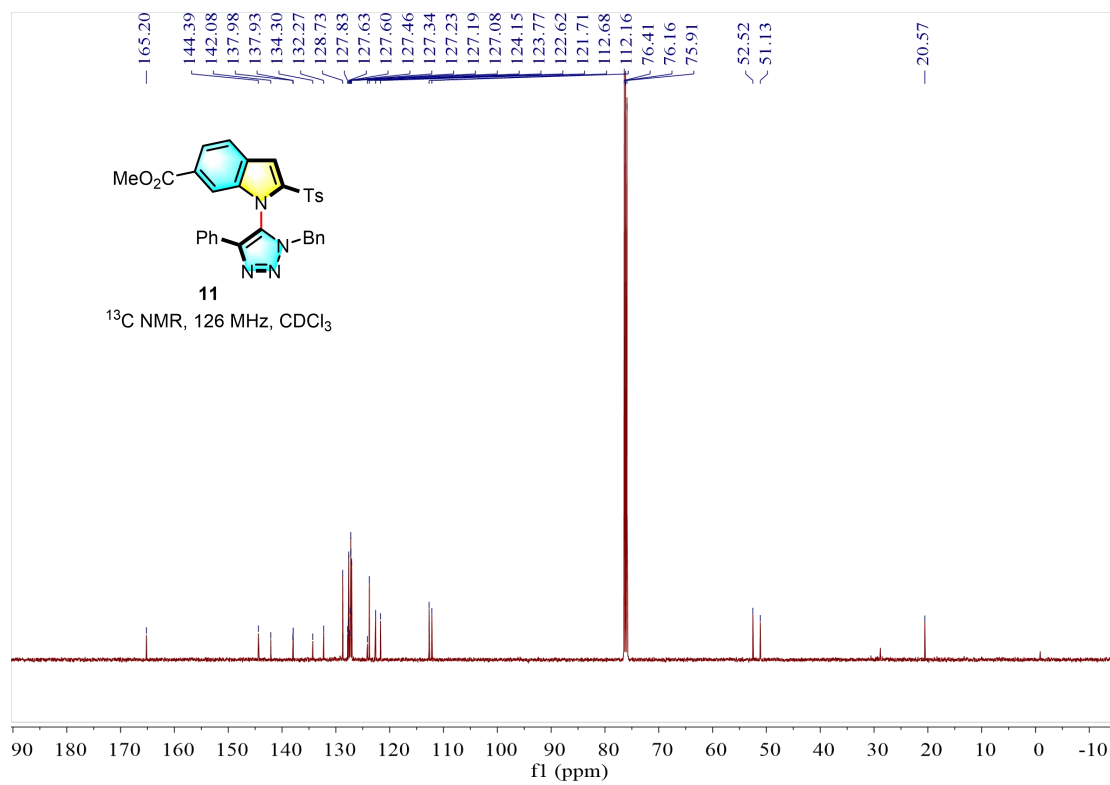

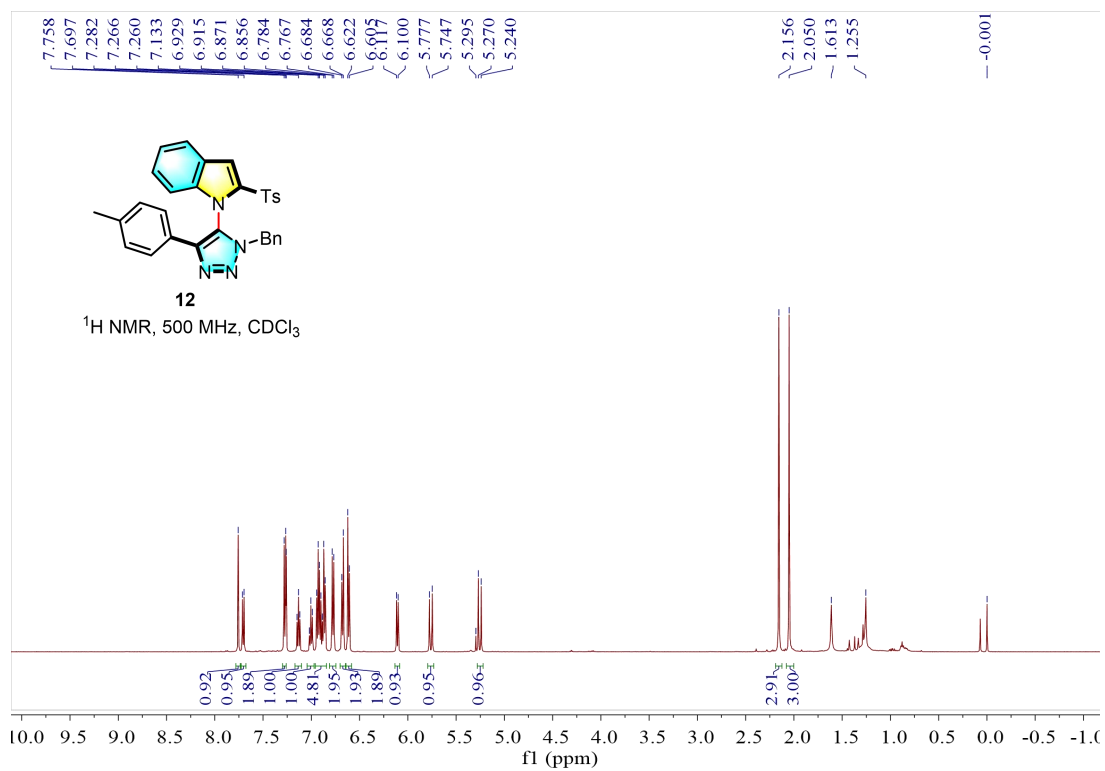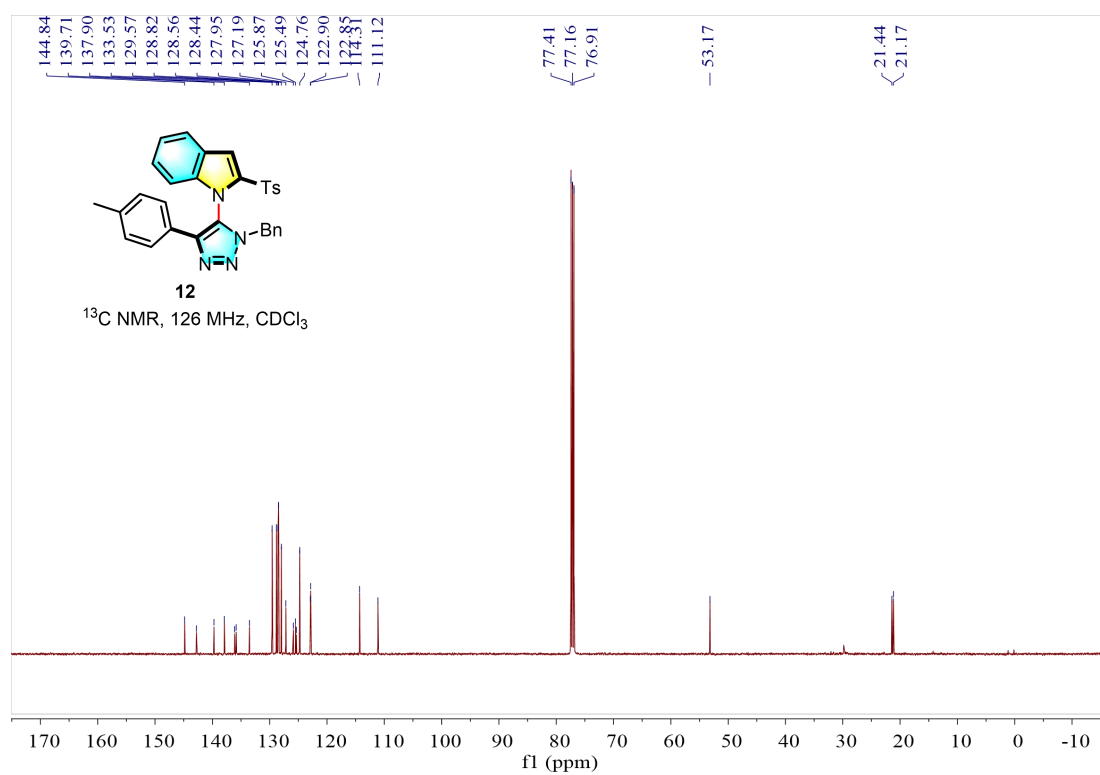

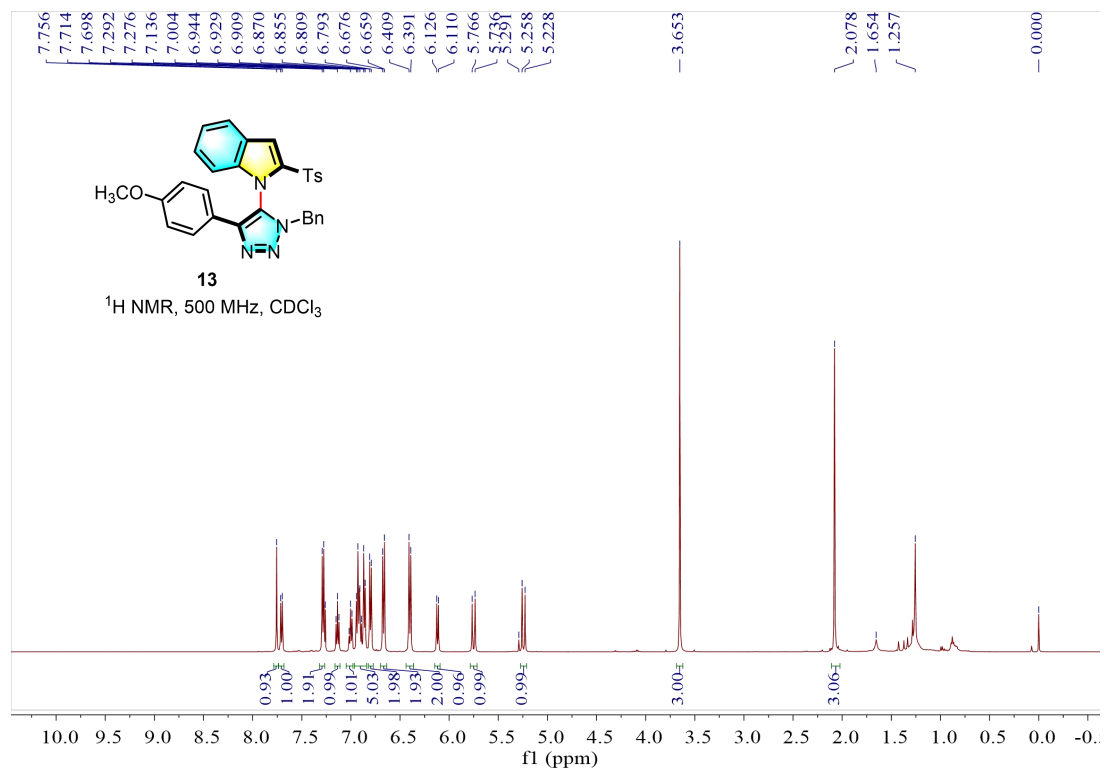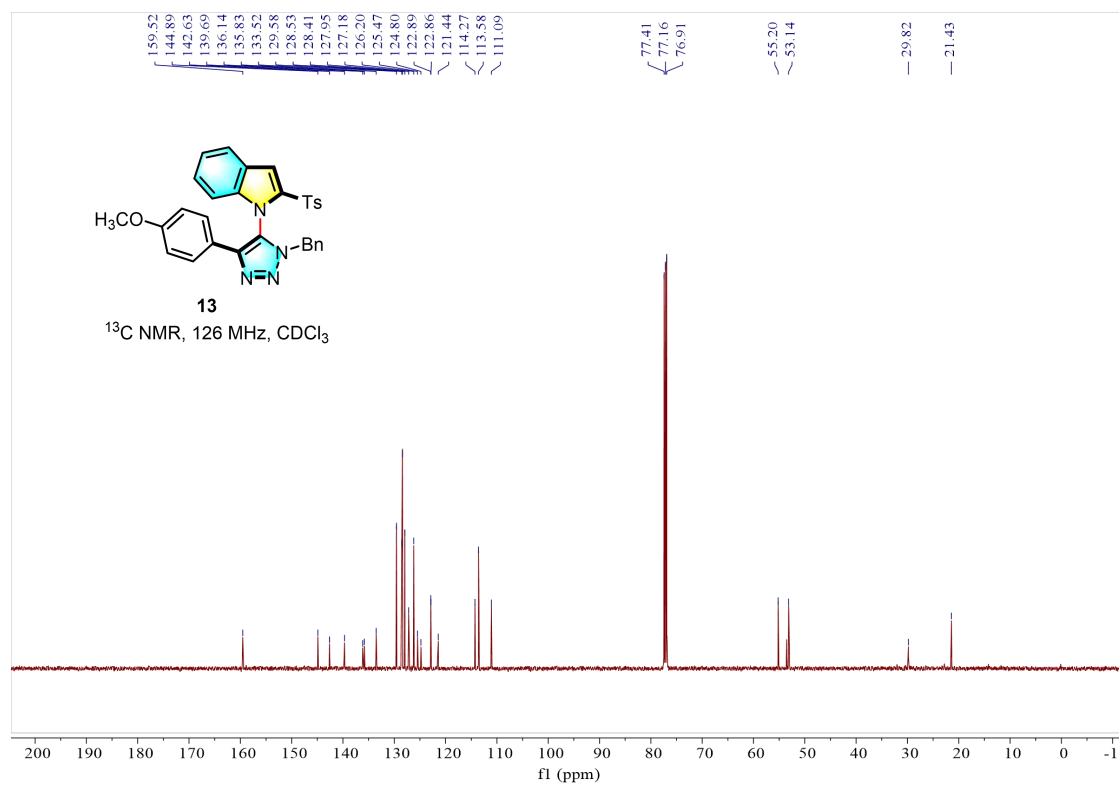

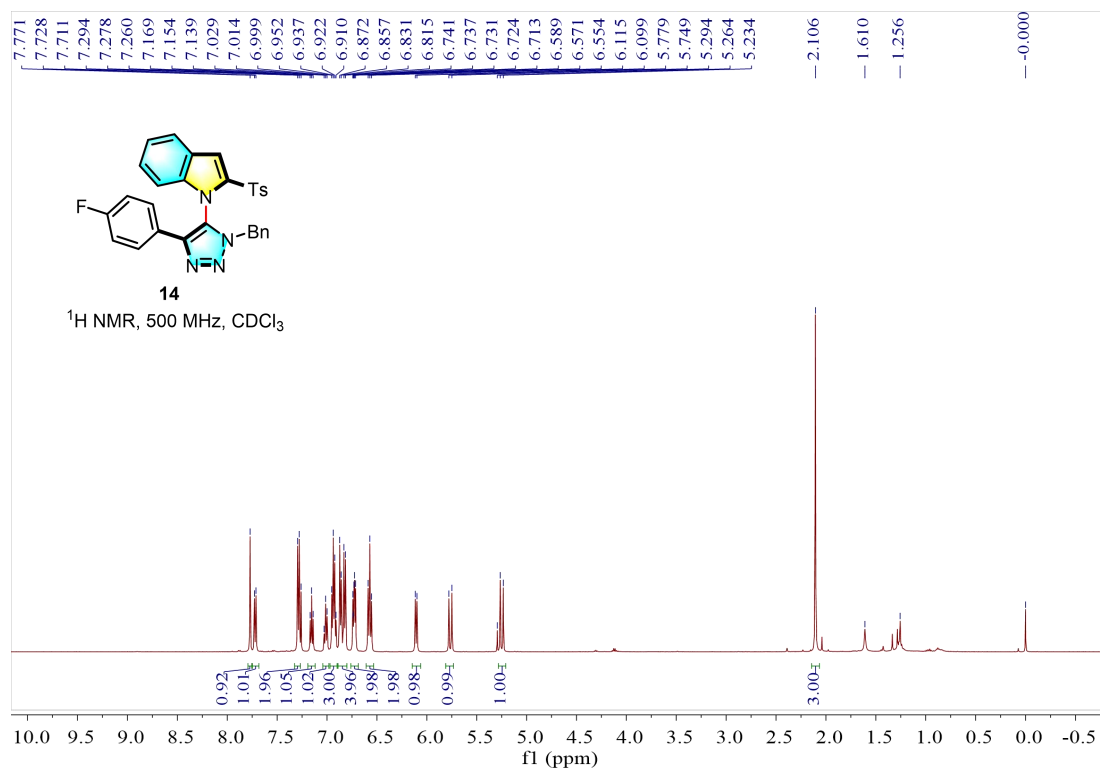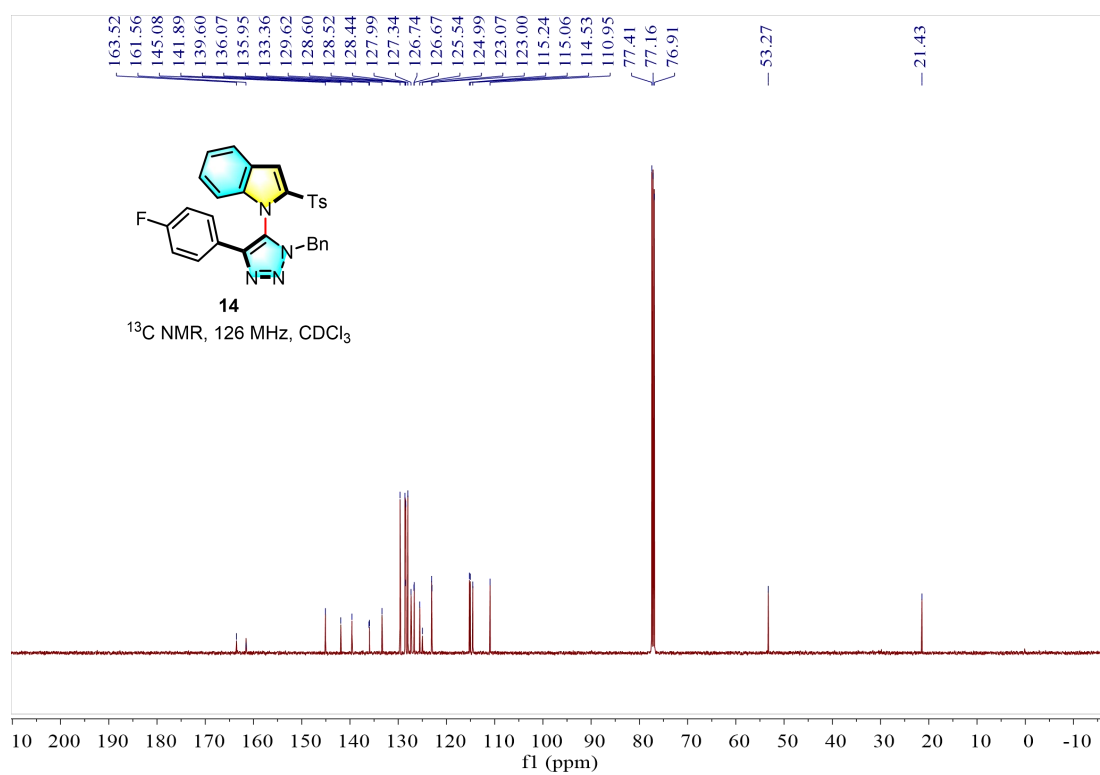

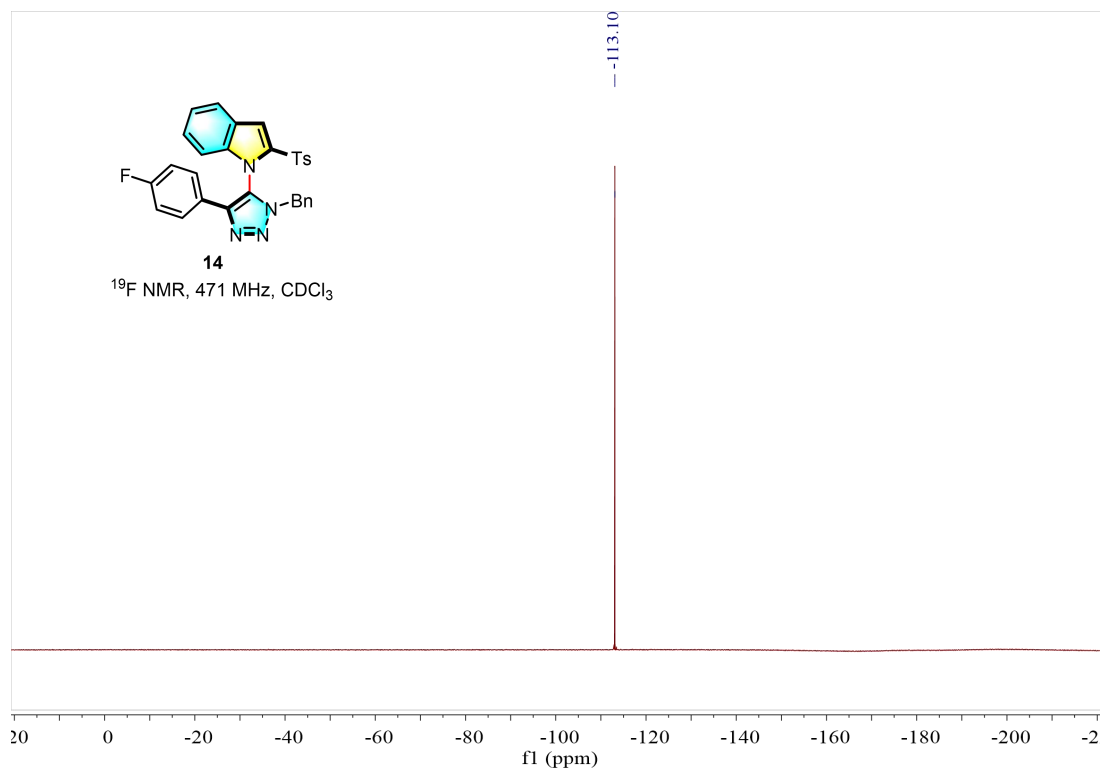

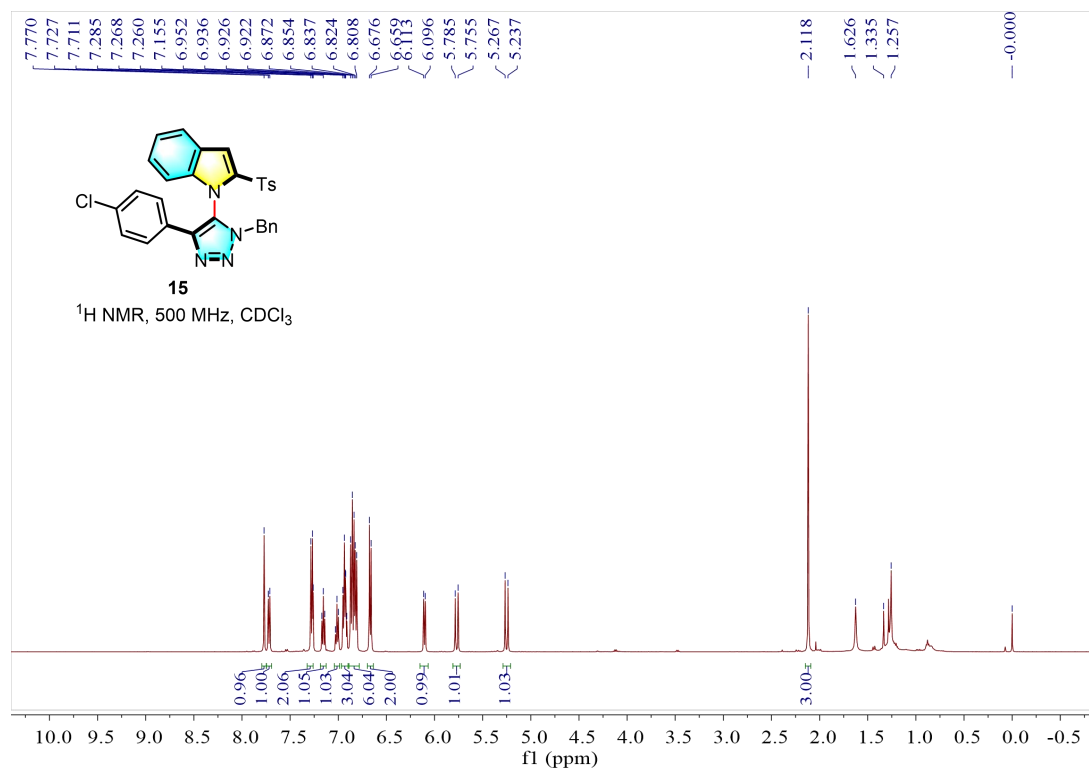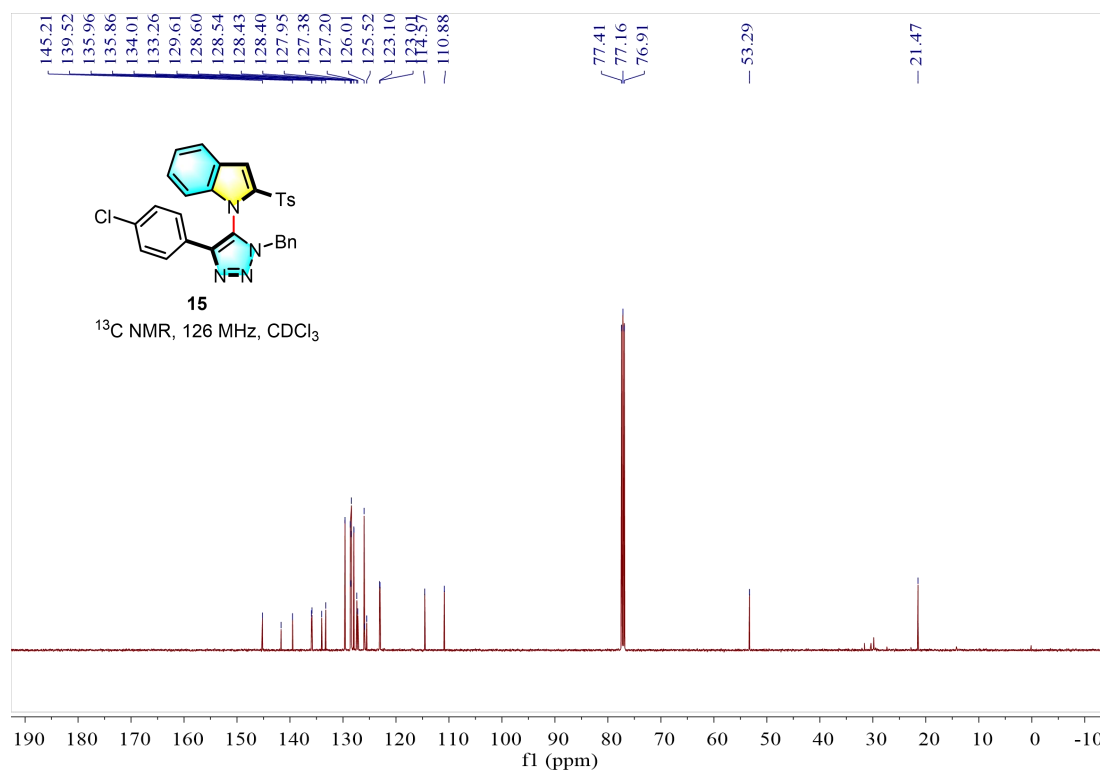

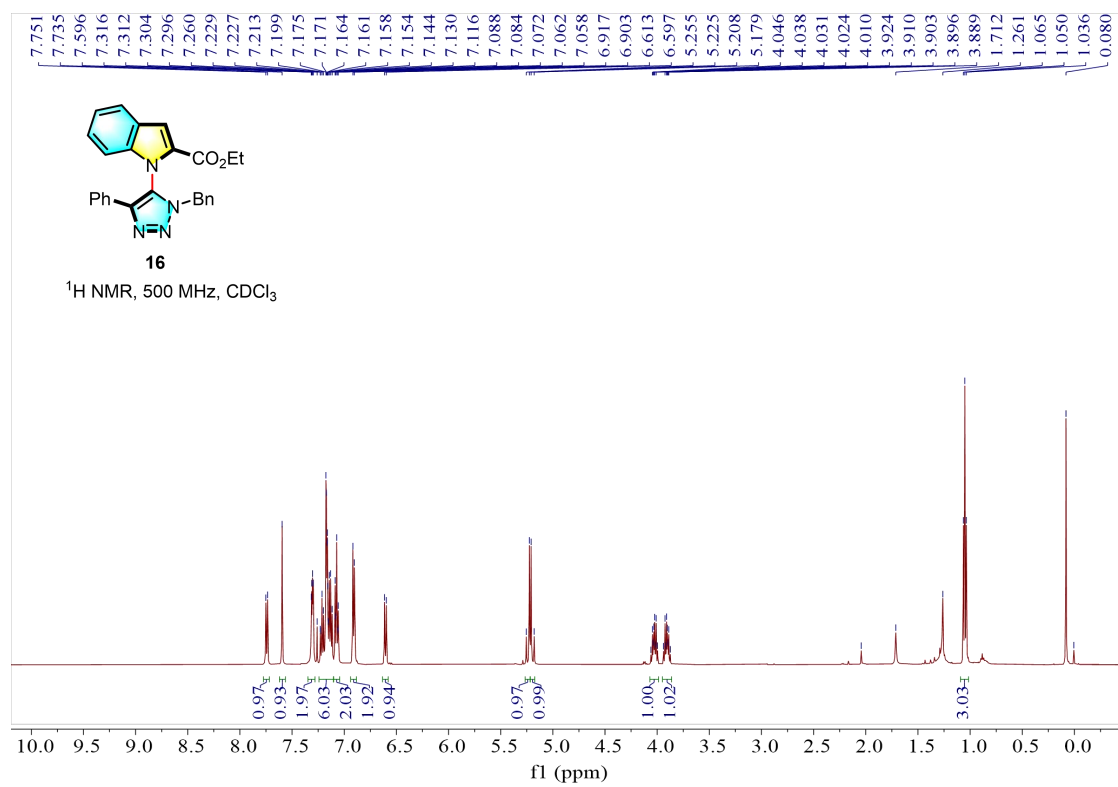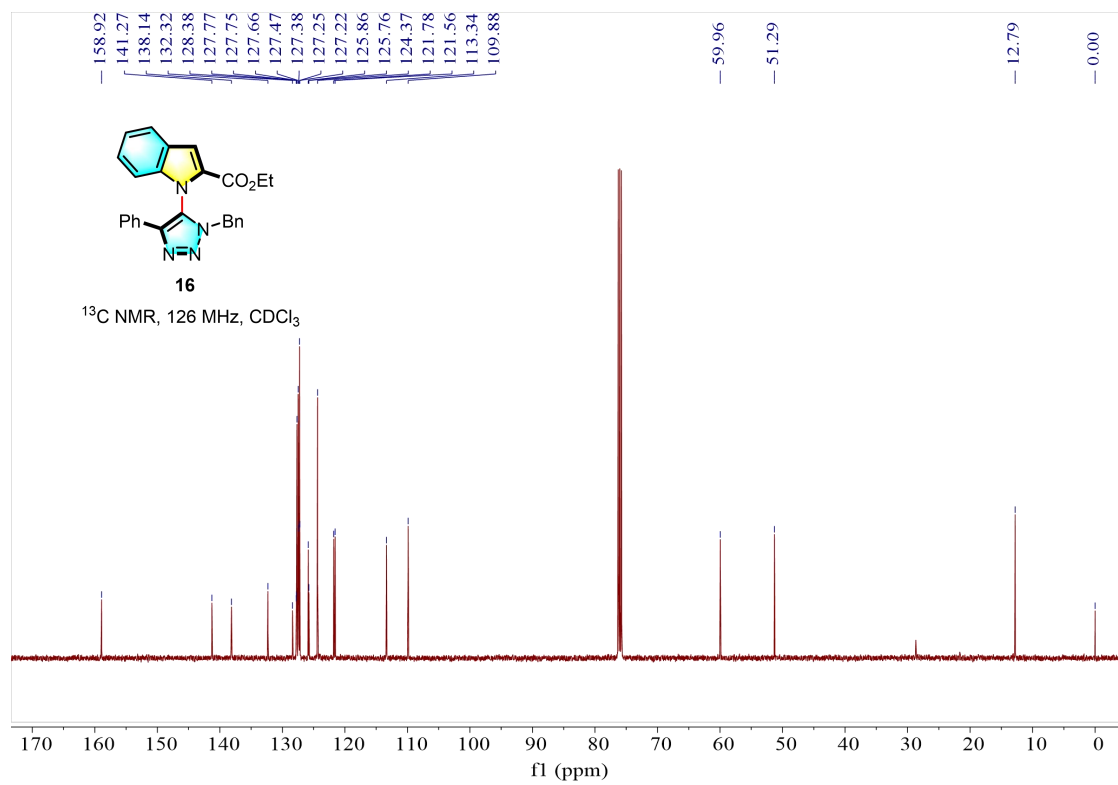



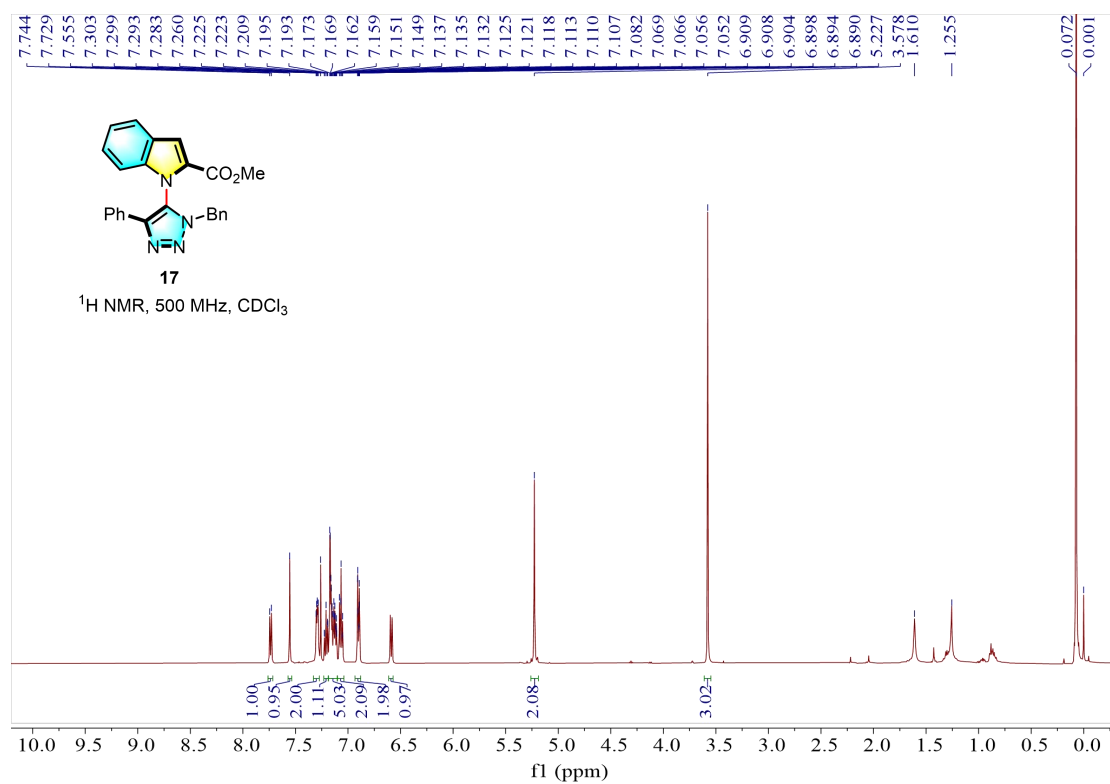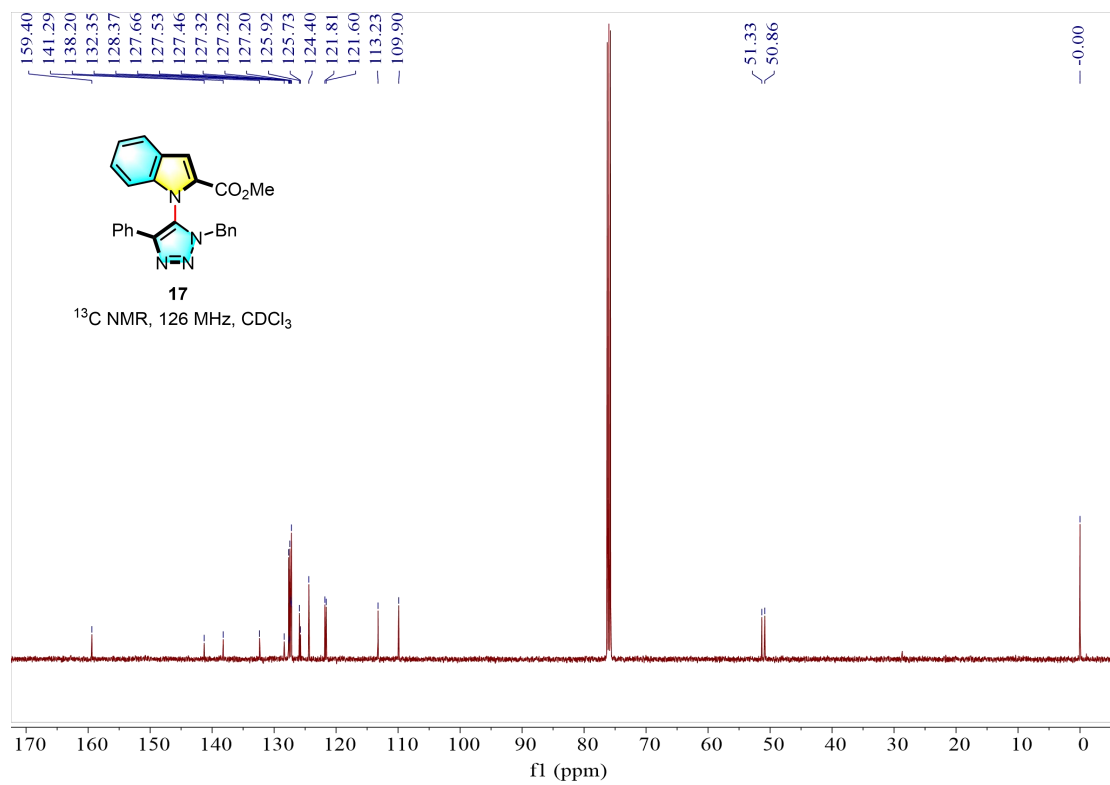

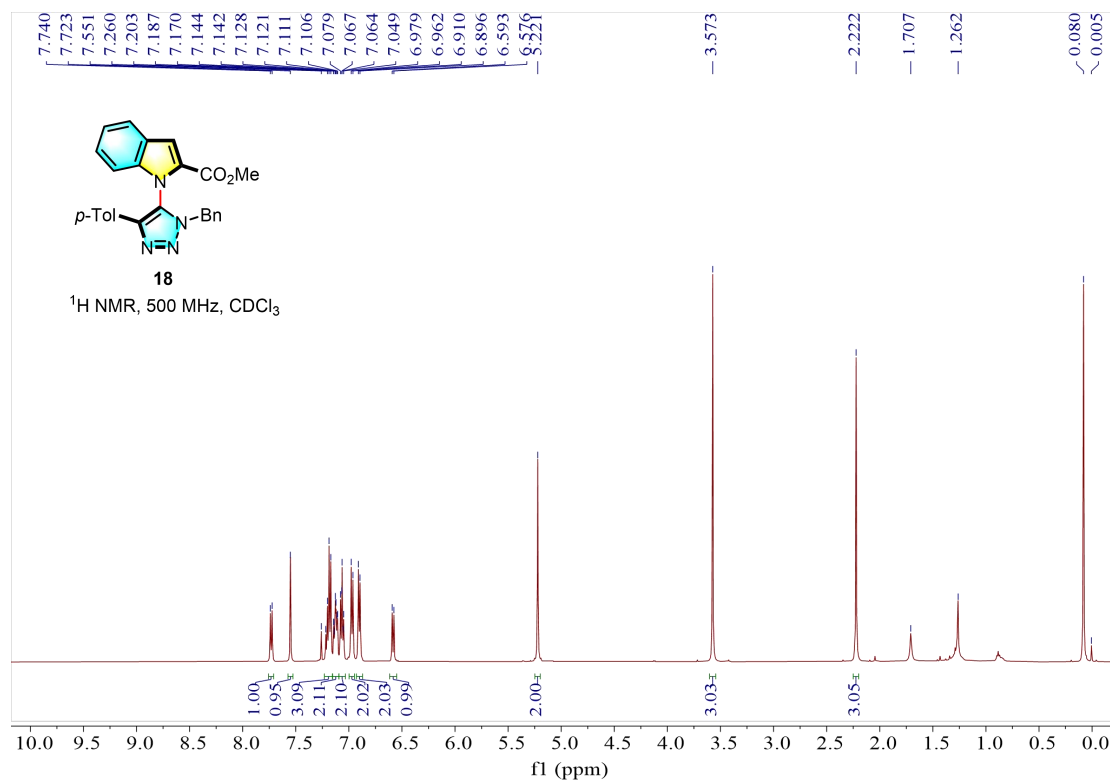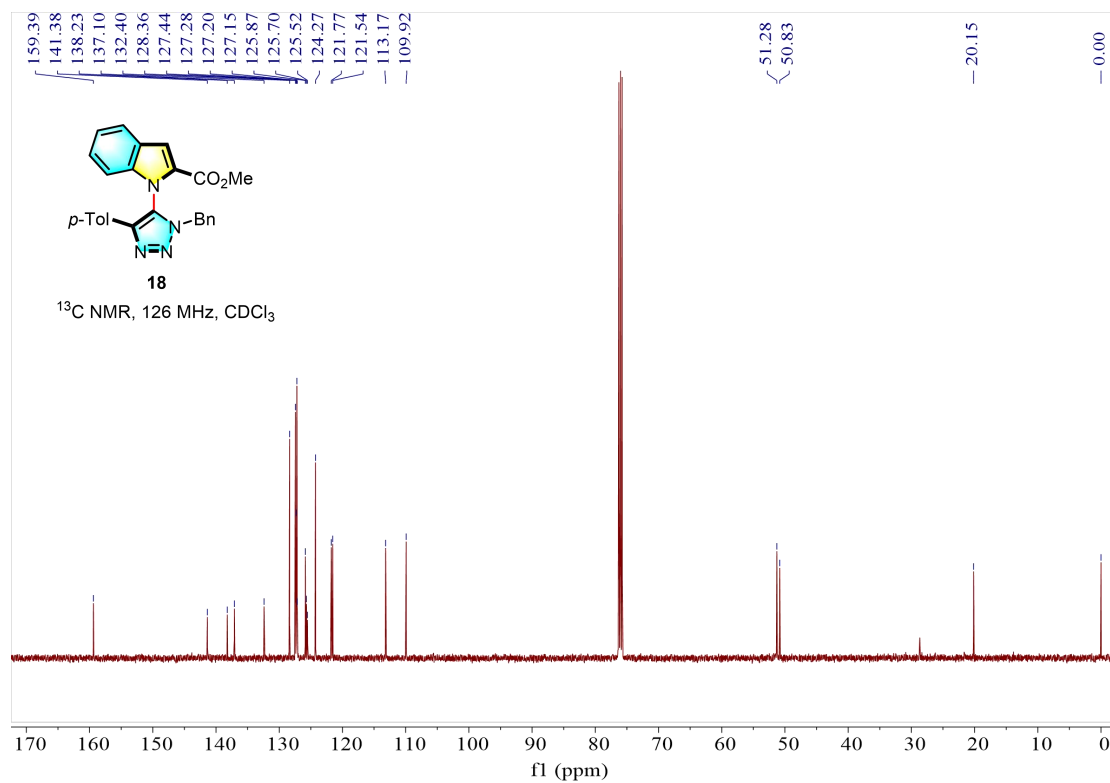

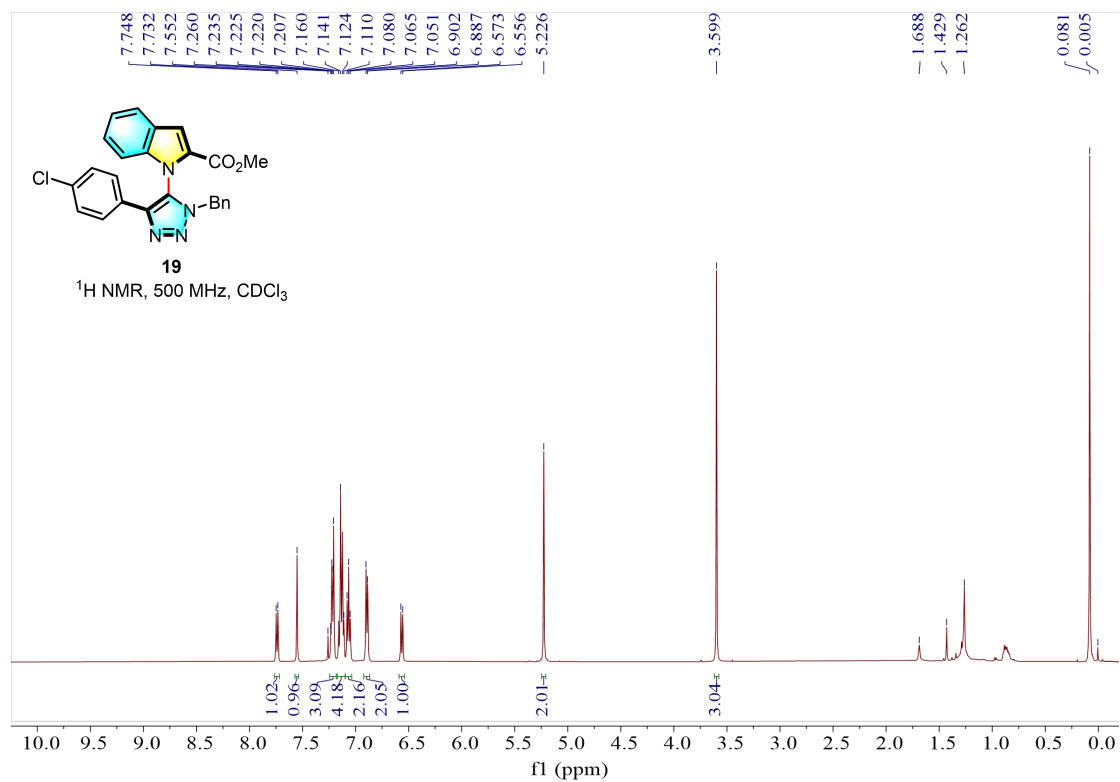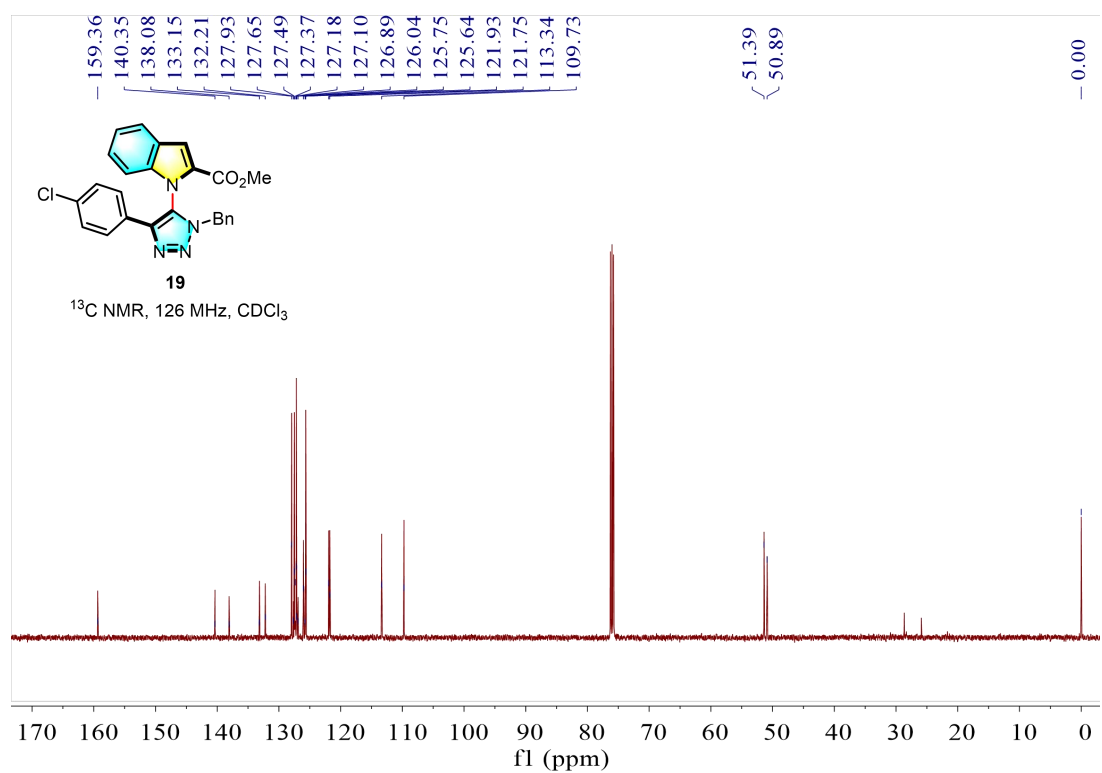

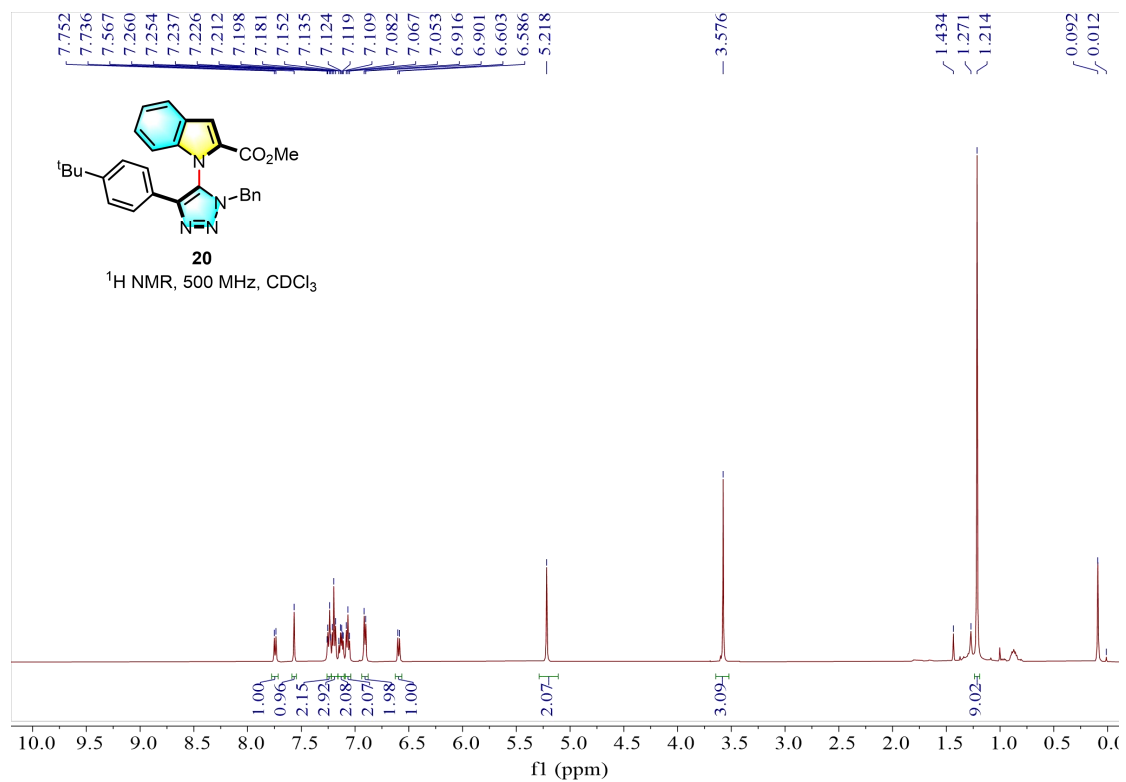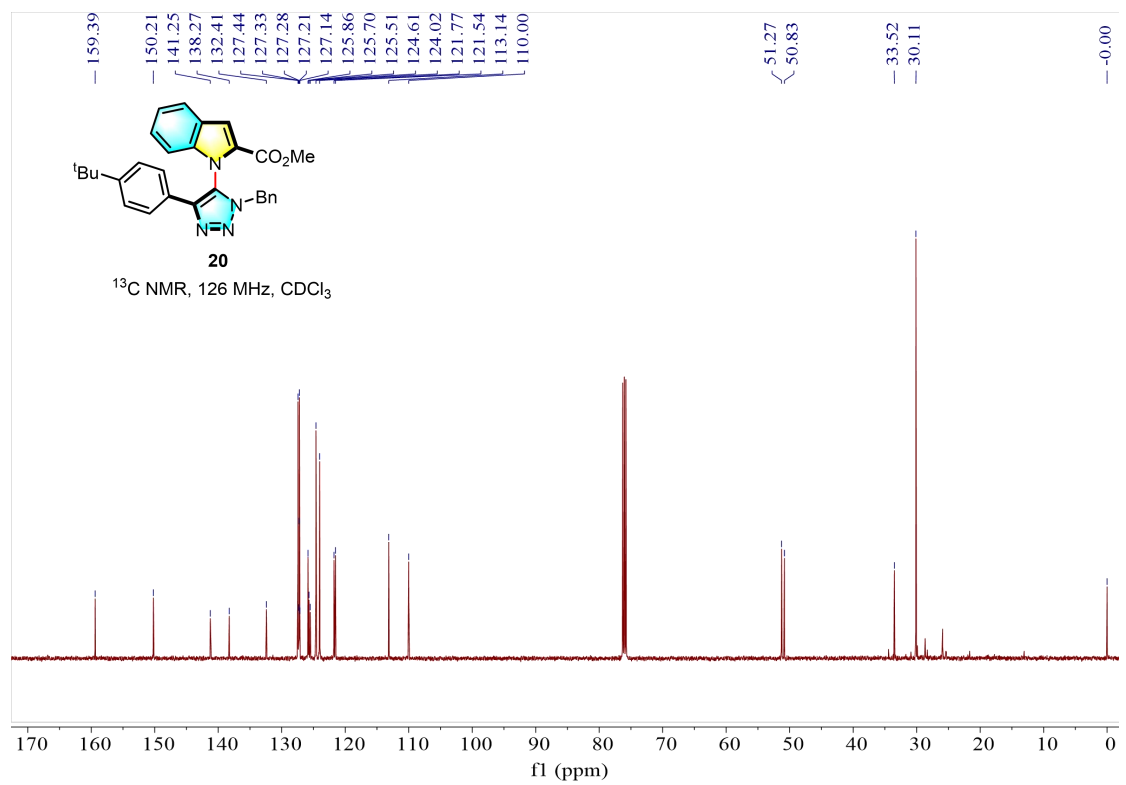

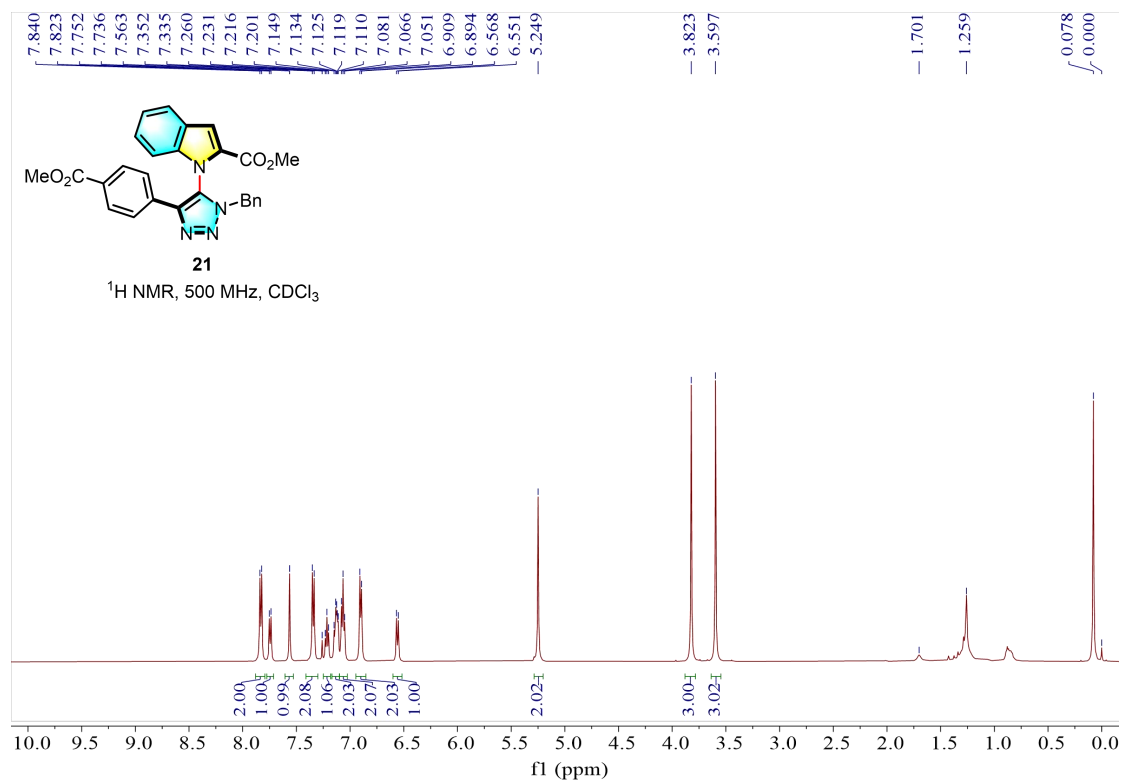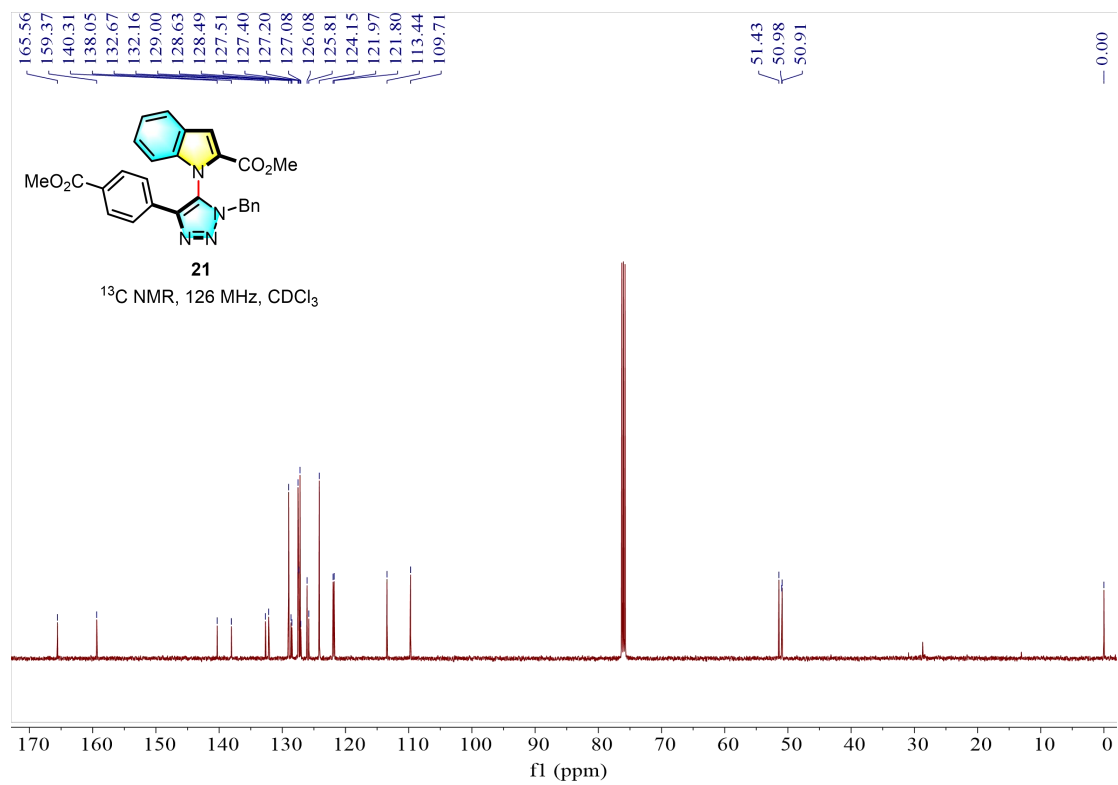

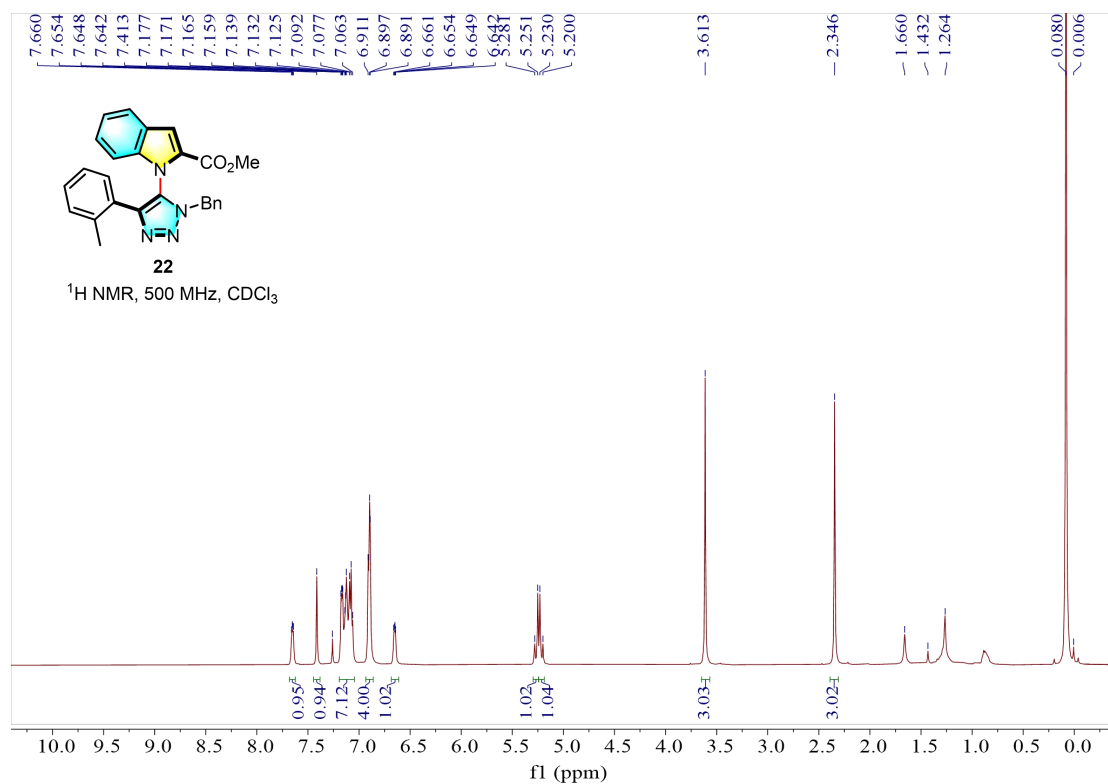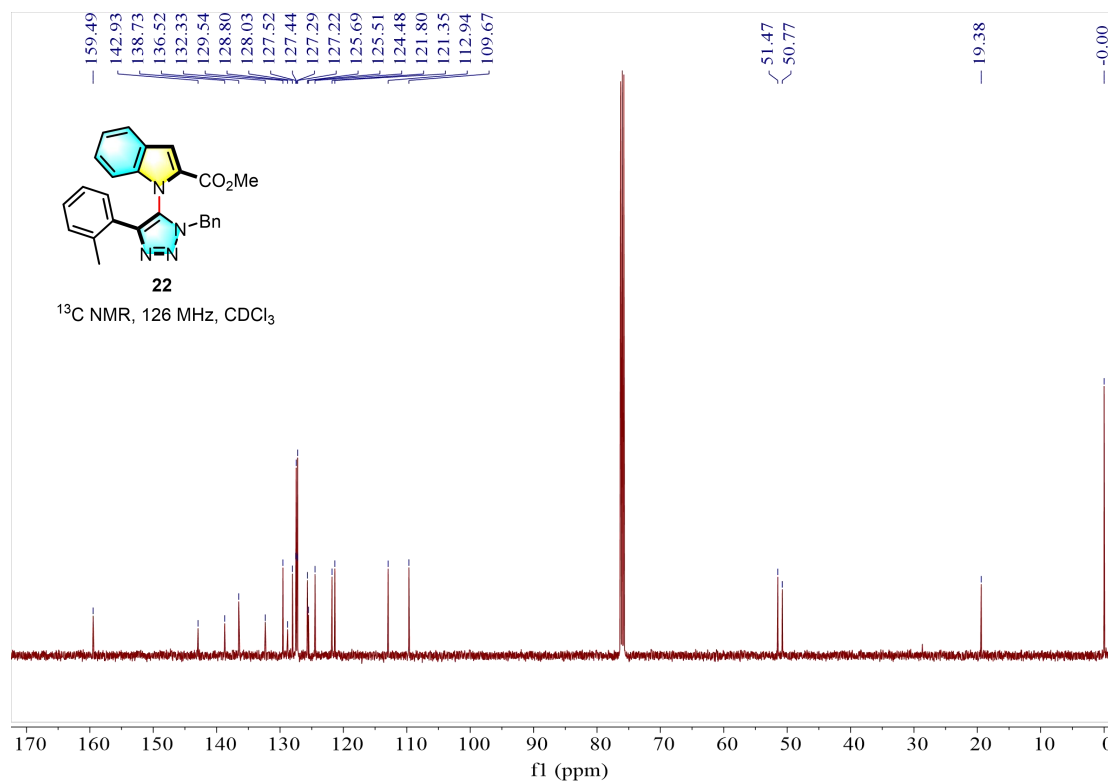

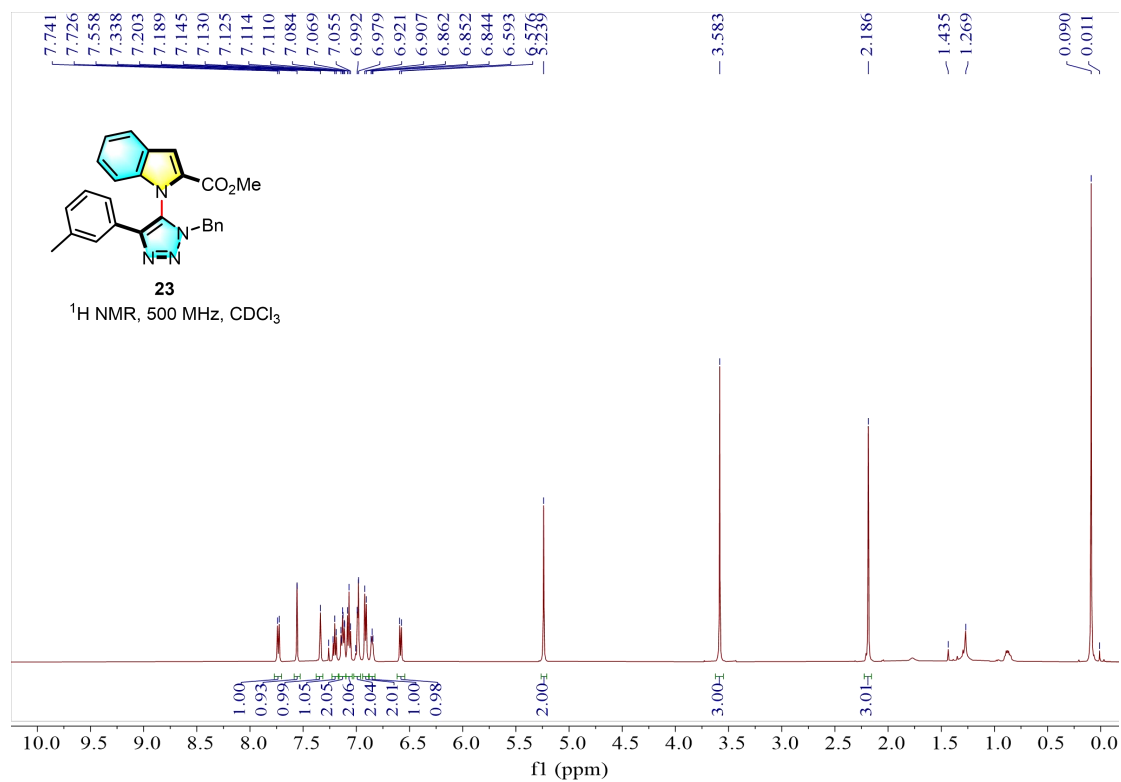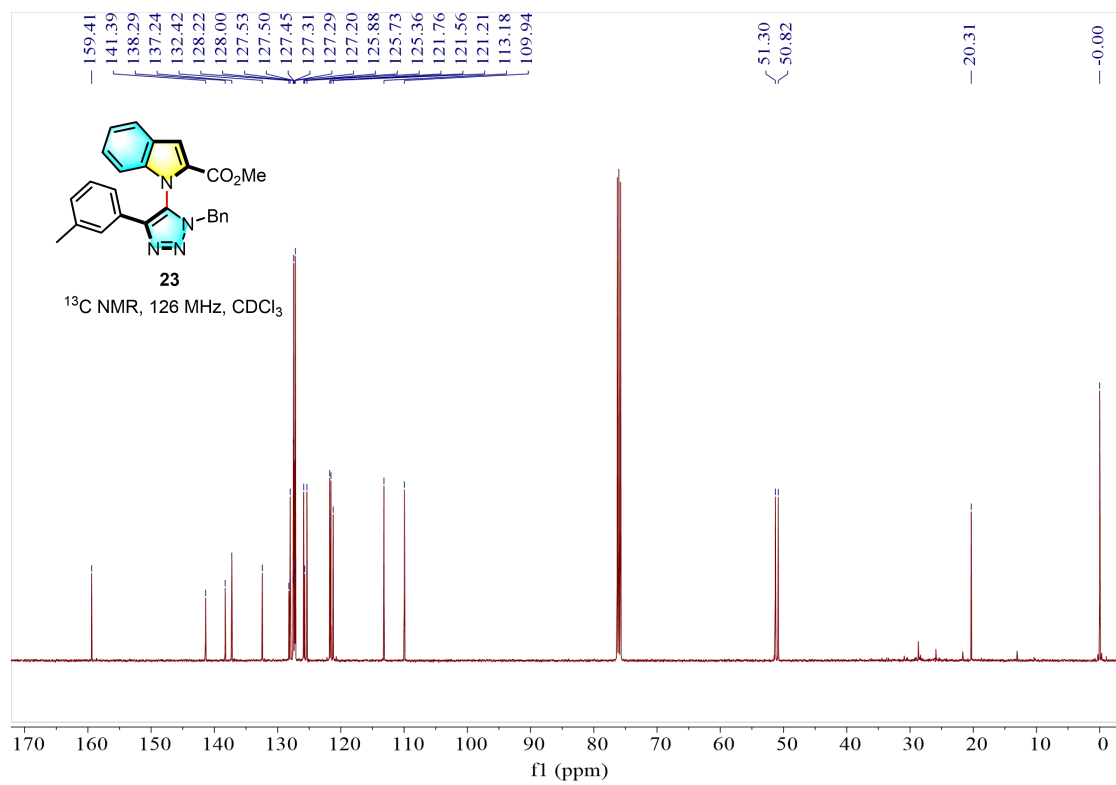

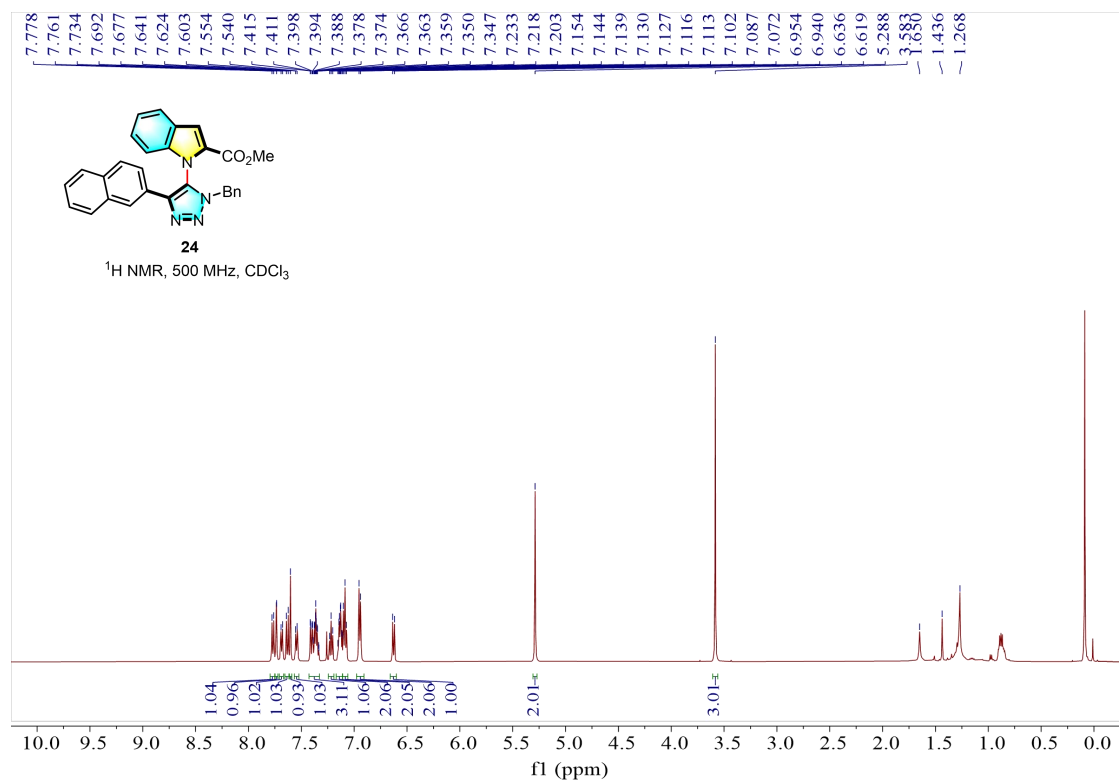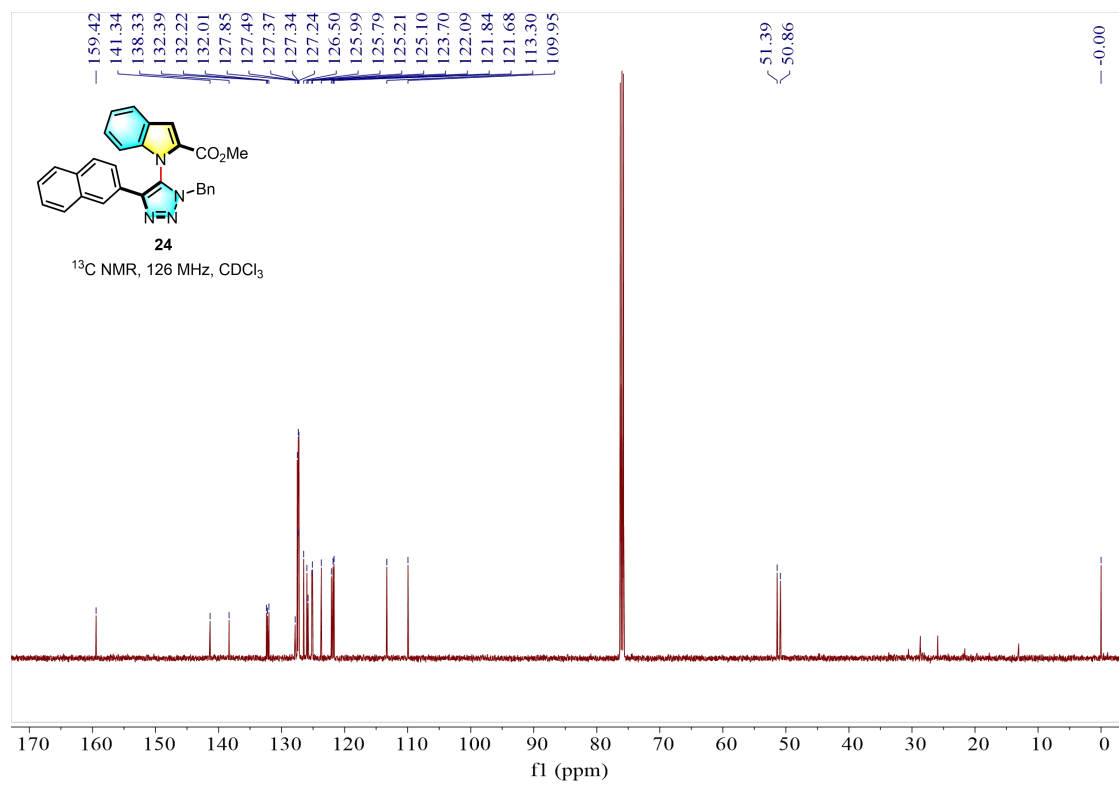



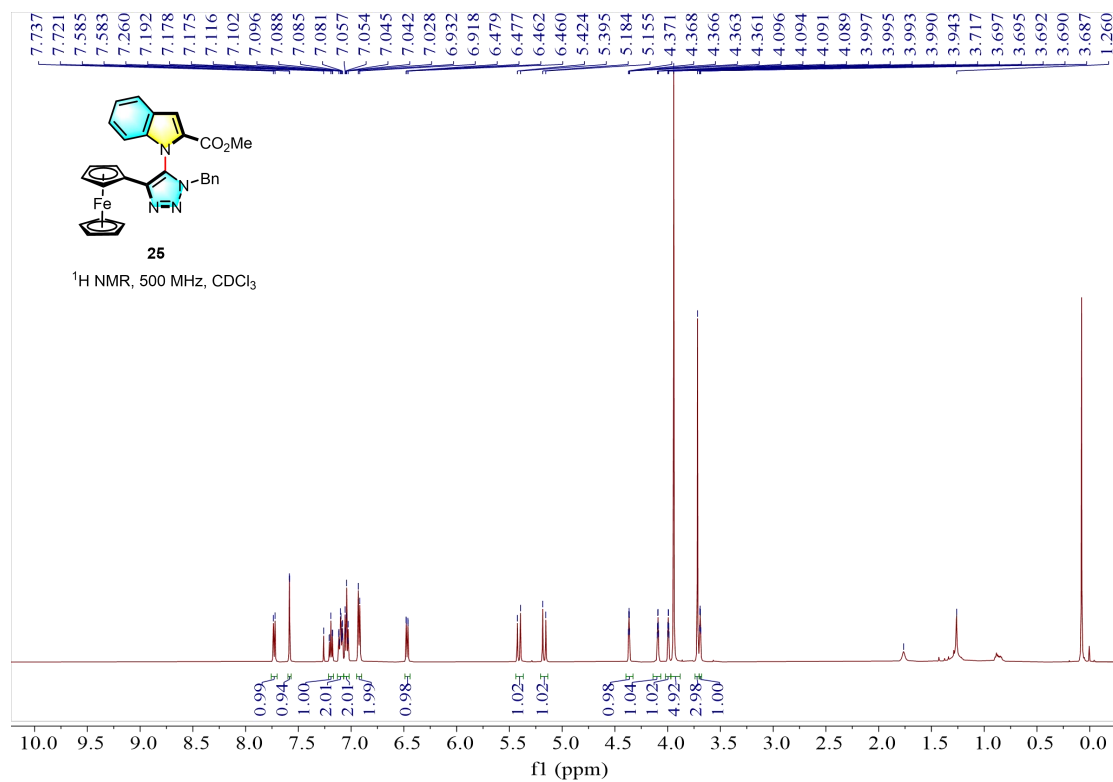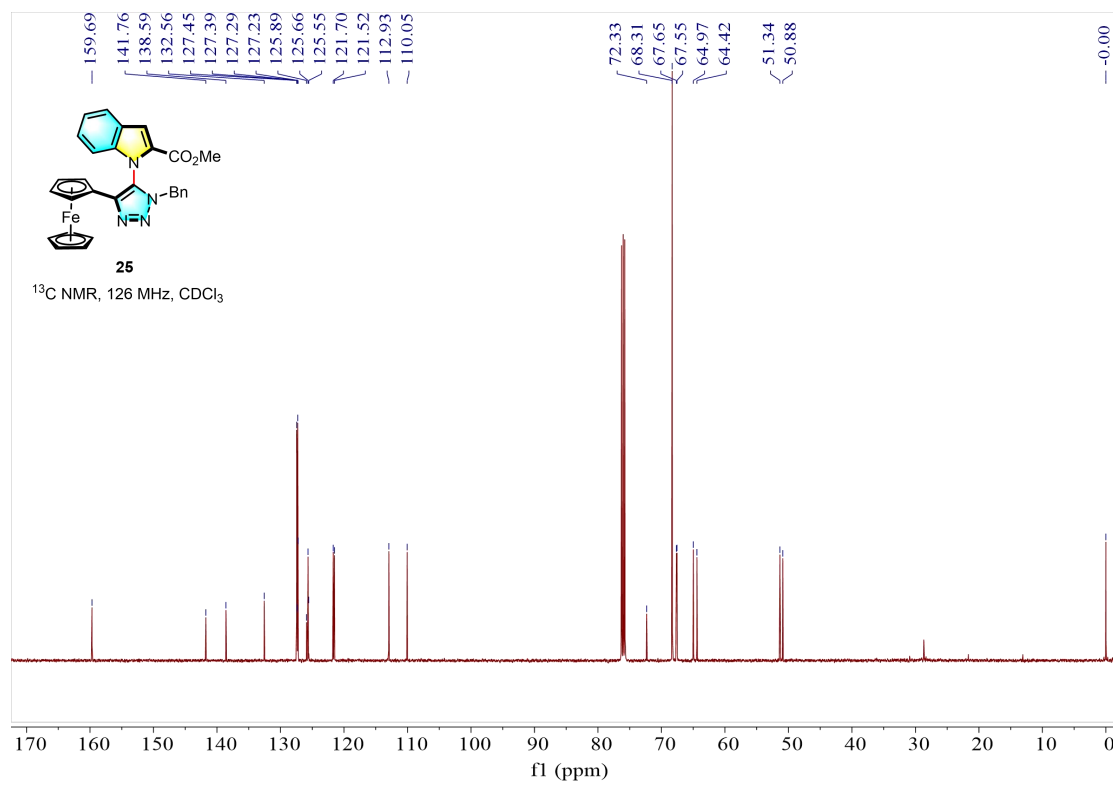

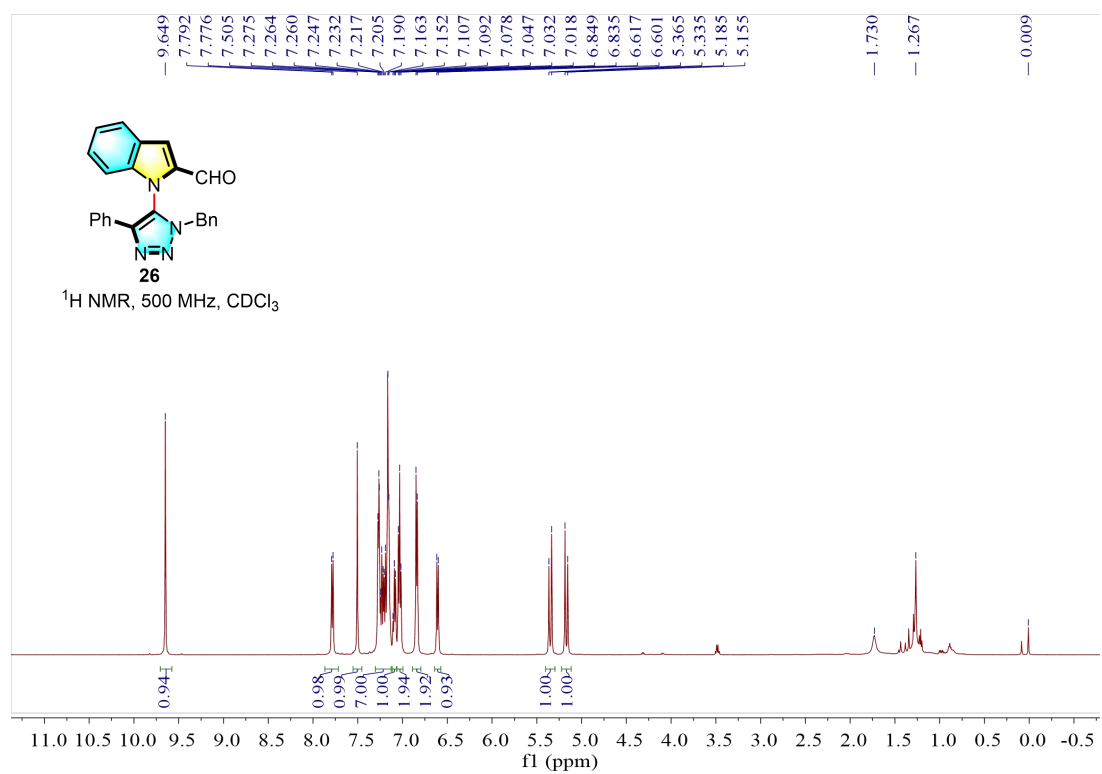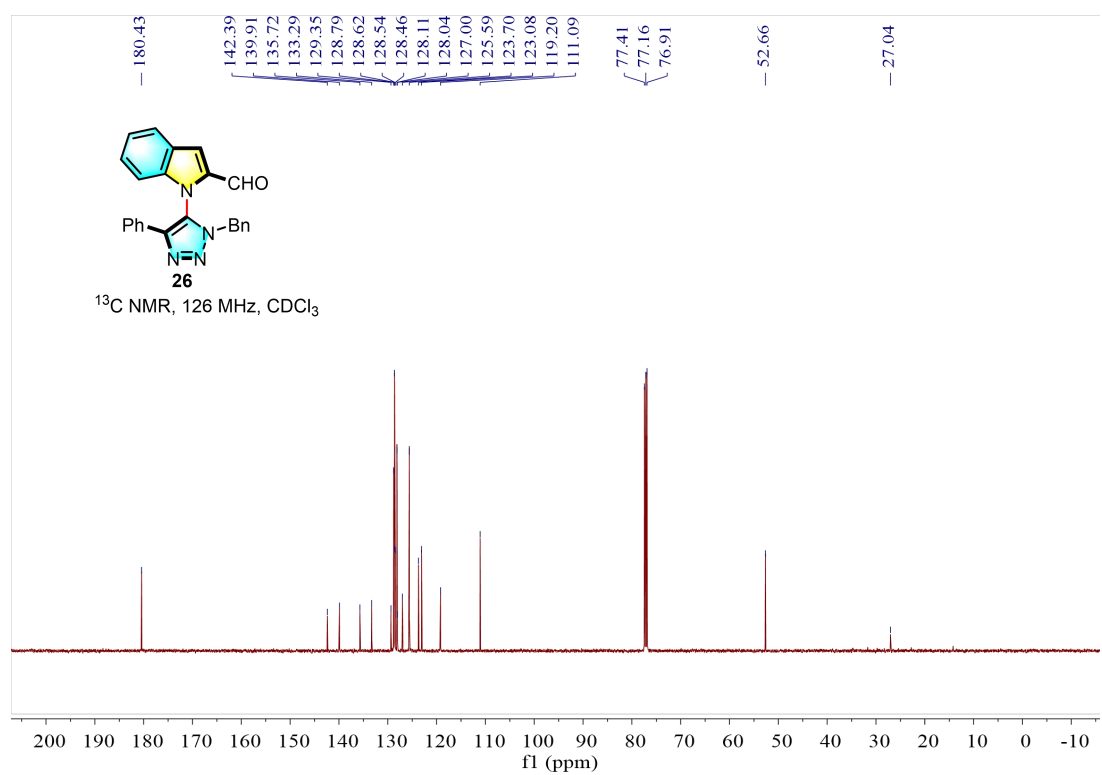

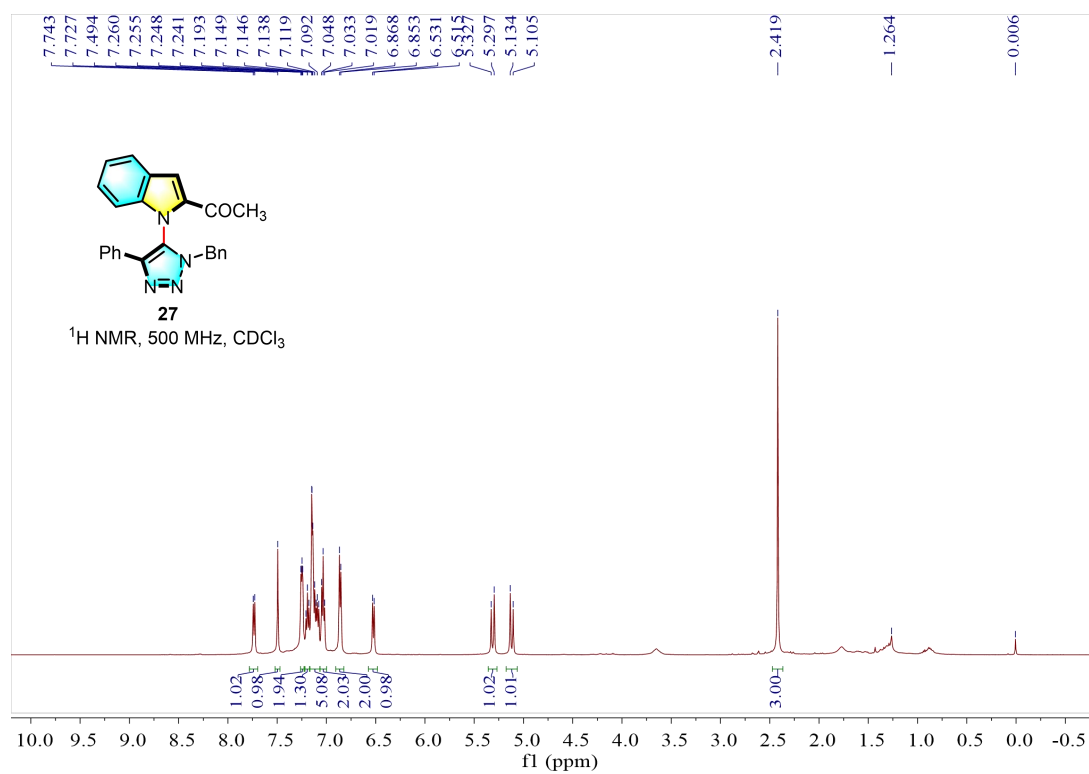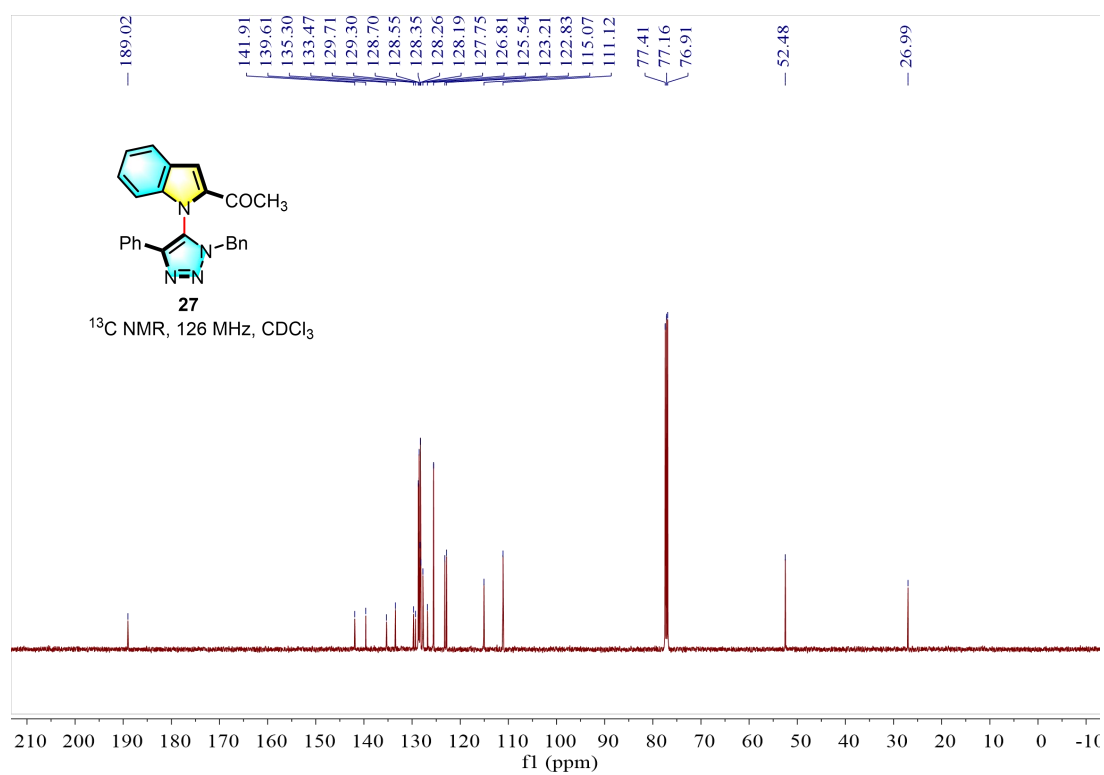

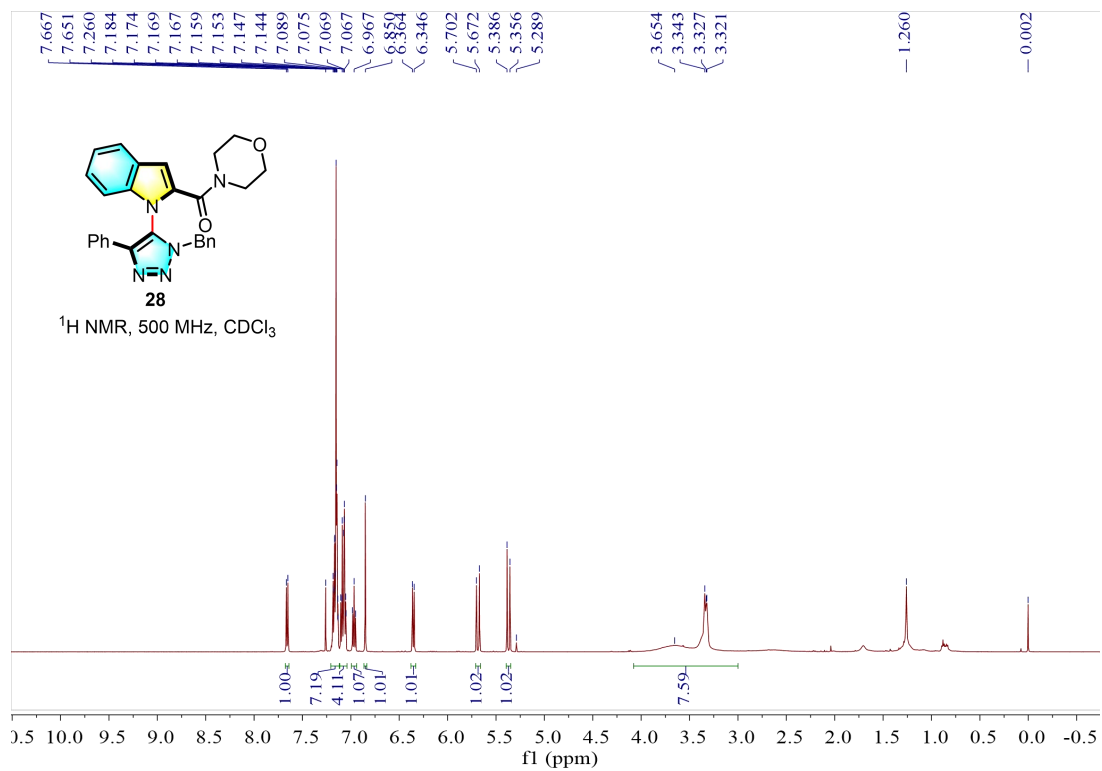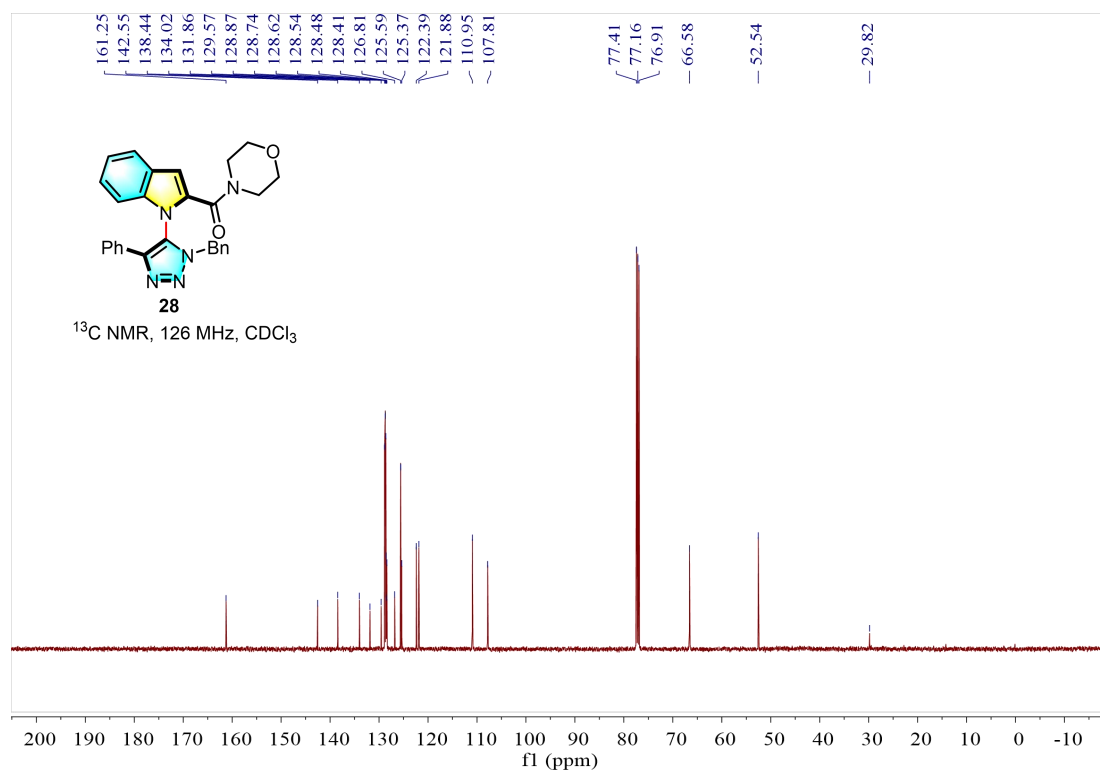

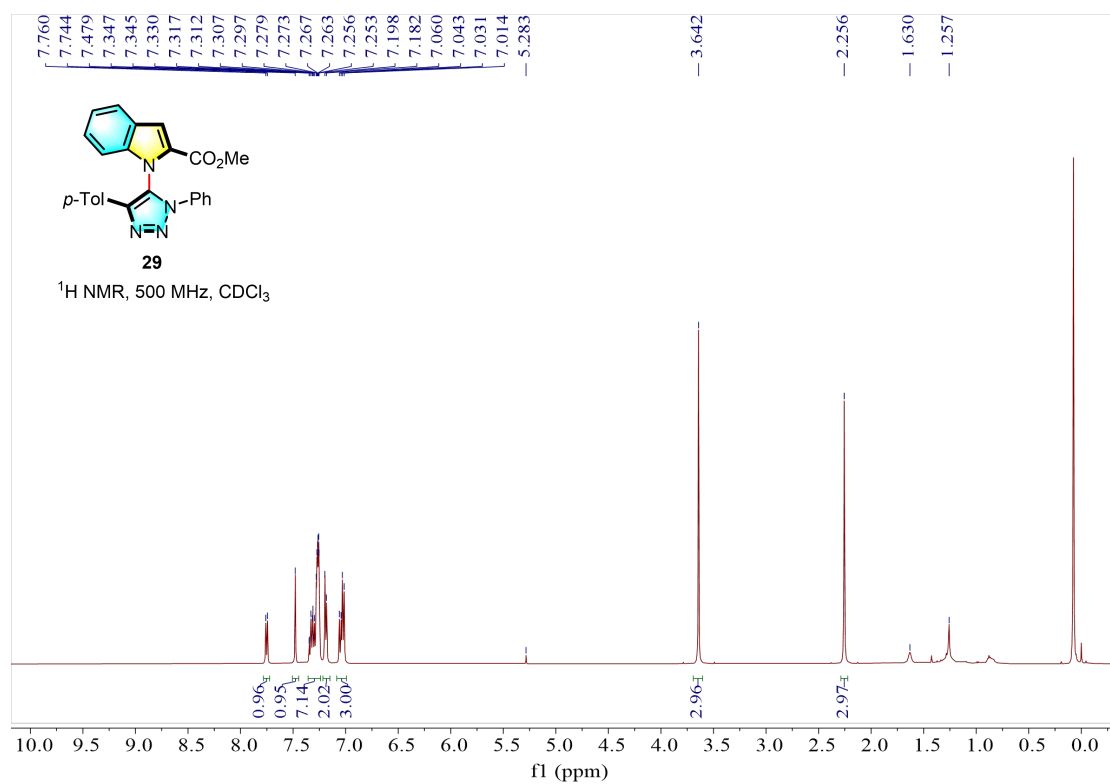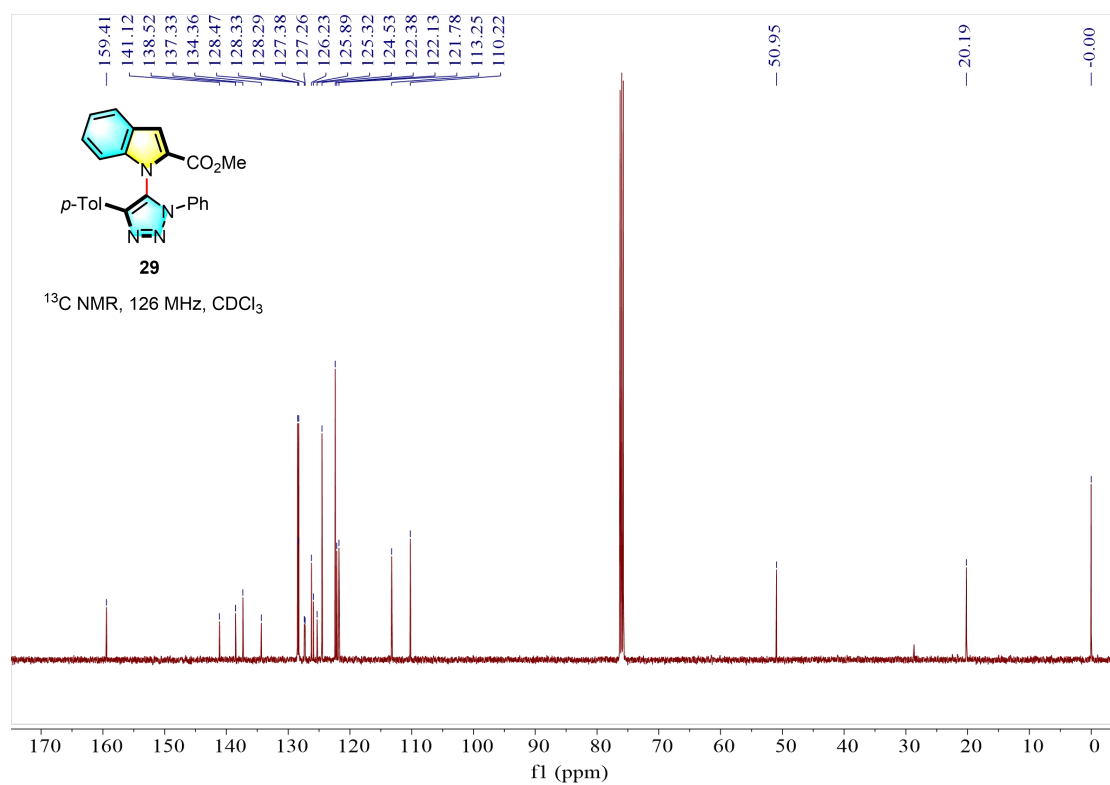

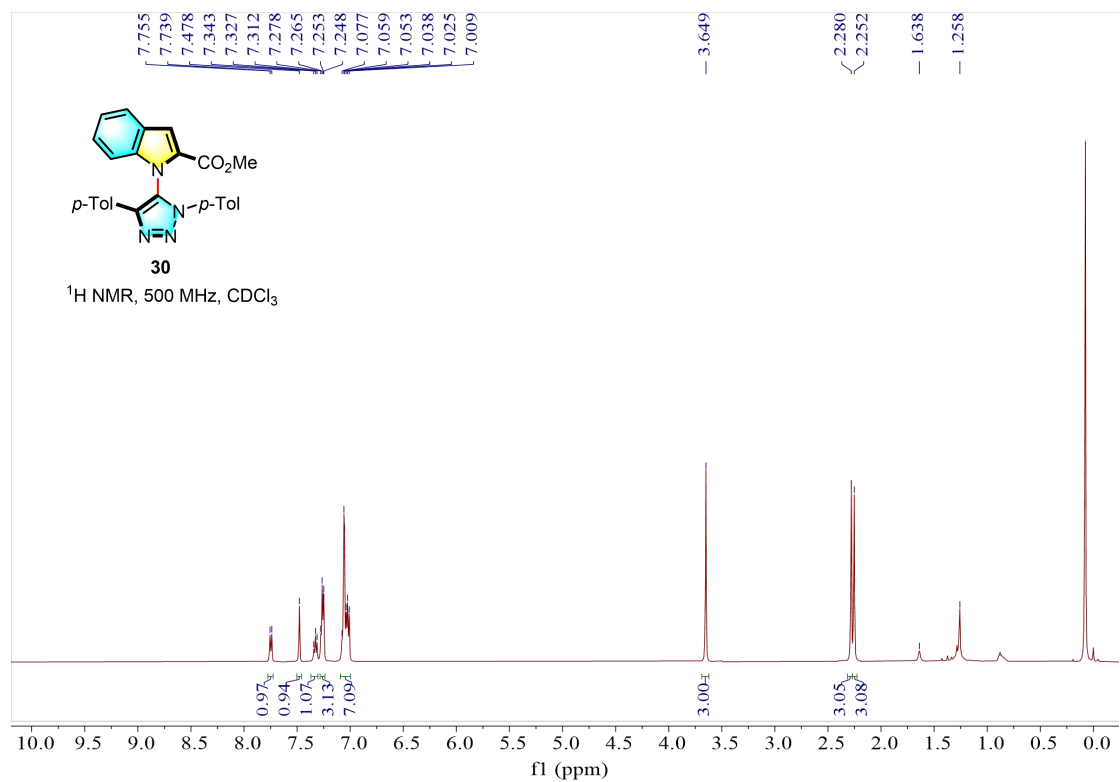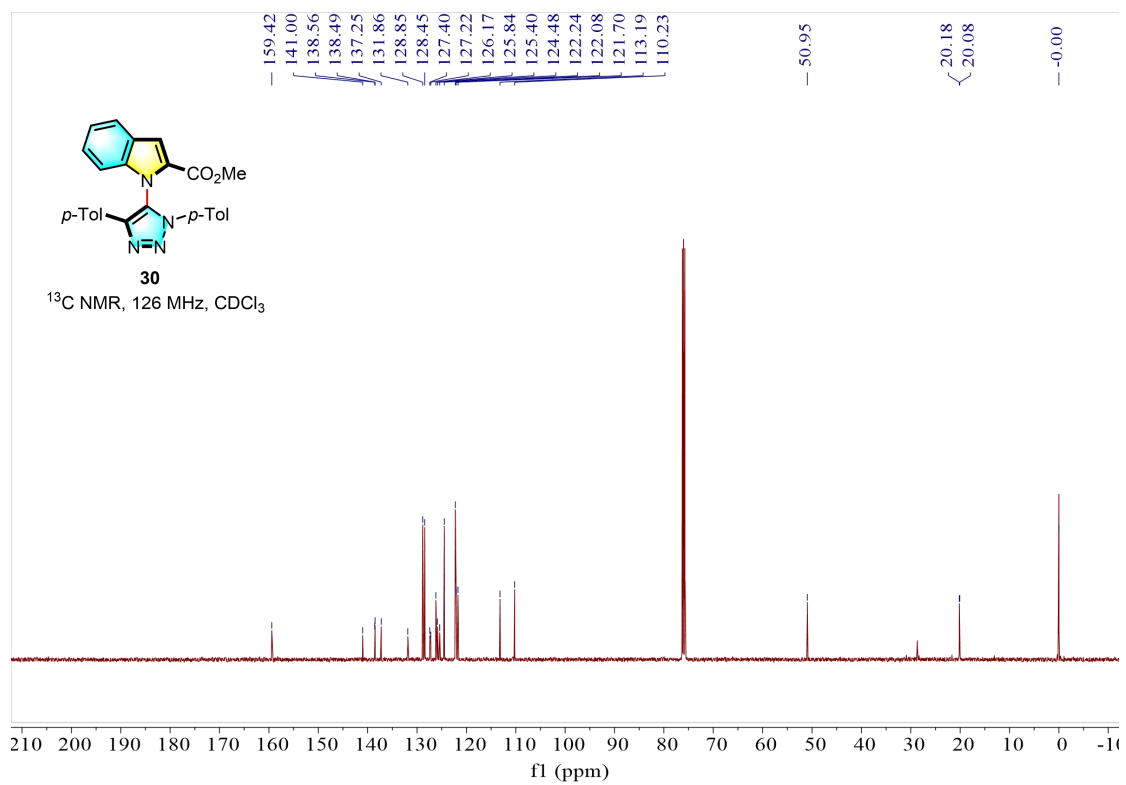

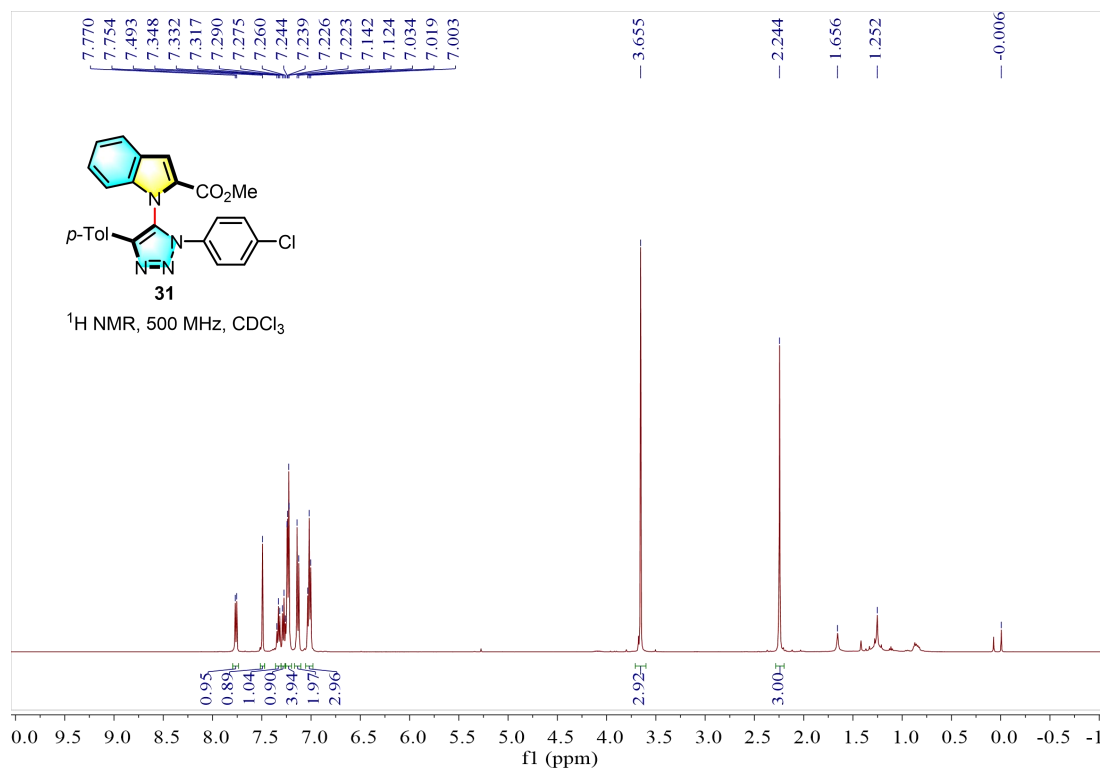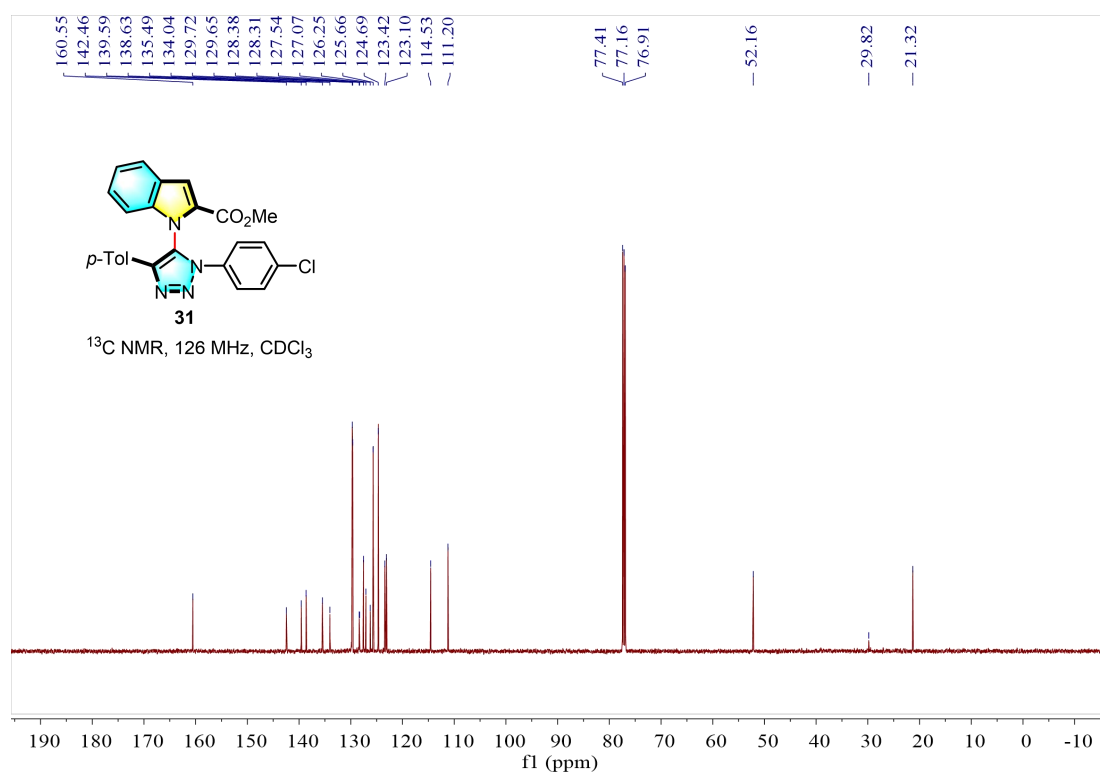

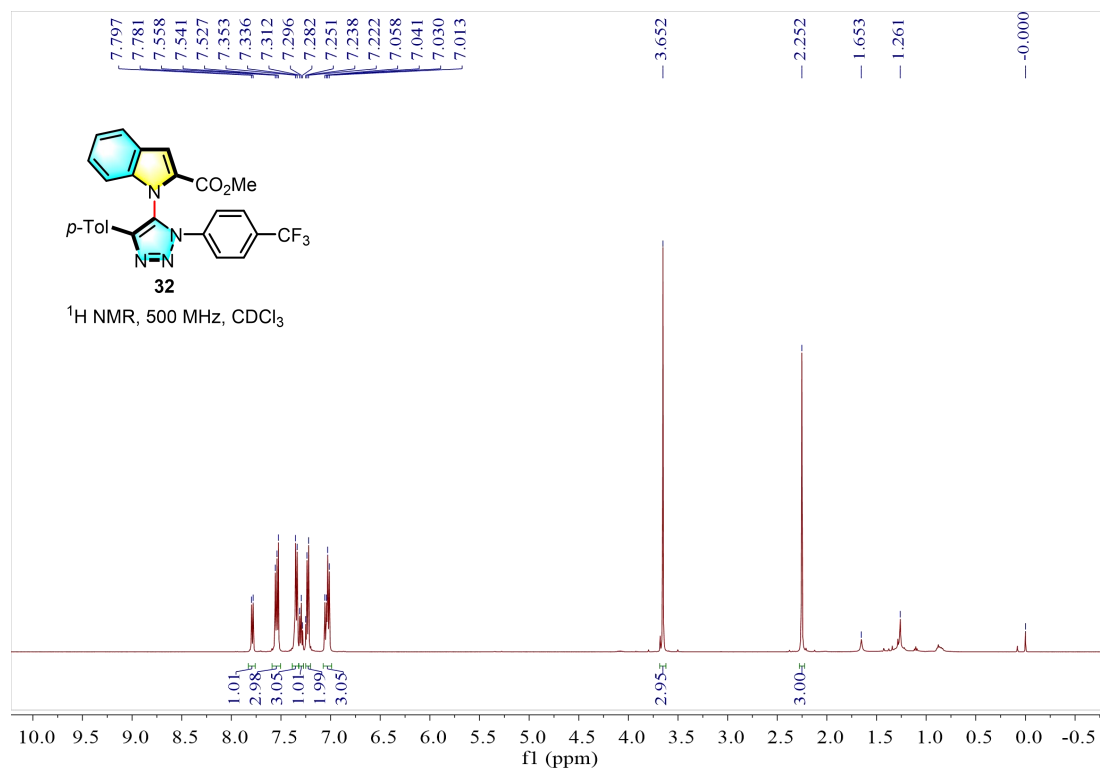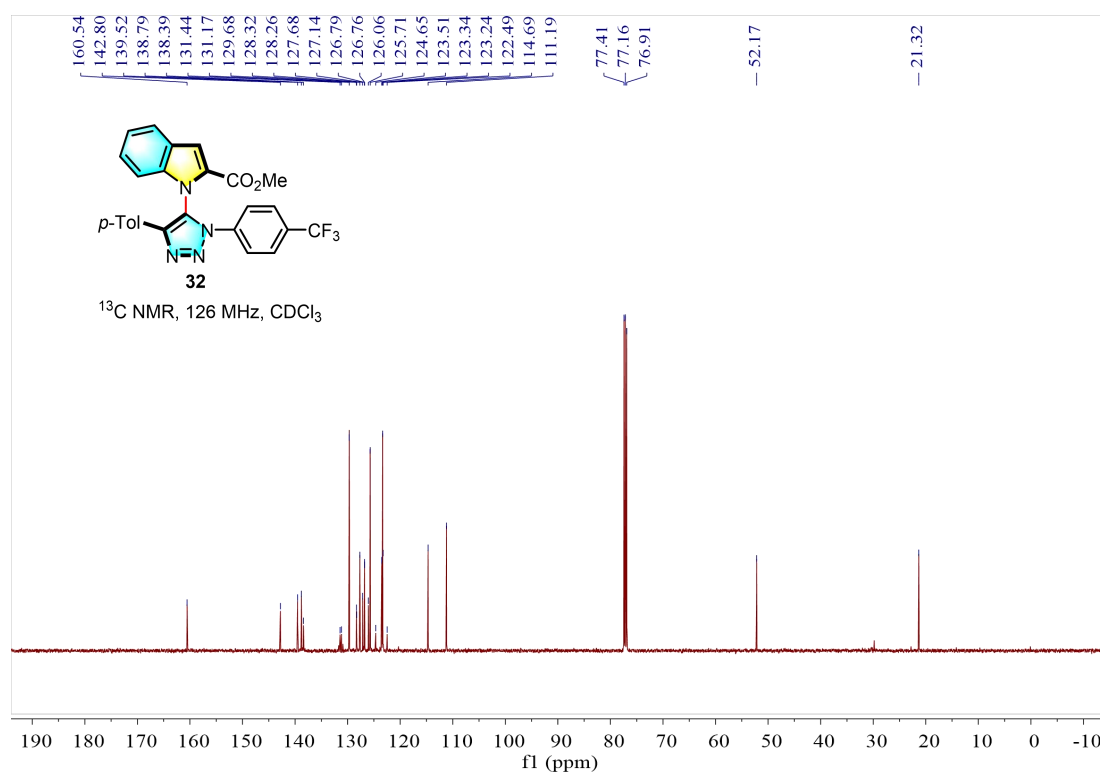



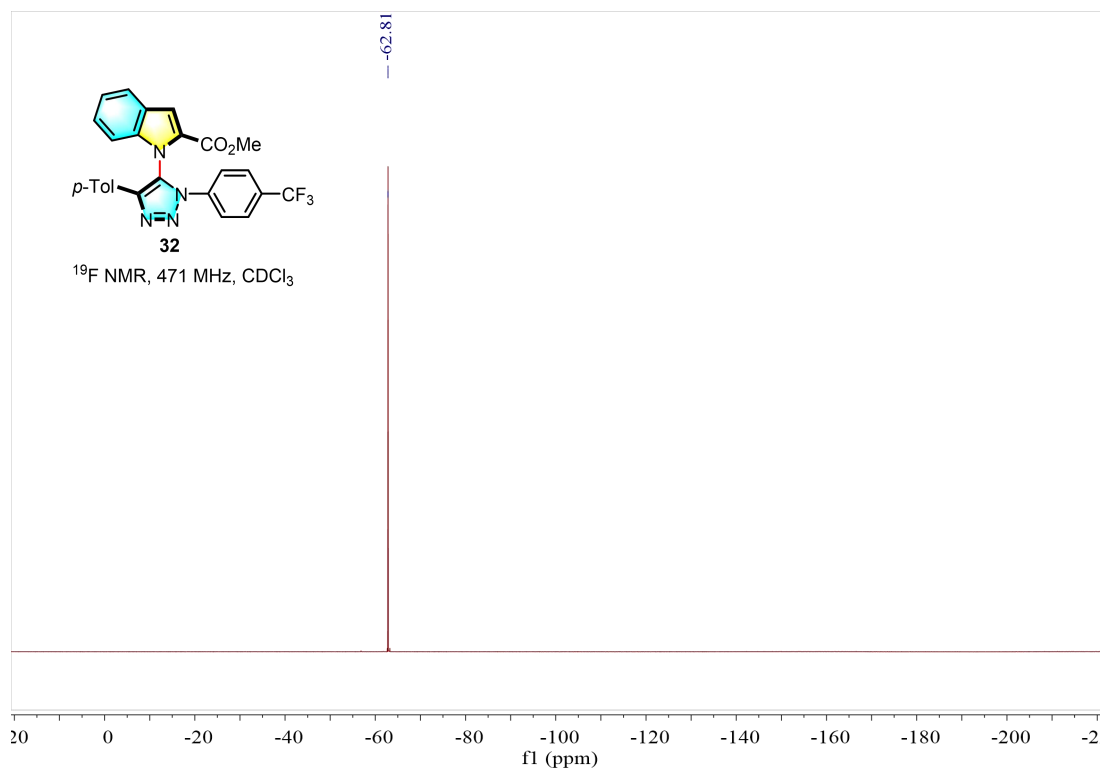

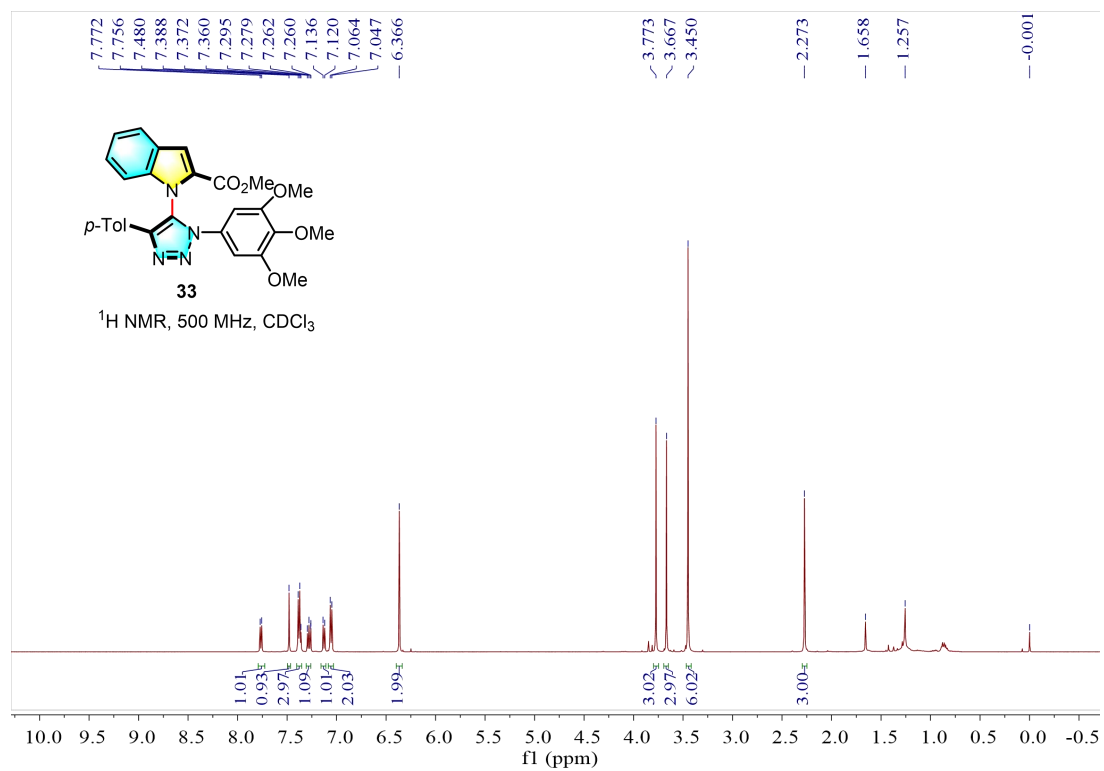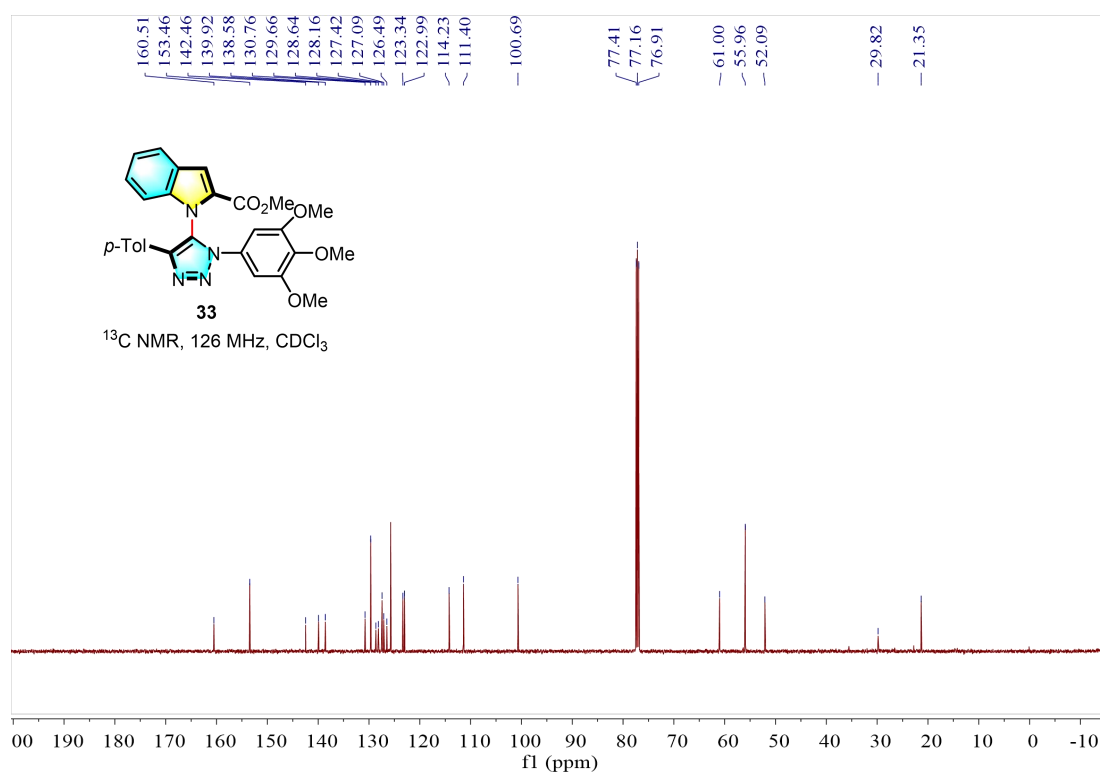

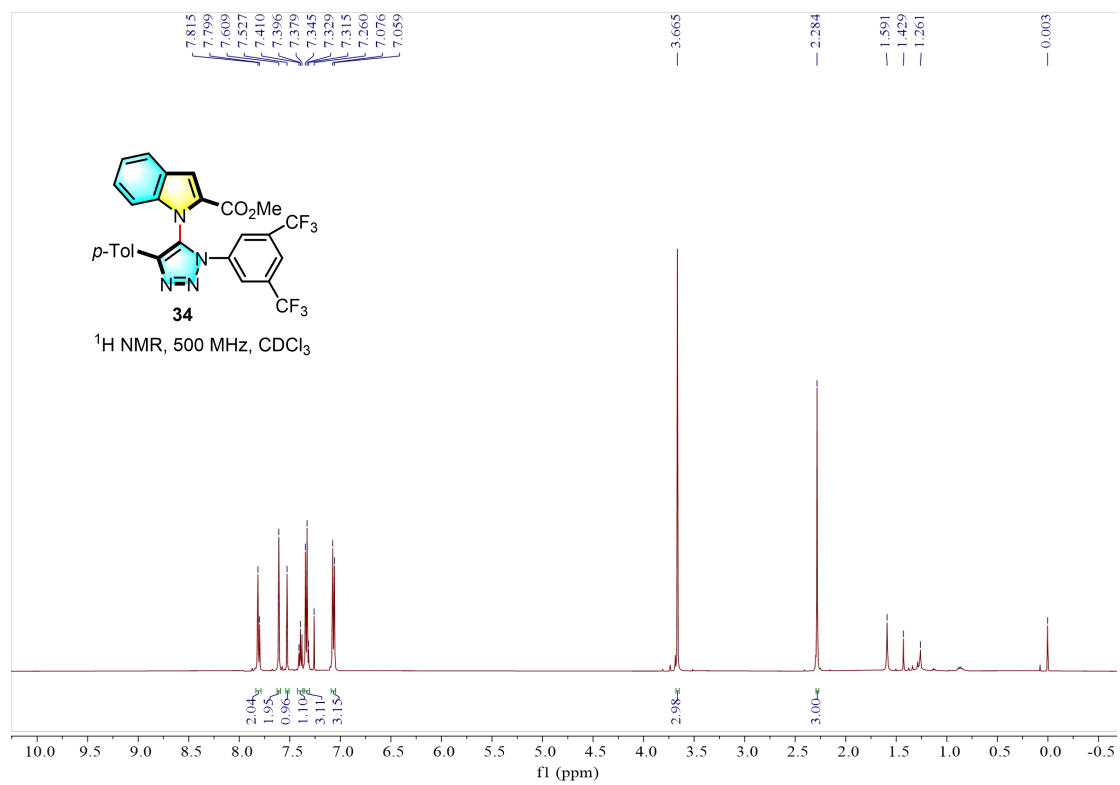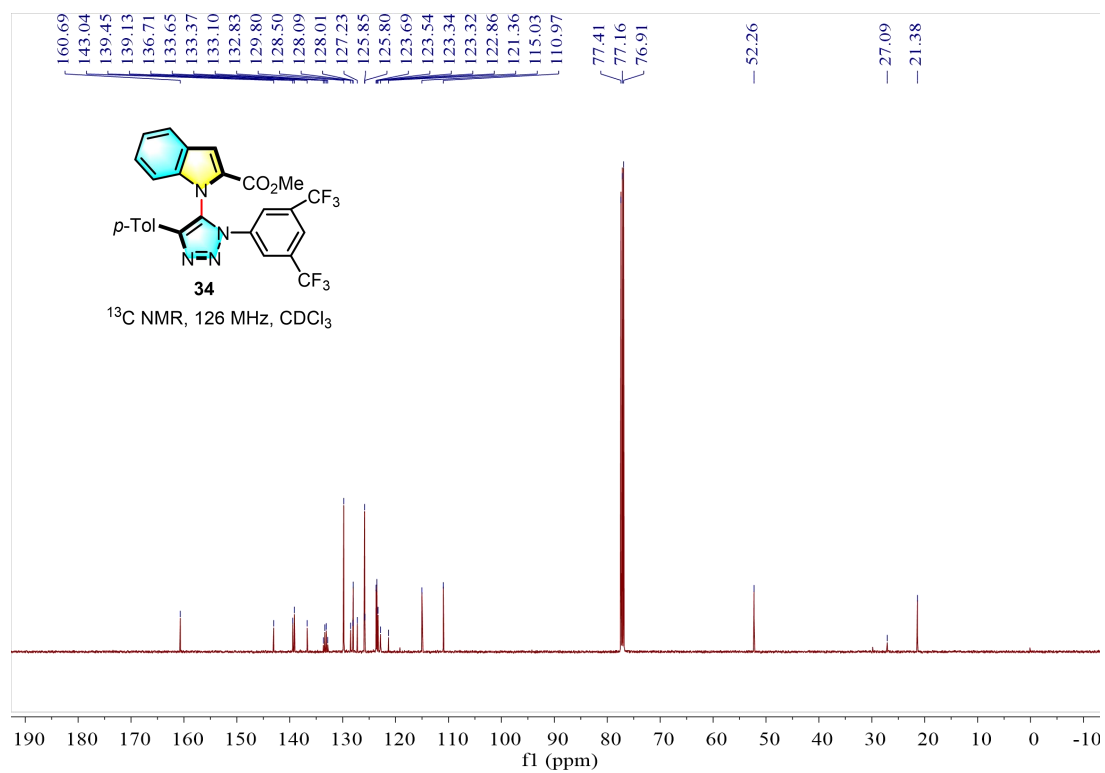

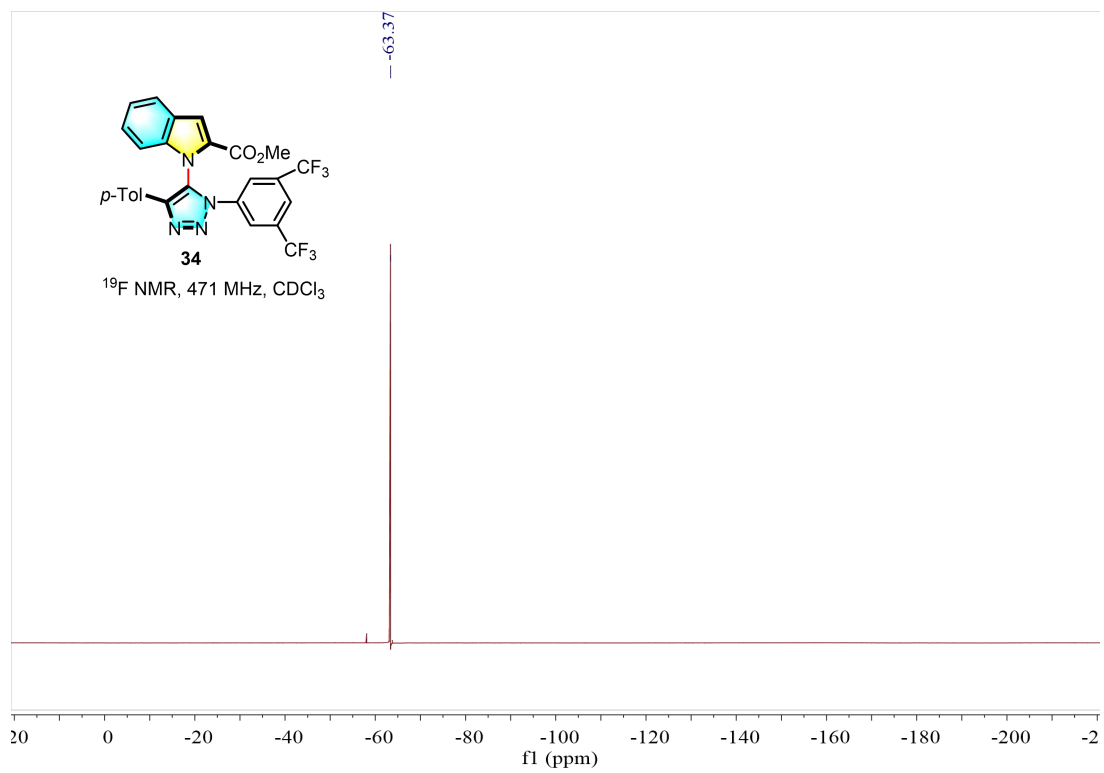

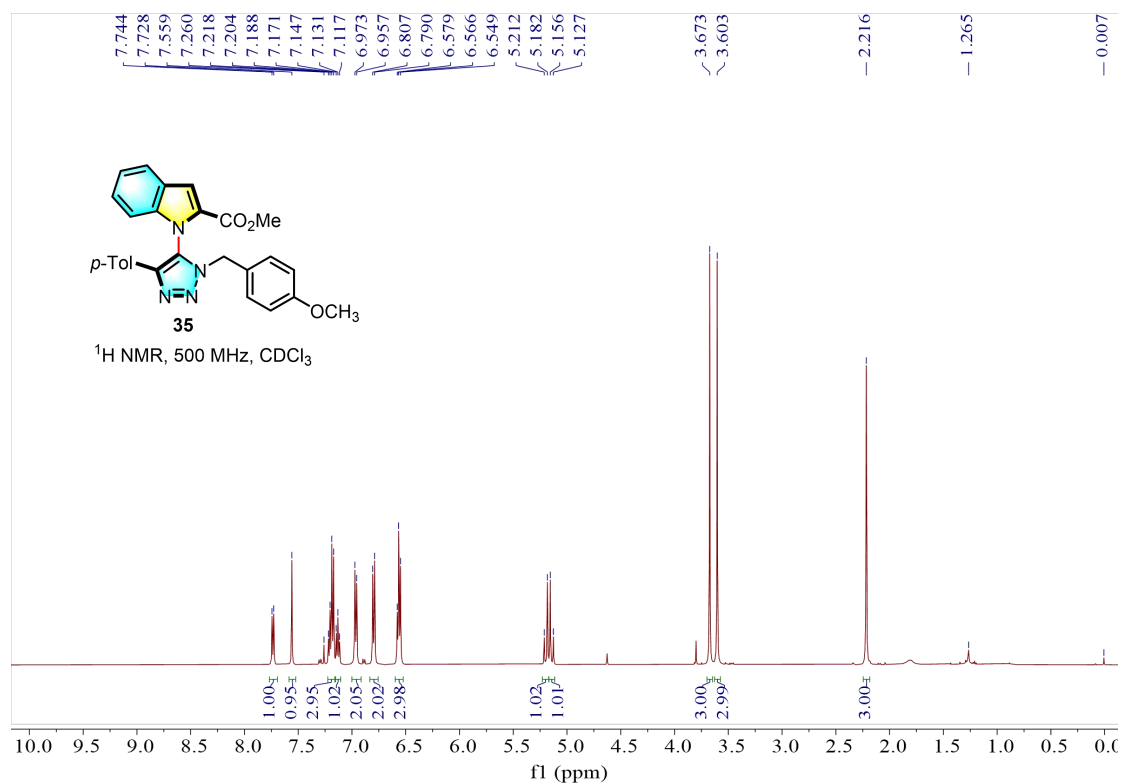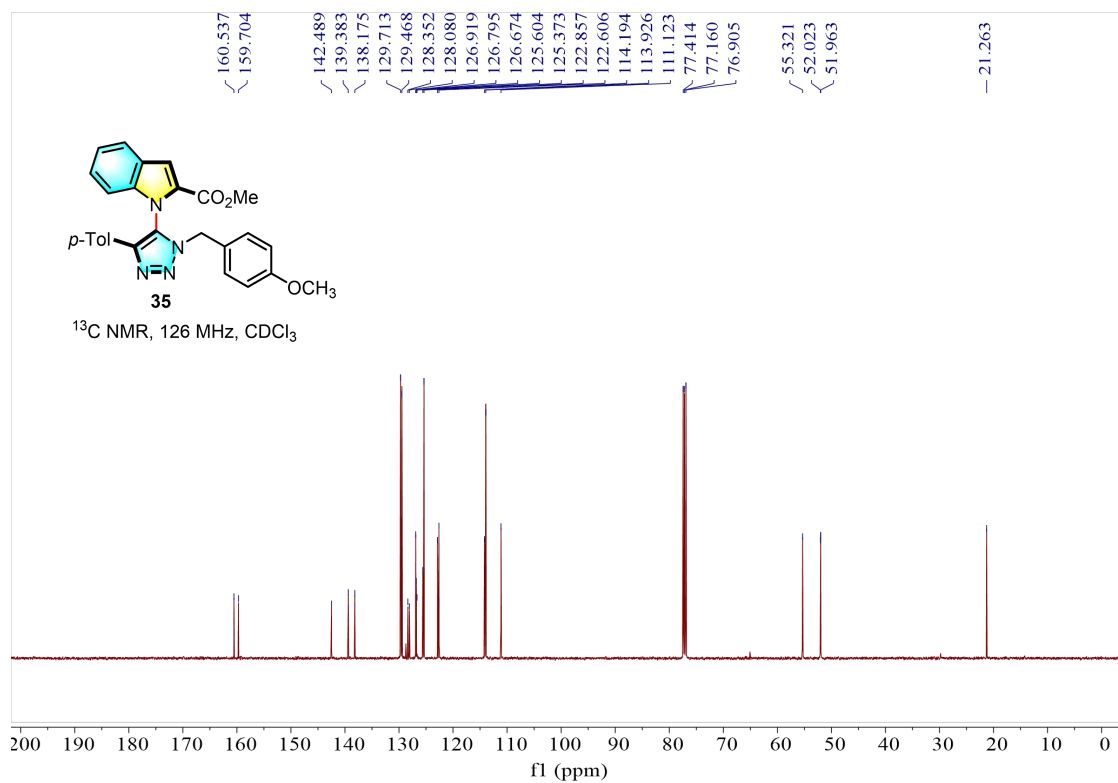

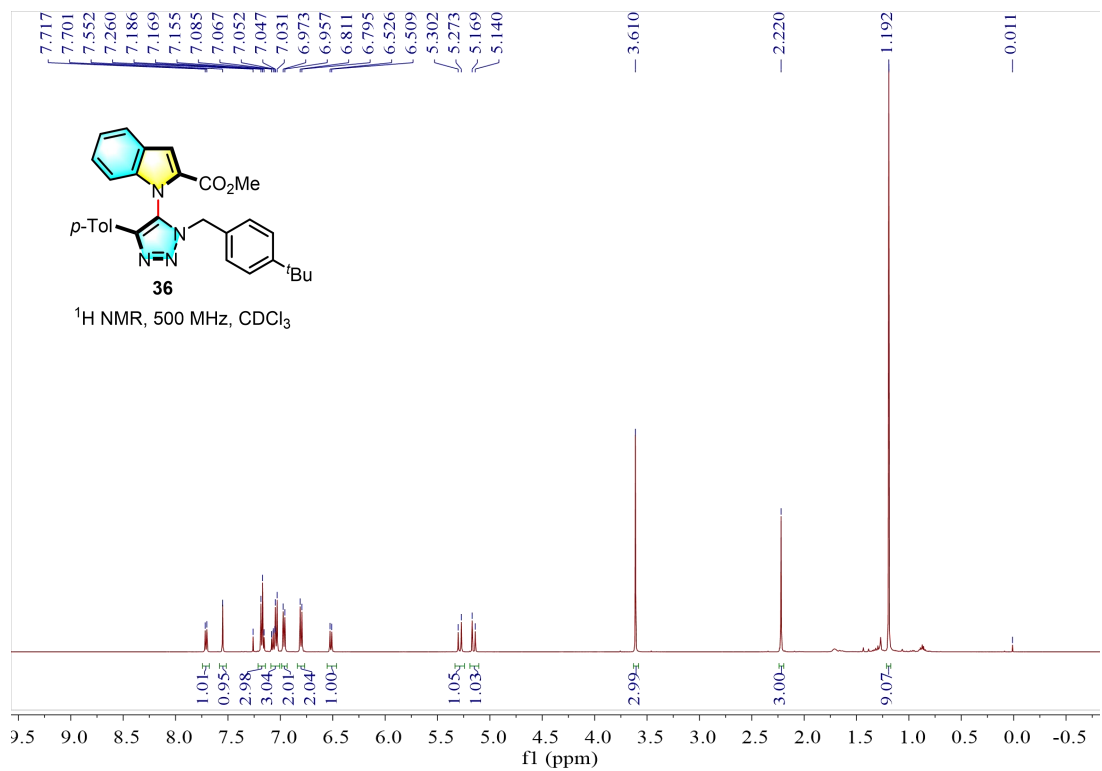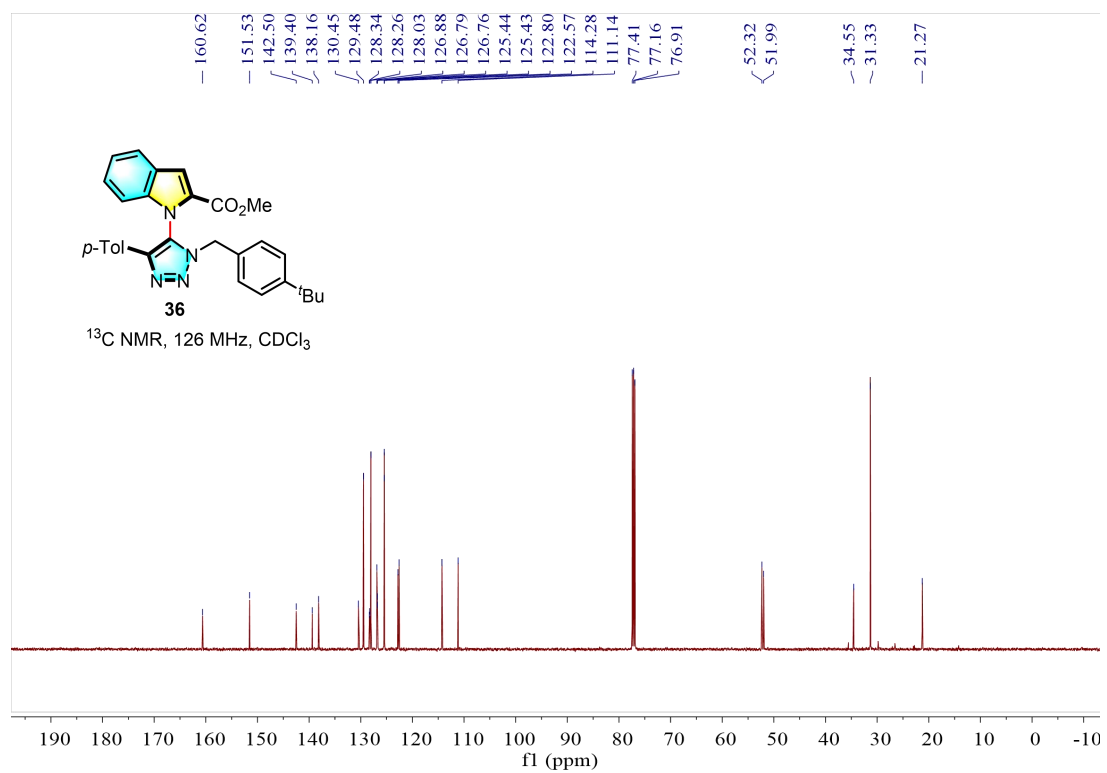

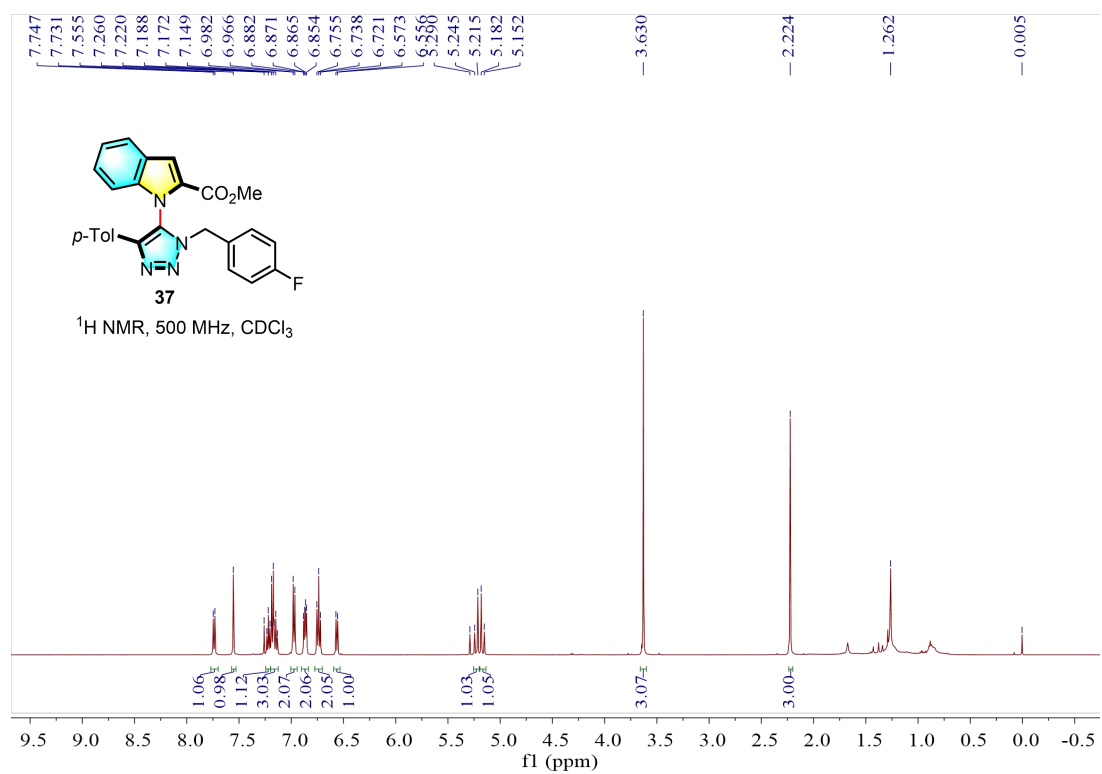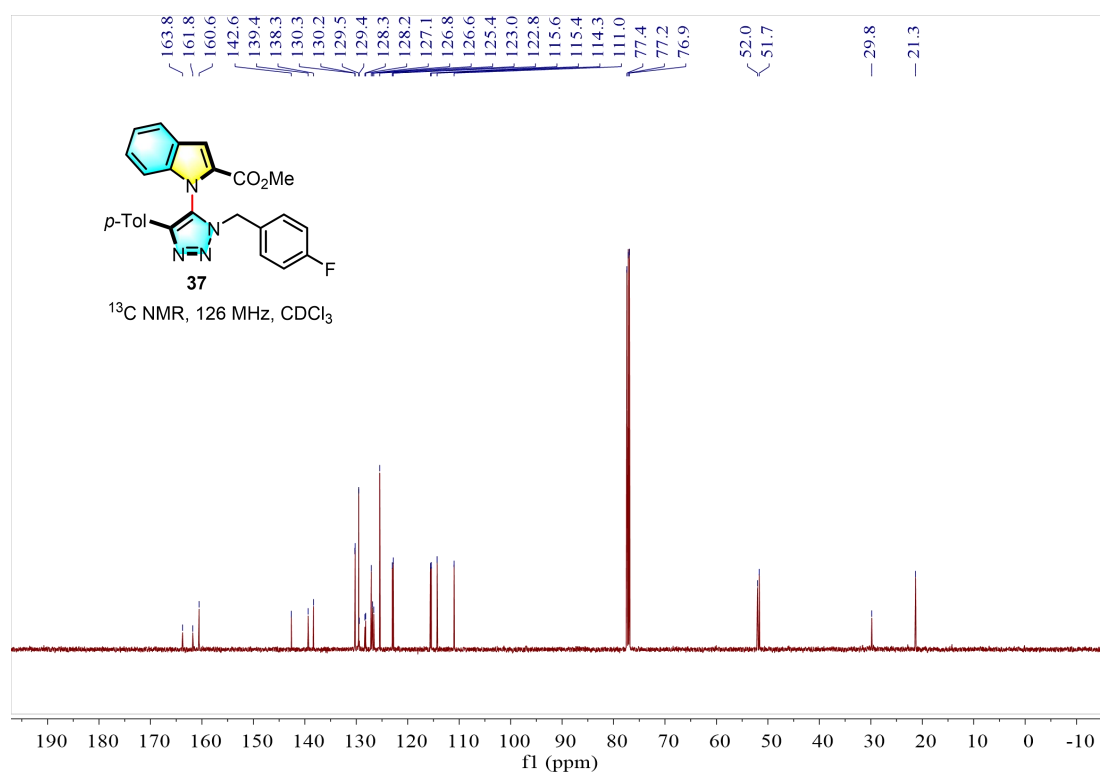

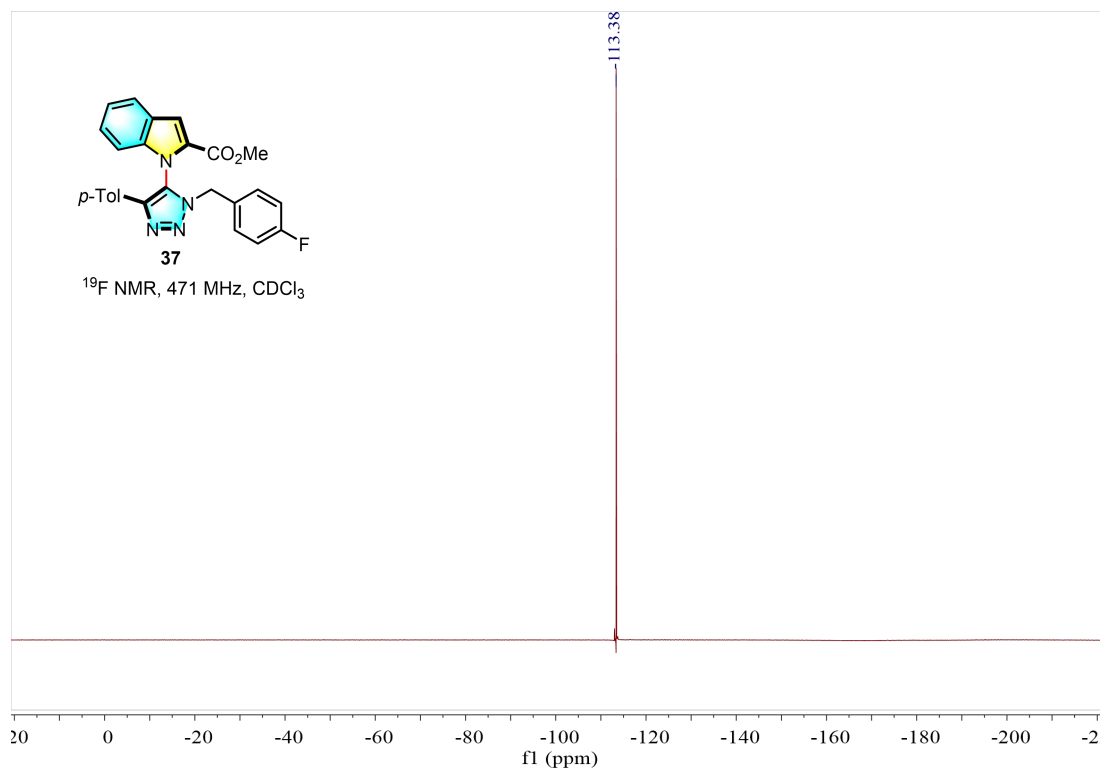





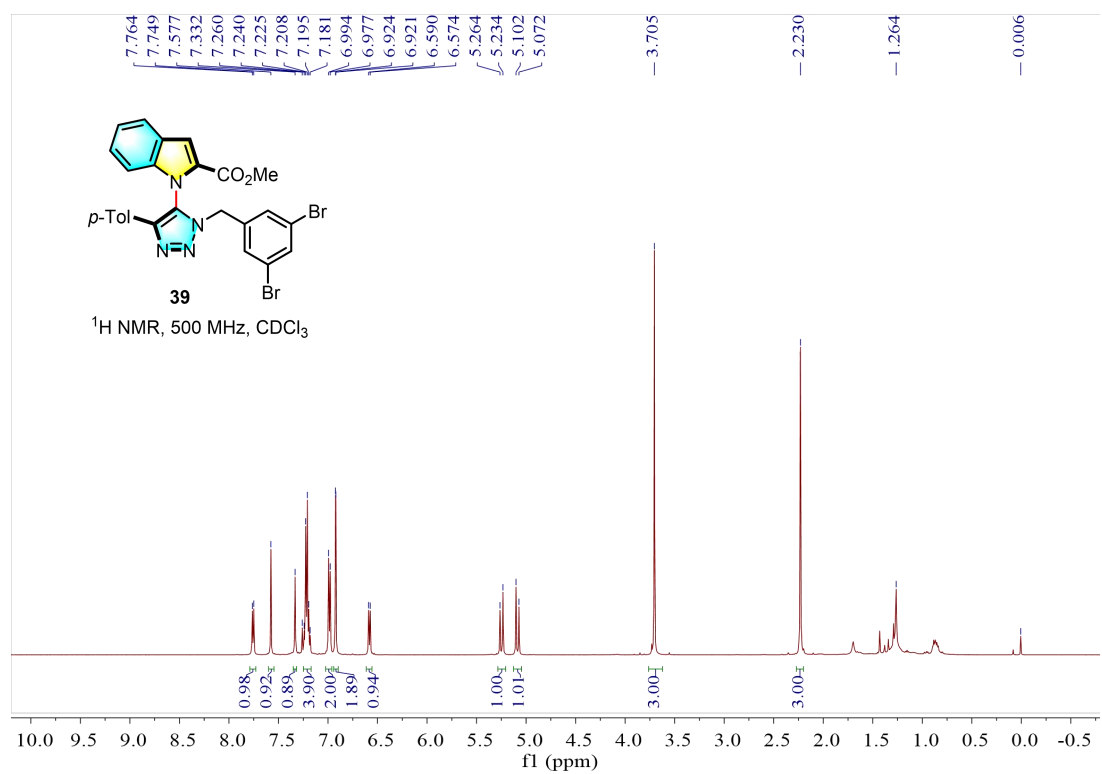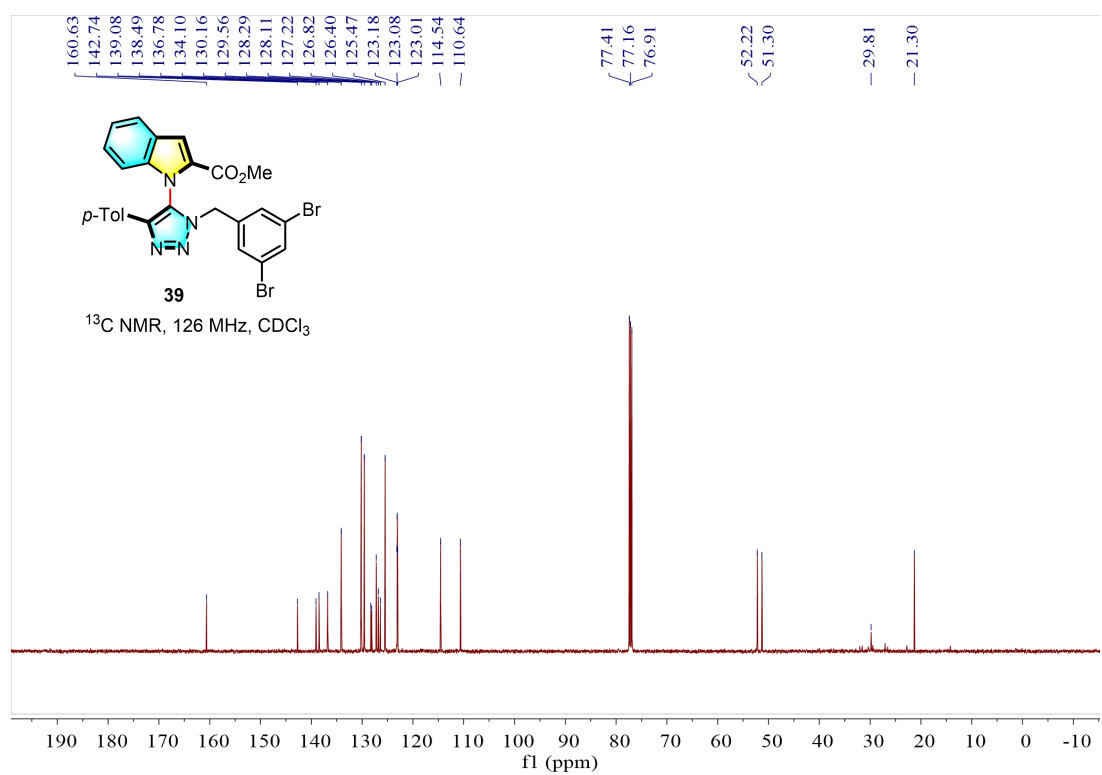

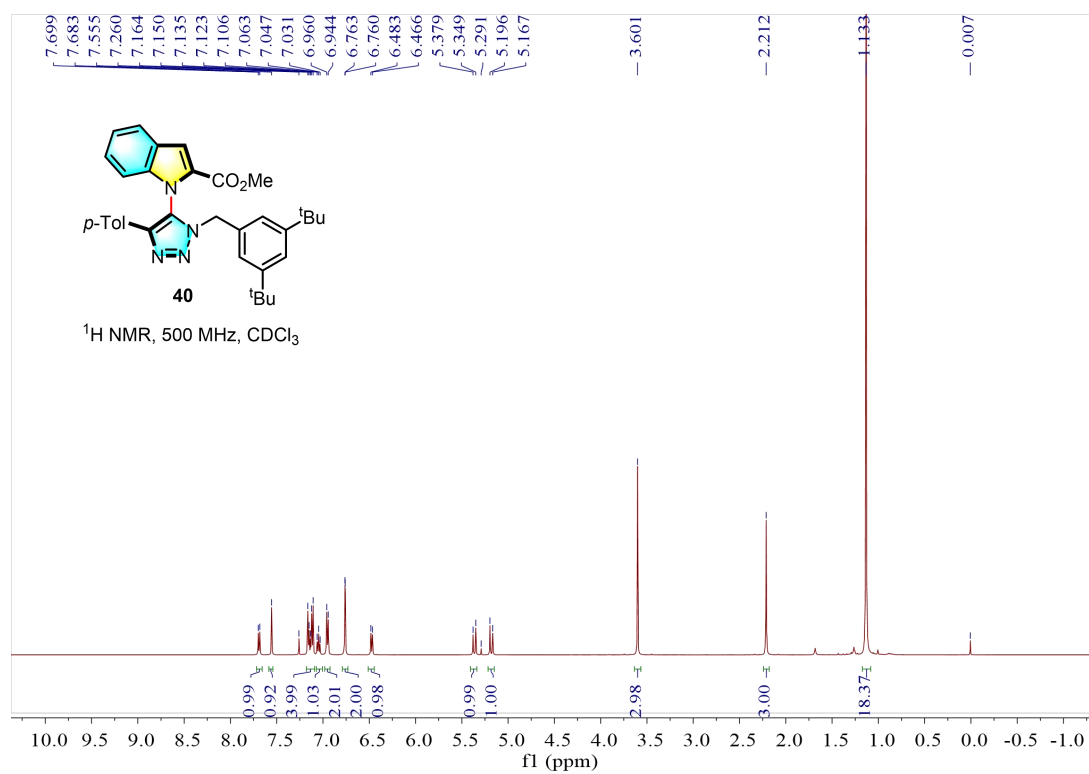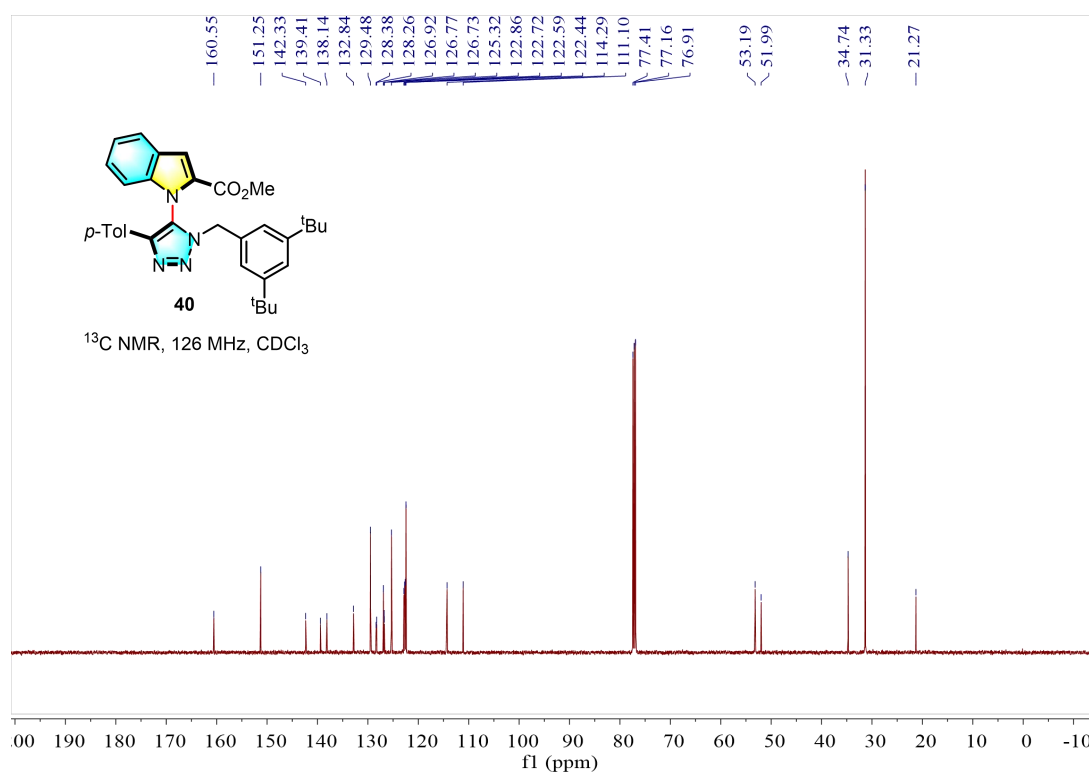

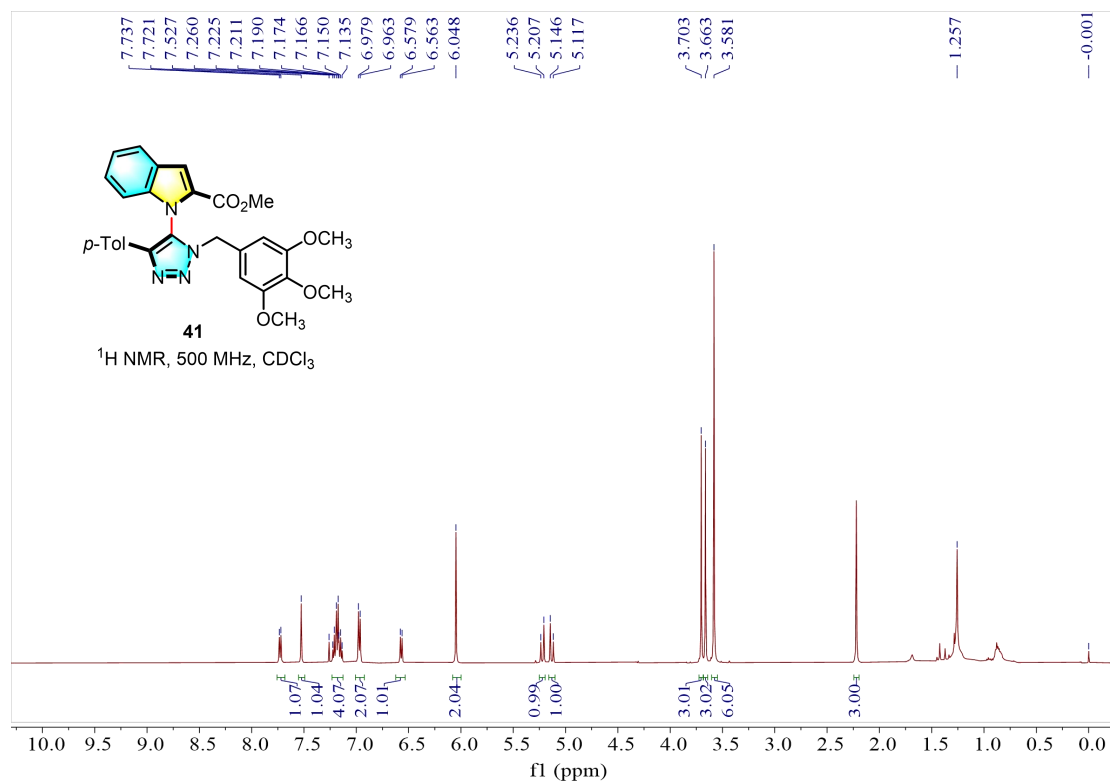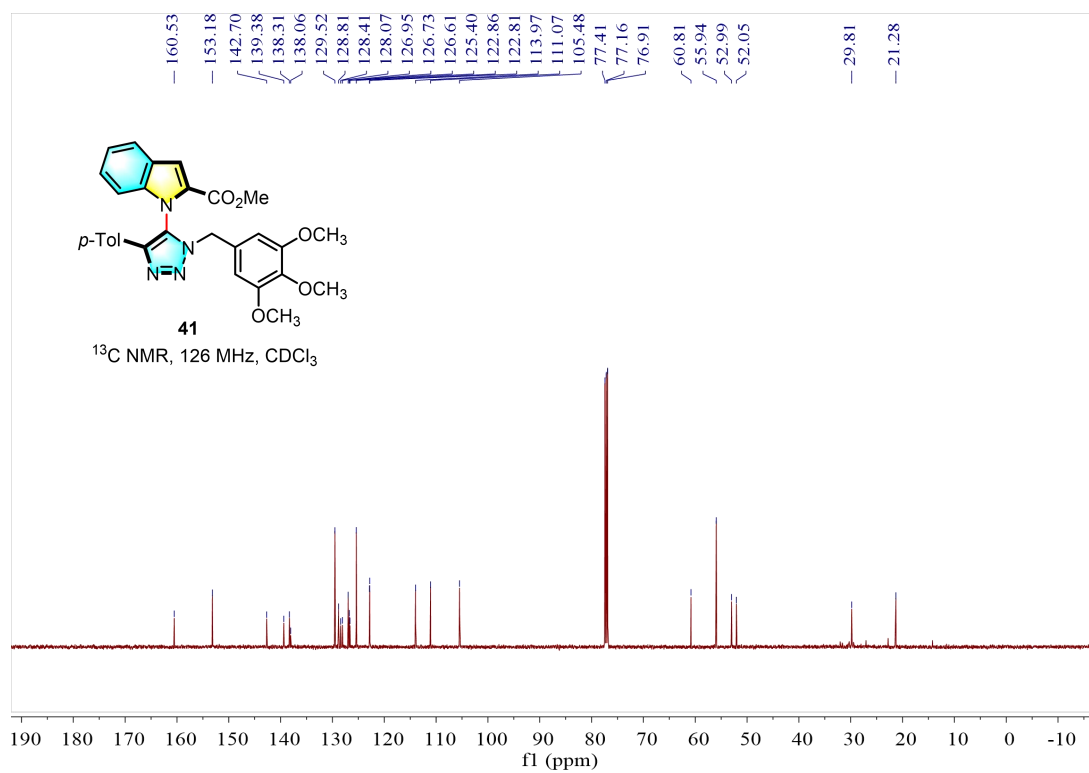

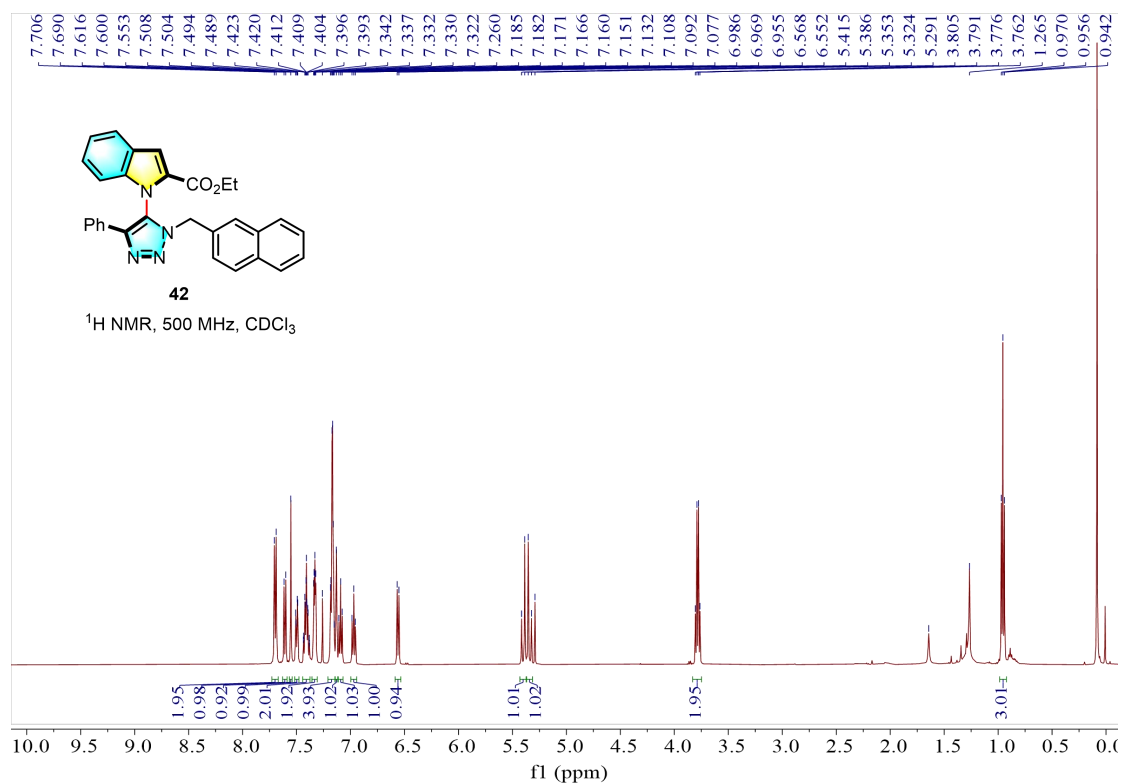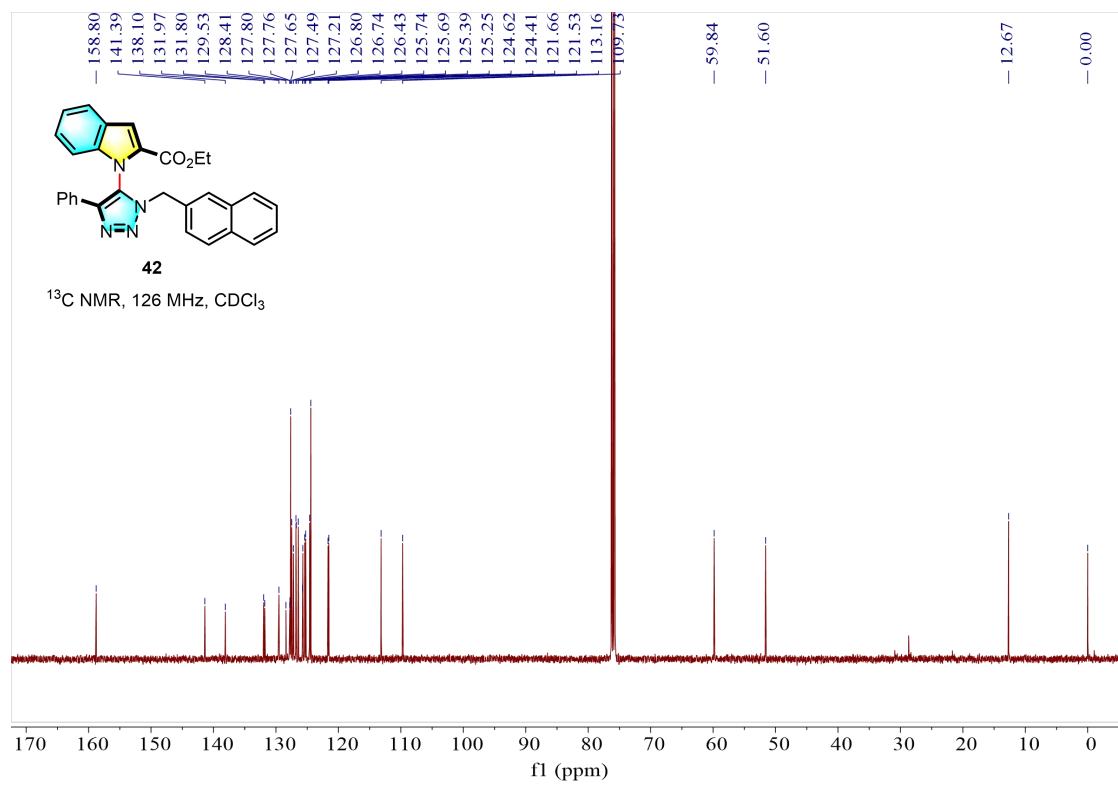

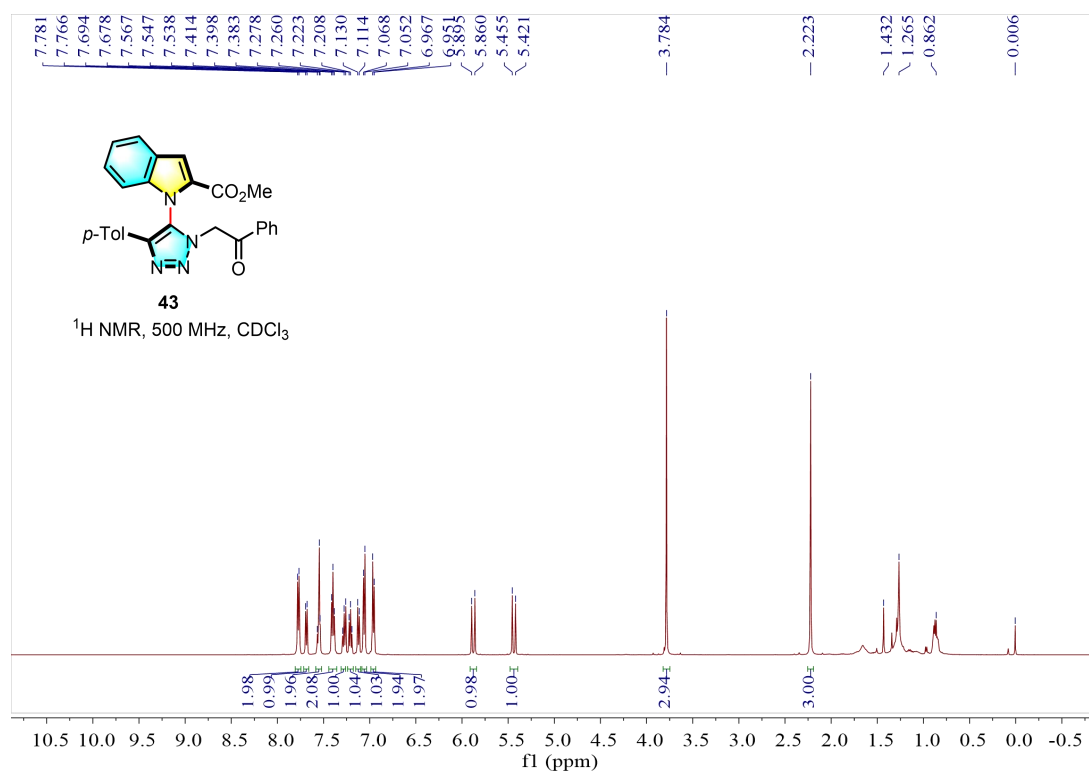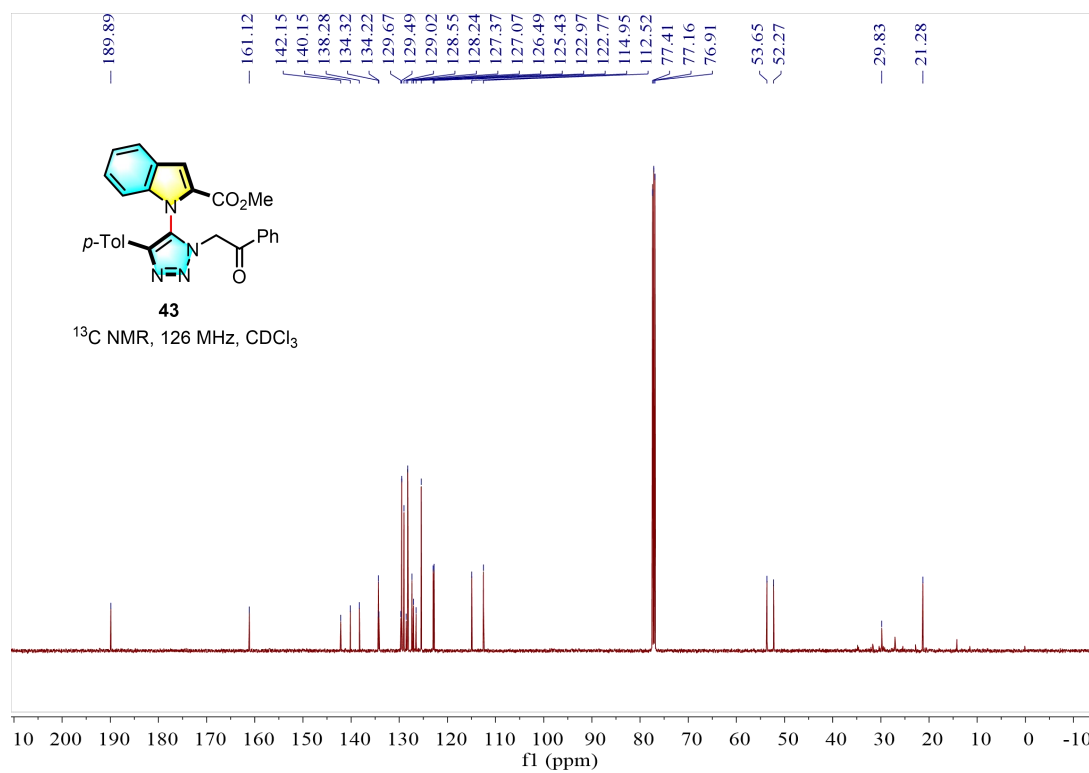

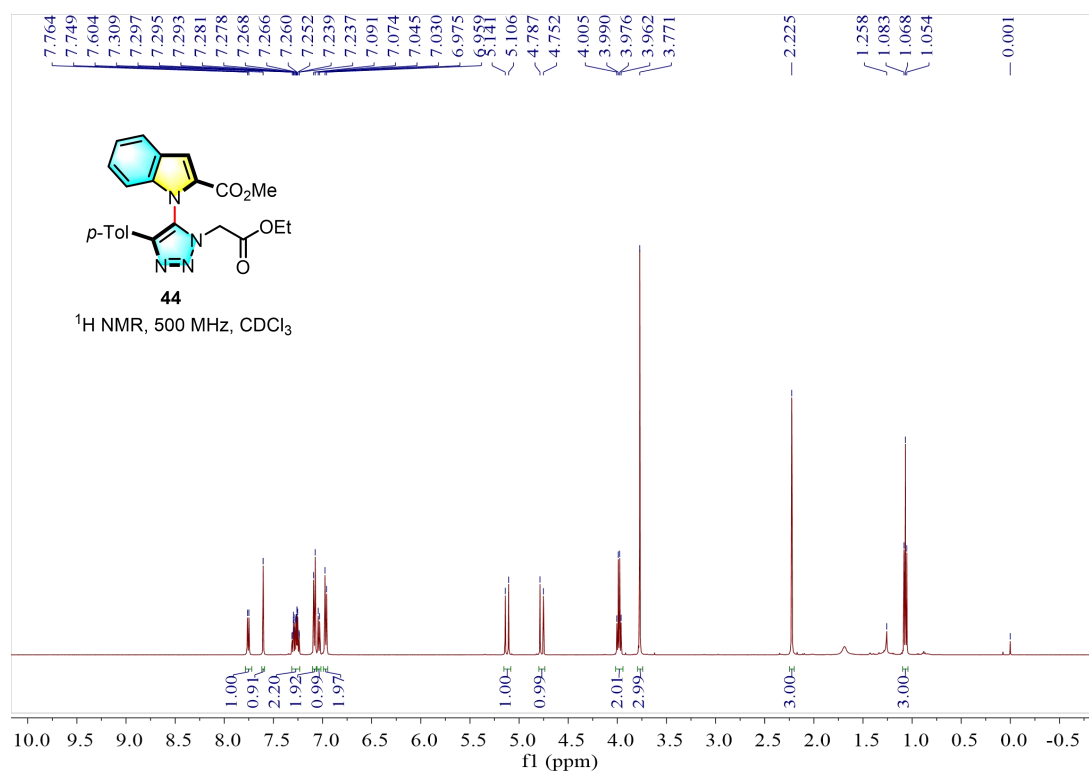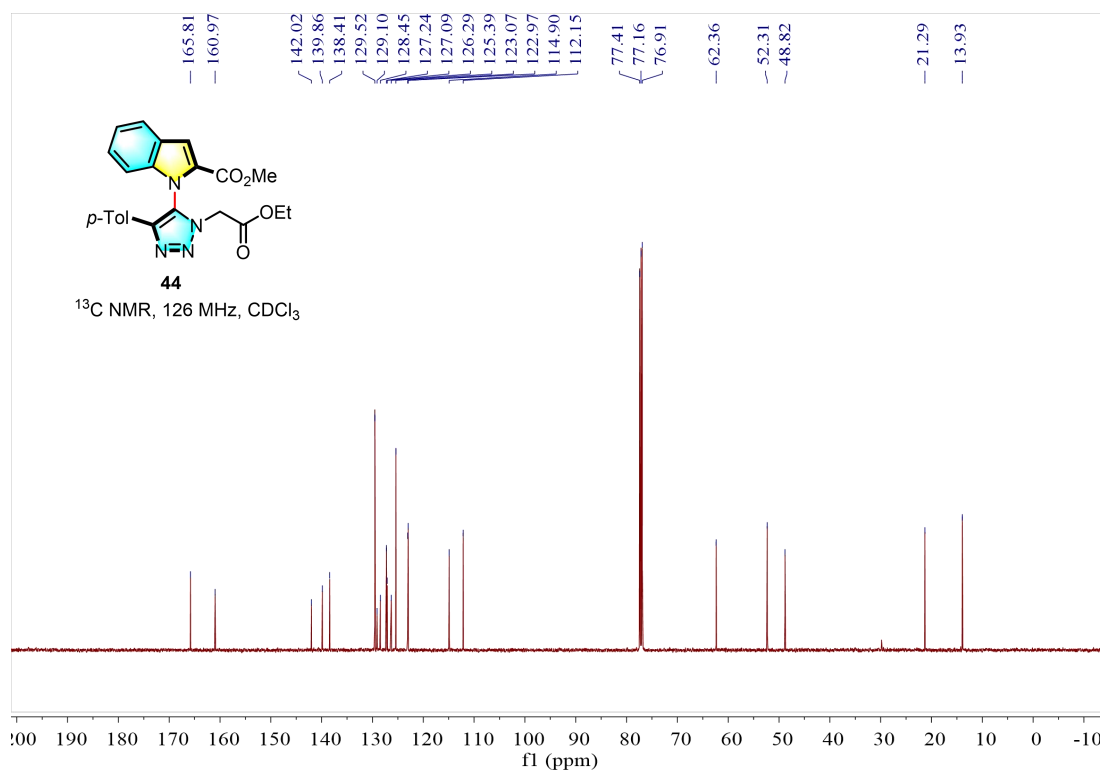

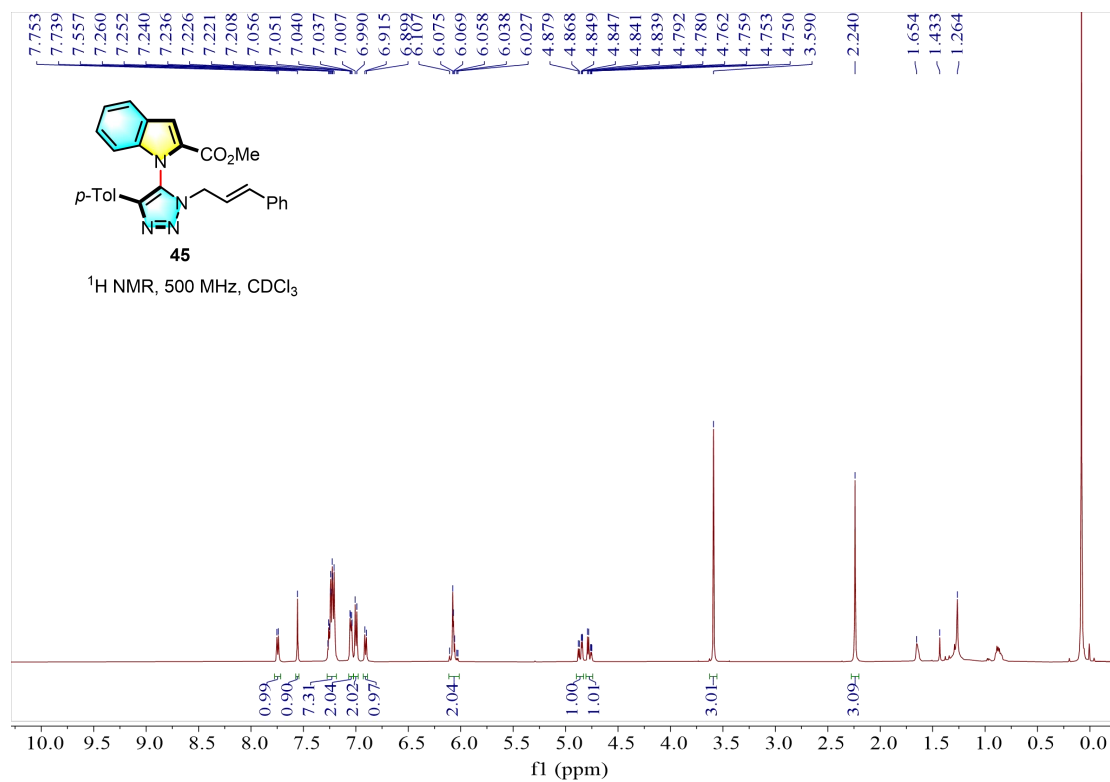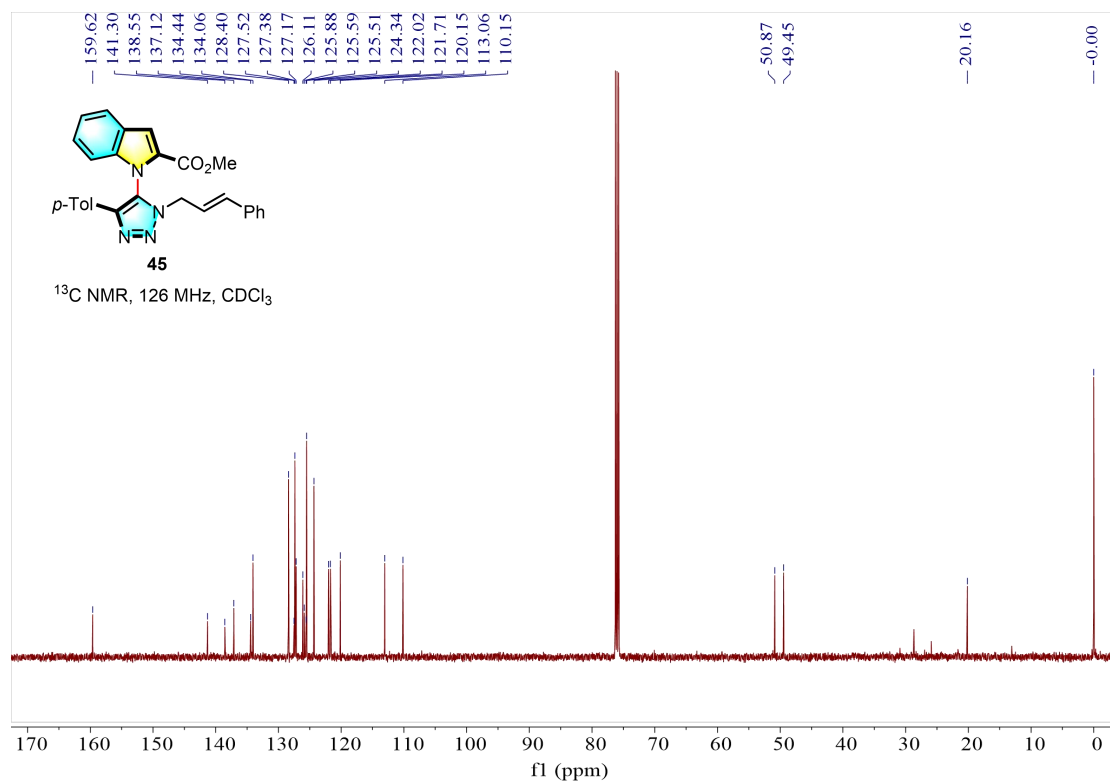



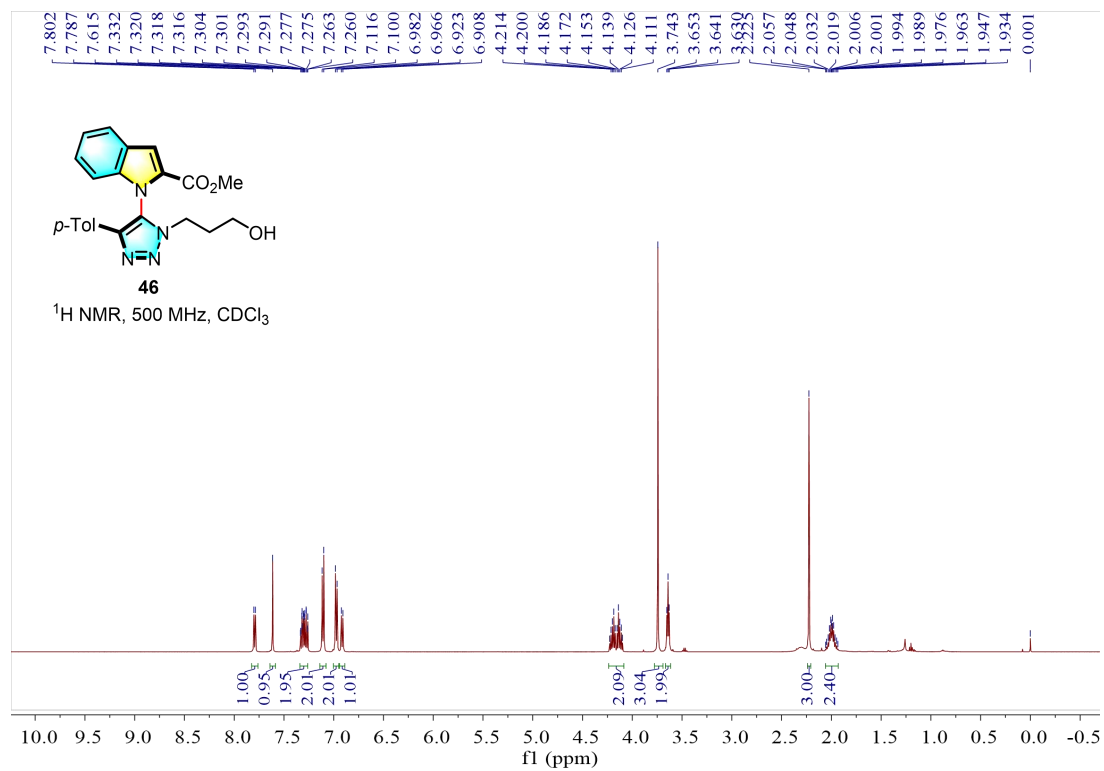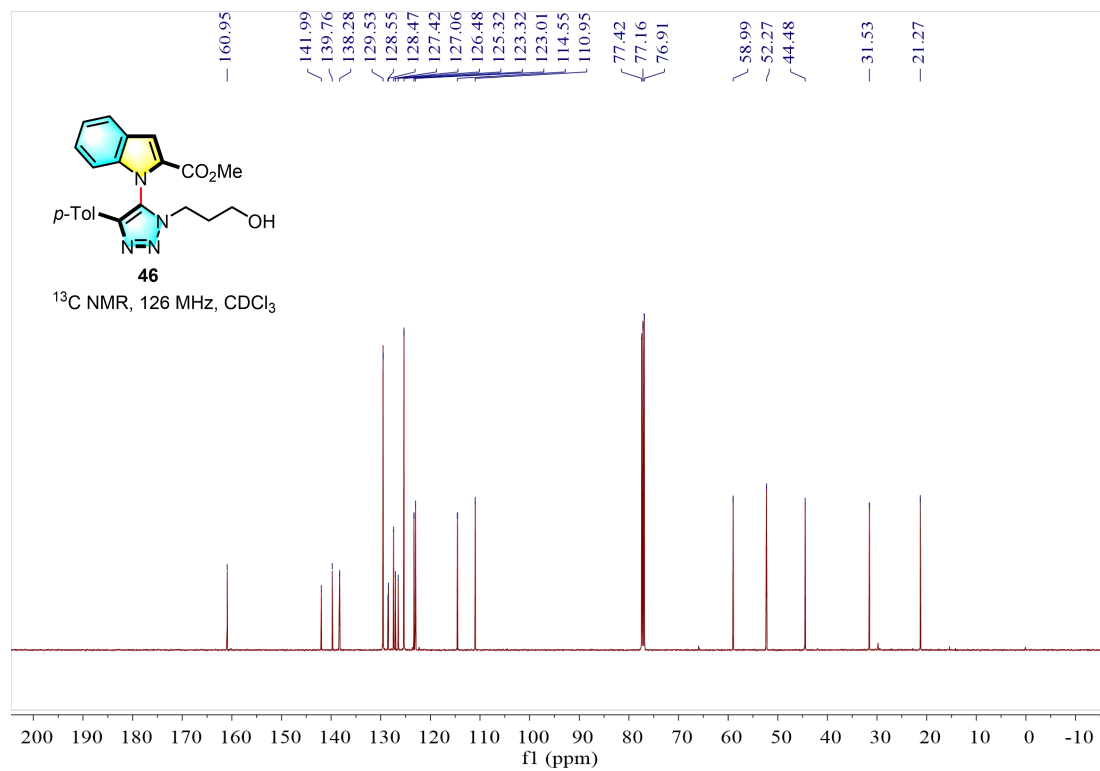

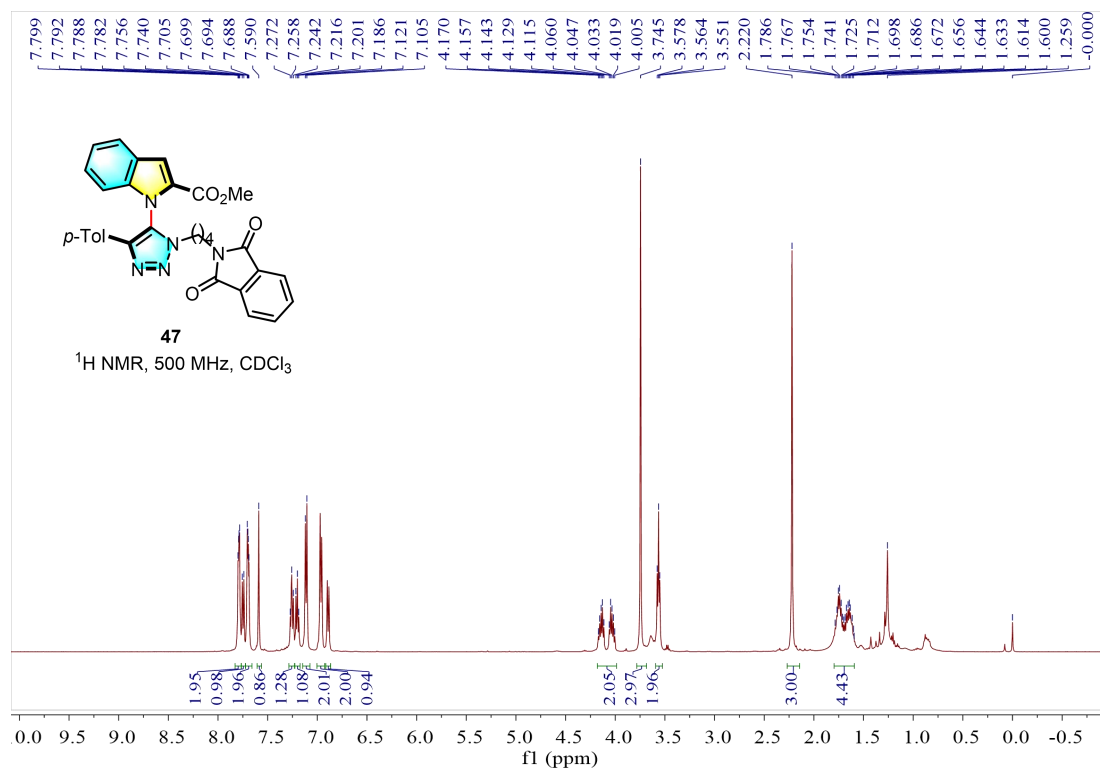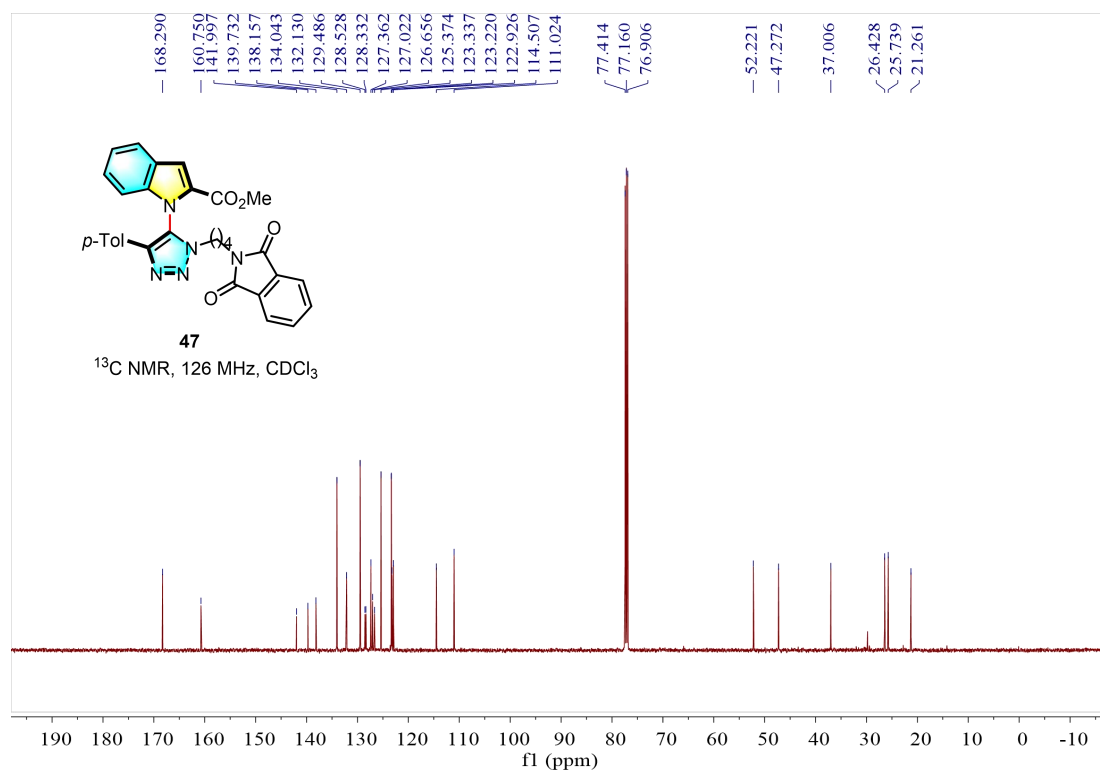

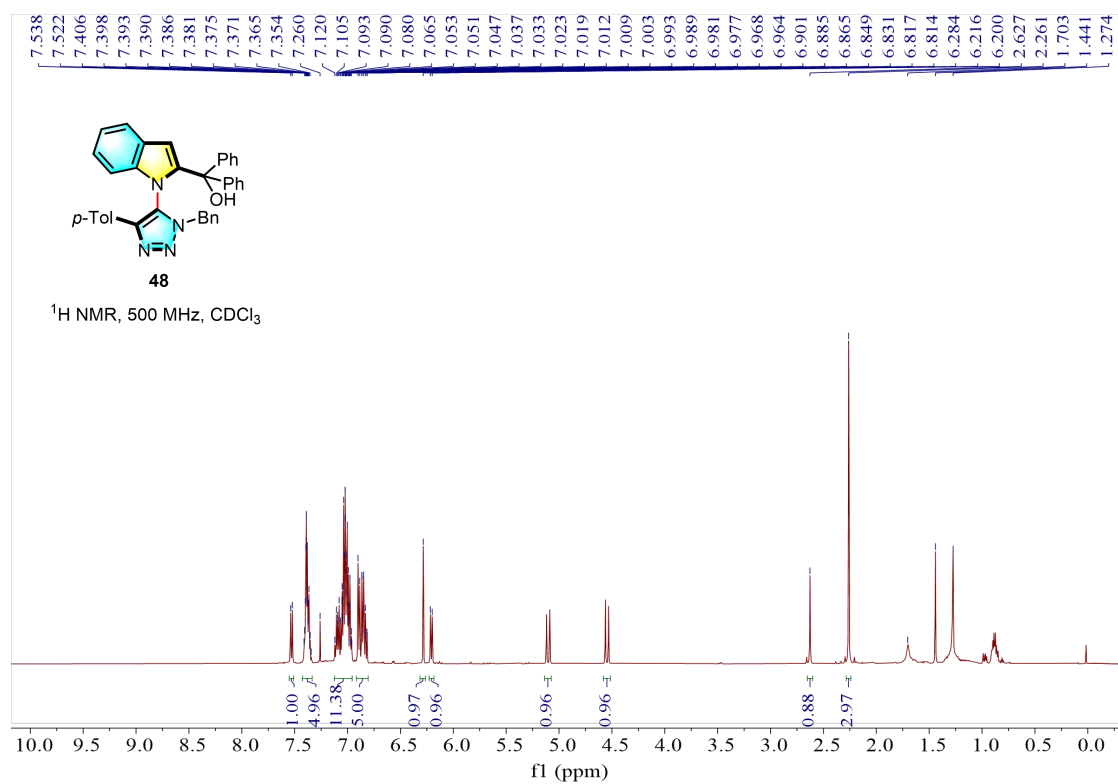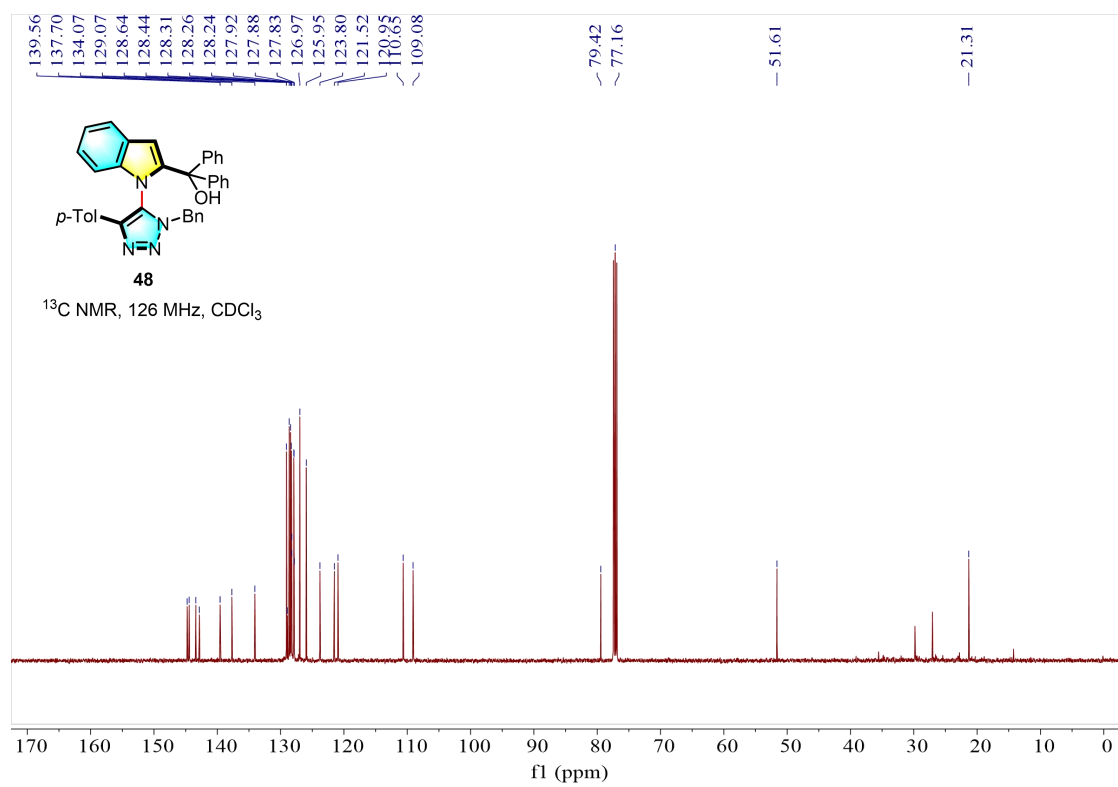

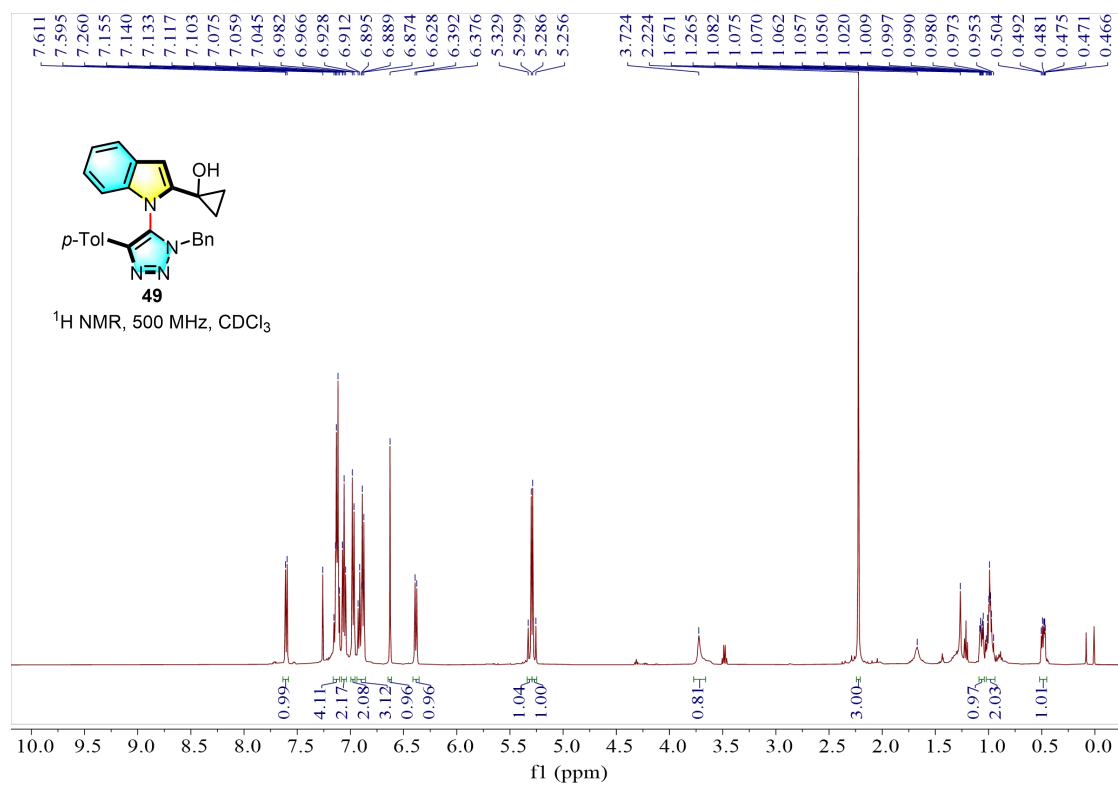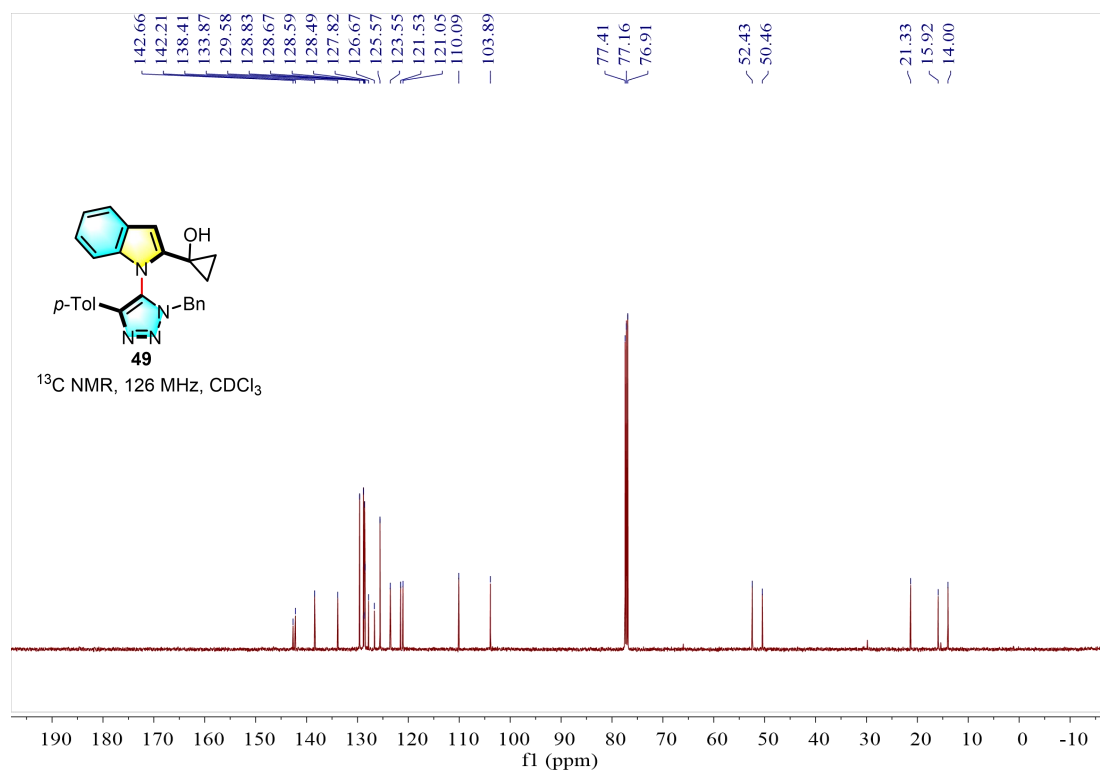

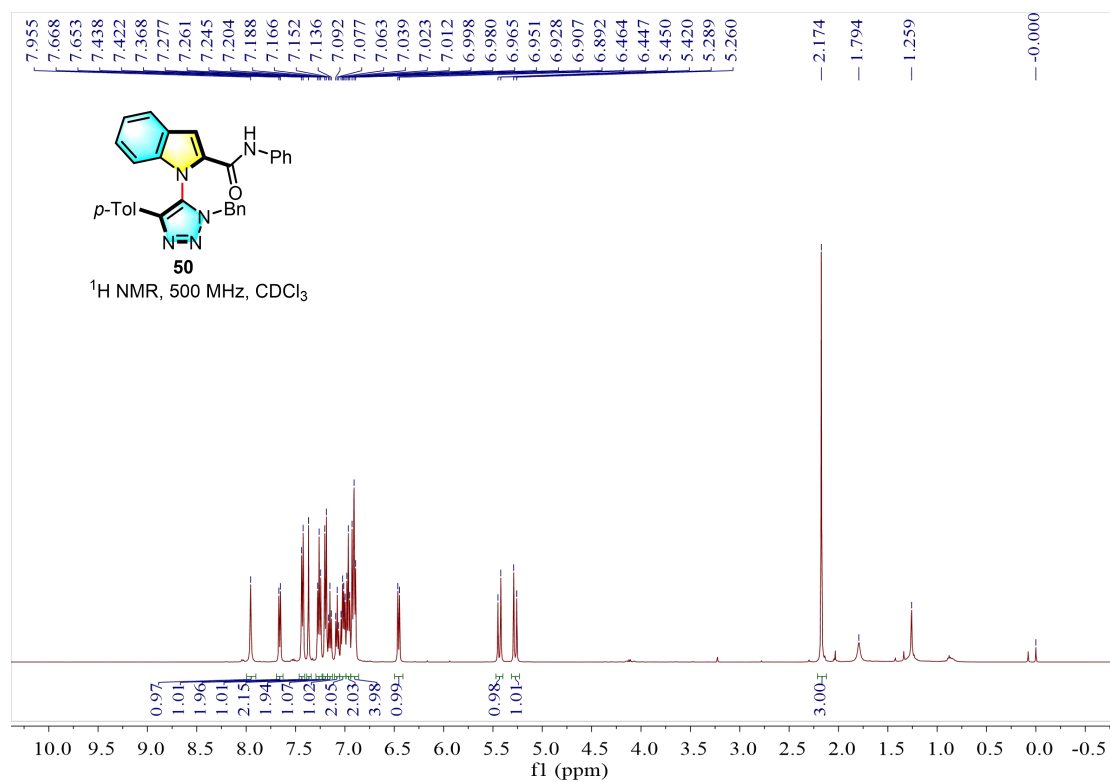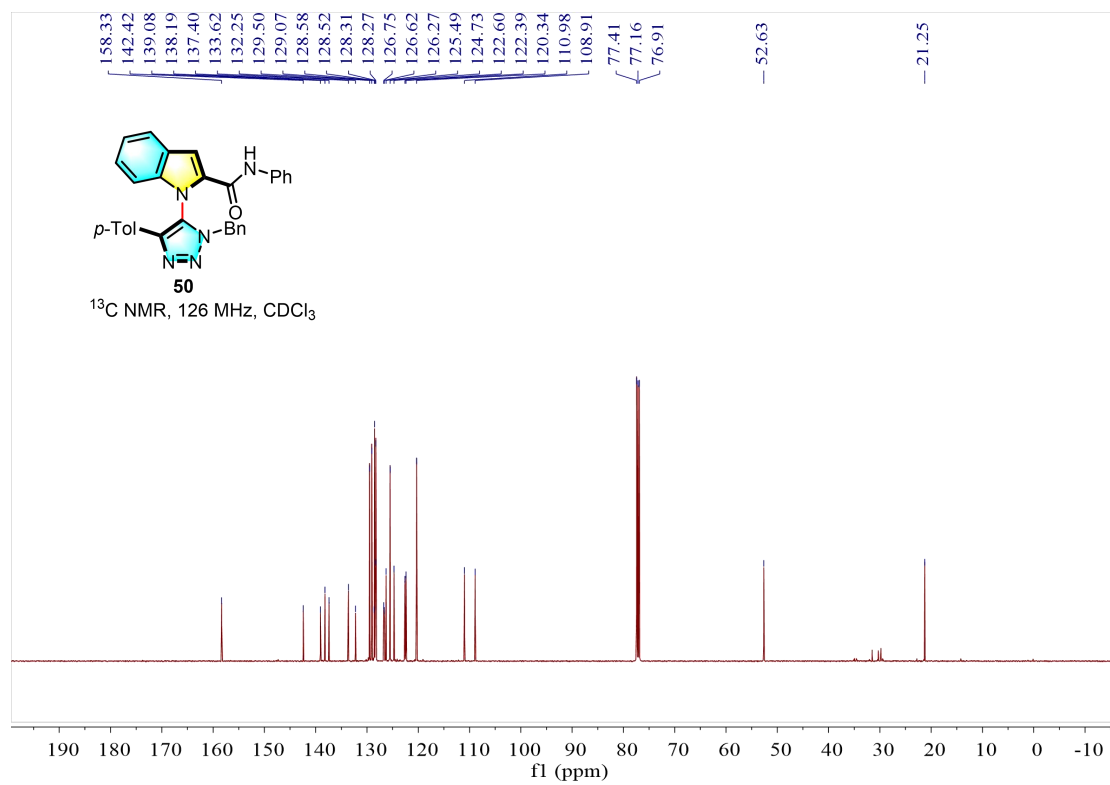

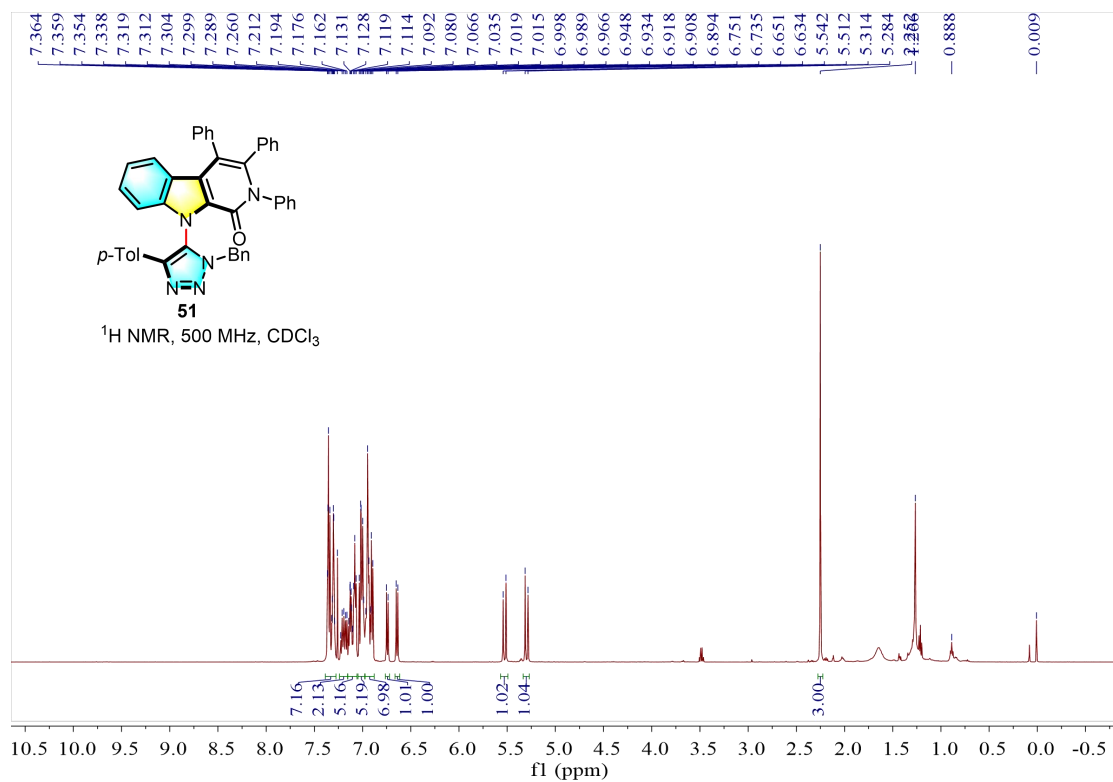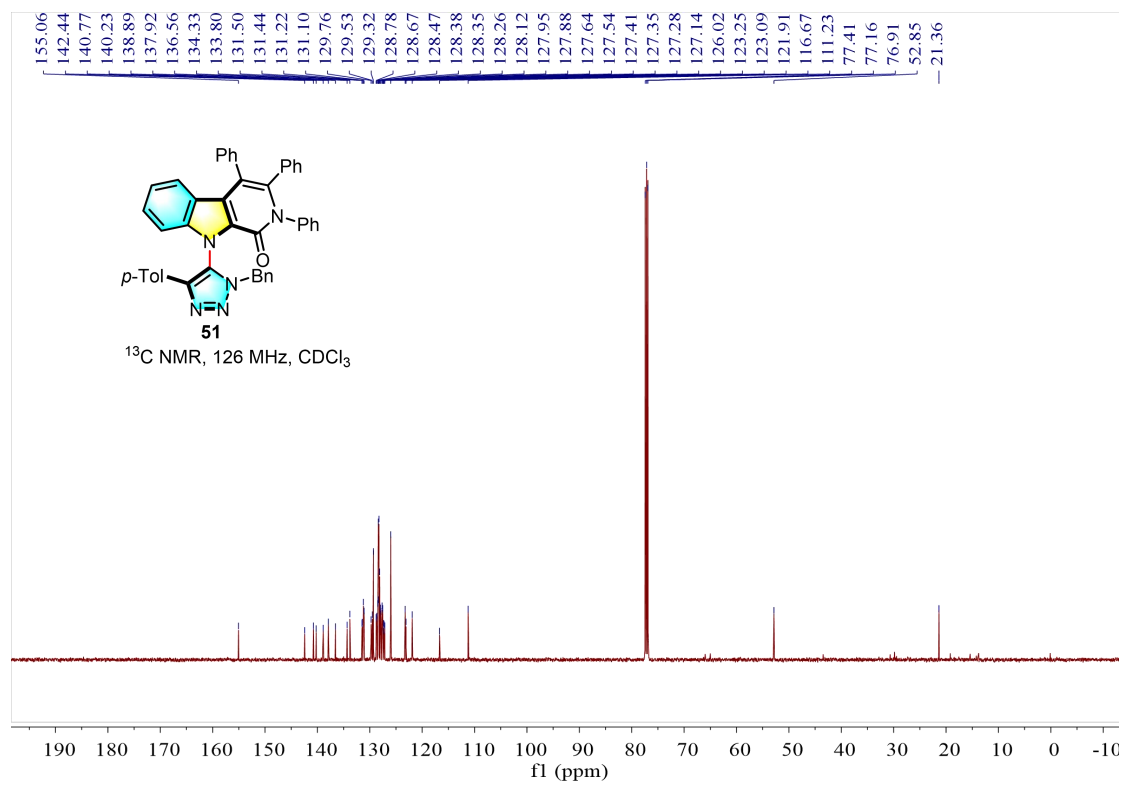

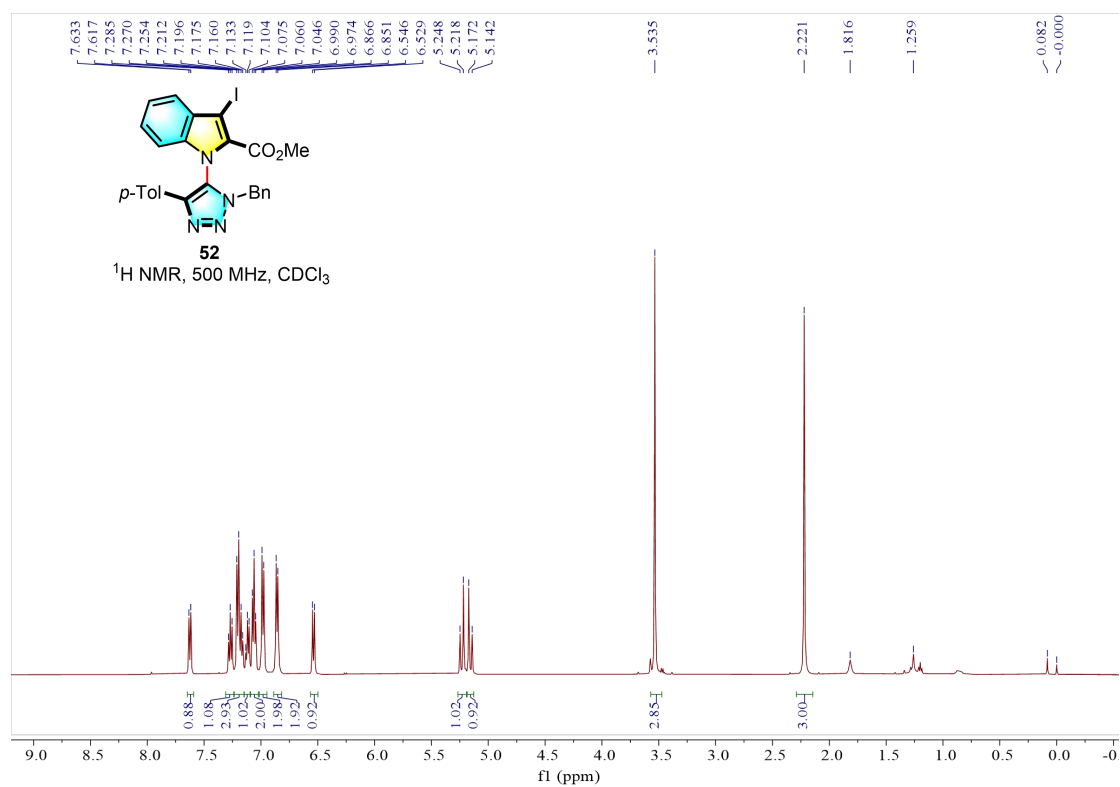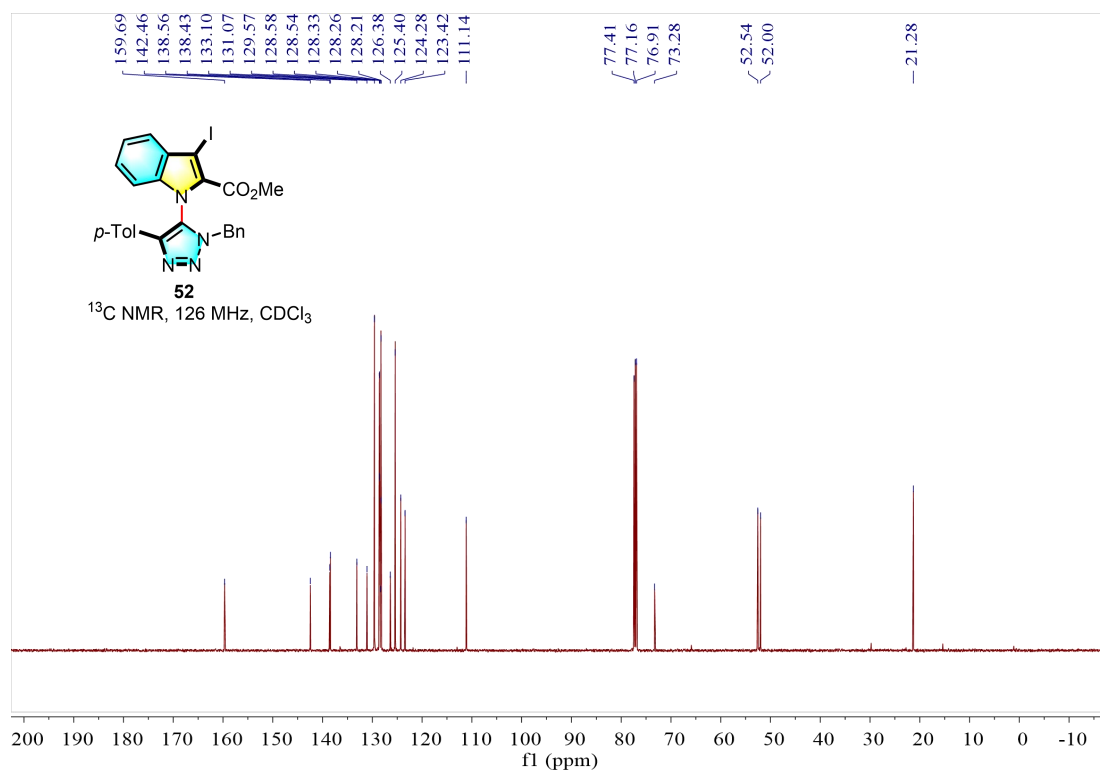

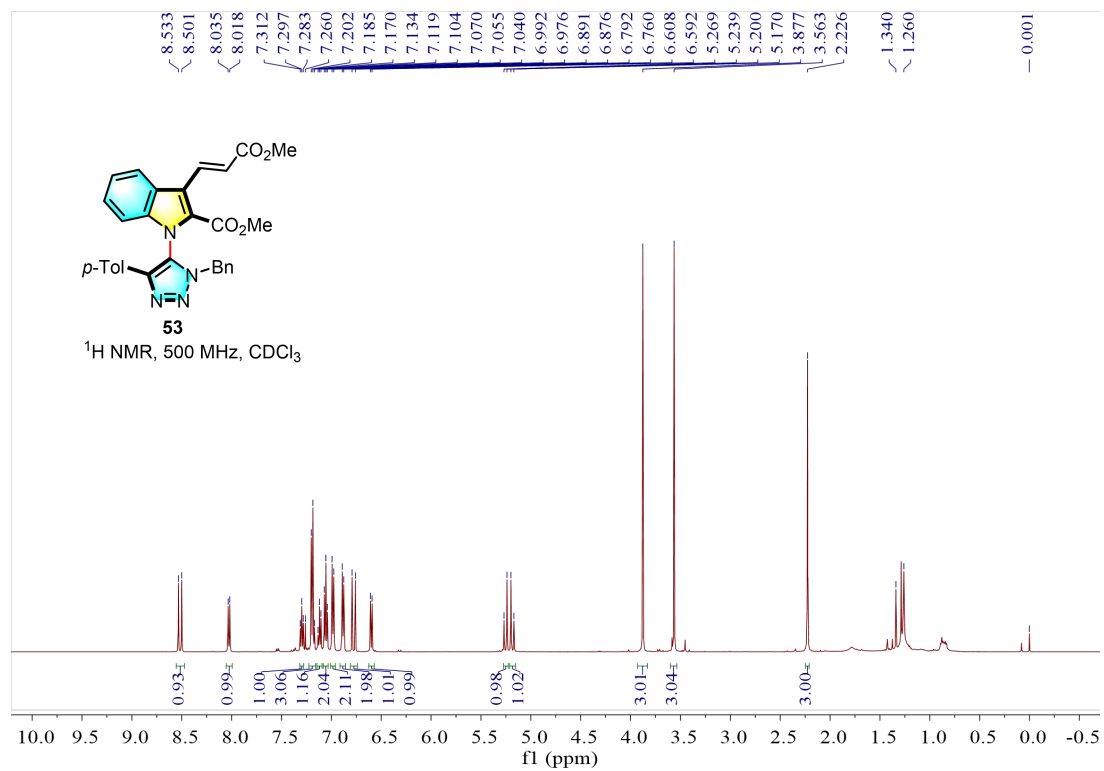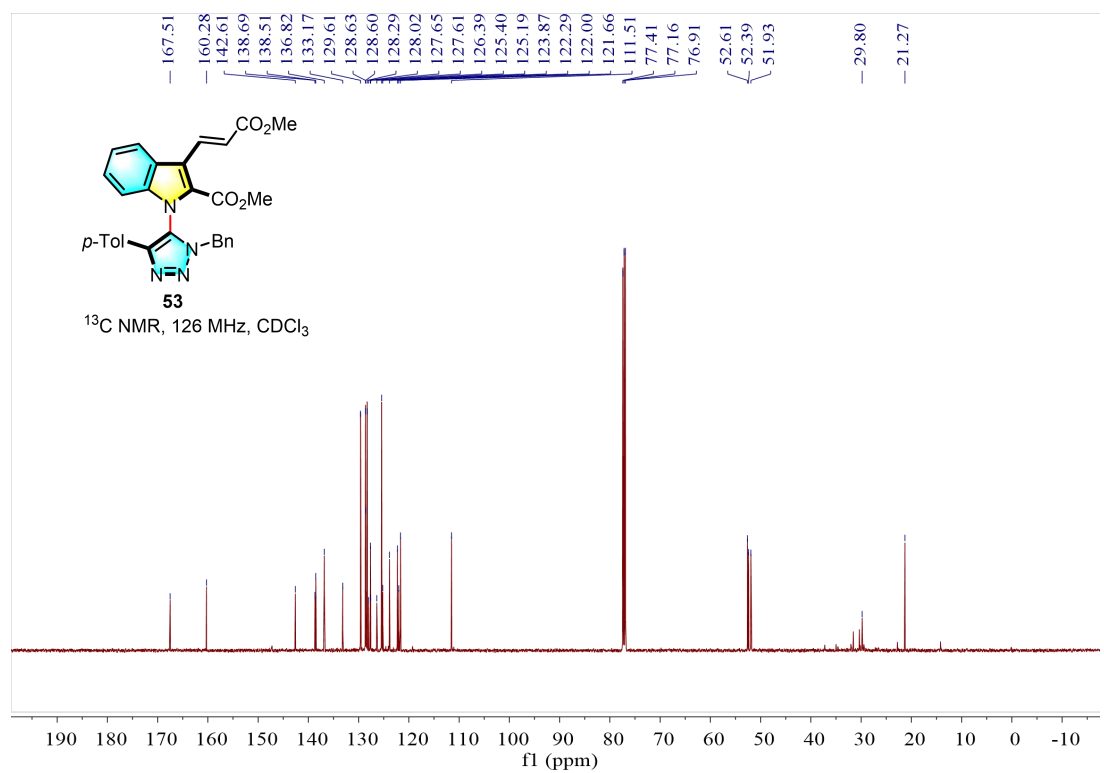



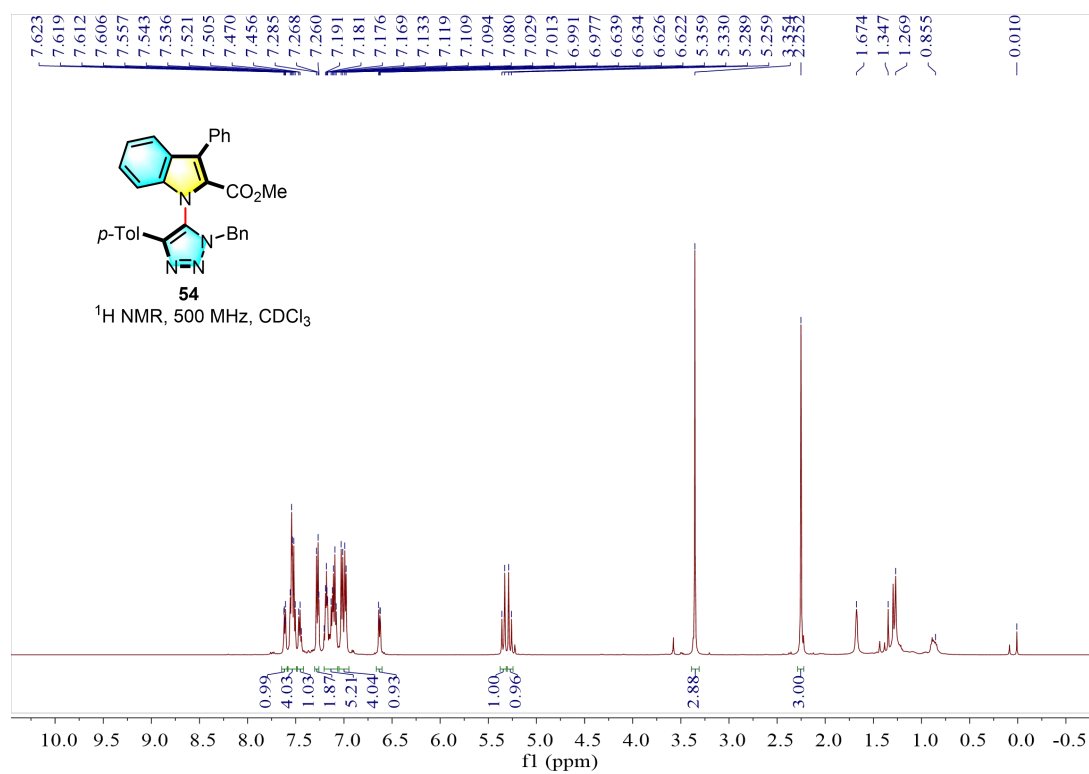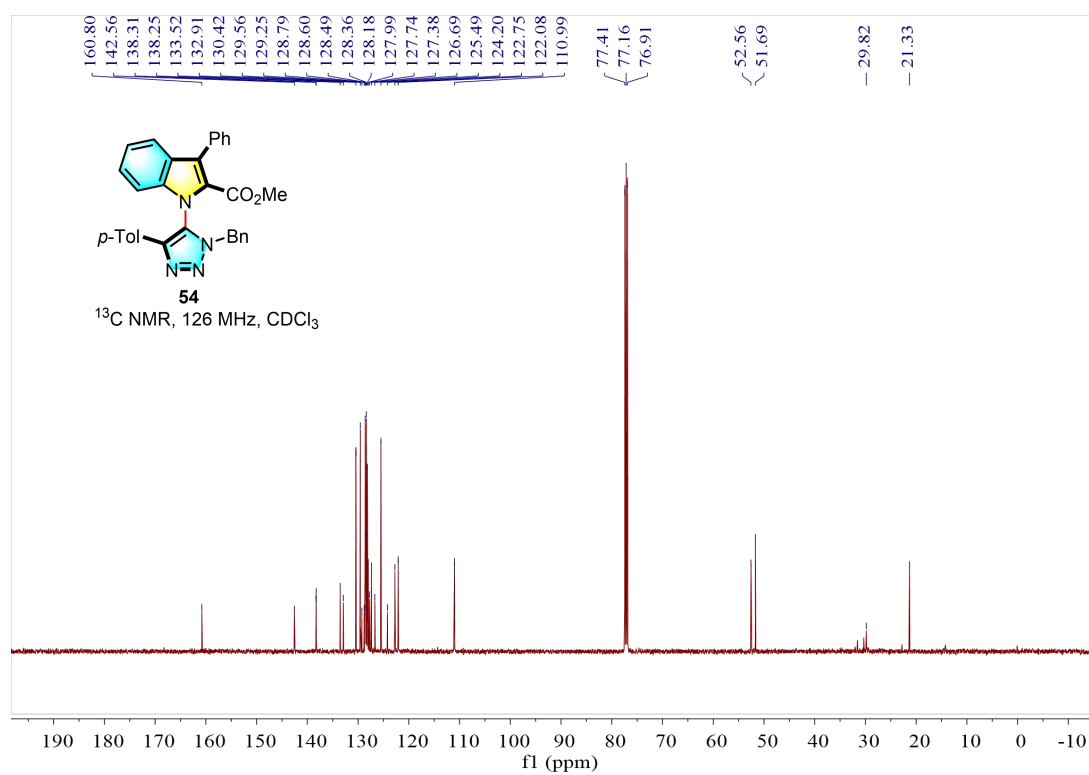

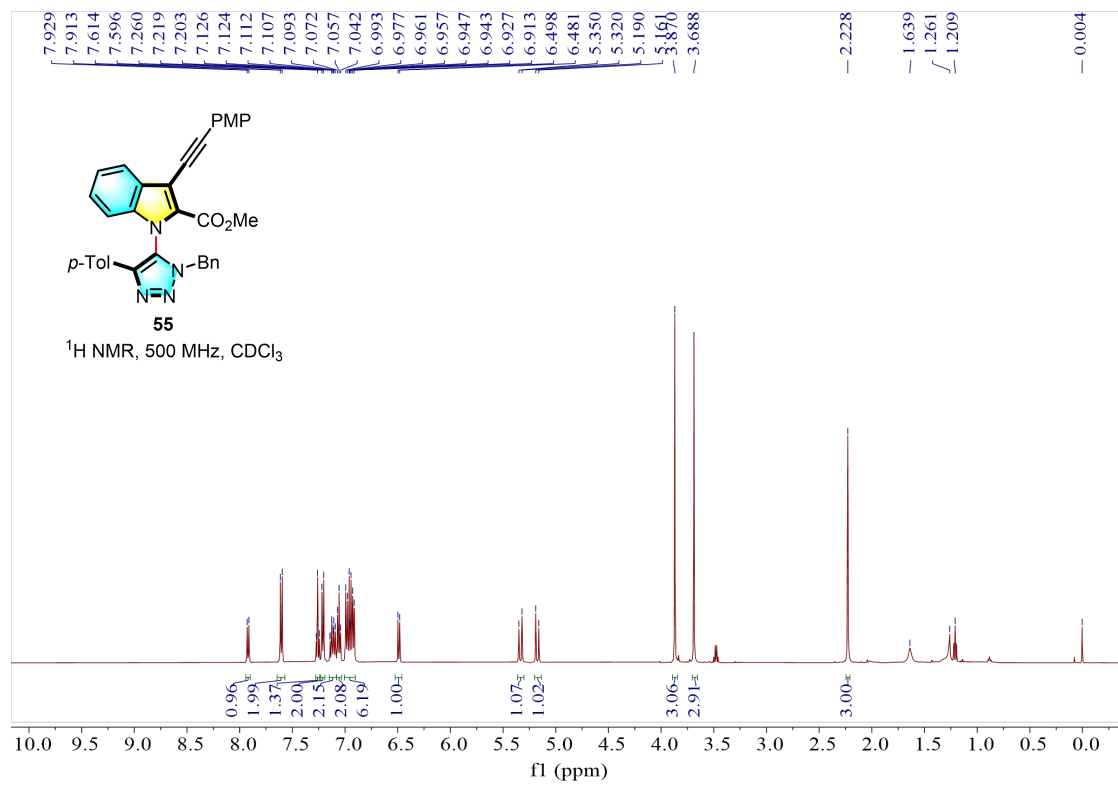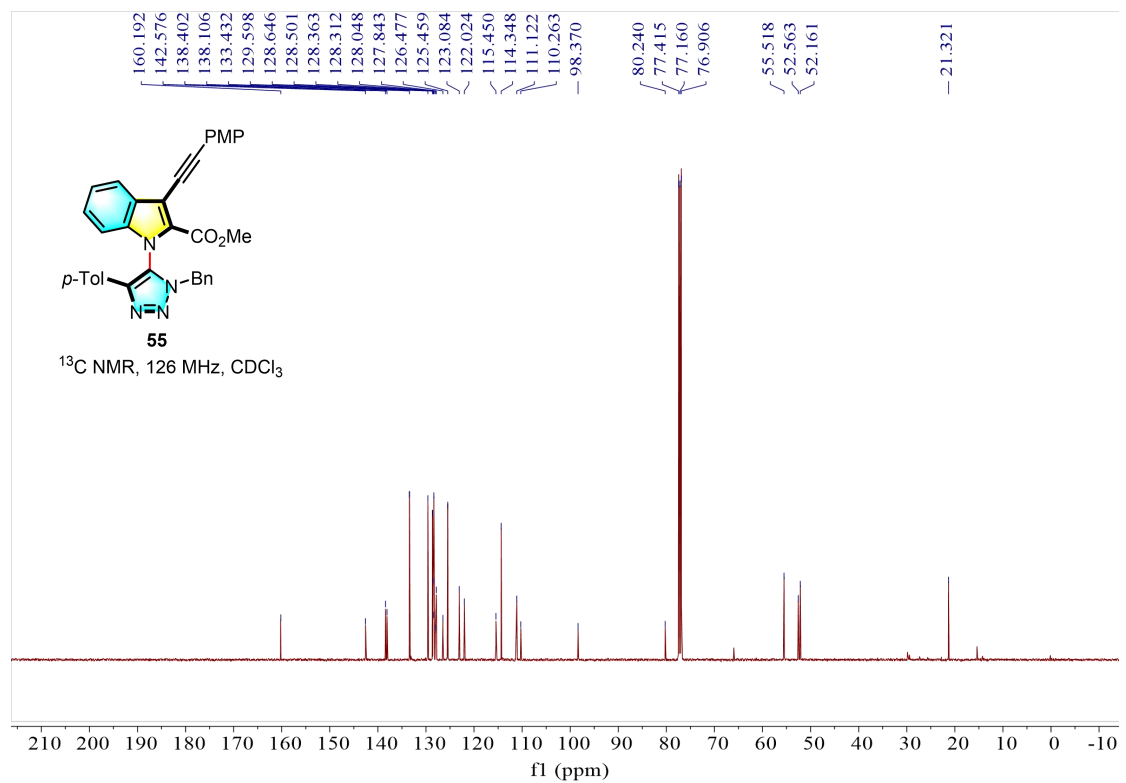

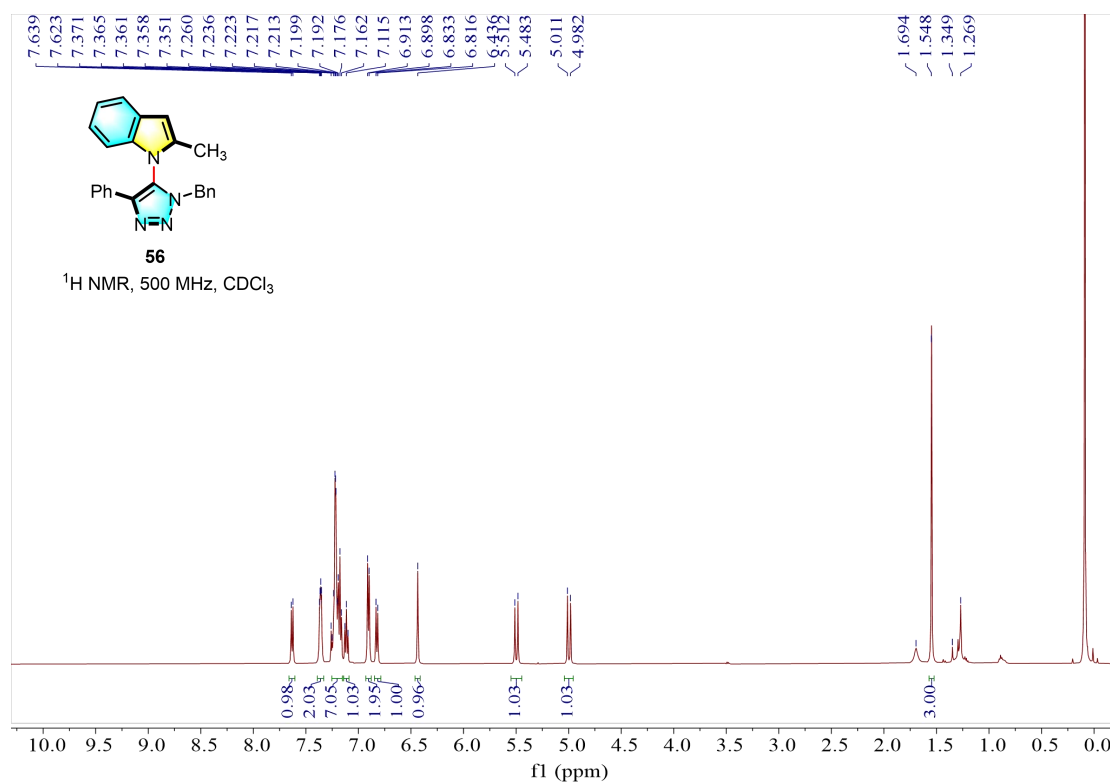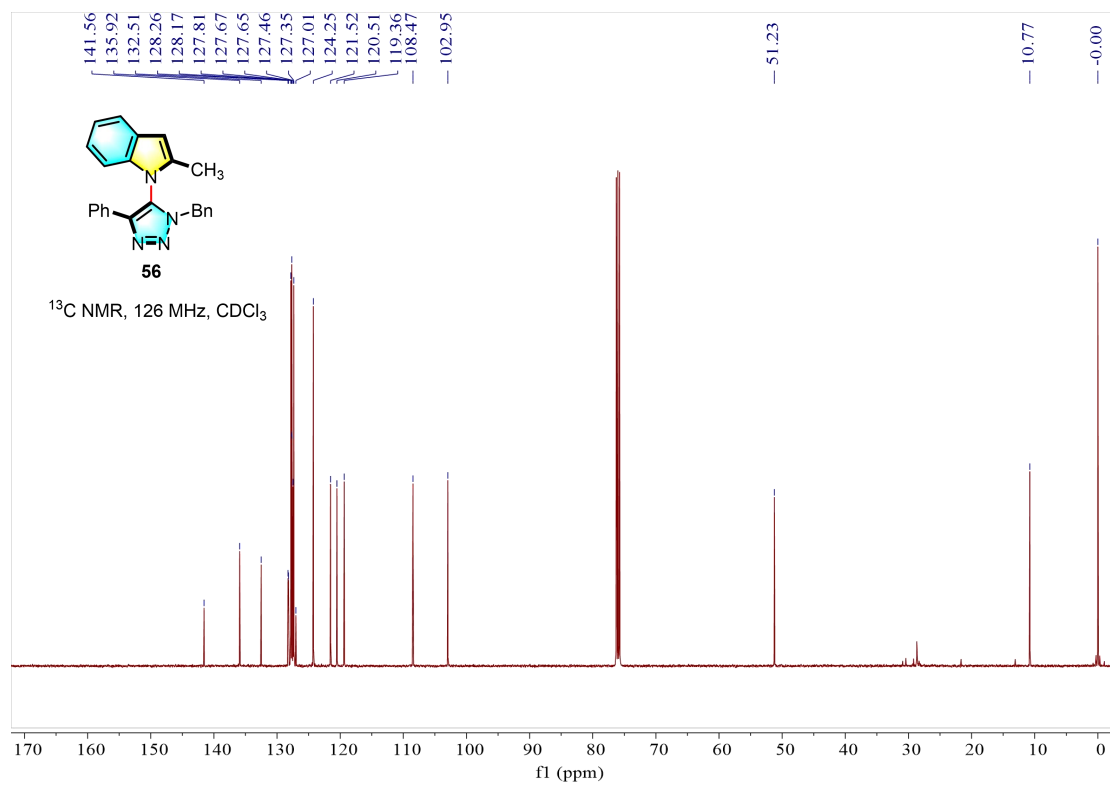

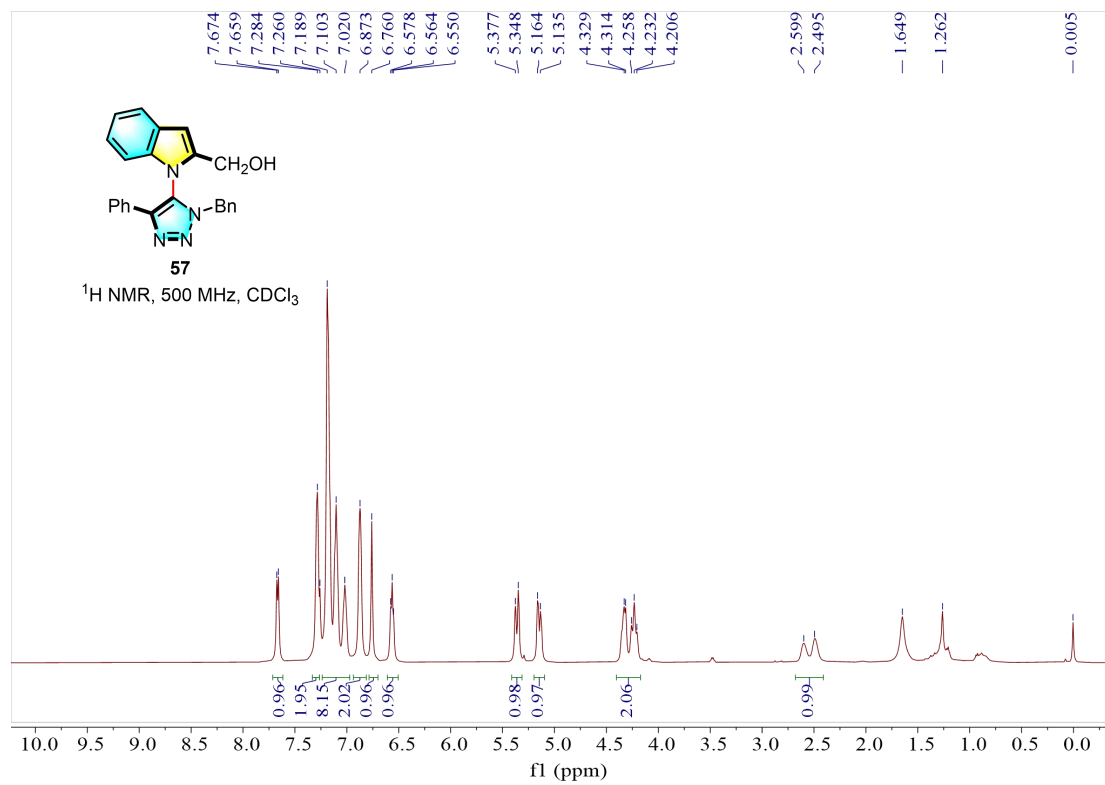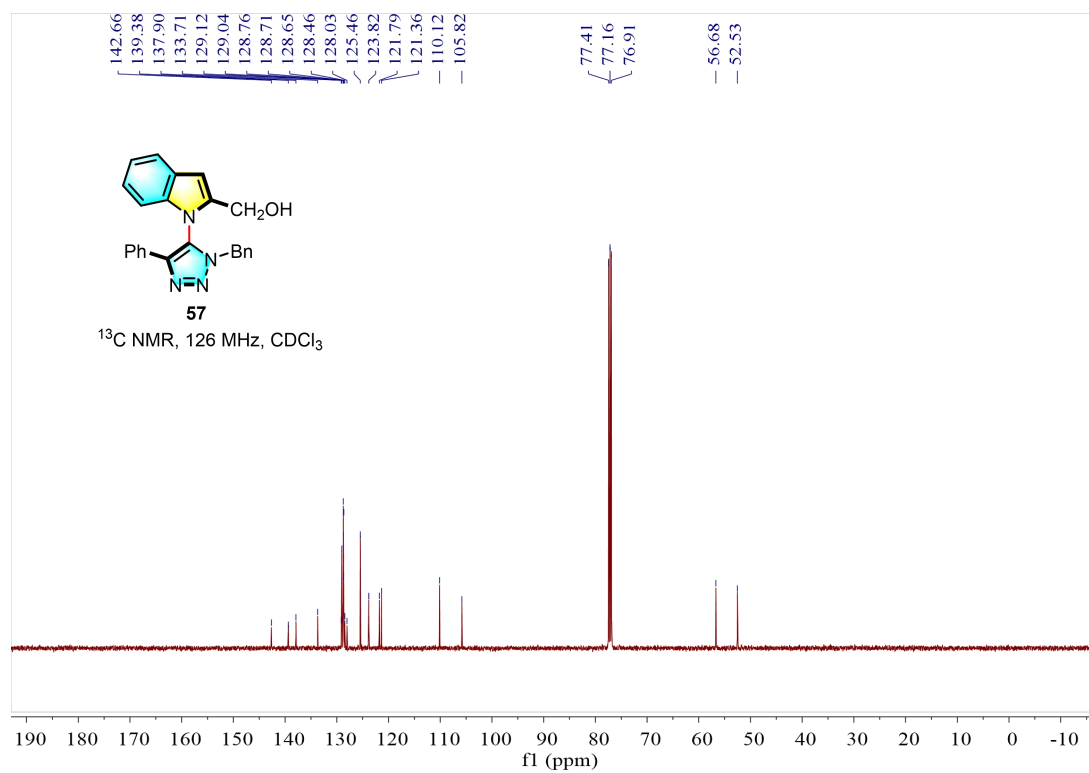

## 10. References

- [1] F. Wang, J. Jing, Y. Zhao, X. Zhu, X.-P. Zhang, L. Zhao, P. Hu, W.-Q. Deng, X. Li, *Angew. Chem. Int. Ed.*, **2021**, *60*, 16628-16633.
- [2] Y. Zhang, R. P. Hsung, M. R. Tracey, K. C. M. Kurtz, E. L. Vera, *Org. Lett.*, **2004**, *6*, 1151-1154.
- [3] X. Zeng, Y. Tu, Z. Zhang, C. You, J. Wu, Z. Ye, J. Zhao, *J. Org. Chem.*, **2019**, *84*, 4458-4466.
- [4] L. Zeng, J. Li, S. Cui, *Angew. Chem. Int. Ed.*, **2022**, *61*, e202205037.
